# Supplementary material for: Single-cell analyses reveal transient retinal progenitor cells in the ciliary margin of developing human retina
Source: PubMed Central journal article supplement (PMC11053058; doi:10.1038/s41467-024-47933-x), 2024-04-26
Supplement: 41467_2024_47933_MOESM1_ESM.pdf [file 41467_2024_47933_MOESM1_ESM.pdf]

# Single-cell analyses reveal transient retinal progenitor cells in the ciliary margin of developing human retina

Birthe Dorgau <sup>1\*</sup>, Joseph Collin <sup>1\*</sup>, Agata Rozanska <sup>1</sup>, Darin Zerti <sup>1,2</sup>, Adrienne Unsworth <sup>1</sup>, Moira Crosier <sup>1</sup>, Rafiqul Hussain <sup>1</sup>, Jonathan Coxhead <sup>1</sup>, Tamil Dhanaseelan <sup>1</sup>, Aara Patel <sup>3</sup>, Jane C Sowden <sup>3</sup>, David R FitzPatrick <sup>4</sup>, Rachel Queen <sup>1#</sup> and Majlinda Lako <sup>1#</sup>

\* Both authors contributed equally

# Senior corresponding authors

\* Corresponding authors. Email: [majlinda.lako@ncl.ac.uk](mailto:majlinda.lako@ncl.ac.uk) and [rachel.queen@ncl.ac.uk](mailto:rachel.queen@ncl.ac.uk)

**This PDF file includes:**

Supplementary Figures S1 to S11

**A**

**pcw 7.5**

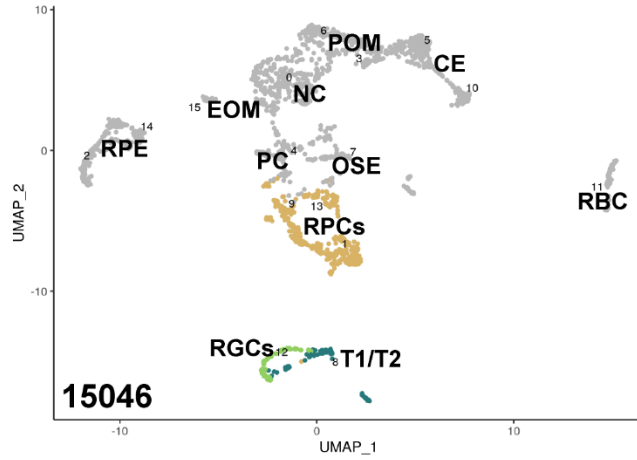

**pcw 7.7**

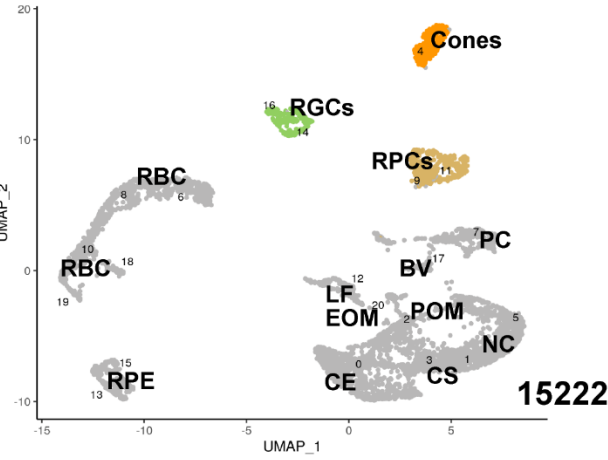

**pcw 8**

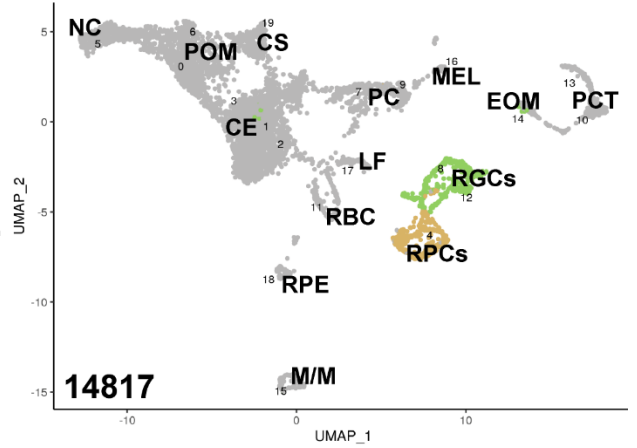

**pcw 8**

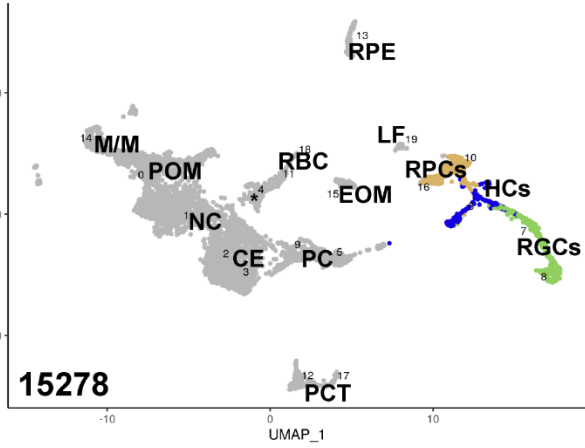

**pcw 8**

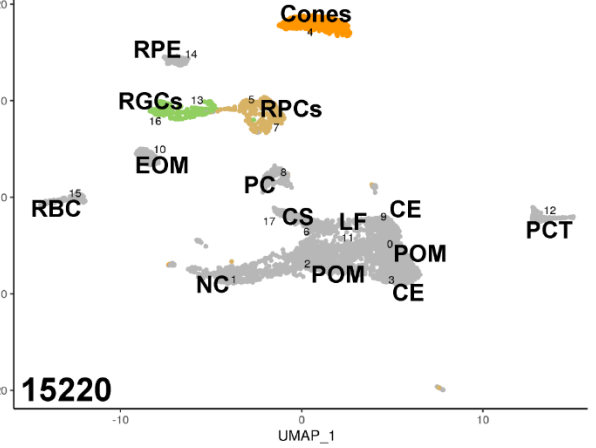

**pcw 8.5**

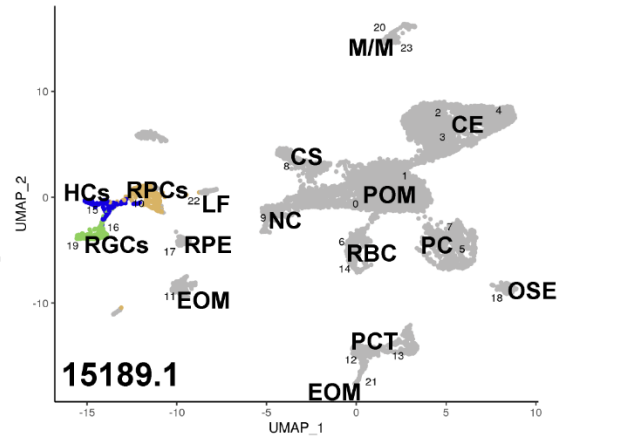

**pcw 8.5**

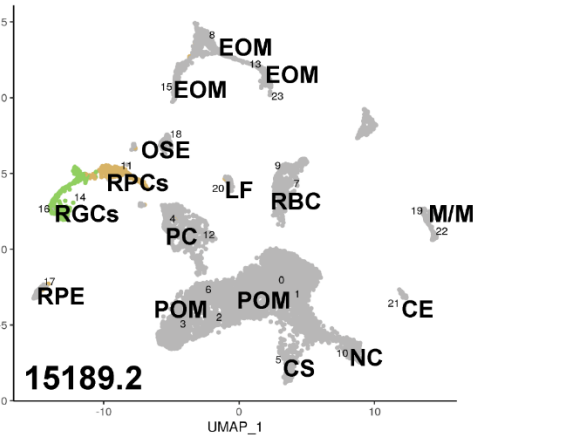

- non-retinal cells
  - RPE
  - Corneal endothelium (CE)
  - Corneal stroma (CS)
  - Lens fibre (LF)
  - Ocular surface epithelium (OSE)
  - Melanocytes (MEL)
  - Proliferating cells (PC)
  - Periocular mesenyme (POM)
  - Periocular connective tissue (PCT)
  - Extraocular muscle (EOM)
  - Neural crest (NC)
  - Monocytes/Macrophages (M/M)
  - Red blood cells (RBC)
  - Blood vessel (BV)
- RPCs
- RGCs
- Horizontal cells (HCs)
- Cones
- T1/T2

**B**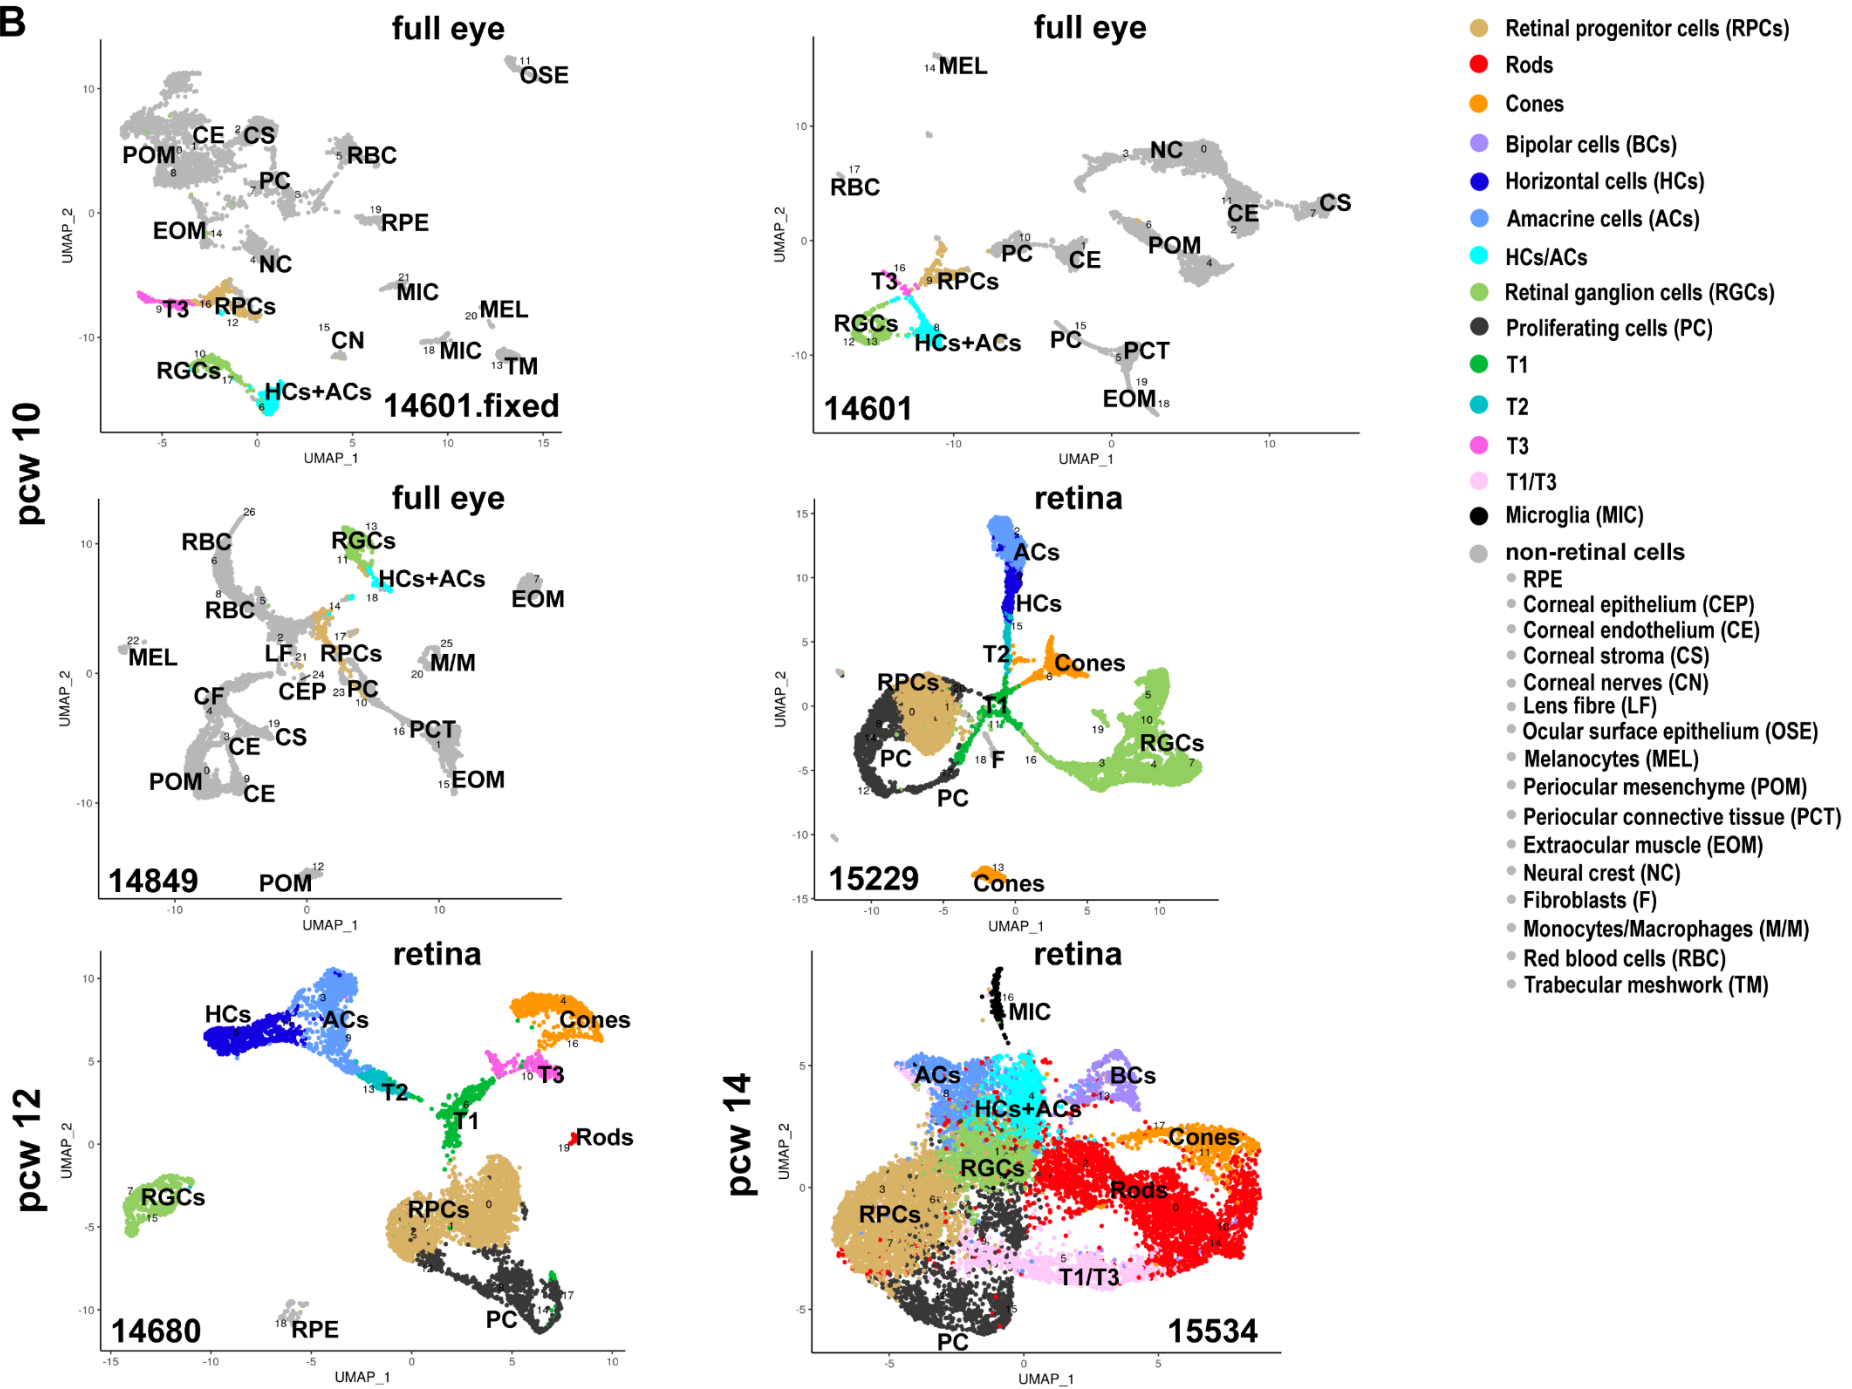

**C**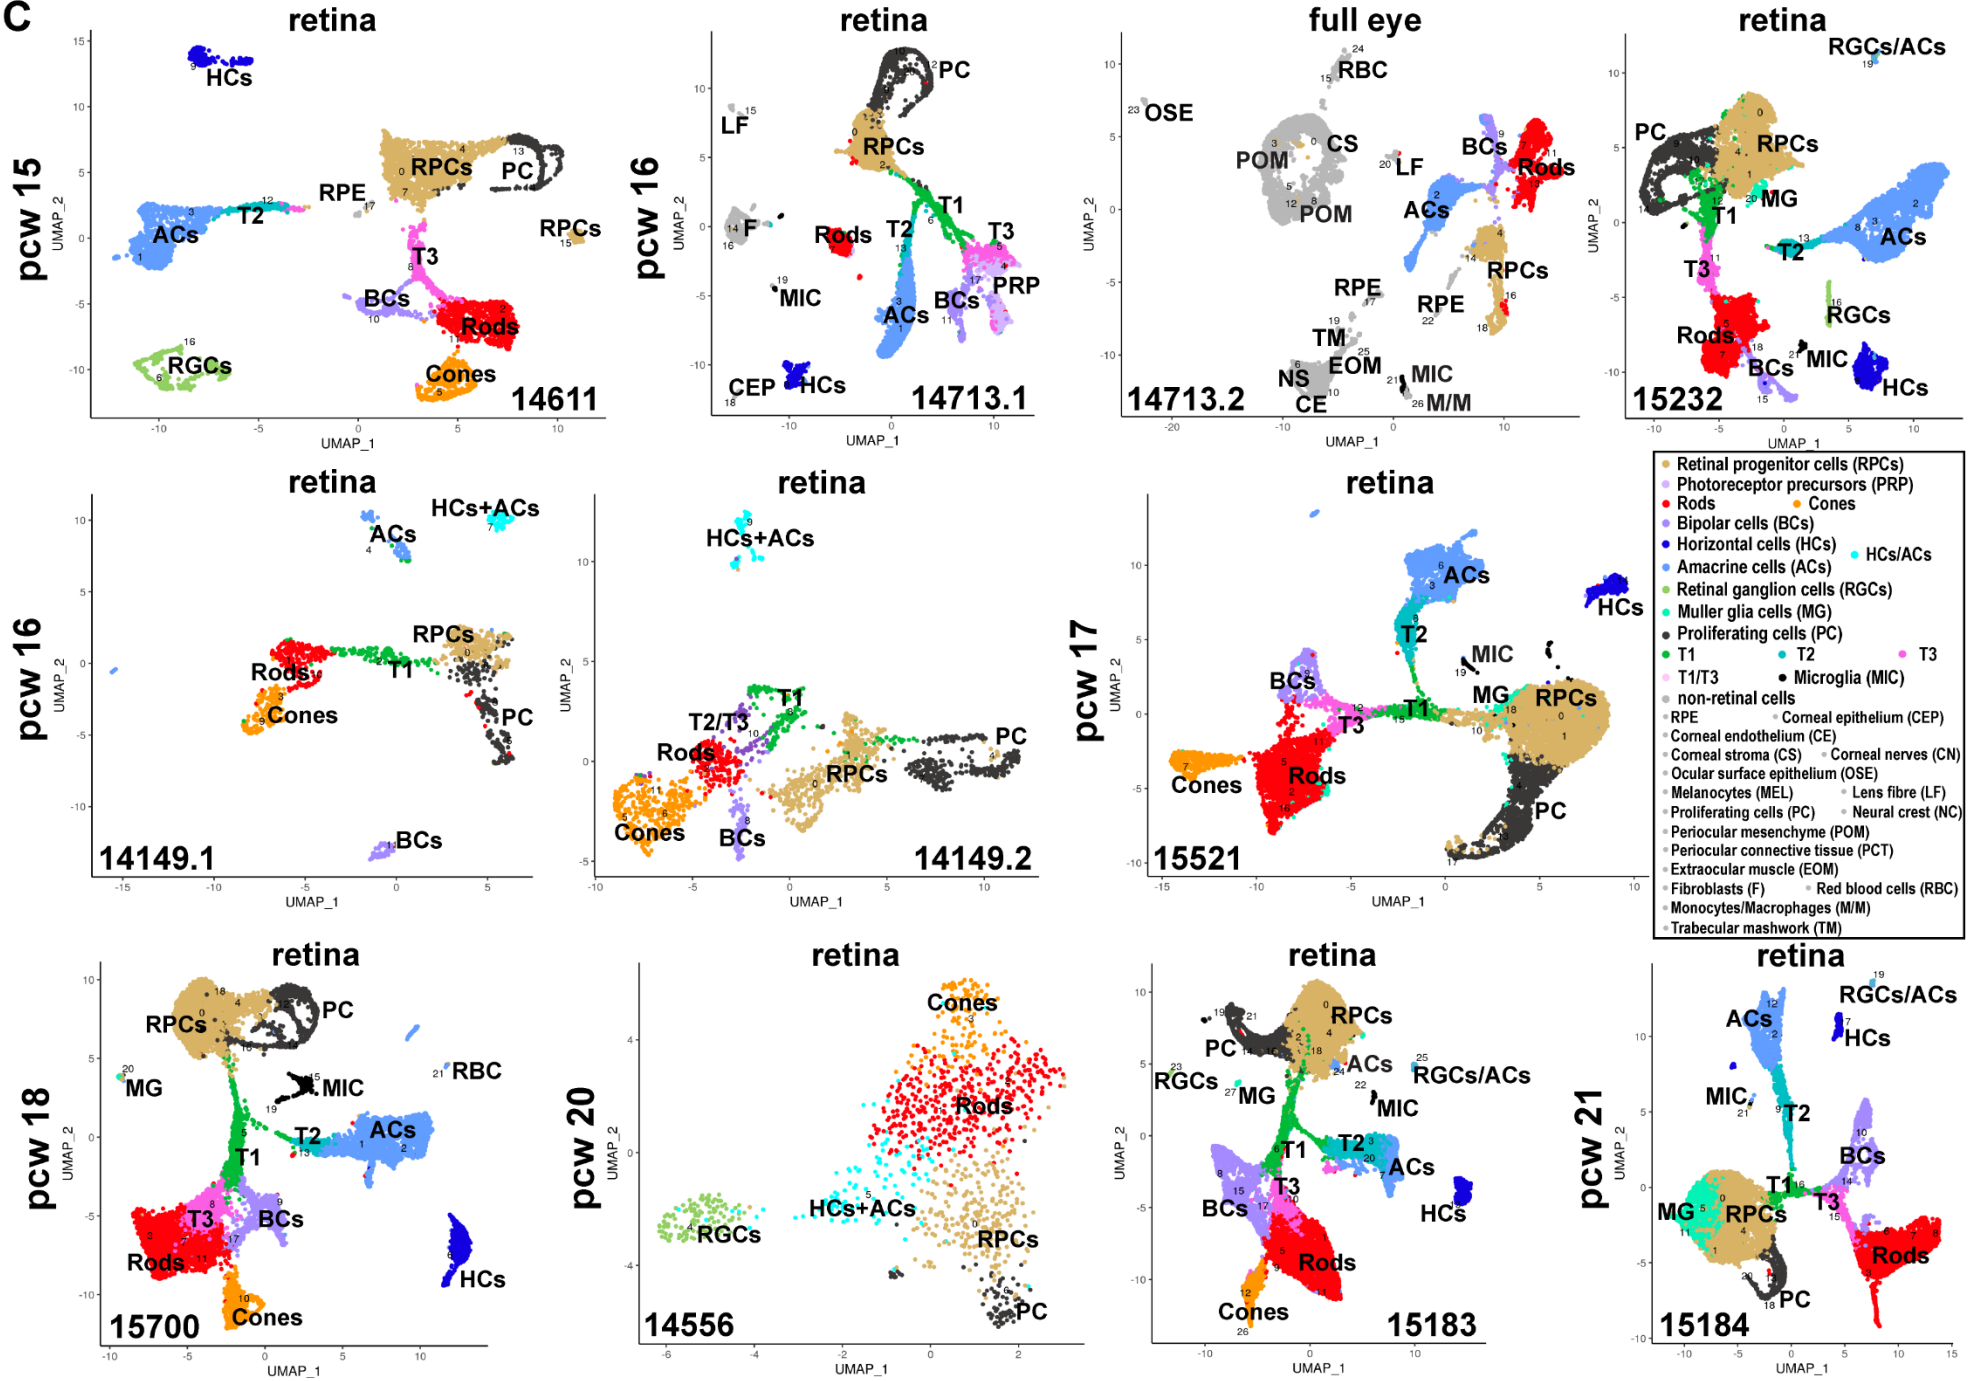

**Figures S1: Ordered emergence of all retinal cell types during human retinal development. A-C)** UMAP of scRNA-Seq from 7.5 – 8. PCW whole eyes (**A**), 10 – 14 PCW whole eyes/isolated foetal retina (**B**) and 15 – 21 PCW whole eyes/isolated foetal retina (**C**). Cluster identity was defined on the basis on expression of retinal specific cell markers shown in Supplementary Data 10. Highly expressed markers for each cluster are shown in Supplementary Data 1. Human developmental biology resource (HDBR) sample accession number is shown on each UMAP together with the embryonic or foetal age.

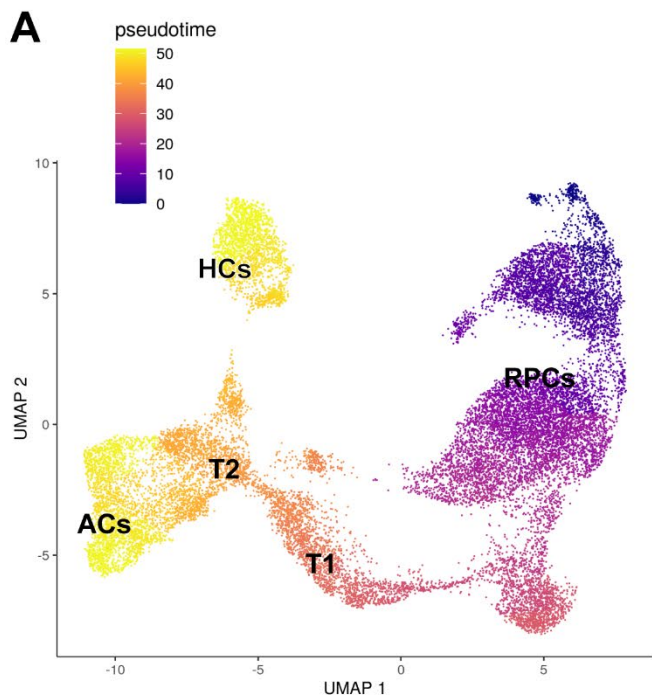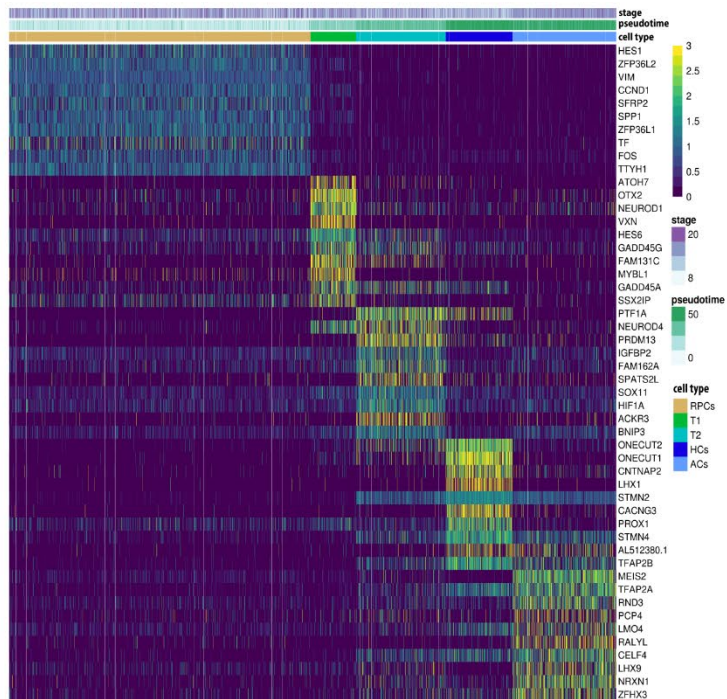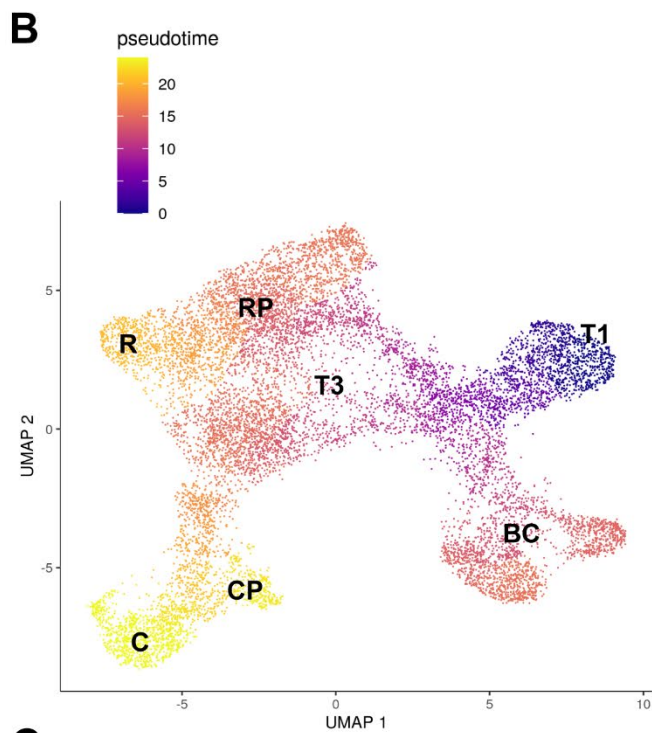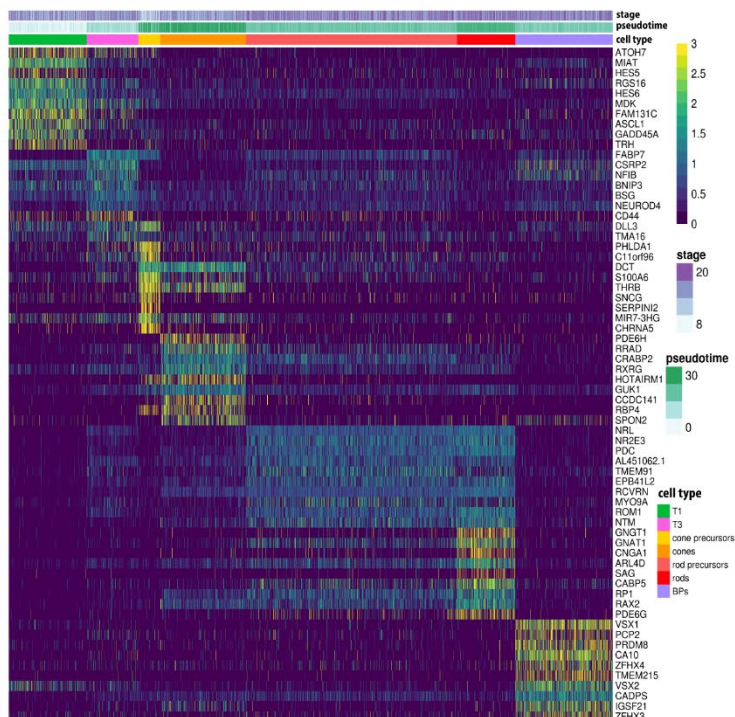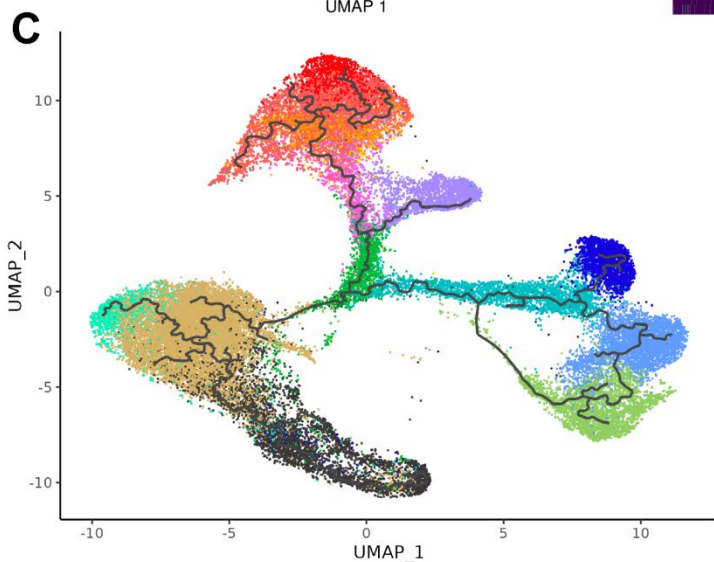

- amacrine cells (AC)
- bipolar cells (BC)
- cone precursors (CP)
- cones (C)
- horizontal cells (HC)
- muller glia cells (MG)
- proliferating RPCs (pRPCs)
- retinal ganglion cells (RGCs)
- rod precursors (RP)
- rods (R)
- retinal progenitor cells (RPCs)
- T1
- T2
- T3

**Figure S2: Pseudotime trajectory analysis showing the emergence of retinal cell types from neurogenic progenitors.**

**A)** Pseudotime trajectory analysis showing transition from RPCs to T1, T2 which give rise to horizontal and amacrine cells and gene expression heatmap indicating the distinct expression patterns of RPCs, T1, T2 and horizontal and amacrine cells. **B)** Pseudotime trajectory analysis showing transition from T1 to T3 bipotent progenitors which give rise to cone and rod photoreceptor and bipolar cells and gene expression heatmap revealing the distinct expression patterns of T1 and T3 progenitors and photoreceptor and bipolar cells. Note transition of mature cones and rods through cone and rod photoreceptors. Highly expressed markers for each cluster along the pseudotime trajectory are shown in Supplementary Data 2. **C)** Pseudotime trajectory over imposed on the integrated scRNA-Seq UMAP demonstrates that horizontal and amacrine cells go through an RPC-T1-T2 transition, whilst photoreceptor and bipolar cells go through an RPC-T1-T3 transition.

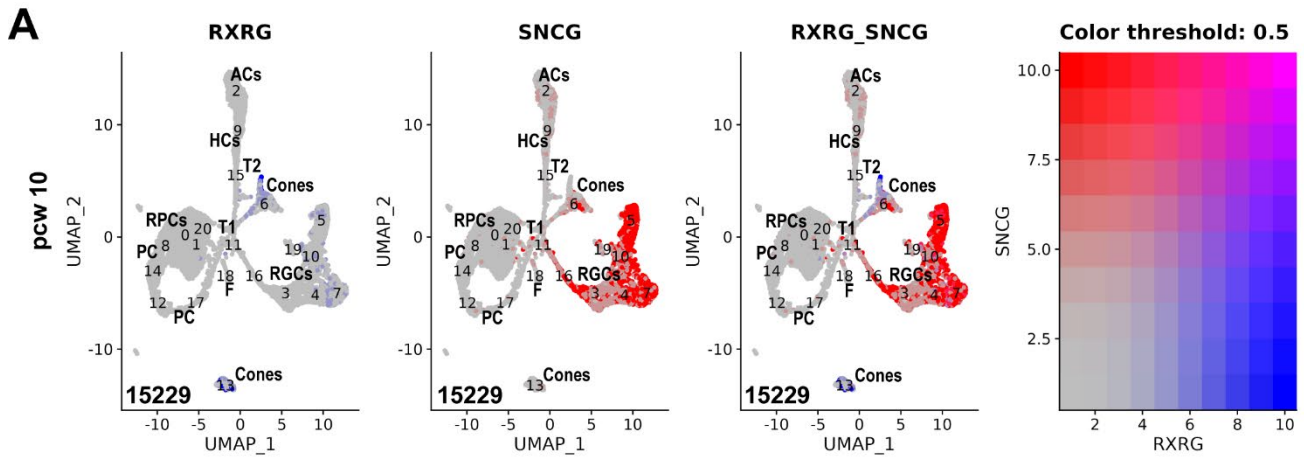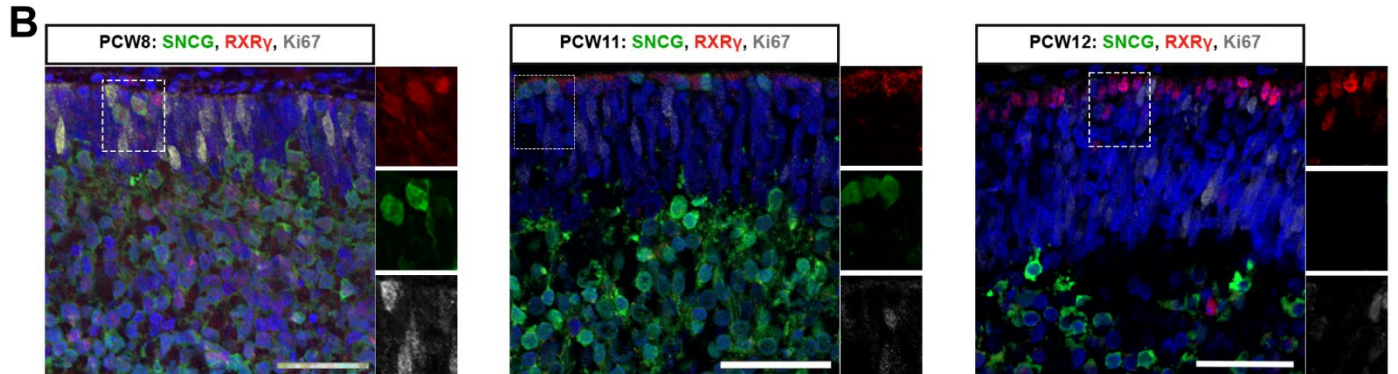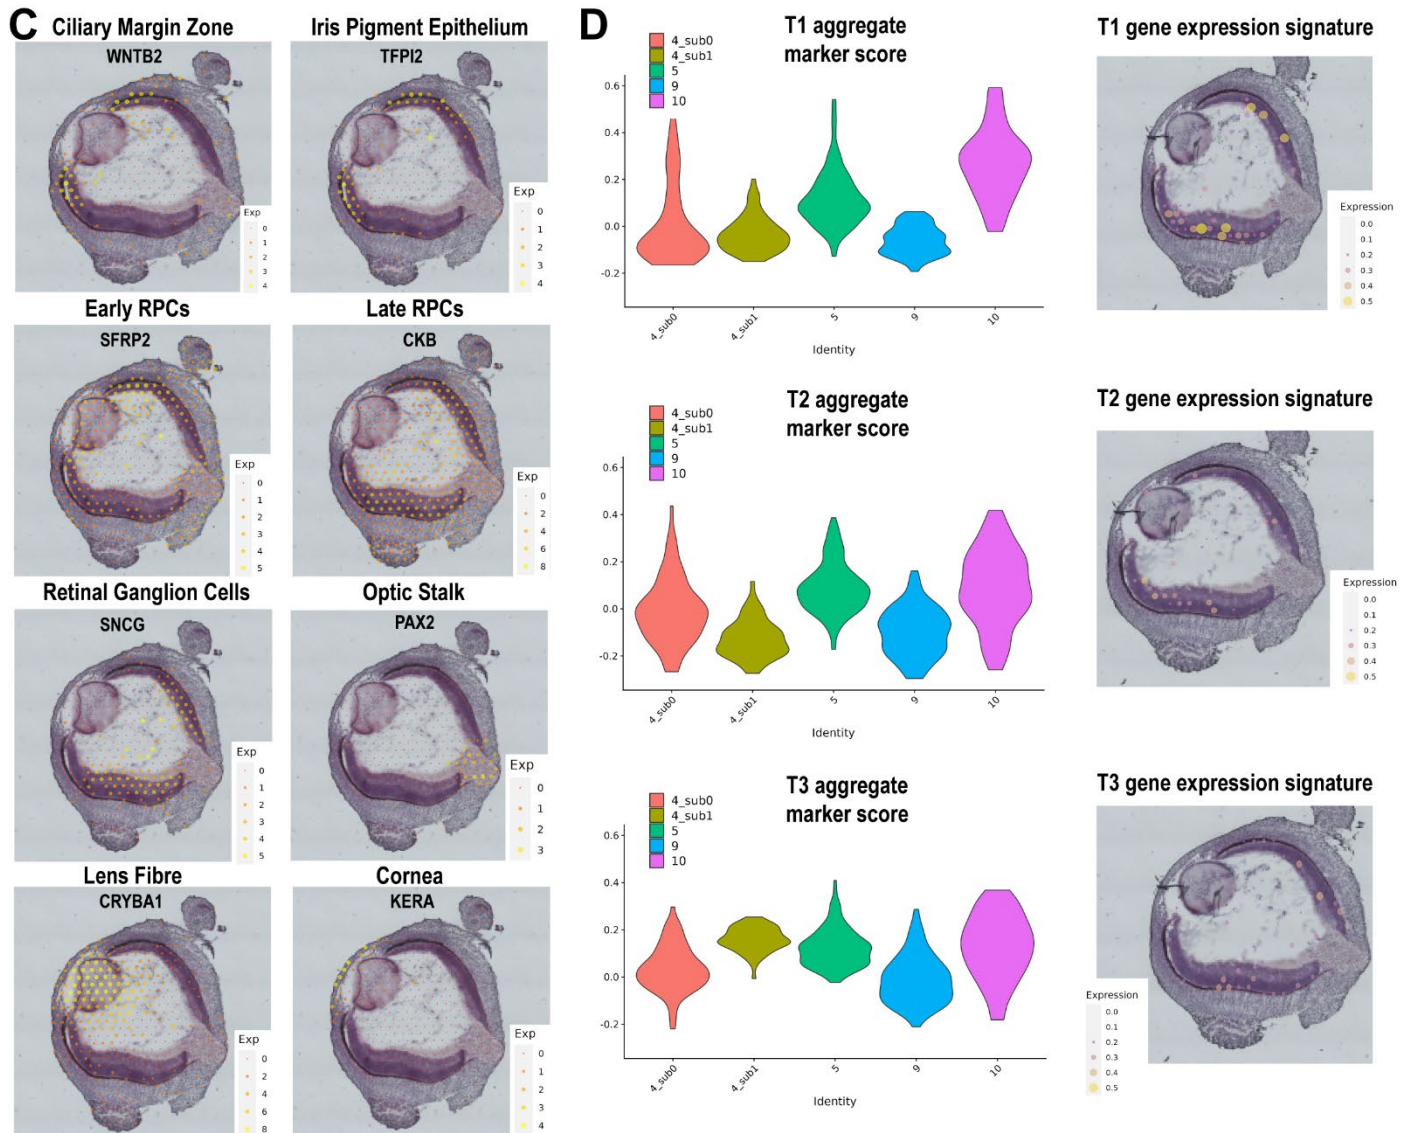



**Figure S3. Transient expression of RGCs markers in cone photoreceptors during human retinal development and spatial mapping of differentiated and progenitor cells in the developing human eye.** **A)** Overlay expression plots of the scRNA-Seq UMAP of 10 PCPW retina showing expression of the RGC marker SNCG and cone marker RXRG in the RGCs and cone photoreceptor clusters. **B)** Immunofluorescence analysis showing the co-expression of cone photoreceptor marker RXR $\gamma$  with RGC marker SNCG. Co-expression is strong in the early developmental stages (8 PCW) in both proliferating and non-proliferating cone progenitors but tails off at 12 PCW. Scale bars = 50  $\mu$ m. **C)** Expression of key markers for various eye and retinal cells superimposed on the ST image of the 8 PCW eye shown in Figure 2A-C. **D)** Expression violin plots of aggregate expression scores showing the predominant spatial expression of T1, T2, and T3 neurogenic progenitors in the outer neuroblastic layer of the central retina in the 8 PCW eye.

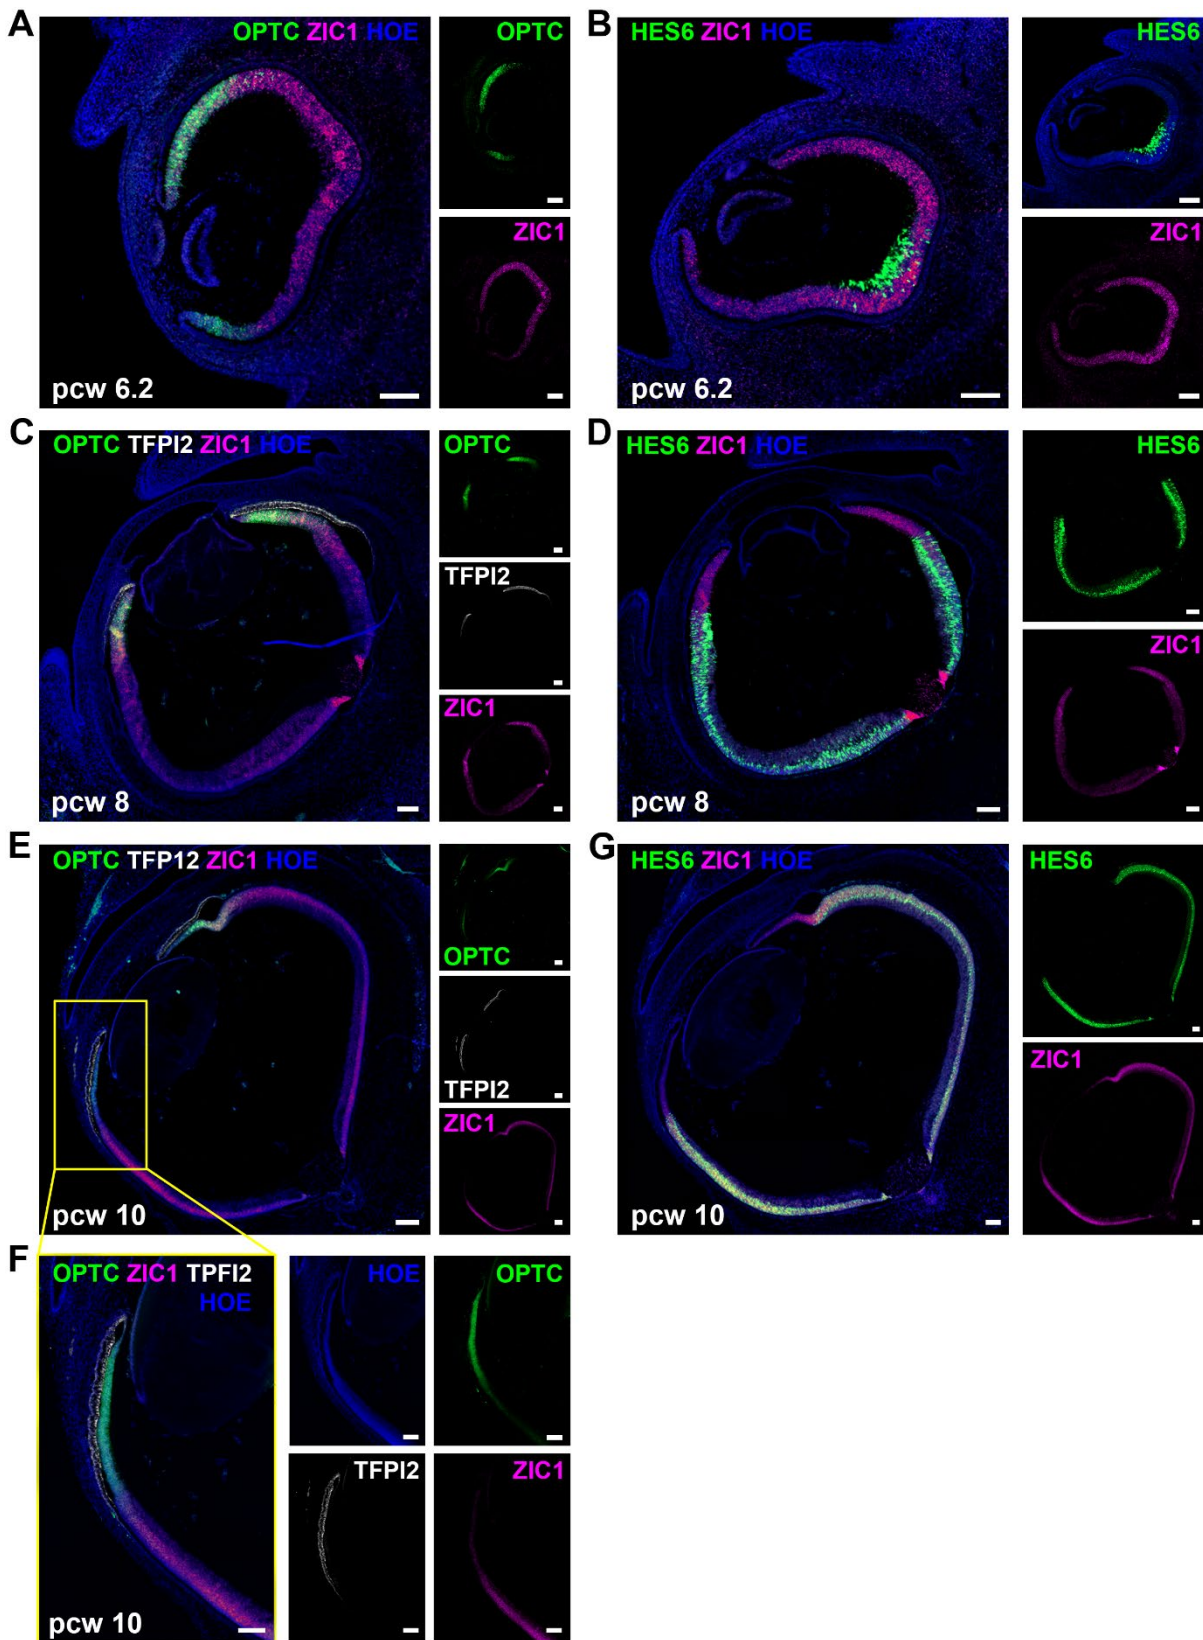

**Figure S4: RNAscope reveals strong expression of early RPC marker *ZIC1* in the CMZ of 6.2 -8 PCW human retina. A, C) Overlapping expression of ciliary body marker *OPTC* with early RPC marker *ZIC1* and iris pigmented epithelial marker *TFPI2* in the ciliary margin zone of 8 PCW retina. B, D, G) The expression of late RPC/NRPC marker *HES6* is observed in the central retina, but not in the CMZ. E, F) Decreasing expression of *ZIC1* in the ciliary margin zone of 10 PCW human retina. Scale bars= 100 μM.**

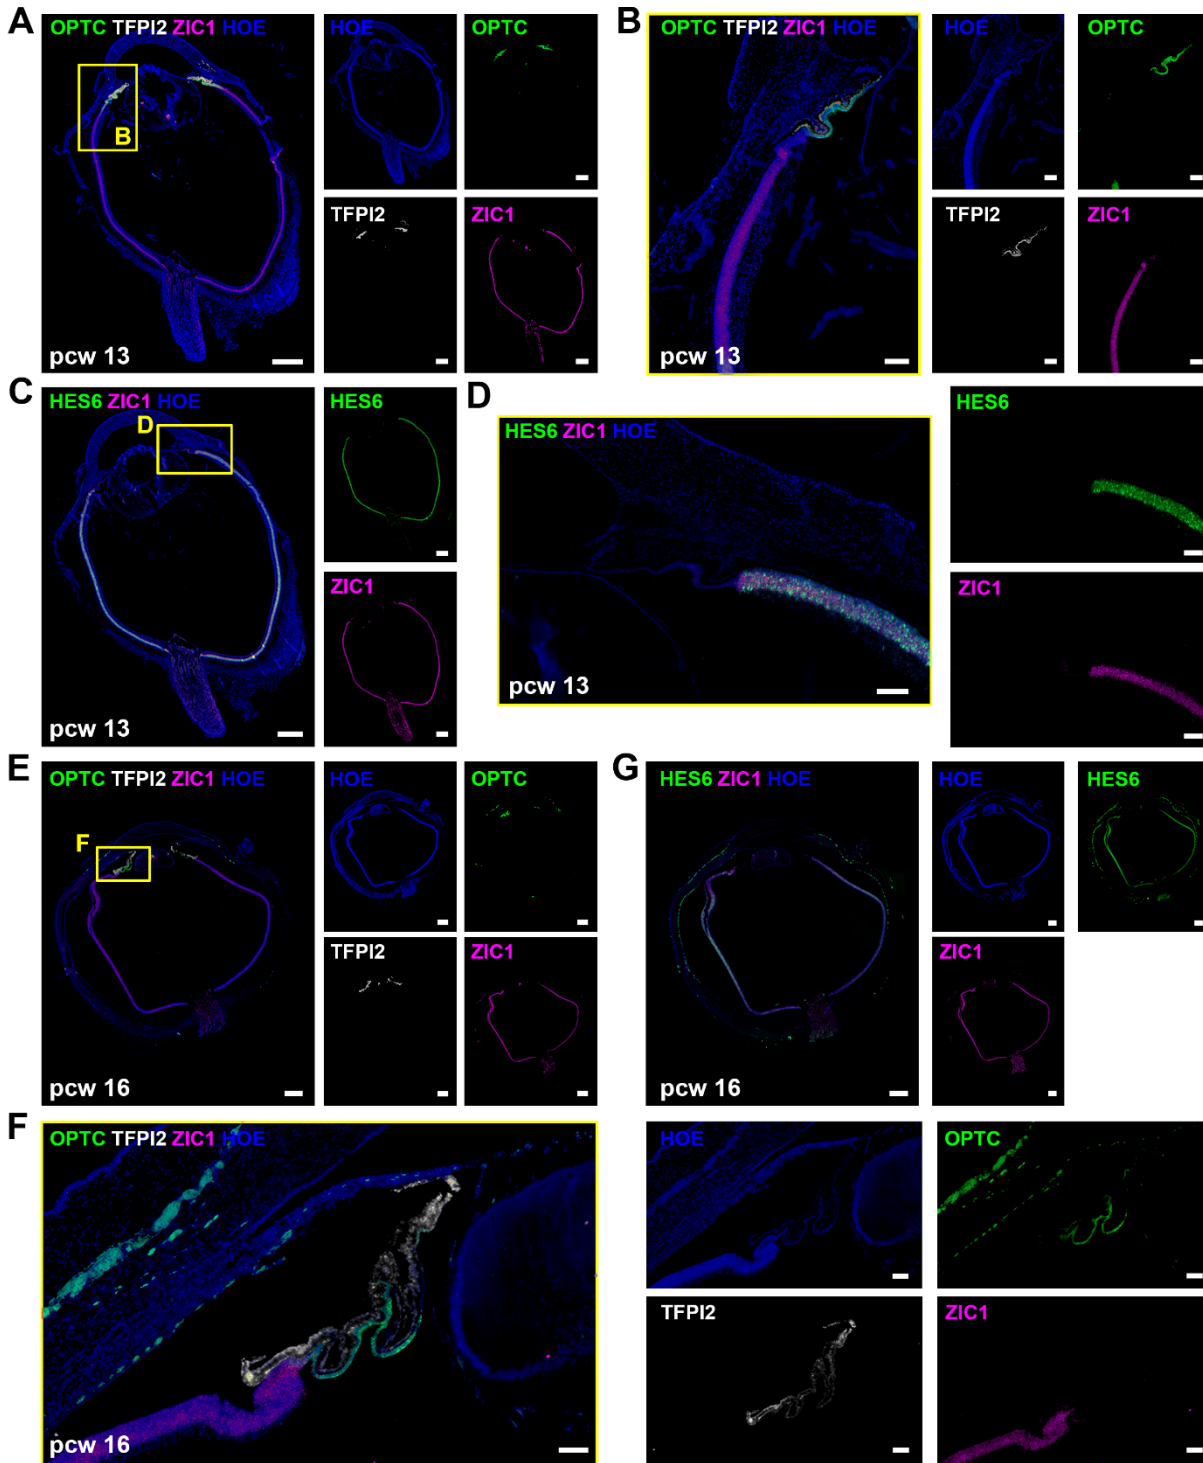

**Figure S5: The early RPC marker *ZIC1* is absent from the ciliary margin zone of 13-16 PCW human retina. A, B, E, F) *ZIC1* expression does not co-localise with ciliary body marker *OPTC* and iris pigmented epithelial marker *TFPI2* in the ciliary margin zone of 13-16 PCW. C, D, G) Co-localisation of *ZIC1* with *HES6* in the central retina of 13-16 PCW. Scale bars of panel A, C, E and G = 500µm and panels B, E and F (magnifications) = 100µm.**

**A**

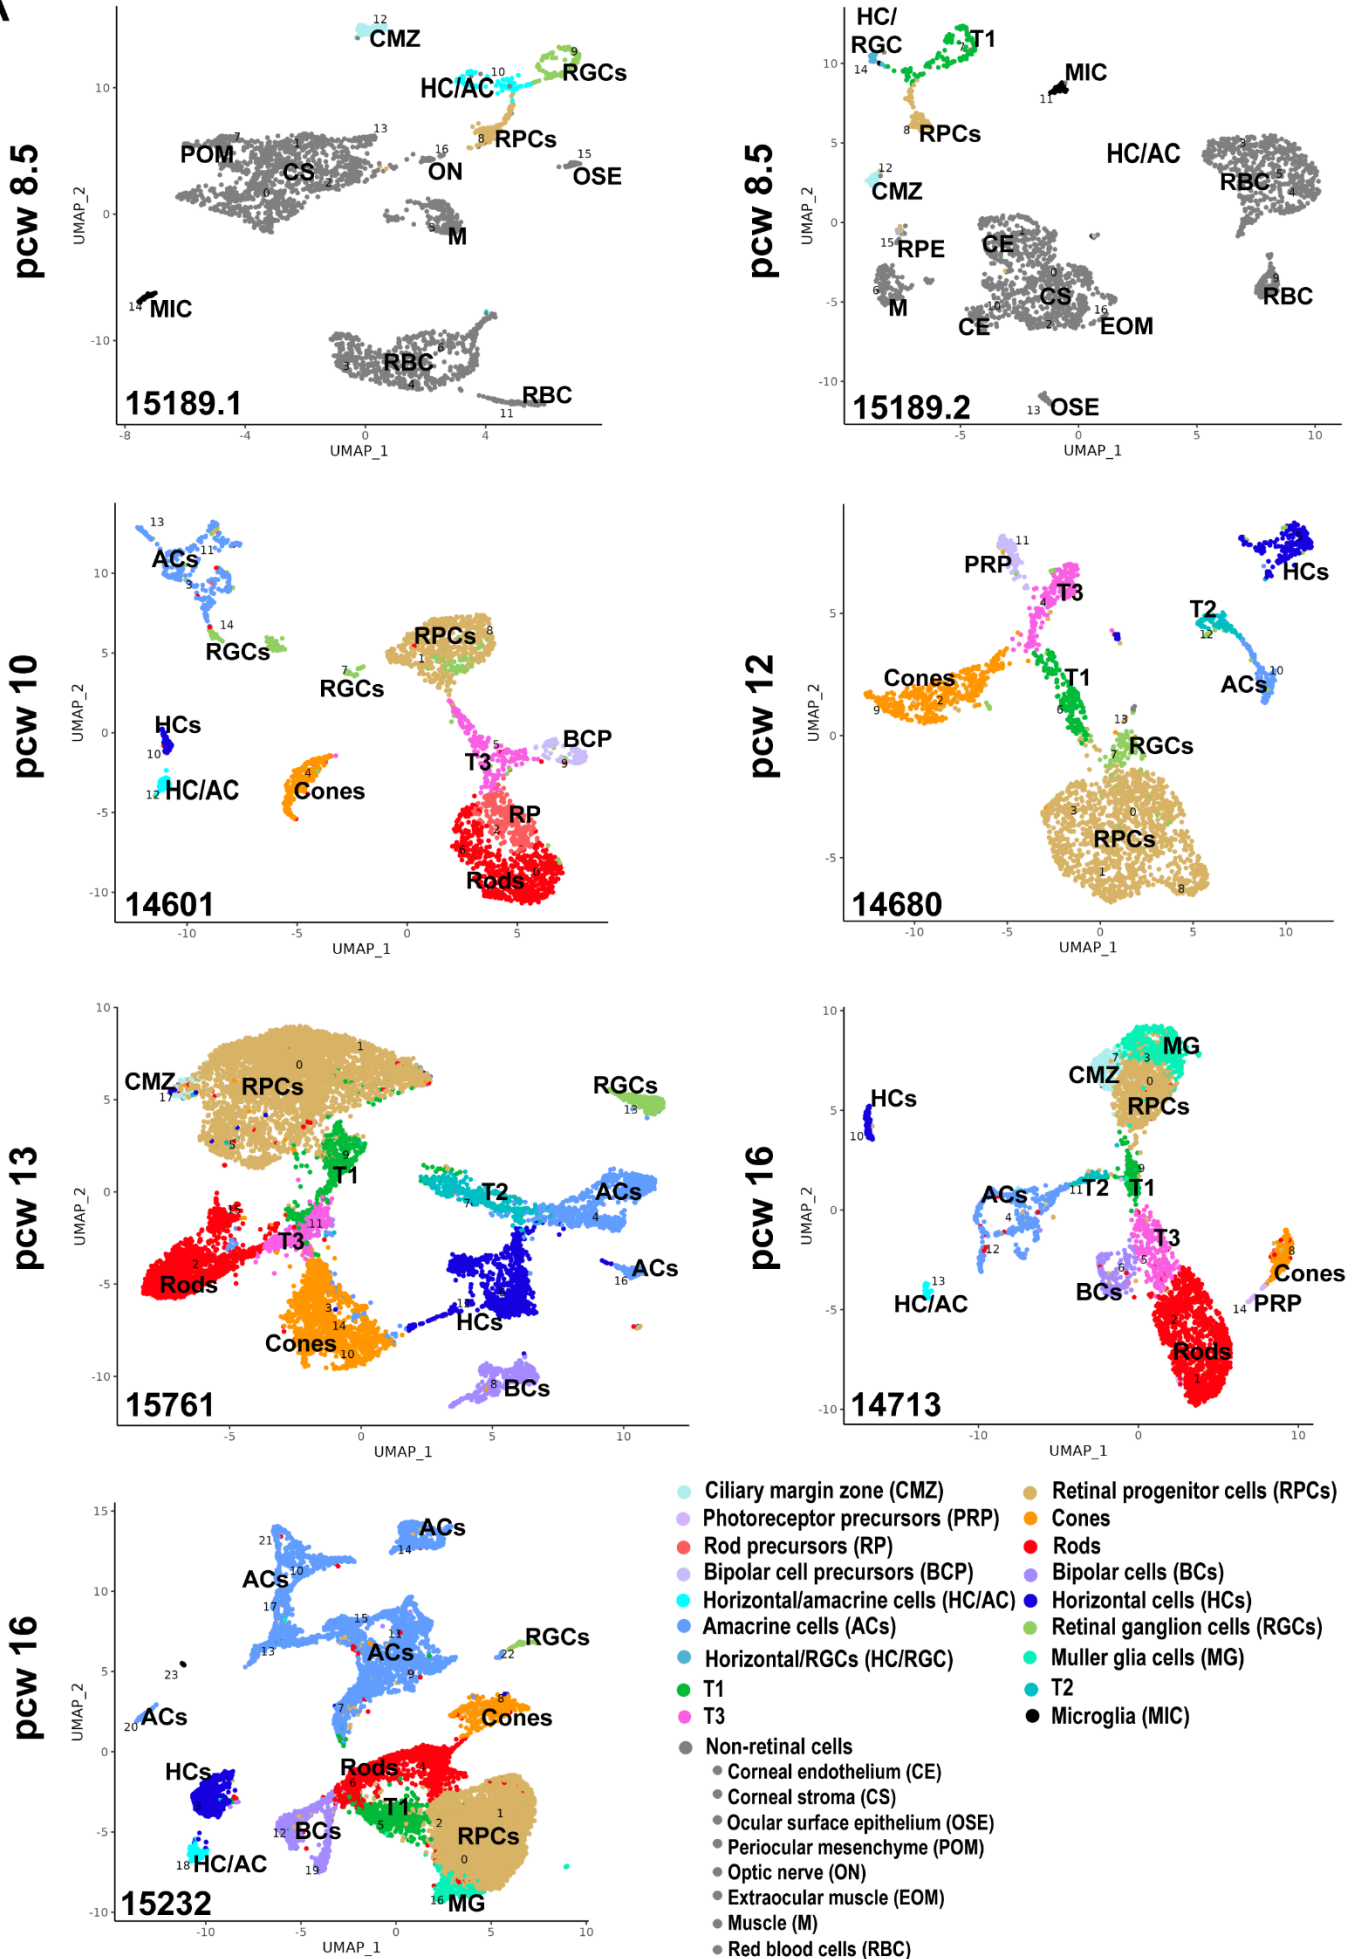

**B****pcw 17**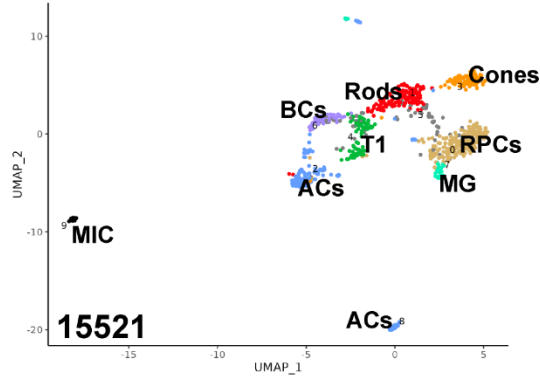**pcw 18**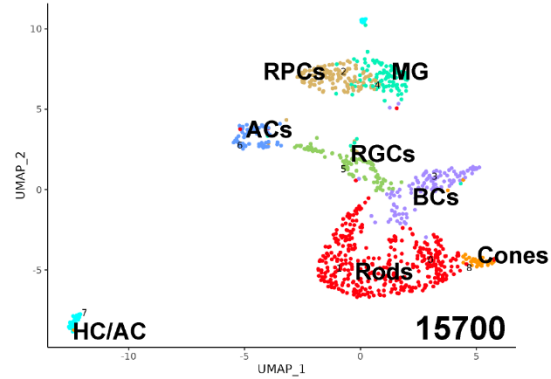**pcw 20**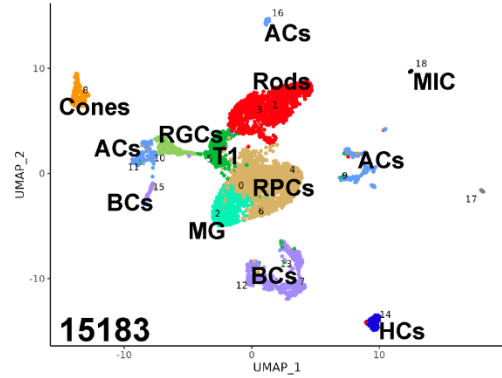**pcw 20**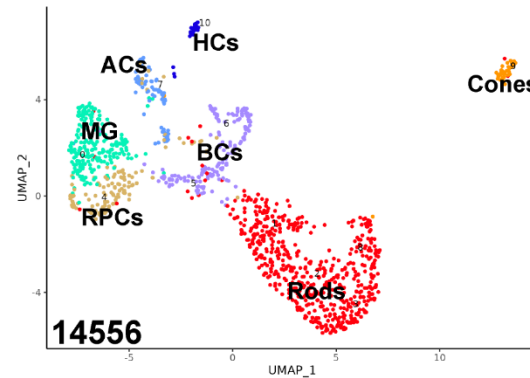**pcw 21**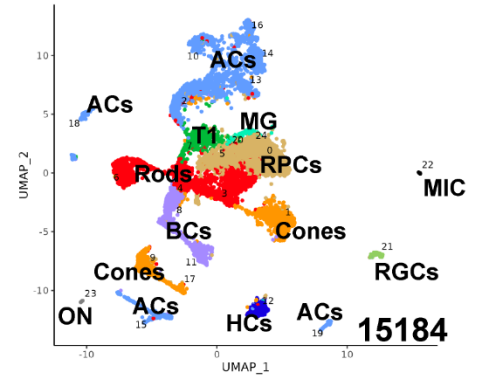

- Retinal progenitor cells (RPCs)
- Cones
- Rods
- Bipolar cells (BCs)
- Horizontal cells (HCs)
- Amacrine cells (ACs)
- Horizontal/amacrine cells (HC/AC)
- Retinal ganglion cells (RGCs)
- Muller glia cells (MG)
- Microglia (MIC)
- T1
- Non-retinal cells
- Optic nerve (ON)

**C****Integrated scATAC-Seq**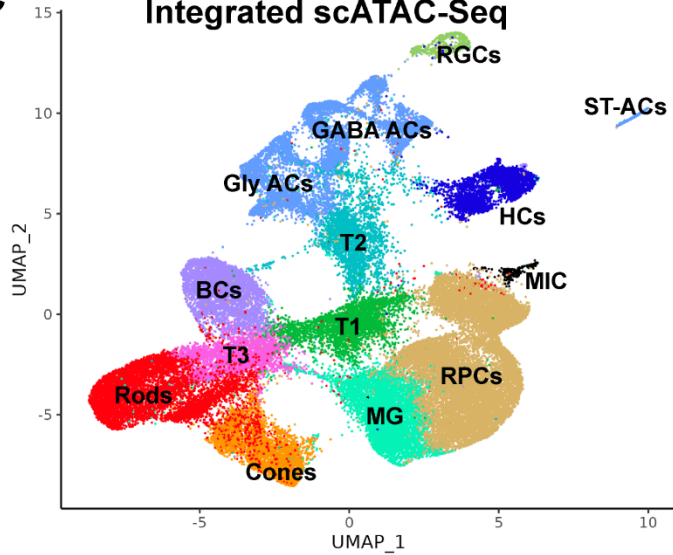

- Retinal progenitor cells (RPCs)
- Cones
- Rods
- Bipolar cells (BCs)
- Horizontal cells (HCs)
- Amacrine cells (ACs)
- GABAergic ACs (GABA ACs)
- Glycinergic ACs (Gly ACs)
- Starburst (ST ACs)
- Retinal ganglion cells (RGCs)
- Muller glia cells (MG)
- Microglia (MIC)
- T1
- T2
- T3

**Figure S6: Single cell ATAC-Seq of whole human eyes or developing retina. A-B)** UMAPs of individual datasets from 8 – 21 PCW. Human developmental biology resource (HDBR) sample accession number are shown on each UMAP together with the embryonic or foetal age. **C)** Integrated scATAC-Seq data of 8-21 PCW. Cluster identity was defined on the basis of gene activity scores, calculated based on open regions of the chromatin of retinal specific cell markers (Supplementary Data 5).

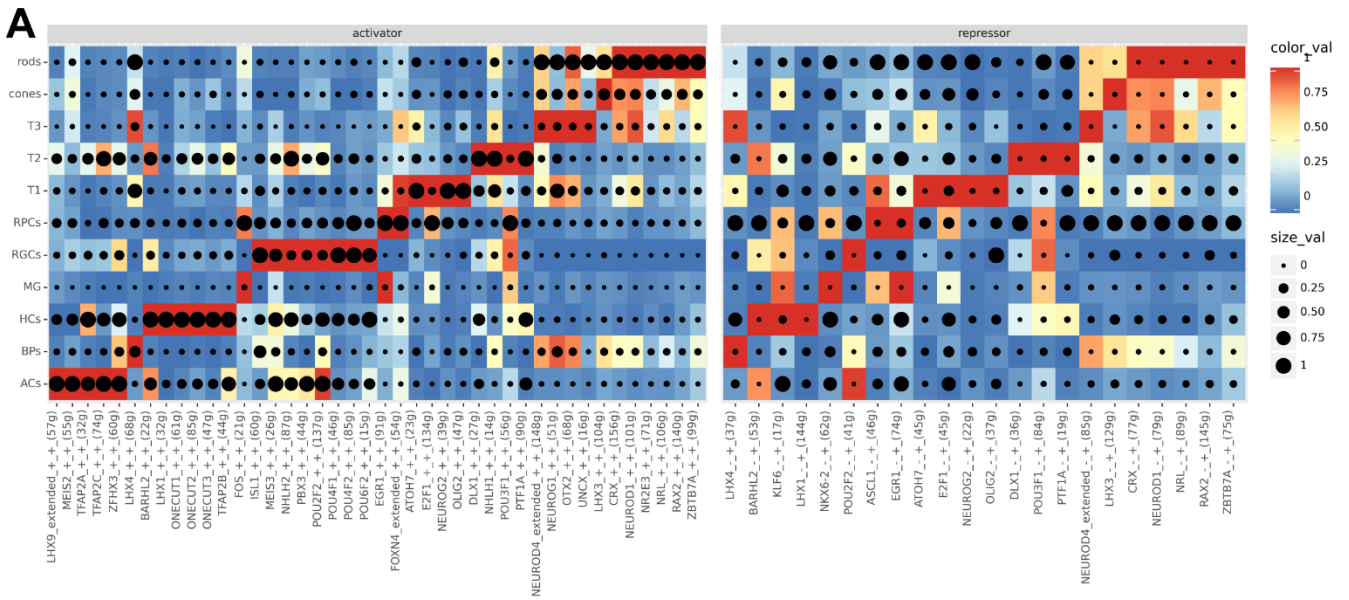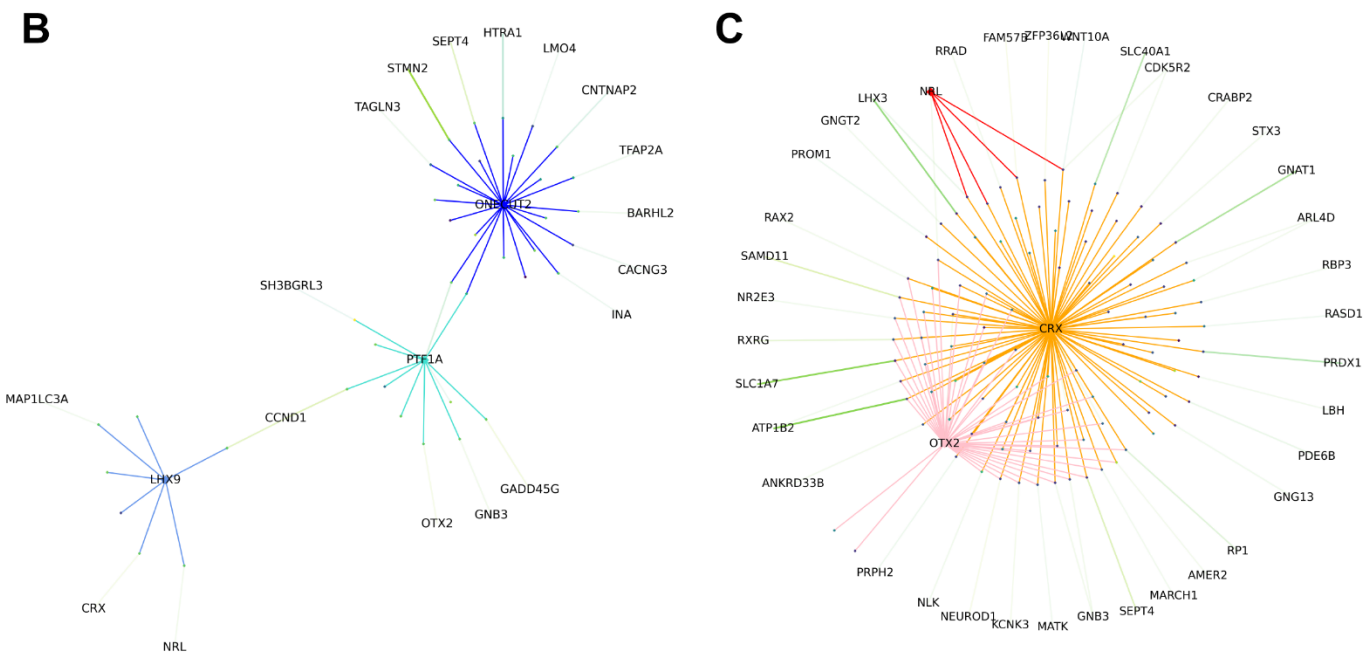

**Figure S7: Results of SCENIC+ analysis.** **A)** Heatmap illustrating the expression of cell-type-specific transcription factors (TFs) within the eRegulon. The colours indicate the intensity of expression, and the size of the dot indicates the cell-type specificity (RSS). The cell types are arranged by similarities in gene expression. **B, C)** Enhancer-driven Gene Regulatory Network (eGRN) are depicted for LHX9, PTF1A and ONECUT2 (B) and OTX2, CRX and NRL (C). The TFs are named in the networks and connected to candidate enhancer regions (represented by unlabelled dots) with edges with the following colours: Light blue - LHX9, Turquoise- PTF1A, Dark Blue- ONECUT2, Pink- OTX2, Orange- CRX and Red- NRL. These candidate enhancer regions are subsequently linked to genes (labelled) within the regulon. The edge colour between the candidate enhancer regions and gene is determined by the region-to-gene correlation score.

**A**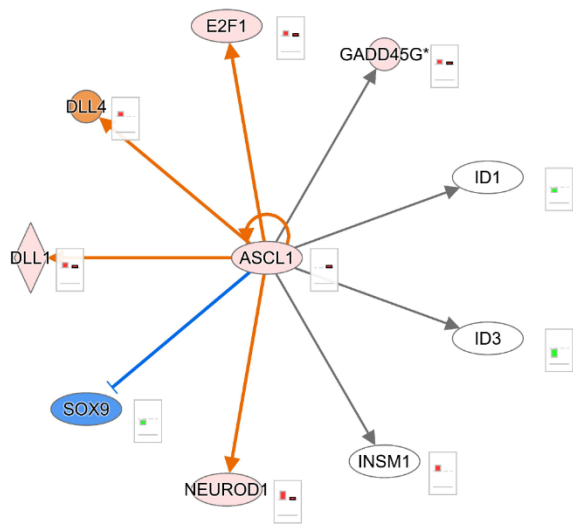**B**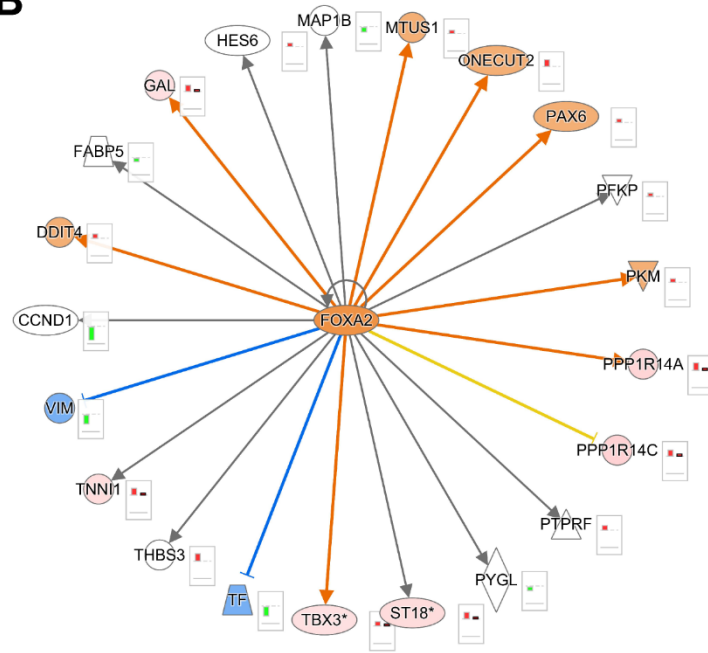**C**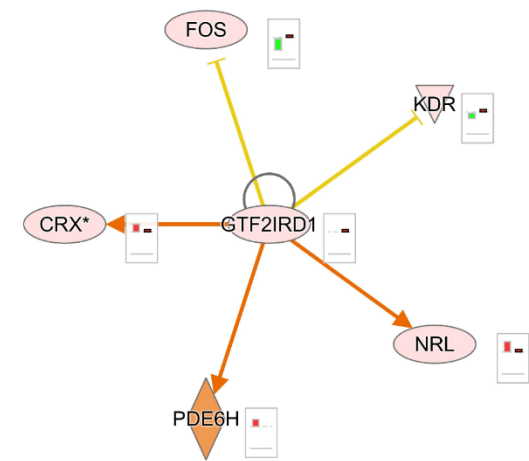**D**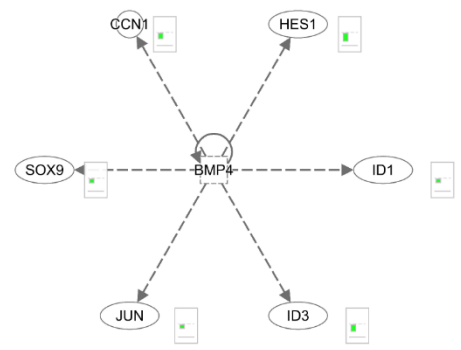**E**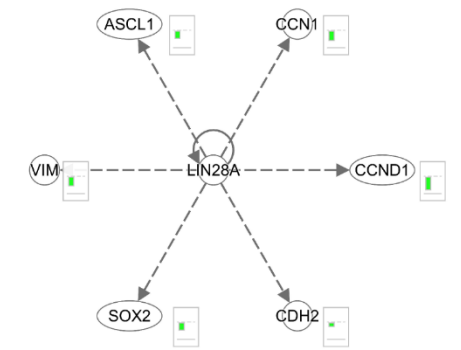**F**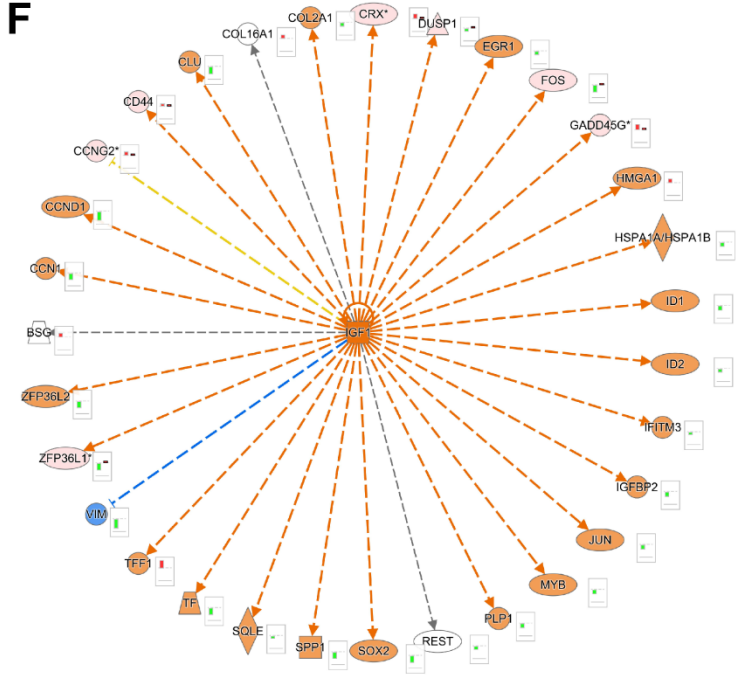**Prediction Legend**

|                                                         |      |
|---------------------------------------------------------|------|
| more extreme in dataset                                 | less |
| Increased measurement                                   | less |
| Decreased measurement                                   | less |
| more confidence                                         | less |
| Predicted activation                                    | less |
| Predicted inhibition                                    | less |
| Glow indicates activity when opposite of measurement    |      |
| <b>Predicted Relationships</b>                          |      |
| Leads to activation                                     |      |
| Leads to inhibition                                     |      |
| Findings inconsistent with state of downstream molecule |      |
| Effect not predicted                                    |      |



**Figure S8: Representative gene regulatory networks in T1 (A, D), T2 (B, E), and T3 (C, F) transient neurogenic progenitors depicting activated and inhibited upstream regulators and their target genes.** Upstream regulatory networks were generated with IPA using differentially expressed genes from the scRNA-Seq data and differential accessibility analysis in the scATAC-Seq data. The networks show predictions of upstream regulators which might be activated or inhibited to explain observed upregulation/downregulations in the data. The barplots next to each molecule represent the relative expression in the sRNA-Seq (column 1) and scATAC-Seq datasets (column 2). The colours for the network nodes/barplots indicate observed upregulation/ increased chromatin accessibility (red), predicted upregulation/increased chromatin accessibility (orange), observed downregulation (green) and predicted downregulation/ decreased chromatin accessibility (blue). The colour of the edges represents the relationships between the molecules; orange = prediction and observation are consistent with activation; blue = prediction and observation are consistent with downregulation; yellow = prediction and observation are inconsistent; and grey relationship between the molecules is available in the IPA knowledge database. \*- indicates duplicates in scATAC-Seq dataset.

### A retinal ganglion cells

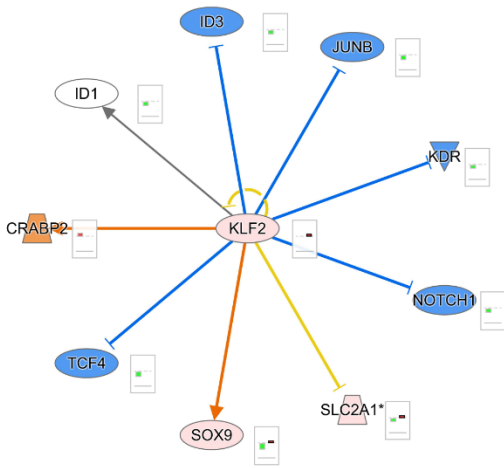

### B horizontal cells

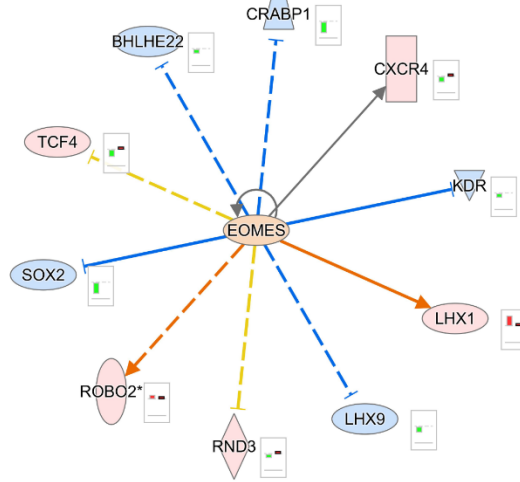

### C amacrine cells

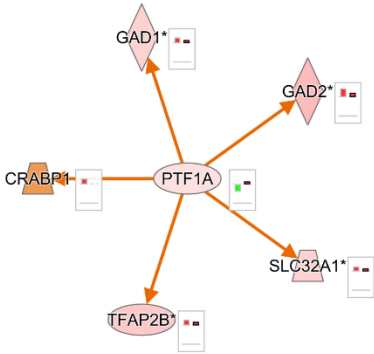

### D cones

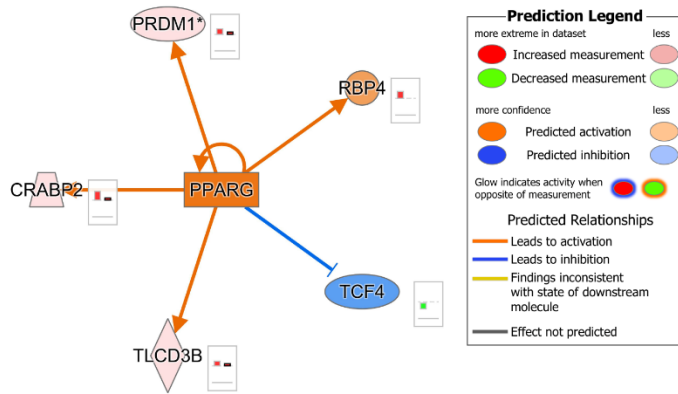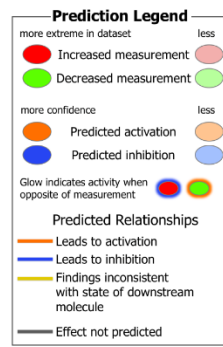

### E rods

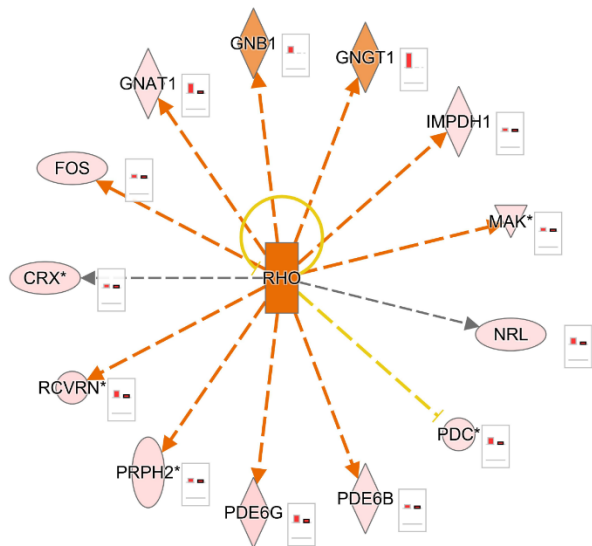

### F bipolar cells

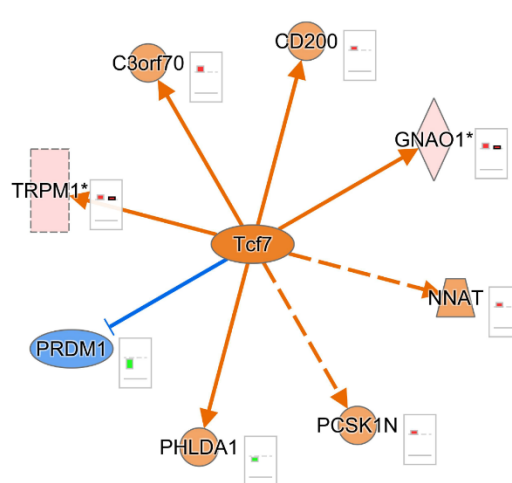

**Figure S9: Representative gene regulatory networks in RGCs (A), horizontal (B), amacrine (C), cones (D), rods (E) and bipolar cells (F).** Upstream regulatory networks were generated with IPA using differentially expressed genes from the scRNA-Seq data and differential accessibility analysis in the scATAC-Seq data. The networks show predictions of upstream regulators which might be activated or inhibited to explain observed upregulation/downregulations in the data. The barplots next to each molecule represent the relative expression in the sRNA-Seq (column 1) and scATAC-Seq datasets (column 2). The colours for the network nodes/barplots indicate observed upregulation/ increased chromatin accessibility (red), predicted upregulation/increased chromatin accessibility (orange), observed downregulation (green) and predicted downregulation/ decreased chromatin accessibility (blue). The colour of the edges represents the relationships between the molecules; orange = prediction and observation are consistent with activation; blue = prediction and observation are consistent with downregulation; yellow = prediction and observation are inconsistent; and grey relationship between the molecules is available in the IPA knowledge database. \*- indicates duplicates in scATAC-Seq dataset.

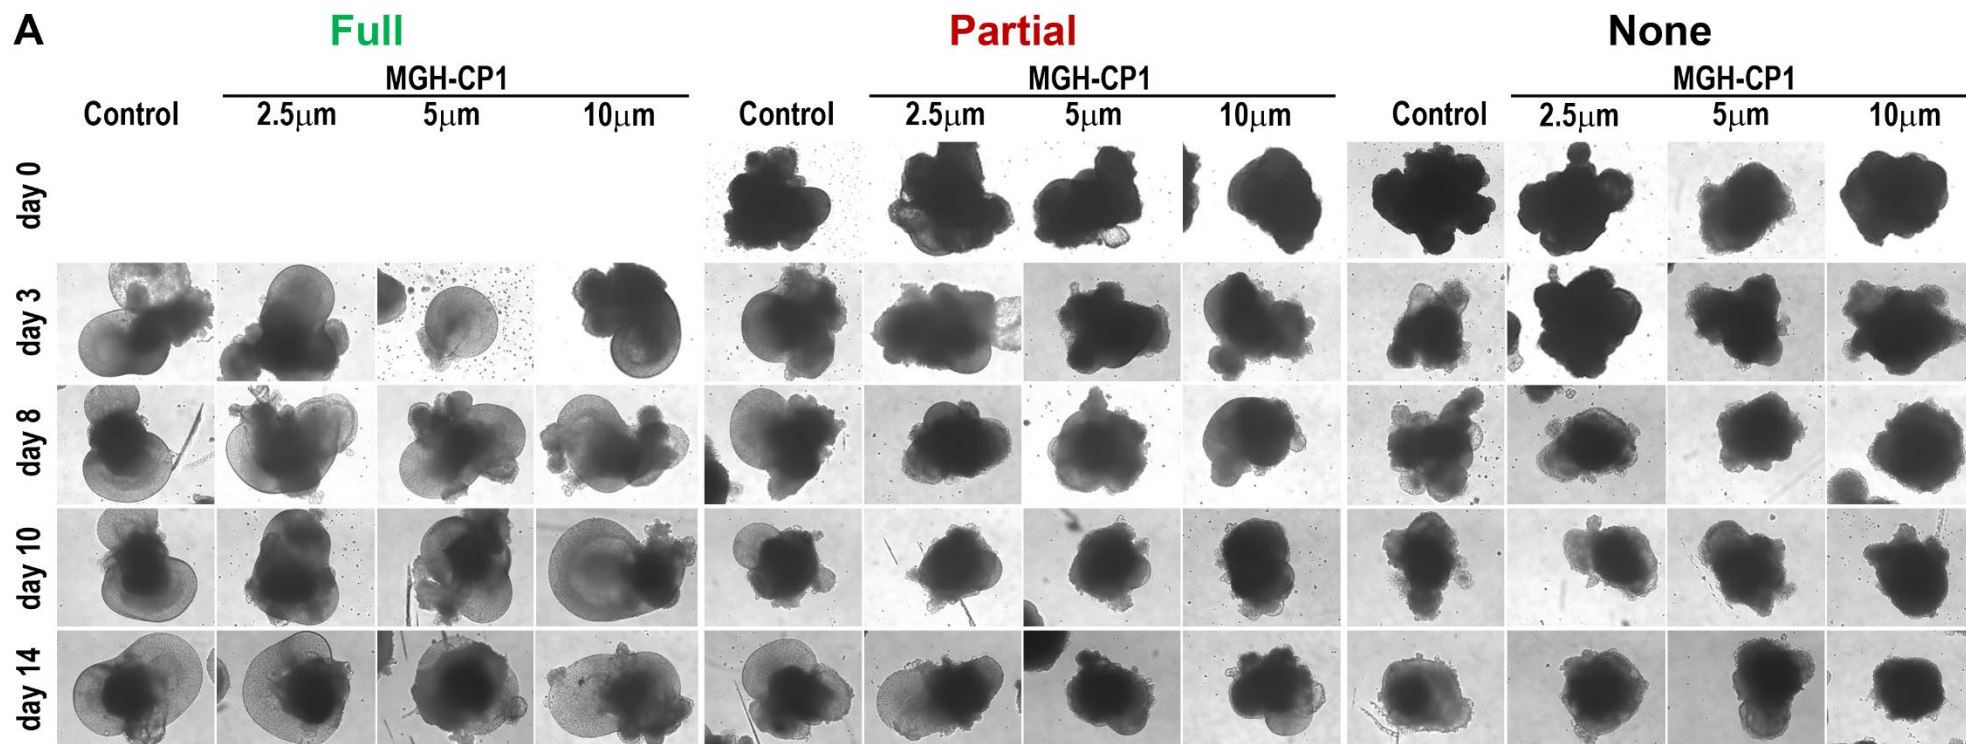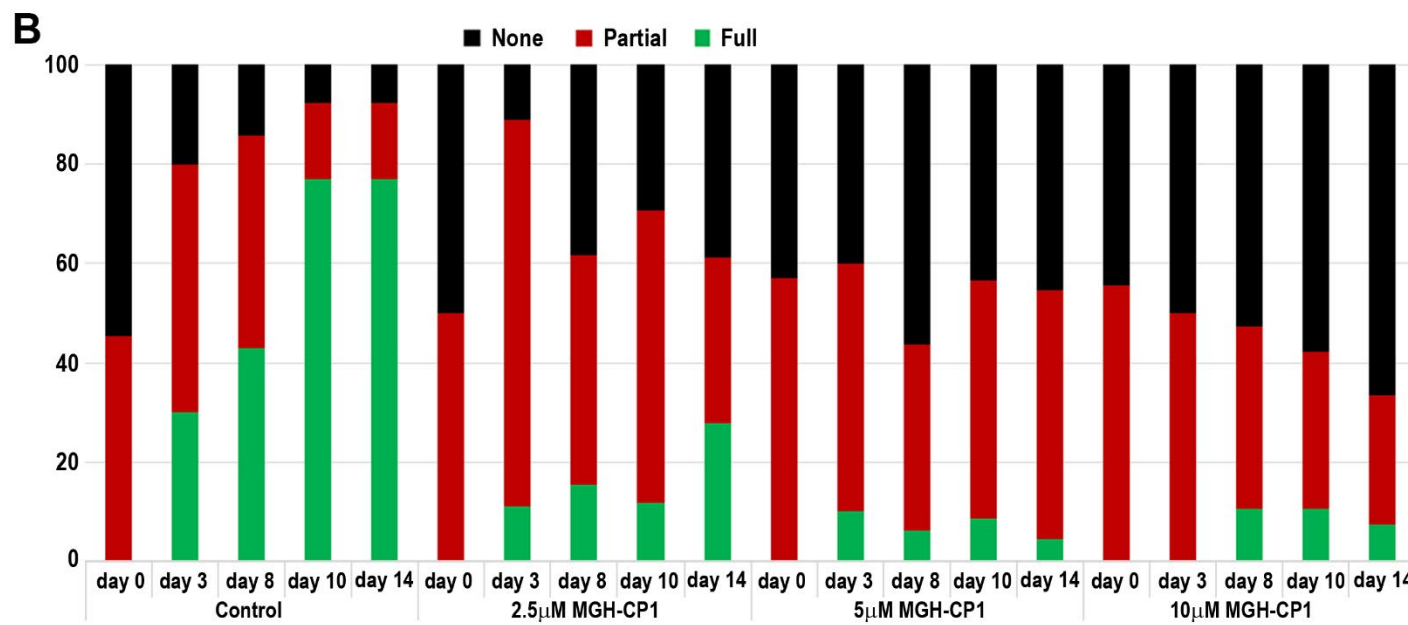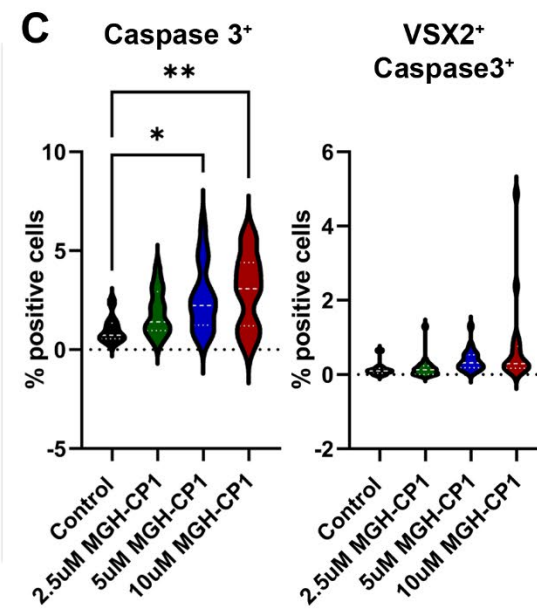

**Figure S10. Application of TEAD inhibitor (MGH-CP1) results in loss of retinal lamination.** **A)** Bright field microphotographs showing the presence of retinal organoids with full, partial or no bright phase retinal neuroepithelium at days 0, 3, 8, 10 and 14 post application. Scale bars = 100  $\mu$ M. **B)** Bar chart showing the percentage of organoids with full, partial or no bright phase retinal neuroepithelium for all the drug concentrations at days 0, 3, 8, 10 and 14 post application. **C)** Violin plot showing a small but significant increase in the percentage of Caspase 3+ apoptotic cells in retinal organoids treated with 10  $\mu$ M MGH-CP1. No significant difference across the conditions was observed for VSX2+Caspase 3+ cells. Data presented as median and quartiles. 9 – 39 retinal organoids per condition were used as shown in the Source Data file. One-way ANOVA with Dunnett's multiple comparisons test (\*  $p < 0.05$ ; \*\* $p < 0.01$ ). Source data are provided as a Source Data file.

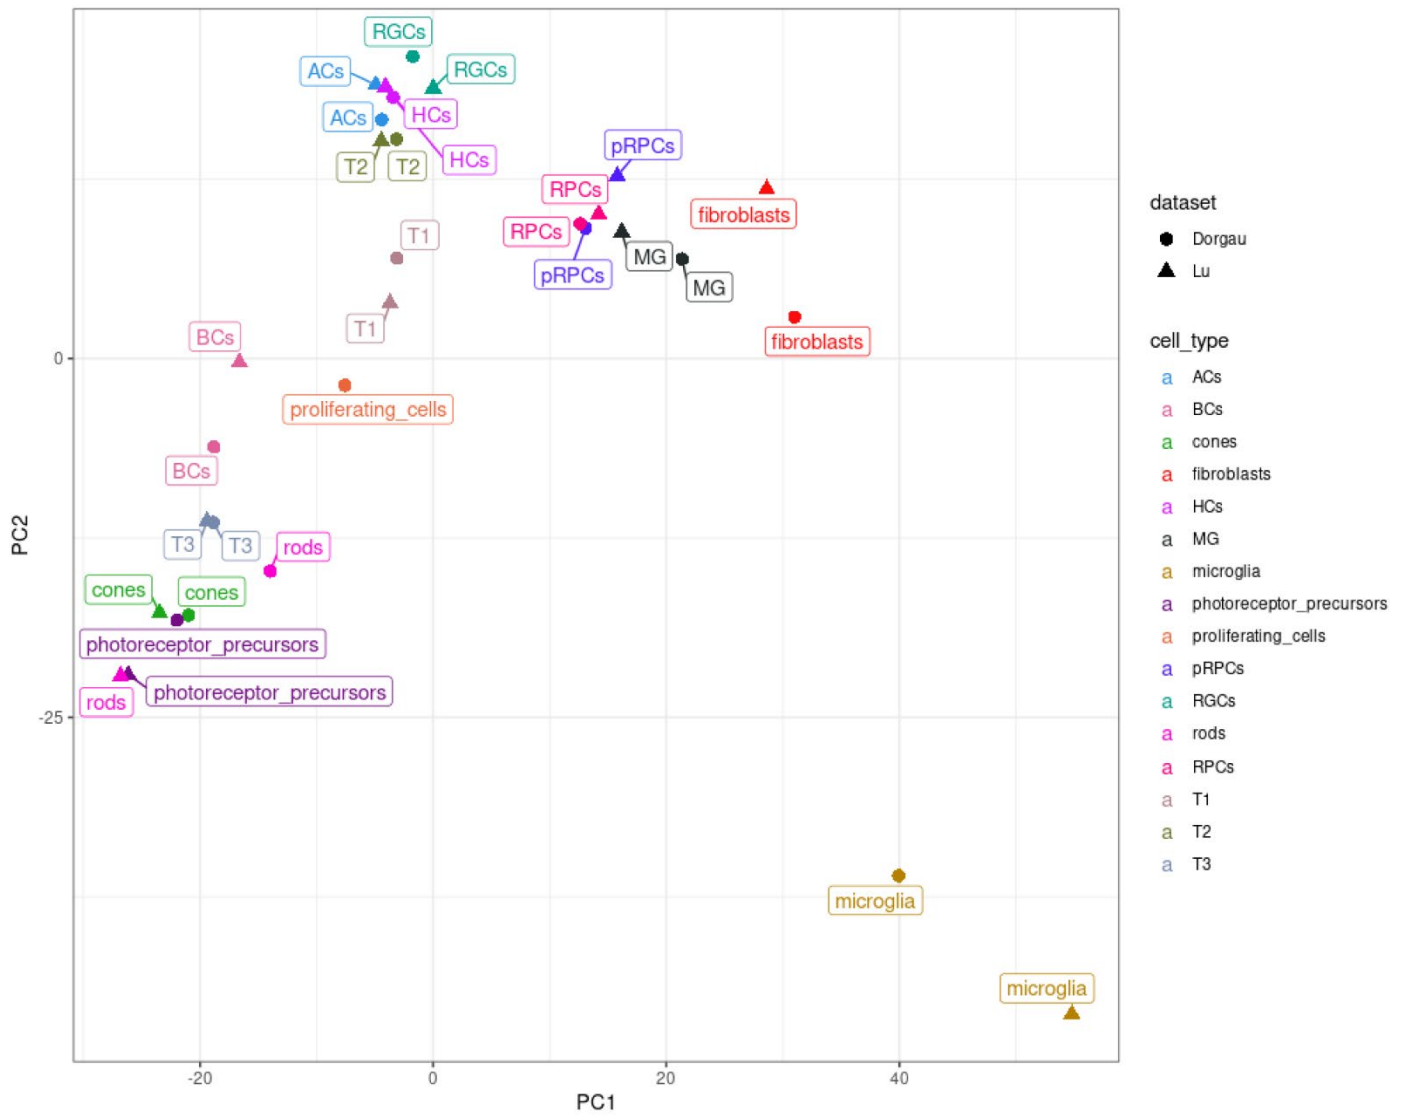

**Figure S11.** A comparison between scRNA-Seq retinal data generated here and previously published data scRNA-Seq retina data from Lu et al., 2020<sup>5</sup>. The analysis shows distribution of pseudo-bulk RNA-Seq created from each cell type and each dataset plotted in a reduced-dimensional space based on their principal components. Each point represents a pseudo-bulk sample for a specific cell type, and the distance and direction between points reflect the variance and correlation structure in the original data.
