# Supplementary material for: Single-cell analyses reveal transient retinal progenitor cells in the ciliary margin of developing human retina
Source: Nat Commun. 2024 Apr 26;15:3567. doi: 10.1038/s41467-024-47933-x (PMC11053058; doi:10.1038/s41467-024-47933-x)
Supplement: Supplementary file 9 — Supplementary Data 6 [file 41467_2024_47933_MOESM9_ESM.xlsx]

## Sheet: shared_DA_peaks_celltype_cellra
p_val	avg_log2FC	pct.1	pct.2	p_val_adj	cluster	DA_peak	Cellranger_gene	Cellranger_distance	Cellranger_peak_type
0	0.659236	0.484	0.084	0	rods	chr17-81654950-81657564	PDE6G	0	promoter
0	0.658664	0.63	0.162	0	rods	chr15-71803729-71815578	NR2E3	0	promoter
0	0.641452	0.54	0.12	0	rods	chr1-22610391-22615185	C1QA	-21321	distal
0	0.613863	0.5	0.105	0	rods	chr20-31693382-31695432	BCL2L1	27166	distal
0	0.595001	0.317	0.044	0	rods	chr7-131585862-131588817	PODXL	-29253	distal
0	0.570786	0.465	0.106	0	rods	chr17-9916274-9919826	RCVRN	-10653	distal
0	0.568742	0.668	0.209	0	rods	chr12-6838745-6844569	GNB3	0	promoter
0	0.559862	0.398	0.083	0	rods	chr17-6425252-6430893	AIPL1	4228	distal
0	0.552588	0.421	0.093	0	rods	chr20-4633972-4638293	PRNP	-47943	distal
0	0.551603	0.376	0.077	0	rods	chr5-10482628-10487325	ROPN1L	40753	distal
0	0.551576	0.474	0.115	0	rods	chr15-88484436-88486208	MRPS11	16719	distal
0	0.55125	0.384	0.081	0	rods	chr1-44042835-44045558	SLC6A9	-11449	distal
0	0.546767	0.347	0.063	0	rods	chr8-142009408-142011607			intergenic
0	0.546347	0.356	0.069	0	rods	chr19-3774033-3776258	RAX2	-1812	distal
0	0.544377	0.574	0.178	0	rods	chr17-9894367-9908665	RCVRN	0	promoter
0	0.531148	0.373	0.08	0	rods	chr19-3334700-3337797	NFIC	20298	distal
0	0.528683	0.435	0.106	0	rods	chr1-22582045-22587712	EPHA8	18482	distal
0	0.525352	0.354	0.074	0	rods	chr16-20865641-20868211	DCUN1D3	770	distal
0	0.525187	0.614	0.202	0	rods	chr19-47819171-47827422	CRX	0	promoter
0	0.522338	0.489	0.134	0	rods	chr19-47846752-47850747	CRX	24789	distal
0	0.522013	0.403	0.092	0	rods	chr19-2659425-2660934	GNG7	41776	distal
0	0.522004	0.269	0.041	0	rods	chr6-37360679-37362822	RNF8	6589	distal
0	0.519104	0.234	0.03	0	rods	chr6-42719577-42723336	PRPH2	0	promoter
0	0.516195	0.331	0.068	0	rods	chr12-5921406-5925948	ANO2	19312	distal
0	0.515288	0.353	0.076	0	rods	chr16-20609957-20615415	ACSM2B	-33590	distal
0	0.513176	0.371	0.082	0	rods	chr11-72307635-72309951	PHOX2A	-63459	distal
0	0.512793	0.271	0.044	0	rods	chr6-42694639-42696157	PRPH2	26418	distal
0	0.511609	0.243	0.035	0	rods	chr8-126516751-126519449	FAM84B	38945	distal
0	0.509754	0.298	0.055	0	rods	chr15-70189680-70194164	TLE3	-91504	distal
0	0.509712	0.377	0.087	0	rods	chr11-120746530-120749731	GRIK4	182097	distal
0	0.508748	0.412	0.101	0	rods	chr16-87347221-87354433	RP11-178L8.4	-12948	distal
0	0.507044	0.423	0.113	0	rods	chr14-99751247-99757072	EML1	-15877	distal
0	0.505446	0.24	0.035	0	rods	chr16-606347-607367	RAB40C	16259	distal
0	0.505055	0.27	0.046	0	rods	chr2-29045904-29048133	C2orf71	26129	distal
0	0.503908	0.597	0.195	0	rods	chr17-3876364-3880665	CAMKK1	10079	distal
0	0.500472	0.262	0.047	0	rods	chr19-31517387-31519994	TSHZ3	-167840	distal
0	0.500192	0.219	0.029	0	rods	chr3-52636419-52637742	PBRM1	41972	distal
0	0.499933	0.399	0.097	0	rods	chr9-134491131-134494039	COL5A1	-147735	distal
0	0.498675	0.34	0.073	0	rods	chr6-106063016-106067307	PRDM1	-19013	distal
0	0.497608	0.522	0.164	0	rods	chr2-120520967-120524465	INHBB	174825	distal
0	0.496597	0.228	0.034	0	rods	chr18-45853817-45854877	SIGLEC15	24727	distal
0	0.496441	0.326	0.07	0	rods	chr4-163987951-163989701	2001-03-01	-133773	distal
0	0.496419	0.341	0.076	0	rods	chr19-47797560-47799768	TPRX1	3791	distal
0	0.492245	0.255	0.043	0	rods	chr13-97850567-97851977	IPO5	-101698	distal
0	0.491531	0.261	0.045	0	rods	chr5-71880126-71884205	CARTPT	160964	distal
0	0.489549	0.24	0.037	0	rods	chr19-48028698-48030764	CABP5	13290	distal
0	0.489042	0.312	0.066	0	rods	chr17-50500667-50503530	MYCBPAP	-4854	distal
0	0.488794	0.381	0.096	0	rods	chr1-6948046-6951174	CAMTA1	162529	distal
0	0.488782	0.445	0.119	0	rods	chr17-57867882-57871068	MRPS23	-17826	distal
0	0.488589	0.545	0.177	0	rods	chr10-47345526-47362592	RBP3	0	promoter
0	0.488455	0.377	0.095	0	rods	chr5-134508652-134512851	JADE2	-12806	distal
0	0.48827	0.298	0.06	0	rods	chr12-6845102-6848902	CDCA3	2348	distal
0	0.487719	0.326	0.073	0	rods	chr17-74329762-74333661	KIF19	3551	distal
0	0.487566	0.357	0.087	0	rods	chr7-73984780-73986955	ELN	-40834	distal
0	0.487301	0.205	0.026	0	rods	chr5-160347675-160348691	C1QTNF2	21951	distal
0	0.487116	0.311	0.068	0	rods	chr12-2171064-2173856	CACNA1C	117502	distal
0	0.486224	0.24	0.038	0	rods	chr5-94498526-94500790	SLF1	-117557	distal
0	0.484509	0.274	0.05	0	rods	chr3-68983485-68987318	EOGT	-6328	distal
0	0.483104	0.281	0.054	0	rods	chr1-204143348-204147277	ETNK2	-2086	distal
0	0.480496	0.626	0.239	0	rods	chr8-142209612-142221584	TSNARE1	133180	distal
0	0.480426	0.404	0.111	0	rods	chr22-30389972-30394058	RNF215	-2584	distal
0	0.479506	0.284	0.057	0	rods	chr21-33699811-33701582	ITSN1	-17228	distal
0	0.476813	0.272	0.055	0	rods	chr1-202795818-202799778	KDM5B	8641	distal
0	0.476711	0.25	0.045	0	rods	chr19-34870244-34872600	ZNF30	-54303	distal
0	0.475554	0.262	0.049	0	rods	chr14-102240605-102242852	MOK	0	promoter
0	0.474215	0.211	0.031	0	rods	chr2-32788127-32789243	LTBP1	-157729	distal
0	0.473369	0.274	0.054	0	rods	chr5-10508824-10510469	ANKRD33B	-53999	distal
0	0.473315	0.308	0.068	0	rods	chr20-60875259-60878017			intergenic
0	0.471034	0.265	0.051	0	rods	chr12-124231713-124233207	FAM101A	-55957	distal
0	0.470574	0.453	0.14	0	rods	chr4-620709-631301	PDE6B	0	promoter
0	0.467441	0.207	0.03	0	rods	chr21-37530572-37532051	DYRK1A	110198	distal
0	0.467391	0.221	0.035	0	rods	chr15-74563713-74566736	ARID3B	22508	distal
0	0.466542	0.225	0.035	0	rods	chr13-99594027-99595246	CLYBL	-11423	distal
0	0.466533	0.221	0.034	0	rods	chr2-233306950-233308401	SAG	0	promoter
0	0.466334	0.272	0.055	0	rods	chr20-42259778-42263008			intergenic
0	0.466295	0.181	0.02	0	rods	chr19-48043585-48045316	CABP5	0	promoter
0	0.466145	0.23	0.039	0	rods	chr6-129859003-129862505	TMEM244	0	promoter
0	0.46579	0.26	0.051	0	rods	chr7-5176549-5178074	WIPI2	-12114	distal
0	0.465339	0.482	0.155	0	rods	chr1-41326950-41331905	FOXO6	-30026	distal
0	0.465147	0.225	0.04	0	rods	chr2-189479562-189480781	WDR75	38070	distal
0	0.463557	0.217	0.035	0	rods	chr16-84508424-84510156	TLDC1	-3666	distal
0	0.463371	0.301	0.068	0	rods	chr8-54592606-54594155	RP1	-21912	distal
0	0.463172	0.278	0.058	0	rods	chr14-92430223-92432056	RIN3	-81718	distal
0	0.461913	0.187	0.024	0	rods	chr19-34841608-34842506	ZNF599	-68379	distal
0	0.461868	0.265	0.054	0	rods	chr19-4951089-4953738	KDM4B	-15375	distal
0	0.461522	0.383	0.106	0	rods	chr17-7666603-7669224	TP53	6270	distal
0	0.46122	0.388	0.103	0	rods	chr3-195714200-195716160	MUC20	-4722	distal
0	0.459634	0.315	0.078	0	rods	chr15-89758261-89762018	MESP2	0	promoter
0	0.459415	0.26	0.053	0	rods	chr17-43409258-43410709	ARL4D	10300	distal
0	0.458457	0.349	0.092	0	rods	chr16-85723580-85726600	C16orf74	-12730	distal
0	0.458145	0.381	0.104	0	rods	chr4-1177255-1179510	SPON2	-4044	distal
0	0.456959	0.235	0.044	0	rods	chr11-67453985-67456799	CABP4	0	promoter
0	0.456668	0.249	0.048	0	rods	chr17-43406417-43407794	ARL4D	7459	distal
0	0.455935	0.245	0.047	0	rods	chr9-129087214-129088425	DOLPP1	6104	distal
0	0.455728	0.297	0.069	0	rods	chr17-79847942-79852138	CBX4	-8513	distal
0	0.455643	0.244	0.046	0	rods	chr1-231611233-231614539	DISC1	-12276	distal
0	0.455004	0.283	0.06	0	rods	chr3-45543865-45549068	LIMD1	-45256	distal
0	0.454842	0.322	0.08	0	rods	chr7-129749734-129752294	NRF1	119657	distal
0	0.454211	0.324	0.082	0	rods	chr16-792499-796430	CHTF18	3875	distal
0	0.454047	0.293	0.068	0	rods	chr7-748479-752065	DNAAF5	-16410	distal
0	0.453936	0.253	0.049	0	rods	chr1-9504598-9506210	SLC25A33	-33272	distal
0	0.453247	0.212	0.034	0	rods	chr19-56905311-56906442	ZIM2	-64582	distal
0	0.453124	0.316	0.076	0	rods	chr19-12973548-12976771	DAND5	4067	distal
0	0.452816	0.185	0.025	0	rods	chr18-13716346-13718023	FAM210A	8538	distal
0	0.452738	0.292	0.067	0	rods	chr19-47836039-47846094	CRX	14076	distal
0	0.452365	0.314	0.077	0	rods	chr6-34088964-34093148	GRM4	9004	distal
0	0.451963	0.192	0.027	0	rods	chr8-35534941-35536779	UNC5D	-7613	distal
0	0.451488	0.323	0.081	0	rods	chr19-3691287-3695011	PIP5K1C	5380	distal
0	0.451348	0.27	0.058	0	rods	chr2-237994630-237995841	UBE2F	25838	distal
0	0.451047	0.216	0.037	0	rods	chr8-23764247-23765746	NKX2-6	-57649	distal
0	0.45083	0.336	0.09	0	rods	chr3-111711841-111714673	PHLDB2	-17824	distal
0	0.450733	0.482	0.157	0	rods	chr1-9839946-9845522	CLSTN1	-15420	distal
0	0.450153	0.468	0.158	0	rods	chr10-47173843-47177938	GDF10	-122448	distal
0	0.450019	0.182	0.023	0	rods	chr16-4824496-4826191	GLYR1	21075	distal
0	0.448214	0.225	0.043	0	rods	chr18-49759056-49760464	ACAA2	52579	distal
0	0.448089	0.221	0.039	0	rods	chr11-115627270-115628456	CADM1	-122705	distal
0	0.448007	0.211	0.035	0	rods	chr6-17845355-17846385	NUP153	-138521	distal
0	0.447988	0.166	0.019	0	rods	chr22-41298438-41299569	ZC3H7B	-1953	distal
0	0.447881	0.23	0.044	0	rods	chr15-65110290-65111655	UBAP1L	3543	distal
0	0.447216	0.531	0.195	0	rods	chr17-63522425-63532211	KCNH6	0	promoter
0	0.446788	0.213	0.038	0	rods	chr9-134027678-134030237	RP11-374P20.5	0	promoter
0	0.446012	0.488	0.17	0	rods	chr1-205480936-205486273	CDK18	-18322	distal
0	0.444883	0.21	0.037	0	rods	chr5-171986402-171987580	FBXW11	19061	distal
0	0.444204	0.23	0.045	0	rods	chr9-96858637-96860617	ZNF782	-4149	distal
0	0.443829	0.135	0.009	0	rods	chr1-186460117-186461677	PDC	0	promoter
0	0.443401	0.278	0.065	0	rods	chr15-60702739-60705203	RORA	-75276	distal
0	0.443017	0.222	0.039	0	rods	chr11-116477087-116479565			intergenic
0	0.442427	0.157	0.017	0	rods	chr6-110843509-110844410	CDK19	-27872	distal
0	0.442337	0.477	0.158	0	rods	chr9-120918623-120922339	TRAF1	-4051	distal
0	0.442156	0.236	0.045	0	rods	chr15-90279763-90281144	RP11-697E2.12	13447	distal
0	0.440884	0.179	0.024	0	rods	chr16-26005128-26006053			intergenic
0	0.440706	0.171	0.021	0	rods	chr11-123342376-123345981	GRAMD1B	-12447	distal
0	0.440632	0.32	0.081	0	rods	chr15-70338438-70341010			intergenic
0	0.440328	0.275	0.064	0	rods	chr19-38068524-38069744	DPF1	153555	distal
0	0.439791	0.653	0.313	0	rods	chr19-3760942-3772885	APBA3;MRPL54;RAX2	0	promoter
0	0.439649	0.342	0.094	0	rods	chr18-58114390-58120519	NEDD4L	-28814	distal
0	0.439033	0.232	0.046	0	rods	chr15-88476322-88478193	MRPS11	8605	distal
0	0.438874	0.325	0.085	0	rods	chr10-84184155-84186567	CDHR1	-8068	distal
0	0.438818	0.458	0.157	0	rods	chr1-928462-934170	SAMD11	2722	distal
0	0.438675	0.211	0.037	0	rods	chr12-110812809-110815278	CCDC63	-31682	distal
0	0.438344	0.258	0.057	0	rods	chr7-123664833-123667281	LMOD2	8965	distal
0	0.438069	0.242	0.052	0	rods	chr15-72315540-72317031	CELF6	2852	distal
0	0.438068	0.288	0.069	0	rods	chr17-2421510-2423988	MNT	-20392	distal
0	0.437753	0.206	0.037	0	rods	chr9-131386570-131387952	PRRC2B	-6141	distal
0	0.43752	0.221	0.041	0	rods	chr22-29503204-29504748	NEFH	22975	distal
0	0.437321	0.387	0.122	0	rods	chr11-61494184-61497041	PPP1R32	5147	distal
0	0.437023	0.2	0.032	0	rods	chr19-48010282-48011332	ELSPBP1	1634	distal
0	0.437004	0.213	0.038	0	rods	chr13-90612613-90614441			intergenic
0	0.436934	0.29	0.069	0	rods	chr1-10253248-10255213	KIF1B	20920	distal
0	0.43649	0.166	0.022	0	rods	chr20-2059147-2060056	STK35	-41555	distal
0	0.436448	0.201	0.034	0	rods	chr14-68264049-68265515			intergenic
0	0.435751	0.473	0.166	0	rods	chr2-96151388-96156157	DUSP2	-5948	distal
0	0.435617	0.199	0.034	0	rods	chr3-142251554-142252797	GK5	-25947	distal
0	0.435083	0.217	0.04	0	rods	chr11-119155994-119157989	ABCG4	6099	distal
0	0.435023	0.323	0.087	0	rods	chr1-178650664-178653120	RALGPS2	-72027	distal
0	0.43479	0.324	0.086	0	rods	chr12-132464725-132467819	FBRSL1	-21732	distal
0	0.432954	0.216	0.039	0	rods	chr15-22987684-22991275	CYFIP1	-7332	distal
0	0.432842	0.206	0.037	0	rods	chr1-154665797-154667004	ADAR	-37833	distal
0	0.432611	0.243	0.049	0	rods	chr9-136216793-136221479	LHX3	-11665	distal
0	0.432301	0.283	0.067	0	rods	chr7-74642007-74644103	GTF2I	-13582	distal
0	0.432164	0.381	0.122	0	rods	chr15-73938878-73946913	LOXL1	12421	distal
0	0.431716	0.164	0.021	0	rods	chr17-66753024-66754130	CACNG5	-80987	distal
0	0.431433	0.299	0.077	0	rods	chr14-56729012-56731916	OTX2	73733	distal
0	0.431128	0.337	0.093	0	rods	chr1-110148918-110155004	SLC6A17	0	promoter
0	0.431077	0.237	0.051	0	rods	chr7-142231475-142232855	PRSS58	25173	distal
0	0.42976	0.375	0.113	0	rods	chr17-32297982-32300251	RHBDL3	30179	distal
0	0.429644	0.224	0.046	0	rods	chr3-52467817-52469850	NISCH	12201	distal
0	0.429301	0.262	0.062	0	rods	chr5-1251520-1255017	SLC6A18	26166	distal
0	0.429244	0.294	0.075	0	rods	chr15-68681635-68683136	CORO2B	49648	distal
0	0.428981	0.259	0.061	0	rods	chr5-174090101-174093585	HMP19	44358	distal
0	0.428746	0.229	0.046	0	rods	chr1-165569710-165572013	LRRC52	25704	distal
0	0.428681	0.312	0.086	0	rods	chr6-27770700-27774422	HIST1H2BL	33510	distal
0	0.428441	0.623	0.274	0	rods	chr9-136189126-136206161	LHX3	0	promoter
0	0.428323	0.412	0.139	0	rods	chr17-50941948-50945540	TOB1	-73970	distal
0	0.428214	0.217	0.041	0	rods	chr5-151934859-151936180	GLRA1	-10017	distal
0	0.428076	0.183	0.03	0	rods	chr3-11033926-11035309	SLC6A1	16796	distal
0	0.427989	0.37	0.112	0	rods	chr18-79924045-79929143	PQLC1	22496	distal
0	0.427897	0.331	0.093	0	rods	chr7-74627160-74628848	GTF2I	-28837	distal
0	0.427352	0.198	0.033	0	rods	chr1-168741659-168743772	DPT	-12395	distal
0	0.426519	0.275	0.067	0	rods	chr5-10524126-10525396	ANKRD33B	-39072	distal
0	0.42642	0.305	0.082	0	rods	chr11-134052721-134054962	JAM3	-13963	distal
0	0.425501	0.14	0.015	0	rods	chr11-131476067-131477247	NTM	105590	distal
0	0.424749	0.213	0.041	0	rods	chr2-54637849-54642334	SPTBN1	79456	distal
0	0.424308	0.251	0.058	0	rods	chr10-128440020-128441188			intergenic
0	0.424234	0.305	0.082	0	rods	chr19-902499-904740	R3HDM4	8418	distal
0	0.424142	0.174	0.027	0	rods	chr15-42538951-42540438	LRRC57	8335	distal
0	0.423319	0.218	0.042	0	rods	chr2-99523366-99524863	REV1	-33331	distal
0	0.423104	0.212	0.041	0	rods	chr19-44684551-44685711	CEACAM19	12830	distal
0	0.42235	0.188	0.031	0	rods	chr11-8693565-8694901	RPL27A	9307	distal
0	0.422163	0.13	0.011	0	rods	chr6-10819817-10820713	MAK	10167	distal
0	0.421644	0.297	0.08	0	rods	chr7-2382157-2385357	CHST12	-18203	distal
0	0.421364	0.366	0.113	0	rods	chr2-42058925-42062397	PKDCC	10906	distal
0	0.421271	0.35	0.102	0	rods	chr1-84713951-84716514	SSX2IP	-23406	distal
0	0.420924	0.235	0.051	0	rods	chr3-43092865-43095742	POMGNT2	10198	distal
0	0.420873	0.184	0.029	0	rods	chr9-97406037-97407132	TDRD7	-4818	distal
0	0.420568	0.415	0.138	0	rods	chr1-44035089-44037715	SLC6A9	-3703	distal
0	0.420265	0.164	0.024	0	rods	chr11-57629585-57630663	YPEL4	16854	distal
0	0.420182	0.471	0.164	0	rods	chr1-53112774-53118191	SLC1A7	24387	distal
0	0.419262	0.183	0.031	0	rods	chr18-48049366-48050840	ZBTB7C	86522	distal
0	0.419157	0.468	0.169	0	rods	chr6-136321679-136327877	BCLAF1	-31828	distal
0	0.418987	0.202	0.037	0	rods	chr6-96911963-96914577	KLHL32	-10043	distal
0	0.418973	0.134	0.012	0	rods	chr10-97545078-97546096	ANKRD2	-26403	distal
0	0.418837	0.144	0.015	0	rods	chr11-61366889-61368350	TMEM138	1187	distal
0	0.418402	0.248	0.058	0	rods	chr22-29772082-29773693	UQCR10	4709	distal
0	0.41805	0.572	0.232	0	rods	chr1-110170408-110179051	SLC6A17	19923	distal
0	0.417872	0.355	0.108	0	rods	chr1-201267696-201271494	PKP1	-11958	distal
0	0.417568	0.168	0.024	0	rods	chr4-13445506-13446796	RAB28	37570	distal
0	0.417243	0.26	0.06	0	rods	chr9-38079248-38080484	SHB	-10037	distal
0	0.416526	0.2	0.039	0	rods	chr19-5823382-5825856	NRTN	0	promoter
0	0.416164	0.553	0.227	0	rods	chr16-88766985-88771735	PIEZO1	13486	distal
0	0.416099	0.203	0.039	0	rods	chr7-133796303-133798567			intergenic
0	0.416072	0.353	0.105	0	rods	chr19-7616449-7621036	XAB2	8530	distal
0	0.416027	0.156	0.02	0	rods	chr19-35835201-35836275	NPHS1	15563	distal
0	0.415962	0.188	0.033	0	rods	chr16-51757117-51758497			intergenic
0	0.415716	0.231	0.05	0	rods	chr12-14797213-14798816	WBP11	4725	distal
0	0.415304	0.326	0.091	0	rods	chr7-45291624-45296180	RAMP3	133796	distal
0	0.414835	0.335	0.101	0	rods	chr6-35508744-35513439	TULP1	0	promoter
0	0.414666	0.381	0.118	0	rods	chr9-114367745-114373433	AKNA	3532	distal
0	0.41458	0.253	0.065	0	rods	chr10-132792865-132797490	NKX6-2	-6813	distal
0	0.413533	0.344	0.106	0	rods	chr17-80426559-80428994	ENDOV	10891	distal
0	0.413217	0.217	0.045	0	rods	chr1-45796549-45798736	MAST2	-4877	distal
0	0.412624	0.297	0.084	0	rods	chr16-87319702-87327468	C16orf95	-2282	distal
0	0.412571	0.256	0.063	0	rods	chr17-43401148-43404601	ARL4D	2190	distal
0	0.411077	0.148	0.017	0	rods	chr22-46162370-46163977	PPARA	10487	distal
0	0.411	0.147	0.019	0	rods	chr9-387391-388834	DOCK8	21141	distal
0	0.41065	0.3	0.085	0	rods	chr13-113663806-113670539	GRK1	0	promoter
0	0.410248	0.255	0.064	0	rods	chr1-47490951-47492391	FOXD2	54935	distal
0	0.409935	0.298	0.081	0	rods	chr11-117456944-117460888	CEP164	129090	distal
0	0.40971	0.211	0.048	0	rods	chr15-99446403-99448471	MEF2A	-117229	distal
0	0.409478	0.293	0.078	0	rods	chr1-53132998-53136243	SLC1A7	6335	distal
0	0.409476	0.213	0.044	0	rods	chr14-63470743-63472581	PPP2R5E	35658	distal
0	0.409346	0.173	0.027	0	rods	chr1-43716308-43717742	ST3GAL3	8468	distal
0	0.409163	0.153	0.021	0	rods	chr5-76487974-76489469	IQGAP2	-57940	distal
0	0.409026	0.155	0.021	0	rods	chr19-4115254-4116552	MAP2K2	7566	distal
0	0.409004	0.215	0.045	0	rods	chr8-133488795-133493523	ST3GAL1	78327	distal
0	0.408853	0.174	0.029	0	rods	chr4-165879055-165880503	TLL1	5316	distal
0	0.408764	0.302	0.087	0	rods	chr20-49383553-49386092	KCNB1	96585	distal
0	0.408396	0.185	0.033	0	rods	chr5-160253704-160255467	FABP6	24275	distal
0	0.408284	0.216	0.044	0	rods	chr15-52190410-52192073	GNB5	0	promoter
0	0.408069	0.225	0.05	0	rods	chr19-48985580-48987668	GYS1	5642	distal
0	0.407874	0.178	0.029	0	rods	chr20-35837212-35838298	PHF20	65230	distal
0	0.407812	0.139	0.015	0	rods	chr1-66525206-66526592	SGIP1	-6791	distal
0	0.407745	0.431	0.155	0	rods	chr10-129867048-129872951	EBF3	90891	distal
0	0.407594	0.196	0.038	0	rods	chr1-236691642-236693841	ACTN2	5135	distal
0	0.407405	0.156	0.021	0	rods	chr15-80324184-80325486	RP11-2E17.1	-71971	distal
0	0.407148	0.265	0.073	0	rods	chr7-1553481-1557067	TMEM184A	0	promoter
0	0.406859	0.4	0.134	0	rods	chr3-13109955-13114260	IQSEC1	-36838	distal
0	0.406549	0.266	0.073	0	rods	chr12-51887494-51891393	ANKRD33	0	promoter
0	0.406471	0.188	0.034	0	rods	chr16-77224003-77225994	SYCE1L	24607	distal
0	0.406279	0.328	0.101	0	rods	chr19-3478054-3485549	AC005787.5;SMIM24	0	promoter
0	0.40622	0.208	0.043	0	rods	chr9-123655546-123658414	DENND1A	18378	distal
0	0.405971	0.166	0.026	0	rods	chr19-13289090-13290051	IER2	137116	distal
0	0.405826	0.166	0.025	0	rods	chr1-1809164-1810190	NADK	-29095	distal
0	0.405319	0.362	0.116	0	rods	chr12-49983411-49985459	RACGAP1	6900	distal
0	0.404772	0.296	0.082	0	rods	chr3-127076039-127079641	PLXNA1	87446	distal
0	0.404604	0.352	0.11	0	rods	chr19-5572281-5573710	TINCR	-4247	distal
0	0.404223	0.147	0.018	0	rods	chr4-41159541-41161529	APBB2	52930	distal
0	0.404007	0.222	0.048	0	rods	chr2-148938271-148940556	KIF5C	63022	distal
0	0.403243	0.245	0.06	0	rods	chr10-103702442-103705333	SH3PXD2A	150074	distal
0	0.402969	0.135	0.015	0	rods	chr7-98311896-98313092	BRI3	30222	distal
0	0.402052	0.2	0.041	0	rods	chr2-69176932-69179254	ANTXR1	163536	distal
0	0.401916	0.39	0.135	0	rods	chr22-39359577-39366236	SYNGR1	0	promoter
0	0.401534	0.317	0.092	0	rods	chr12-53240901-53244909	RP11-624J6.2	0	promoter
0	0.401436	0.302	0.085	0	rods	chr9-136206732-136213626	LHX3	-1604	distal
0	0.40121	0.139	0.017	0	rods	chr12-127142720-127143756			intergenic
0	0.400673	0.306	0.093	0	rods	chr1-3247291-3252788	PRDM16	178081	distal
0	0.400111	0.187	0.035	0	rods	chr1-36556987-36558040	CSF3R	-73709	distal
0	0.399873	0.176	0.031	0	rods	chr18-13523818-13526128	LDLRAD4	-85336	distal
0	0.399648	0.193	0.037	0	rods	chr11-30381047-30382582	ARL14EP	57997	distal
0	0.399507	0.15	0.02	0	rods	chr5-147515216-147516090	DPYSL3	-5160	distal
0	0.399458	0.144	0.019	0	rods	chr5-80796692-80798018	DHFR	-141709	distal
0	0.39915	0.28	0.078	0	rods	chr1-2905180-2907424	TTC34	-103463	distal
0	0.398711	0.228	0.054	0	rods	chr15-76513455-76515330	ISL2	176732	distal
0	0.39852	0.152	0.021	0	rods	chr9-114391763-114393507	AKNA	899	distal
0	0.398008	0.344	0.106	0	rods	chr1-177901150-177903513	SEC16B	66403	distal
0	0.39695	0.183	0.034	0	rods	chr10-48251049-48252917	FRMPD2	0	promoter
0	0.396678	0.282	0.08	0	rods	chr9-137191669-137196229	SSNA1	2964	distal
0	0.396626	0.302	0.089	0	rods	chr1-9845952-9851182	CLSTN1	-21426	distal
0	0.396458	0.212	0.046	0	rods	chr16-54576185-54579449			intergenic
0	0.396181	0.192	0.039	0	rods	chr1-10850388-10852463	CASZ1	-53738	distal
0	0.396139	0.313	0.091	0	rods	chr9-98431946-98434312	TBC1D2	-176225	distal
0	0.395477	0.229	0.053	0	rods	chr5-113146700-113148378	MCC	86300	distal
0	0.395437	0.112	0.008	0	rods	chr1-27243332-27244144	WDTC1	8665	distal
0	0.395428	0.281	0.078	0	rods	chr22-44303766-44307374	KIAA1644	5478	distal
0	0.394769	0.656	0.32	0	rods	chr14-56793880-56813721	OTX2	0	promoter
0	0.394661	0.409	0.144	0	rods	chr12-124461105-124464922	NCOR2	30331	distal
0	0.394185	0.354	0.117	0	rods	chr1-155010302-155012911	ZBTB7B	-1537	distal
0	0.393684	0.175	0.032	0	rods	chr19-30601954-30603493			intergenic
0	0.393162	0.167	0.028	0	rods	chr3-169912773-169914654	SAMD7	1202	distal
0	0.392612	0.365	0.117	0	rods	chr1-26831498-26835133	ZDHHC18	4789	distal
0	0.392597	0.498	0.195	0	rods	chr3-12977997-12987965	IQSEC1	0	promoter
0	0.392375	0.453	0.178	0	rods	chr14-105174039-105183186	NUDT14	0	promoter
0	0.392218	0.211	0.048	0	rods	chr1-201941227-201942482	LMOD1	4106	distal
0	0.391824	0.214	0.048	0	rods	chr3-119637886-119639449	POPDC2	21142	distal
0	0.391018	0.21	0.046	0	rods	chr12-6758260-6760377	MLF2	-4705	distal
0	0.390819	0.193	0.039	0	rods	chr5-180154920-180156697	RASGEF1C	-16571	distal
0	0.390527	0.221	0.051	0	rods	chr12-55048085-55050405	NEUROD4	28141	distal
0	0.389557	0.432	0.156	0	rods	chr5-178990517-178998220	GRM6	0	promoter
0	0.388918	0.337	0.112	0	rods	chr3-13192451-13199962	IQSEC1	-119334	distal
0	0.388453	0.384	0.133	0	rods	chr1-154746941-154752148	KCNN3	107696	distal
0	0.38794	0.16	0.025	0	rods	chr22-35522967-35524294	RASD2	-16574	distal
0	0.387495	0.273	0.078	0	rods	chr11-123547225-123551716	GRAMD1B	-8546	distal
0	0.386527	0.447	0.17	0	rods	chr16-27720042-27726345	GSG1L	158226	distal
0	0.386233	0.119	0.011	0	rods	chr10-72234232-72235283	ASCC1	-17098	distal
0	0.38604	0.258	0.068	0	rods	chr21-39344380-39346895	HMGN1	2159	distal
0	0.385845	0.15	0.022	0	rods	chr11-117551424-117552956			intergenic
0	0.385826	0.236	0.062	0	rods	chr6-170432086-170435007	PSMB1	118335	distal
0	0.385807	0.525	0.227	0	rods	chr16-30027645-30032920	FAM57B	0	promoter
0	0.3858	0.204	0.046	0	rods	chr12-124807101-124808611	SCARB1	9097	distal
0	0.384554	0.326	0.106	0	rods	chr19-47788342-47791268	SEPW1	9642	distal
0	0.383135	0.442	0.177	0	rods	chr11-44956548-44965295	TP53I11	-5242	distal
0	0.382688	0.282	0.082	0	rods	chr2-85732469-85734582	ATOH8	-19312	distal
0	0.380543	0.294	0.087	0	rods	chr5-168425703-168428904	RARS	-57541	distal
0	0.379404	0.39	0.142	0	rods	chr1-94115602-94122231	ABCA4	0	promoter
0	0.378455	0.288	0.086	0	rods	chr14-56890849-56892230	OTX2	-80370	distal
0	0.378279	0.428	0.161	0	rods	chr8-10651998-10656375	RP1L1	0	promoter
0	0.376556	0.344	0.122	0	rods	chr11-117742217-117746999	DSCAML1	50093	distal
0	0.37627	0.432	0.171	0	rods	chr1-205255686-205263850	TMCC2	0	promoter
0	0.376112	0.112	0.011	0	rods	chr16-66256465-66257581	CDH5	-109041	distal
0	0.375592	0.368	0.132	0	rods	chr21-43937938-43946221	AGPAT3	-709	promoter
0	0.374774	0.284	0.086	0	rods	chr11-117518668-117525365	CEP164	190814	distal
0	0.374637	0.106	0.008	0	rods	chr19-56265569-56266654	EDDM13	-35336	distal
0	0.374632	0.5	0.211	0	rods	chr17-76465705-76475682	AANAT	0	promoter
0	0.374344	0.305	0.094	0	rods	chr15-52186321-52188099	GNB5	3271	distal
0	0.373981	0.551	0.26	0	rods	chr15-88603571-88618258	AEN	-3038	distal
0	0.373786	0.324	0.102	0	rods	chr1-201135735-201143726	ASCL5	-8551	distal
0	0.372951	0.389	0.144	0	rods	chr5-38256117-38259550	EGFLAM	0	promoter
0	0.372521	0.316	0.106	0	rods	chr19-33427881-33431302	CEBPG	53570	distal
0	0.371815	0.251	0.07	0	rods	chr3-133040287-133042255	TMEM108	1886	distal
0	0.371753	0.323	0.105	0	rods	chr9-37665818-37670969	FRMPD1	0	promoter
0	0.367822	0.324	0.109	0	rods	chr13-100299634-100301994			intergenic
0	0.366545	0.534	0.245	0	rods	chr4-8887465-8896976	HMX1	-15648	distal
0	0.364231	0.354	0.129	0	rods	chr12-124477304-124482494	NCOR2	12759	distal
0	0.363781	0.813	0.531	0	rods	chr3-51950852-51971748	GPR62;PCBP4	0	promoter
0	0.363635	0.358	0.127	0	rods	chr11-119366492-119369882	USP2	-2285	distal
0	0.358809	0.619	0.316	0	rods	chr19-17239715-17249725	NR2F6	0	promoter
0	0.355406	0.35	0.128	0	rods	chr19-8239920-8241589	CERS4	30550	distal
0	0.354676	0.693	0.379	0	rods	chr7-129763620-129787762	NRF1	133543	distal
0	0.352912	0.411	0.166	0	rods	chr17-75524270-75527329	LLGL2	0	promoter
0	0.352548	0.464	0.202	0	rods	chr19-3357153-3363067	NFIC	0	promoter
0	0.352078	0.492	0.222	0	rods	chr5-10562344-10570670	ANKRD33B	0	promoter
0	0.349748	0.398	0.164	0	rods	chr11-72589504-72596825	PDE2A	45607	distal
0	0.34916	0.493	0.227	0	rods	chr17-45017899-45024834	DCAKD	10308	distal
0	0.347946	0.396	0.158	0	rods	chr3-58517553-58523522	ACOX2	13762	distal
0	0.347155	0.387	0.151	0	rods	chr1-53119511-53126612	SLC1A7	15966	distal
0	0.346376	0.74	0.446	0	rods	chr19-4057510-4068958	ZBTB7A	0	promoter
0	0.345746	0.405	0.164	0	rods	chr10-3123711-3128917	PFKP	-90	promoter
0	0.339375	0.411	0.179	0	rods	chr2-70886370-70892727	VAX2	-7863	distal
0	0.33838	0.613	0.325	0	rods	chr2-218876356-218888735	WNT10A	0	promoter
0	0.33757	0.701	0.392	0	rods	chr14-24074234-24087456	NRL	0	promoter
0	0.335521	0.453	0.201	0	rods	chr17-59364345-59373576	YPEL2	19190	distal
0	0.334896	0.516	0.239	0	rods	chr15-78671170-78674061	CHRNB4	-29925	distal
0	0.328283	0.557	0.277	0	rods	chr3-50131373-50141398	SEMA3F	-13693	distal
0	0.327828	0.467	0.218	0	rods	chr17-2022462-2026648	RTN4RL1	0	promoter
0	0.327318	0.613	0.327	0	rods	chr19-40686742-40695097	NUMBL	0	promoter
0	0.327124	0.457	0.21	0	rods	chr6-33709629-33712399	UQCC2	0	promoter
0	0.326924	0.471	0.213	0	rods	chr16-66899287-66908536	CDH16	10313	distal
0	0.326919	0.503	0.249	0	rods	chr16-351388-354778	AXIN1	0	promoter
0	0.324427	0.522	0.261	0	rods	chr11-62610760-62615679	EML3;ROM1	0	promoter
0	0.323357	0.564	0.293	0	rods	chr2-120341061-120351155	INHBB	0	promoter
0	0.323023	0.614	0.335	0	rods	chr10-132406681-132427480	PWWP2B	9514	distal
0	0.317342	0.503	0.242	0	rods	chr1-10751028-10759838	CASZ1	36811	distal
0	0.314156	0.575	0.306	0	rods	chr1-156474798-156495166	MEF2D	0	promoter
0	0.301714	0.469	0.231	0	rods	chr17-176315-183559	DOC2B	0	promoter
0	0.299869	0.594	0.331	0	rods	chr17-58526451-58536974	2004-09-01	0	promoter
0	0.297281	0.743	0.481	0	rods	chr8-9893123-9909519	MSRA	-144749	distal
0	0.296614	0.536	0.276	0	rods	chr17-81063007-81077271	BAIAP2	-20847	distal
0	0.295977	0.433	0.214	0	rods	chr3-50187451-50196848	GNAT1	0	promoter
0	0.292129	0.47	0.236	0	rods	chr17-28544670-28553546	UNC119	0	promoter
0	0.290279	0.553	0.313	0	rods	chr12-125182668-125190191	AACS	117290	distal
0	0.288949	0.453	0.234	0	rods	chr20-49479330-49485107	KCNB1	0	promoter
0	0.28766	0.749	0.492	0	rods	chr8-141383040-141403326	PTP4A3	0	promoter
0	0.281689	0.693	0.444	0	rods	chr19-17946052-17954518	KCNN1	0	promoter
0	0.275274	0.693	0.439	0	rods	chr2-181677520-181687465	NEUROD1	0	promoter
0	0.270871	0.676	0.433	0	rods	chr16-1150108-1179446	CACNA1H	0	promoter
0	0.270711	0.659	0.419	0	rods	chr19-47269989-47276664	INAFM1	0	promoter
0	0.270228	0.713	0.479	0	rods	chr20-34703032-34714511	TP53INP2	0	promoter
0	0.255894	0.895	0.795	0	rods	chr16-85609603-85669259	GSE1	0	promoter
0	0.250919	0.704	0.481	0	rods	chr9-137239708-137248265	FAM166A;TUBB4B	0	promoter
4.94065645841247e-324	0.401327	0.179	0.032	1.87935160693323e-318	rods	chr20-31972097-31973428	XKR7	4096	distal
1.48219693752374e-323	0.392473	0.24	0.061	5.63805482079968e-318	rods	chr22-44308034-44310313	KIAA1644	2539	distal
3.45845952088873e-323	0.419285	0.199	0.038	1.31554612485326e-317	rods	chr5-152305279-152307127	NMUR2	98153	distal
5.92878775009496e-323	0.327031	0.407	0.178	2.25522192831987e-317	rods	chr1-43388190-43391094	MED8;SZT2	0	promoter
6.42285339593621e-323	0.386851	0.23	0.06	2.44315708901319e-317	rods	chr1-15415694-15420301	EFHD2	5800	distal
2.81617418129511e-322	0.380653	0.231	0.06	1.07123041595194e-316	rods	chrX-9875727-9879276	SHROOM2	-33158	distal
1.13635098543487e-321	0.256597	0.59	0.362	4.32250869594642e-316	rods	chr7-128404041-128410969	IMPDH1	0	promoter
1.45255299877326e-321	0.387568	0.156	0.024	5.52529372438368e-316	rods	chr5-159791157-159792900	ADRA1B	-123574	distal
3.82900875526966e-321	0.40946	0.162	0.025	1.45649749537325e-315	rods	chr11-57543528-57545346	SMTNL1	886	distal
7.09972333073871e-321	0.35242	0.277	0.09	2.70062825916305e-315	rods	chr11-44760098-44762285	TSPAN18	-2141	distal
1.60423115204653e-320	0.393769	0.186	0.036	6.10225466771218e-315	rods	chr10-102454618-102456627	C10orf95	-3075	distal
4.00840399127462e-319	0.37315	0.285	0.086	1.524736752221e-313	rods	chr14-75398944-75402495	JDP2	-25221	distal
4.06131842194421e-319	0.38904	0.193	0.039	1.54486460793125e-313	rods	chr5-146717991-146719814	PPP2R2B	158829	distal
4.66585714619556e-319	0.406504	0.205	0.044	1.7748220705556e-313	rods	chr1-1831620-1834510	NADK	-51551	distal
5.84499421656028e-319	0.395345	0.179	0.034	2.22334812506628e-313	rods	chr12-32252142-32253184	BICD1	144847	distal
5.18493733568575e-318	0.394331	0.155	0.023	1.97227238843483e-312	rods	chr7-157177066-157178216	UBE3C	37872	distal
9.22482813056983e-318	0.349613	0.389	0.155	3.50898624844681e-312	rods	chr8-66773883-66776132	SGK3	0	promoter
4.47477577546952e-317	0.387038	0.182	0.035	1.70213758335198e-311	rods	chr1-216422017-216423931	USH2A	0	promoter
1.3288654923798e-316	0.35855	0.288	0.097	5.0548050031889e-311	rods	chr12-54191154-54194378	SMUG1	-2160	distal
6.78557332024719e-316	0.300756	0.511	0.273	2.58113030742223e-310	rods	chr22-49851410-49857363	ZBED4	0	promoter
2.96710046052787e-315	0.396699	0.203	0.043	0	rods	chr21-45645665-45648467	PCBP3	1972	distal
3.13174428961313e-315	0.363728	0.323	0.111	0	rods	chr7-157148918-157152916	UBE3C	9724	distal
3.28669734713854e-315	0.360692	0.316	0.102	0	rods	chr1-53138733-53144214	SLC1A7	0	promoter
3.57636452248852e-315	0.345581	0.244	0.073	0	rods	chr10-122507686-122509912	HTRA1	46162	distal
4.45788395265563e-315	0.409273	0.202	0.04	0	rods	chr9-114509653-114511658	DFNB31	-4203	distal
1.14547727217237e-314	0.377572	0.254	0.069	0	rods	chr8-34334670-34336734			intergenic
2.63968772664203e-314	0.314642	0.414	0.194	0	rods	chr22-30324541-30328124	TBC1D10A	0	promoter
3.61897749719145e-314	0.374722	0.236	0.064	0	rods	chr13-23629263-23632535	TNFRSF19	49884	distal
4.36168654337858e-314	0.385171	0.207	0.047	0	rods	chr2-48450659-48453674	PPP1R21	9863	distal
2.01946982758831e-313	0.410014	0.177	0.03	7.68176e-308	rods	chr6-107705947-107707380	SCML4	25016	distal
2.61522890259681e-313	0.407415	0.123	0.011	9.94794e-308	rods	chr3-119224713-119225408	B4GALT4	4646	distal
4.13629586731365e-313	0.399332	0.204	0.043	1.57338e-307	rods	chr12-55062820-55063906	NEUROD4	42876	distal
4.99489561637941e-313	0.367027	0.236	0.063	1.89998e-307	rods	chr15-42130679-42133191	PLA2G4F	23446	distal
5.56732866273529e-313	0.351285	0.359	0.131	2.11773e-307	rods	chr11-116370805-116374506			intergenic
5.58915127274989e-313	0.399307	0.176	0.032	2.12603e-307	rods	chr22-36573611-36574675	EIF3D	-44175	distal
1.29297146190688e-312	0.394096	0.202	0.042	4.91827e-307	rods	chr21-34189012-34191362	SLC5A3	115443	distal
1.43988621577008e-312	0.413137	0.205	0.04	5.47711e-307	rods	chr1-111793502-111795948	DDX20	33106	distal
6.83075613572264e-312	0.406341	0.23	0.054	2.59832e-306	rods	chr1-36764183-36766898			intergenic
1.35902699365632e-311	0.389018	0.251	0.067	5.16953e-306	rods	chr19-2443978-2448114	LMNB2	8883	distal
2.11449012449676e-311	0.375402	0.14	0.021	8.0432e-306	rods	chr21-39336266-39337115	HMGN1	11939	distal
4.87326911897118e-311	0.359298	0.265	0.08	1.85372e-305	rods	chr8-8972852-8974436	ERI1	-27711	distal
5.82524678147748e-311	0.349291	0.29	0.096	2.21584e-305	rods	chr20-25544060-25553015	NINL	32503	distal
1.22611581576822e-310	0.403007	0.225	0.052	4.66396e-305	rods	chr3-100269027-100270635	TBC1D23	8016	distal
8.67626378632565e-310	0.362775	0.228	0.062	3.30032e-304	rods	chr11-45592020-45593601	CHST1	72022	distal
0	0.392361	0.189	0.037	1.29888e-303	rods	chr4-37614817-37616836	C4orf19	30585	distal
0	0.332187	0.366	0.148	3.90541e-303	rods	chr10-97071200-97079935	LCOR	89917	distal
0	0.393948	0.203	0.044	4.01986e-303	rods	chr22-38166921-38168498	PLA2G6	13257	distal
0	0.371257	0.12	0.015	5.69113e-303	rods	chr21-39438738-39439543	LCA5L	6191	distal
0	0.381695	0.175	0.034	7.62225e-303	rods	chr4-16110548-16111628	PROM1	-26170	distal
0	0.376702	0.261	0.074	8.12755e-303	rods	chr16-26991335-26993575			intergenic
2.31631e-308	0.388904	0.179	0.035	8.81088e-303	rods	chr16-28218057-28219937	XPO6	-6188	distal
6.39997e-308	0.369508	0.197	0.045	2.43445e-302	rods	chr3-140276440-140279699			intergenic
7.69257e-308	0.259335	0.534	0.312	2.92614e-302	rods	chr20-34557630-34563937	MAP1LC3A	0	promoter
1.46523e-307	0.380532	0.207	0.047	5.57352e-302	rods	chr17-14358433-14360200	HS3ST3B1	57351	distal
1.89403e-307	0.378214	0.24	0.063	7.20462e-302	rods	chr2-158130978-158133029	UPP2	29109	distal
2.03234e-307	0.385406	0.169	0.03	7.73072e-302	rods	chr19-17589768-17590767	GLT25D1	34175	distal
4.0052e-307	0.358138	0.301	0.1	1.52352e-301	rods	chr5-175841465-175845249	CPLX2	-26249	distal
4.90026e-307	0.412151	0.2	0.04	1.86399e-301	rods	chr6-65706943-65707914	EYS	0	promoter
2.36741e-306	0.398383	0.221	0.05	9.00529e-301	rods	chr14-60169286-60172017	DHRS7	0	promoter
3.39206e-306	0.365545	0.137	0.021	1.29029e-300	rods	chr17-57266668-57267915	MSI2	9656	distal
3.40524e-306	0.394757	0.168	0.03	1.2953e-300	rods	chr3-134430163-134433062	CEP63	-52681	distal
7.54565e-306	0.35954	0.306	0.104	2.87025e-300	rods	chr14-69710441-69714911	SRSF5	-11989	distal
9.61615e-306	0.379557	0.187	0.039	3.65784e-300	rods	chr10-127932404-127934009	PTPRE	25344	distal
1.34976e-304	0.398834	0.183	0.033	5.13428e-299	rods	chr20-35901157-35902717	SCAND1	51910	distal
1.48728e-304	0.408389	0.178	0.03	5.65739e-299	rods	chr3-53935901-53937106	RP11-884K10.5	-43913	distal
3.48224e-304	0.367398	0.29	0.092	1.32459e-298	rods	chr6-34474539-34477417	PACSIN1	8401	distal
1.37203e-303	0.402549	0.161	0.025	5.21901e-298	rods	chr10-126928074-126929669	DOCK1	22619	distal
1.82856e-303	0.394162	0.148	0.02	6.95558e-298	rods	chr1-24821472-24822597	CLIC4	76116	distal
2.19864e-303	0.390255	0.306	0.089	8.36331e-298	rods	chr15-69971084-69975578	TLE3	119208	distal
2.96205e-303	0.385263	0.143	0.021	1.12672e-297	rods	chr5-36817880-36818858	NIPBL	-57901	distal
3.38082e-303	0.400072	0.222	0.051	1.28601e-297	rods	chr2-219327023-219328504	RESP18	4126	distal
4.95513e-303	0.359258	0.319	0.111	1.88486e-297	rods	chr9-89745507-89749251	GADD45G	140470	distal
5.02422e-303	0.37201	0.229	0.058	1.91114e-297	rods	chr17-14340822-14342555	HS3ST3B1	39740	distal
7.46734e-303	0.380527	0.24	0.063	2.84046e-297	rods	chr22-33829208-33833027	LARGE	87388	distal
8.96048e-303	0.361741	0.309	0.102	3.40843e-297	rods	chr6-35533698-35535950	TULP1	-20760	distal
9.06335e-303	0.396465	0.24	0.06	3.44756e-297	rods	chr17-18376723-18379775	EVPLL	0	promoter
1.19771e-302	0.372462	0.199	0.046	4.5559e-297	rods	chr5-59002086-59004066	PDE4D	-2154	distal
1.31992e-302	0.375222	0.257	0.074	5.02077e-297	rods	chr20-48204199-48206840			intergenic
1.37599e-302	0.403727	0.177	0.032	5.23406e-297	rods	chr20-2813519-2815785	C20orf141;RP5-860F19.8	0	promoter
2.92112e-302	0.377046	0.204	0.048	1.11115e-296	rods	chr15-74426951-74429930	SEMA7A	3775	distal
6.75021e-302	0.377379	0.157	0.027	2.56768e-296	rods	chr15-62404222-62406720	TLN2	-154645	distal
7.95418e-302	0.387978	0.227	0.052	3.02565e-296	rods	chr6-7043996-7046430	RREB1	-61167	distal
8.43758e-302	0.422794	0.17	0.025	3.20953e-296	rods	chr3-41598755-41600898			intergenic
8.48452e-302	0.418827	0.191	0.036	3.22738e-296	rods	chr5-137479703-137481058	SPOCK1	18291	distal
4.61476e-301	0.371451	0.15	0.024	1.75538e-295	rods	chr9-74616413-74618602	RORB	814	distal
5.2676e-301	0.359895	0.259	0.074	2.00372e-295	rods	chr3-64129063-64135198	PRICKLE2	90284	distal
6.66233e-301	0.364851	0.197	0.046	2.53425e-295	rods	chr14-100361521-100363689	WARS	5497	distal
1.08099e-300	0.390223	0.182	0.035	4.11194e-295	rods	chr17-48868727-48870807	ATP5G1	-21958	distal
3.1074e-300	0.378517	0.168	0.031	1.18201e-294	rods	chr15-76327468-76329340	ISL2	-7384	distal
3.34796e-300	0.37483	0.27	0.076	1.27351e-294	rods	chr3-64461160-64464421	PRICKLE2	-15753	distal
9.20687e-300	0.377928	0.19	0.042	3.50215e-294	rods	chr9-2716836-2719330	KCNV2	0	promoter
7.92324e-299	0.374791	0.223	0.056	3.01388e-293	rods	chr5-38532008-38533182	LIFR	23465	distal
1.19994e-298	0.368574	0.232	0.061	4.56437e-293	rods	chr14-32224689-32225948	AKAP6	-103325	distal
1.39222e-298	0.38185	0.197	0.043	5.29579e-293	rods	chr13-109129916-109131032			intergenic
1.93511e-298	0.371873	0.188	0.04	7.36087e-293	rods	chr4-59699799-59701808			intergenic
3.36183e-298	0.348539	0.316	0.111	1.27879e-292	rods	chr6-106083726-106089266	PRDM1	0	promoter
4.48538e-298	0.357992	0.26	0.081	1.70617e-292	rods	chr17-6432818-6436641	AIPL1	0	promoter
5.81751e-298	0.365278	0.255	0.074	2.21289e-292	rods	chr6-42709477-42711643	PRPH2	10932	distal
9.30118e-298	0.307949	0.39	0.175	3.53803e-292	rods	chr11-119360880-119365953	USP2	0	promoter
1.04492e-297	0.343176	0.281	0.093	3.97471e-292	rods	chr8-133356028-133360468	NDRG1	-58442	distal
8.63701e-297	0.391486	0.132	0.016	3.28539e-291	rods	chr19-7290893-7291907	INSR	2025	distal
1.49742e-296	0.386596	0.189	0.041	5.69596e-291	rods	chr12-119333195-119335160	CCDC60	0	promoter
2.13309e-296	0.362122	0.208	0.05	8.11397e-291	rods	chr10-84223507-84228204	LRIT2	0	promoter
2.39551e-296	0.306555	0.479	0.233	9.11218e-291	rods	chr4-128226338-128231042	PGRMC2	42020	distal
5.0693e-296	0.387224	0.144	0.021	1.92829e-290	rods	chr10-98901259-98902420	HPSE2	-157188	distal
5.0917e-296	0.36294	0.099	0.007	1.9368e-290	rods	chr3-100482101-100482988	TMEM45A	-9631	distal
8.70345e-296	0.348857	0.098	0.009	3.31066e-290	rods	chr16-57978719-57979623	TEPP	2285	distal
1.15095e-295	0.36522	0.188	0.043	4.37804e-290	rods	chr3-133157429-133159149	TMEM108	32357	distal
2.18809e-295	0.368442	0.293	0.092	8.32318e-290	rods	chr18-59376000-59378100	LMAN1	-16038	distal
9.81898e-295	0.358185	0.382	0.148	3.73499e-289	rods	chr20-63415358-63419772	KCNQ2	44091	distal
9.95533e-295	0.347207	0.217	0.06	3.78686e-289	rods	chr15-70492195-70496101			intergenic
3.52138e-294	0.372697	0.241	0.067	1.33948e-288	rods	chr19-2549604-2552292	GADD45B	73457	distal
3.87461e-294	0.336395	0.384	0.156	1.47385e-288	rods	chr7-1584339-1589472	PSMG3	-13334	distal
4.53516e-294	0.373435	0.126	0.016	1.72511e-288	rods	chr5-172754394-172755601	DUSP1	15595	distal
5.0666e-294	0.281094	0.42	0.202	1.92726e-288	rods	chr8-133264217-133276918	NDRG1	20320	distal
7.52789e-294	0.367045	0.161	0.03	2.8635e-288	rods	chr14-99424431-99426758	SETD3	54031	distal
8.09769e-294	0.370068	0.185	0.038	3.08024e-288	rods	chr11-117044917-117046786	SIK3	51636	distal
1.02107e-293	0.370064	0.153	0.027	3.88401e-288	rods	chr14-99723806-99725394	CYP46A1	39103	distal
1.27463e-293	0.285546	0.44	0.224	4.84851e-288	rods	chr17-78779094-78785358	CYTH1	0	promoter
3.06085e-293	0.371188	0.209	0.053	1.1643e-287	rods	chr22-24525201-24526785	GUCD1	28305	distal
4.36854e-293	0.317914	0.441	0.209	1.66173e-287	rods	chr9-120868025-120870627	PHF19	0	promoter
4.91338e-293	0.36912	0.337	0.121	1.86898e-287	rods	chr22-43991940-43997780	PARVB	-1431	distal
7.07352e-293	0.387158	0.206	0.047	2.69066e-287	rods	chr13-94414562-94417183	DCT	62487	distal
8.49928e-293	0.383743	0.171	0.033	3.233e-287	rods	chr11-106462980-106464231			intergenic
1.35356e-292	0.297751	0.494	0.258	5.14874e-287	rods	chr15-65420144-65423739	IGDCC4	0	promoter
1.734e-292	0.379086	0.21	0.051	6.59589e-287	rods	chr1-154447927-154449066	IL6R	42705	distal
3.62223e-292	0.316016	0.328	0.135	1.37784e-286	rods	chr13-112065596-112069406	SOX1	0	promoter
1.54666e-291	0.337577	0.339	0.128	5.88327e-286	rods	chr4-81721923-81725649			intergenic
1.3668e-290	0.322748	0.311	0.121	5.19909e-285	rods	chr2-241769855-241776016	GAL3ST2	-809	promoter
1.74156e-290	0.379298	0.128	0.016	6.62463e-285	rods	chr5-37008767-37009659	NIPBL	131978	distal
4.62037e-290	0.360931	0.161	0.032	1.75752e-284	rods	chr22-27752398-27753538	MN1	47961	distal
1.78833e-289	0.332783	0.305	0.111	6.80254e-284	rods	chr2-219524263-219527662	ASIC4	9934	distal
5.34114e-289	0.340488	0.393	0.158	2.03169e-283	rods	chr17-80022839-80027246	TBC1D16	8603	distal
7.47389e-289	0.363851	0.143	0.023	2.84296e-283	rods	chr10-95327046-95328275	PDLIM1	-36022	distal
2.04836e-288	0.399697	0.147	0.019	7.79166e-283	rods	chr9-35424141-35425197	UNC13B	82312	distal
2.14315e-288	0.380539	0.224	0.057	8.15224e-283	rods	chr1-112040798-112043013	KCND3	-51643	distal
3.70606e-288	0.3791	0.198	0.045	1.40973e-282	rods	chr3-52665031-52666696	PBRM1	13018	distal
3.8251e-288	0.362188	0.171	0.037	1.45501e-282	rods	chr22-23088130-23091228	GNAZ	17770	distal
4.36945e-288	0.359888	0.224	0.06	1.66207e-282	rods	chr7-26489910-26493668	SNX10	125586	distal
4.91217e-288	0.377574	0.186	0.039	1.86852e-282	rods	chr10-6184768-6185811	PFKFB3	-17055	distal
1.39444e-287	0.377104	0.108	0.009	5.30425e-282	rods	chr1-112857096-112857859	SLC16A1	98205	distal
1.57285e-287	0.352638	0.122	0.017	5.98287e-282	rods	chr11-119299680-119301490	MCAM	15627	distal
1.91518e-286	0.347985	0.293	0.098	7.28508e-281	rods	chr20-57223521-57225575	BMP7	40768	distal
8.5855e-286	0.368918	0.124	0.015	3.2658e-280	rods	chr16-87237612-87238976	C16orf95	78405	distal
2.32388e-285	0.360124	0.194	0.048	8.8397e-280	rods	chr11-108966913-108968593			intergenic
2.83447e-285	0.349537	0.142	0.025	1.07819e-279	rods	chr19-5807775-5808882	NRTN	-14920	distal
7.1238e-285	0.369769	0.15	0.026	2.70979e-279	rods	chr6-5179524-5180827	LYRM4	79907	distal
1.11341e-284	0.382169	0.154	0.026	4.23523e-279	rods	chr16-29028584-29030751	LAT	43167	distal
1.29884e-284	0.365381	0.276	0.087	4.94059e-279	rods	chr1-30891922-30896502	SDC3	12260	distal
1.52512e-284	0.37316	0.145	0.024	5.80134e-279	rods	chr11-57601088-57602013	SERPING1	2818	distal
1.52725e-284	0.378908	0.141	0.022	5.80944e-279	rods	chr11-35610464-35611662	FJX1	-6757	distal
2.17756e-284	0.356183	0.129	0.02	8.2831e-279	rods	chr6-14797606-14799046			intergenic
2.27775e-284	0.388284	0.19	0.04	8.66422e-279	rods	chr1-165941185-165942740	UCK2	45601	distal
7.65179e-284	0.251193	0.621	0.393	2.91063e-278	rods	chr17-3885310-3894095	CAMKK1	0	promoter
1.58809e-283	0.356426	0.289	0.093	6.04085e-278	rods	chr19-47862895-47864911	SULT2A1	21487	distal
3.22721e-283	0.387997	0.164	0.027	1.22758e-277	rods	chr17-75018763-75021431	ICT1	6090	distal
1.94652e-282	0.379536	0.245	0.065	7.40427e-277	rods	chr16-31064716-31066184	ZNF668	0	promoter
2.76047e-282	0.364905	0.156	0.028	1.05004e-276	rods	chr8-31950290-31951691			intergenic
5.88844e-282	0.33656	0.31	0.114	2.23988e-276	rods	chr22-42398916-42401232	NFAM1	31164	distal
1.40866e-281	0.379832	0.136	0.019	5.35834e-276	rods	chr8-6675603-6676539	AGPAT5	-31818	distal
2.01875e-281	0.277038	0.532	0.293	7.67903e-276	rods	chr22-43920958-43926945	PNPLA3	0	promoter
4.51963e-281	0.359409	0.206	0.052	1.7192e-275	rods	chr10-78059570-78060863	RPS24	25708	distal
5.25737e-281	0.342856	0.278	0.09	1.99983e-275	rods	chr13-112902668-112906962	MCF2L	474	distal
7.14552e-281	0.399938	0.263	0.072	2.71805e-275	rods	chr15-88493455-88494884	MRPS11	25738	distal
8.96081e-281	0.329894	0.267	0.089	3.40856e-275	rods	chr16-84306480-84309294	WFDC1	11537	distal
1.17229e-280	0.360469	0.175	0.038	4.45923e-275	rods	chr17-6172081-6173482	WSCD1	100974	distal
1.70269e-280	0.333305	0.353	0.139	6.47677e-275	rods	chr3-32839897-32845832	TRIM71	21880	distal
1.83863e-280	0.356546	0.163	0.034	6.99386e-275	rods	chr1-234587748-234590105	IRF2BP2	19421	distal
2.21207e-280	0.383832	0.244	0.066	8.41436e-275	rods	chr11-34279260-34281722	ABTB2	76287	distal
4.68953e-280	0.357985	0.233	0.065	1.78383e-274	rods	chr22-24449314-24451300	ADORA2A	17196	distal
7.99931e-280	0.351085	0.293	0.098	3.04282e-274	rods	chr19-47093795-47099259	ZC3H4	14494	distal
1.16511e-279	0.288618	0.483	0.252	4.43191e-274	rods	chr1-44028959-44032832	SLC6A9	0	promoter
1.58035e-279	0.366647	0.119	0.015	6.01143e-274	rods	chr8-38240131-38241099	DDHD2	-5705	distal
1.8284e-279	0.396869	0.209	0.047	6.95497e-274	rods	chr2-235017165-235018423	SH3BP4	38463	distal
6.39537e-279	0.355524	0.202	0.052	2.4327e-273	rods	chr1-36770032-36774619			intergenic
2.48286e-278	0.367975	0.174	0.034	9.44441e-273	rods	chr3-47294141-47296051	KIF9	-10690	distal
1.10484e-277	0.356392	0.161	0.032	4.20266e-272	rods	chr9-27835100-27837703			intergenic
1.61322e-277	0.347412	0.108	0.012	6.13646e-272	rods	chr3-87964508-87966326	HTR1F	-24370	distal
3.20878e-277	0.358133	0.142	0.024	1.22057e-271	rods	chr15-47601975-47603164	SEMA6D	-114199	distal
4.47765e-277	0.372223	0.169	0.032	1.70323e-271	rods	chr4-175648250-175650193	GPM6A	137484	distal
6.08715e-277	0.351454	0.131	0.022	2.31546e-271	rods	chr17-48246266-48247259	SNX11	138479	distal
6.79913e-277	0.368228	0.149	0.026	2.58629e-271	rods	chr11-66610134-66611202	RBM14	-5380	distal
8.46001e-277	0.359506	0.135	0.022	3.21806e-271	rods	chr1-110049524-110051088	STRIP1	14909	distal
1.21845e-276	0.353579	0.284	0.095	4.63479e-271	rods	chr14-72642772-72644511	RGS6	183104	distal
3.19511e-276	0.355834	0.134	0.022	1.21537e-270	rods	chr2-64348570-64349730	LGALSL	-104362	distal
5.55243e-276	0.368469	0.149	0.025	2.11206e-270	rods	chr18-36314080-36316550	FHOD3	16245	distal
6.65067e-276	0.369074	0.29	0.092	2.52981e-270	rods	chr1-41313529-41316807	FOXO6	-45124	distal
2.12875e-275	0.354397	0.225	0.064	8.09745e-270	rods	chr11-131392249-131394383	NTM	21772	distal
2.7163e-275	0.354595	0.153	0.029	1.03324e-269	rods	chr5-133059280-133060868	HSPA4	7040	distal
5.8121e-275	0.361762	0.248	0.071	2.21084e-269	rods	chr4-84166896-84168173			intergenic
7.0265e-275	0.356755	0.219	0.061	2.67277e-269	rods	chr2-120593458-120598212	GLI2	-194197	distal
7.56105e-275	0.37629	0.175	0.036	2.87611e-269	rods	chr19-4629285-4630456	TNFAIP8L1	-9062	distal
8.56369e-275	0.37931	0.21	0.05	3.2575e-269	rods	chr20-13839144-13840622	NDUFAF5	54095	distal
1.35905e-274	0.357063	0.095	0.007	5.16962e-269	rods	chr15-71818596-71820899	NR2E3	8005	distal
2.07502e-274	0.357159	0.156	0.03	7.89307e-269	rods	chr7-33831935-33833002	BMPER	-71909	distal
3.22143e-274	0.358728	0.133	0.022	1.22538e-268	rods	chr5-78697902-78698927	LHFPL2	-49077	distal
4.84063e-274	0.359939	0.119	0.016	1.8413e-268	rods	chr8-144160824-144161761	MROH1	0	promoter
4.98511e-274	0.381289	0.198	0.044	1.89626e-268	rods	chr22-21707164-21708566	YPEL1	27190	distal
7.20701e-274	0.378399	0.173	0.032	2.74144e-268	rods	chr16-76433699-76435957	RP11-58C22.1	-117460	distal
1.08493e-273	0.356087	0.119	0.016	4.12692e-268	rods	chr1-28321866-28322785	MED18	-6253	distal
1.79108e-273	0.286306	0.405	0.198	6.81299e-268	rods	chr1-2042980-2054449	PRKCZ	-19013	distal
6.0374e-273	0.33683	0.217	0.065	2.29654e-267	rods	chr20-17645746-17649770	RRBP1	10204	distal
7.11375e-273	0.348482	0.238	0.069	2.70596e-267	rods	chr11-131814569-131816492	NTM	-94511	distal
9.66686e-273	0.376255	0.169	0.033	3.67713e-267	rods	chr11-118975941-118977055	FOXR1	4235	distal
1.02755e-272	0.366252	0.153	0.028	3.90866e-267	rods	chr22-17238663-17240230	CECR1	-16674	distal
1.73724e-272	0.353218	0.257	0.079	6.60818e-267	rods	chr12-119412206-119414008	CCDC60	77278	distal
1.95093e-272	0.365418	0.225	0.06	7.42105e-267	rods	chr19-2789997-2792716	THOP1	-3291	distal
3.34715e-272	0.352211	0.145	0.026	1.27321e-266	rods	chr8-54615014-54617400	RP1	0	promoter
4.43513e-272	0.351643	0.158	0.032	1.68706e-266	rods	chr15-75151137-75152403	C15orf39	-46489	distal
4.72343e-272	0.350607	0.169	0.035	1.79672e-266	rods	chr10-101989386-101991636	C10orf76	64558	distal
1.29637e-271	0.35516	0.308	0.103	4.93121e-266	rods	chr16-17353137-17355206	XYLT1	115676	distal
2.74472e-271	0.372002	0.24	0.062	1.04405e-265	rods	chr2-42195387-42197471	EML4	25927	distal
2.96548e-271	0.337362	0.108	0.014	1.12802e-265	rods	chr6-35544630-35545589	TULP1	-31692	distal
3.19113e-271	0.357402	0.142	0.024	1.21386e-265	rods	chr9-116774013-116775200	TRIM32	86684	distal
3.57094e-270	0.353159	0.119	0.016	1.35833e-264	rods	chr1-186478555-186479692	PDC	-17433	distal
4.88106e-270	0.348847	0.124	0.019	1.85668e-264	rods	chr3-50100248-50101443	RBM5	11330	distal
5.27612e-270	0.342458	0.126	0.019	2.00696e-264	rods	chr9-125358525-125359900	GAPVD1	56417	distal
5.79099e-270	0.361042	0.216	0.057	2.2028e-264	rods	chr14-98404420-98405898			intergenic
6.84214e-270	0.366385	0.146	0.025	2.60265e-264	rods	chr1-5517732-5518687			intergenic
9.81925e-270	0.327753	0.252	0.084	3.7351e-264	rods	chr3-45938550-45940430	CXCR6	-503	promoter
1.23539e-269	0.311143	0.385	0.164	4.69925e-264	rods	chr6-106079546-106081525	PRDM1	-4795	distal
2.64817e-269	0.370881	0.313	0.109	1.00733e-263	rods	chr19-4922526-4924146	UHRF1	12152	distal
3.03216e-269	0.342648	0.205	0.055	1.15339e-263	rods	chr1-211483360-211486079	RD3	6839	distal
4.27847e-269	0.356521	0.156	0.031	1.62747e-263	rods	chr11-75503362-75504595	GDPD5	-12611	distal
8.86889e-269	0.362474	0.177	0.039	3.37359e-263	rods	chr4-184769067-184770745	CENPU	-34934	distal
2.59572e-268	0.355866	0.173	0.038	9.87372e-263	rods	chr17-39071274-39072809	PLXDC1	78841	distal
2.94712e-268	0.315951	0.28	0.097	1.12104e-262	rods	chr20-60728855-60730244			intergenic
3.11994e-268	0.362659	0.152	0.027	1.18678e-262	rods	chr17-76577494-76578676	RP11-666A8.13	-6950	distal
8.69562e-268	0.268408	0.517	0.284	3.30768e-262	rods	chr15-76333304-76343947	ISL2	0	promoter
9.07206e-268	0.360177	0.173	0.036	3.45087e-262	rods	chr1-29209156-29212081	MECR	18844	distal
1.57847e-267	0.3553	0.152	0.029	6.00427e-262	rods	chr17-80518665-80519961	RPTOR	-24916	distal
2.15546e-267	0.345693	0.208	0.055	8.19903e-262	rods	chr12-51183359-51185145	TFCP2	-10225	distal
2.67907e-267	0.333072	0.277	0.096	1.01908e-261	rods	chr11-77170098-77176559	MYO7A	41797	distal
3.97413e-267	0.378304	0.211	0.053	1.5117e-261	rods	chr8-53732443-53735152	ATP6V1H	104810	distal
4.03708e-267	0.32233	0.39	0.164	1.53564e-261	rods	chr1-53080876-53102055	PODN	18664	distal
4.46869e-267	0.362298	0.13	0.02	1.69982e-261	rods	chr14-68413597-68414383			intergenic
5.19023e-267	0.331494	0.337	0.129	1.97428e-261	rods	chr7-1609990-1612927	PSMG3	-38985	distal
5.54684e-267	0.331216	0.313	0.121	2.10993e-261	rods	chr17-77279491-77283539	2009-09-01	0	promoter
6.51587e-267	0.329093	0.361	0.145	2.47854e-261	rods	chr16-1075526-1084041	SSTR5	0	promoter
9.31355e-267	0.360469	0.172	0.039	3.54274e-261	rods	chr17-16414885-16416850	TRPV2	0	promoter
1.90717e-266	0.344801	0.123	0.018	7.2546e-261	rods	chr15-62635391-62636295	TLN2	45712	distal
2.23237e-266	0.359839	0.159	0.031	8.49161e-261	rods	chr11-117333694-117335595	CEP164	5840	distal
2.46129e-266	0.35793	0.173	0.038	9.36239e-261	rods	chr7-71388879-71390829	WBSCR17	53331	distal
3.95638e-266	0.373977	0.11	0.01	1.50495e-260	rods	chr14-59798332-59799634	RTN1	71119	distal
4.32333e-266	0.351031	0.144	0.025	1.64453e-260	rods	chr2-134663705-134664981	TMEM163	54020	distal
6.98152e-266	0.358464	0.199	0.048	2.65567e-260	rods	chr14-51056376-51059443	TRIM9	35634	distal
1.16368e-265	0.343233	0.117	0.017	4.42646e-260	rods	chr11-35631735-35632841	FJX1	13317	distal
1.69376e-265	0.37099	0.19	0.045	6.44282e-260	rods	chr20-63629260-63630267	GMEB2	-2219	distal
2.76548e-265	0.355222	0.267	0.084	1.05195e-259	rods	chr19-10755181-10757781	DNM2	36974	distal
2.85112e-265	0.355275	0.17	0.036	1.08452e-259	rods	chr12-90090518-90092238			intergenic
4.54873e-265	0.326681	0.428	0.184	1.73027e-259	rods	chr1-112721544-112724191	FAM19A3	968	distal
4.63646e-265	0.362797	0.14	0.023	1.76364e-259	rods	chr17-42453600-42454865	ATP6V0A1	-3979	distal
4.70641e-265	0.352213	0.129	0.02	1.79025e-259	rods	chr1-86417029-86418236	CLCA2	-5850	distal
5.3709e-265	0.386859	0.273	0.077	2.04301e-259	rods	chr12-55016479-55018505	NEUROD4	-1440	distal
1.16426e-264	0.313119	0.354	0.153	4.42867e-259	rods	chr2-119677616-119681476	TMEM177	0	promoter
1.24389e-264	0.310245	0.411	0.186	4.73156e-259	rods	chr1-18106064-18113061	IGSF21	0	promoter
1.27003e-264	0.373221	0.139	0.022	4.83099e-259	rods	chr3-184437073-184438138	THPO	-55105	distal
2.14784e-264	0.34223	0.148	0.028	8.17005e-259	rods	chr1-94142389-94147266	ABCA4	-21257	distal
2.16867e-264	0.350289	0.125	0.019	8.2493e-259	rods	chr20-49397380-49398218	KCNB1	84459	distal
3.02863e-264	0.293253	0.367	0.167	1.15204e-258	rods	chr8-37897436-37901171	RAB11FIP1	0	promoter
4.29081e-264	0.358717	0.198	0.049	1.63216e-258	rods	chr11-131365093-131366856	NTM	-3622	distal
4.41648e-264	0.286315	0.464	0.229	1.67996e-258	rods	chr10-125020335-125029853	CTBP2	0	promoter
9.81104e-264	0.368262	0.18	0.04	3.73197e-258	rods	chr3-184254960-184256037	EEF1AKMT4-ECE2	5266	distal
1.0516e-263	0.355344	0.158	0.03	4.00012e-258	rods	chr17-74134609-74136165	RPL38	-67417	distal
1.52008e-263	0.383705	0.148	0.025	5.78214e-258	rods	chr20-31748947-31749857	TPX2	9677	distal
2.45313e-263	0.340655	0.127	0.02	9.33133e-258	rods	chr2-153875606-153877576	GALNT13	3694	distal
2.52692e-263	0.329509	0.332	0.124	9.61203e-258	rods	chr11-123350711-123352075	GRAMD1B	-6353	distal
3.00068e-263	0.352806	0.12	0.016	1.14142e-257	rods	chr7-151566855-151568052	RHEB	-46735	distal
3.60598e-263	0.336171	0.148	0.031	1.37166e-257	rods	chr10-22589527-22590650	PIP4K2A	1064	distal
3.91393e-263	0.358466	0.158	0.032	1.4888e-257	rods	chr4-139566818-139568965	SETD7	-10044	distal
7.38027e-263	0.355832	0.22	0.061	2.80734e-257	rods	chr19-555693-557354	GZMM	11659	distal
9.11861e-263	0.35852	0.115	0.015	3.46858e-257	rods	chr2-201630855-201631597	TMEM237	11096	distal
9.41387e-263	0.37342	0.173	0.035	3.58089e-257	rods	chr5-126757222-126759265	LMNB1	-17883	distal
1.86923e-262	0.358516	0.186	0.042	7.11027e-257	rods	chr1-2156465-2158326	FAAP20	36449	distal
3.60506e-262	0.363675	0.279	0.088	1.37131e-256	rods	chr19-41373020-41375354	TMEM91	-870	promoter
3.96372e-262	0.337024	0.199	0.055	1.50774e-256	rods	chr7-150937715-150939838	KCNH2	16069	distal
5.46809e-262	0.346845	0.251	0.079	2.07998e-256	rods	chr20-25352718-25357423	ABHD12	33554	distal
6.03421e-262	0.337531	0.192	0.05	2.29532e-256	rods	chr15-62622591-62623495	TLN2	32912	distal
1.0663e-261	0.324857	0.295	0.112	4.05604e-256	rods	chr20-31707951-31713682	BCL2L1	8916	distal
1.47694e-261	0.349683	0.155	0.031	5.61807e-256	rods	chr18-46088213-46089368	ATP5A1	8929	distal
3.09328e-261	0.361363	0.16	0.032	1.17664e-255	rods	chr17-80608087-80609983	RPTOR	62620	distal
9.4761e-261	0.365417	0.143	0.025	3.60457e-255	rods	chr4-86630412-86631353	PTPN13	-3899	distal
1.724e-260	0.33163	0.271	0.093	6.55785e-255	rods	chr11-116172885-116178000			intergenic
2.38935e-260	0.31137	0.326	0.131	9.08872e-255	rods	chr22-24443621-24446617	ADORA2A	11503	distal
8.48058e-260	0.363	0.157	0.03	3.22589e-254	rods	chr11-95307405-95308624	SESN3	-74864	distal
1.43017e-259	0.313736	0.247	0.086	5.44015e-254	rods	chr16-57975546-57976958	TEPP	0	promoter
2.16333e-259	0.333528	0.166	0.039	8.22899e-254	rods	chr16-4205822-4209209	SRL	30535	distal
2.44468e-259	0.364425	0.239	0.068	9.29918e-254	rods	chrX-153556220-153558113	ATP2B3	20099	distal
2.59084e-259	0.391642	0.232	0.056	9.85517e-254	rods	chr17-27977335-27978819	NLK	-63337	distal
4.05929e-259	0.359236	0.135	0.021	1.54409e-253	rods	chr4-15472558-15473511	CC2D2A	2546	distal
6.81198e-259	0.340093	0.122	0.019	2.59118e-253	rods	chr6-11082477-11084352	SMIM13	-9681	distal
6.88909e-259	0.347456	0.119	0.017	2.62051e-253	rods	chr4-18192773-18194993	LCORL	-170897	distal
1.65862e-258	0.368647	0.123	0.016	6.30914e-253	rods	chr11-46606741-46608509	HARBI1	8719	distal
2.76084e-258	0.349451	0.296	0.103	1.05018e-252	rods	chr3-194869435-194873145	FAM43A	182892	distal
3.84305e-258	0.371666	0.172	0.035	1.46184e-252	rods	chr10-119736902-119738231	INPP5F	10741	distal
4.25551e-258	0.348627	0.16	0.034	1.61873e-252	rods	chr1-176363753-176365662	PAPPA2	-97509	distal
7.30047e-258	0.354045	0.171	0.036	2.77699e-252	rods	chr20-45327893-45329376	SDC4	19049	distal
1.47179e-257	0.325503	0.316	0.117	5.59848e-252	rods	chr7-75790712-75792621	CCL26	-816	promoter
1.75989e-257	0.260744	0.417	0.215	6.69435e-252	rods	chr1-160191791-160199170	CASQ1	0	promoter
4.72861e-257	0.360048	0.155	0.031	1.79869e-251	rods	chr1-112410455-112412291	CTTNBP2NL	14275	distal
1.57048e-256	0.367853	0.163	0.032	5.97387e-251	rods	chr17-43913184-43914954	MPP2	-3473	distal
1.86081e-256	0.355848	0.203	0.052	7.07823e-251	rods	chr2-181614815-181616007	CERKL	41000	distal
2.3315e-256	0.336053	0.134	0.024	8.86868e-251	rods	chr2-9380662-9381991	ITGB1BP1	41239	distal
3.98428e-256	0.31706	0.081	0.006	1.51556e-250	rods	chr11-40196989-40197853	LRRC4C	95278	distal
4.13318e-256	0.359699	0.153	0.029	1.5722e-250	rods	chr16-87988215-87989159	BANP	18198	distal
5.07051e-256	0.346597	0.149	0.029	1.92875e-250	rods	chr6-46058513-46059954	CLIC5	20395	distal
1.58558e-255	0.333752	0.186	0.05	6.03132e-250	rods	chr16-66918650-66922460	CDH16	0	promoter
1.73042e-255	0.345043	0.131	0.021	6.58227e-250	rods	chr22-33841177-33842056	LARGE	78359	distal
2.44659e-255	0.34541	0.157	0.034	9.30647e-250	rods	chr6-122726537-122727887	PKIB	8976	distal
3.00593e-255	0.352137	0.177	0.04	1.14341e-249	rods	chr20-36733465-36735072	NDRG3	10982	distal
3.07248e-255	0.273781	0.433	0.218	1.16873e-249	rods	chr2-133263868-133267746			intergenic
6.67985e-255	0.331577	0.106	0.014	2.54092e-249	rods	chr1-160177127-160178116	ATP1A4	0	promoter
9.11394e-255	0.272273	0.436	0.229	3.46681e-249	rods	chr13-23374781-23377229	SACS	0	promoter
1.98317e-254	0.366087	0.205	0.051	7.54368e-249	rods	chr2-5019422-5022456			intergenic
3.93917e-254	0.340687	0.147	0.029	1.4984e-248	rods	chr10-87067861-87069038	GLUD1	25829	distal
7.69407e-254	0.339453	0.14	0.028	2.92671e-248	rods	chr2-180448633-180449959			intergenic
9.61713e-254	0.368241	0.146	0.025	3.65821e-248	rods	chr15-88571107-88572484	DET1	-24432	distal
1.49619e-253	0.355615	0.186	0.043	5.6913e-248	rods	chr4-81411217-81413612	RASGEF1B	57625	distal
2.57714e-253	0.325299	0.277	0.1	9.80305e-248	rods	chr17-8001907-8004451	GUCY2D	0	promoter
4.30814e-253	0.335651	0.22	0.065	1.63875e-247	rods	chr10-24415348-24417652	KIAA1217	-31781	distal
5.36641e-253	0.354928	0.211	0.056	2.0413e-247	rods	chr12-5687555-5690199	ANO2	-122917	distal
7.84019e-253	0.353693	0.138	0.025	2.98229e-247	rods	chr5-115150501-115151933	TRIM36	18029	distal
8.35111e-253	0.357679	0.179	0.04	3.17664e-247	rods	chr1-54770813-54772529	PARS2	-6299	distal
8.51115e-253	0.366152	0.196	0.047	3.23751e-247	rods	chr2-179824617-179825951	ZNF385B	35555	distal
1.44088e-252	0.315632	0.324	0.131	5.4809e-247	rods	chr17-79933364-79941418	TBC1D16	9411	distal
1.49256e-252	0.367741	0.162	0.032	5.67748e-247	rods	chr19-37345400-37347318	HKR1	0	promoter
1.89975e-252	0.359975	0.127	0.019	7.22636e-247	rods	chr16-29120300-29121179	LAT	134883	distal
1.96288e-252	0.340339	0.139	0.027	7.4665e-247	rods	chr11-102225687-102227932	BIRC3	-89518	distal
3.38871e-252	0.333554	0.107	0.015	1.28901e-246	rods	chr19-54451058-54452994	LENG8	0	promoter
4.26131e-252	0.345221	0.218	0.062	1.62094e-246	rods	chr5-107482055-107484726	EFNA5	-54541	distal
5.34214e-252	0.337481	0.117	0.017	2.03207e-246	rods	chr7-104299166-104300072	LHFPL3	-28584	distal
5.69641e-252	0.301234	0.455	0.215	2.16683e-246	rods	chr3-45993462-45996347	FYCO1	0	promoter
1.67916e-251	0.314071	0.071	0.004	6.38726e-246	rods	chr19-20724847-20725560	ZNF66	-50744	distal
1.72789e-251	0.355971	0.221	0.061	6.57265e-246	rods	chr1-19239737-19241828	EMC1	9682	distal
1.81955e-251	0.352373	0.164	0.034	6.92129e-246	rods	chr8-140972567-140974581	PTK2	-17732	distal
2.04068e-251	0.354787	0.289	0.09	7.76243e-246	rods	chr17-27995752-27998339	NLK	-43817	distal
2.67542e-251	0.360878	0.155	0.03	1.01769e-245	rods	chr12-129254094-129255279	TMEM132D	-168094	distal
3.16783e-251	0.357553	0.163	0.033	1.20499e-245	rods	chr2-22995079-22996458			intergenic
4.13012e-251	0.309129	0.331	0.133	1.57103e-245	rods	chr12-124548535-124552193	NCOR2	-12932	distal
4.94356e-251	0.353446	0.114	0.014	1.88046e-245	rods	chr19-40454684-40455659	SERTAD3	-9979	distal
6.67826e-251	0.279915	0.482	0.258	2.54031e-245	rods	chr16-85549569-85560133	GSE1	-51276	distal
7.1667e-251	0.363676	0.157	0.03	2.7261e-245	rods	chr9-105140782-105142647	SLC44A1	-101975	distal
7.94924e-251	0.356267	0.211	0.055	3.02377e-245	rods	chr4-77167200-77171958	CCNG2	8775	distal
1.57085e-250	0.316697	0.351	0.143	5.97526e-245	rods	chr7-44220797-44226989	YKT6	19749	distal
2.11195e-250	0.341129	0.132	0.023	8.03354e-245	rods	chr3-145648244-145649086			intergenic
2.99598e-250	0.350347	0.134	0.022	1.13963e-244	rods	chr1-169740473-169742918	SELE	-6411	distal
3.65372e-250	0.341553	0.114	0.016	1.38982e-244	rods	chrX-10146249-10146983	CLCN4	-9962	distal
3.72995e-250	0.276695	0.438	0.223	1.41882e-244	rods	chr22-46146742-46152387	PPARA	0	promoter
4.37171e-250	0.335797	0.236	0.072	1.66293e-244	rods	chr14-94047534-94052272	DDX24	9982	distal
6.6771e-250	0.346702	0.203	0.054	2.53987e-244	rods	chr3-134422591-134424489	AMOTL2	-47112	distal
1.52018e-249	0.337657	0.226	0.066	5.78254e-244	rods	chr1-29513219-29516468			intergenic
2.45488e-249	0.335055	0.268	0.091	9.33798e-244	rods	chr15-74227039-74231639	CCDC33	-4650	distal
3.48056e-249	0.353152	0.175	0.04	1.32395e-243	rods	chr4-3853139-3855112	ADRA2C	86742	distal
7.25144e-249	0.366066	0.225	0.061	2.75834e-243	rods	chr16-76440942-76442917	RP11-58C22.1	-110500	distal
8.38184e-249	0.357341	0.123	0.018	3.18833e-243	rods	chr7-67635982-67637356			intergenic
1.49752e-248	0.333501	0.233	0.069	5.69636e-243	rods	chr7-129737919-129744423	NRF1	107842	distal
2.02976e-248	0.290643	0.382	0.179	7.7209e-243	rods	chr3-13273260-13284037	NUP210	136273	distal
3.66036e-248	0.351575	0.146	0.027	1.39235e-242	rods	chr14-94880498-94882989	GSC	-110268	distal
3.85158e-248	0.342608	0.147	0.031	1.46508e-242	rods	chr3-14376364-14377685	SLC6A6	-24891	distal
4.10227e-248	0.253018	0.573	0.353	1.56044e-242	rods	chr2-219385904-219389786	DNPEP	0	promoter
4.66061e-248	0.351291	0.167	0.036	1.77283e-242	rods	chr19-30552197-30553733	ZNF536	179786	distal
5.73058e-248	0.319905	0.281	0.105	2.17983e-242	rods	chr7-98399548-98401873	BAIAP2L1	0	promoter
6.14762e-248	0.343881	0.229	0.066	2.33846e-242	rods	chr11-117051614-117054444	SIK3	43978	distal
7.42487e-248	0.339329	0.184	0.046	2.82431e-242	rods	chr1-107793164-107796435	VAV3	-104660	distal
1.35179e-247	0.29293	0.41	0.187	5.14202e-242	rods	chr1-205348045-205353214	KLHDC8A	3365	distal
1.4322e-247	0.381855	0.251	0.071	5.44786e-242	rods	chr19-12747714-12750860	BEST2	-842	promoter
2.34733e-247	0.37012	0.132	0.019	8.92889e-242	rods	chr15-57435990-57436701	CGNL1	59486	distal
5.90161e-247	0.344406	0.147	0.03	2.24489e-241	rods	chr11-70771198-70773409	SHANK2	-109001	distal
7.38303e-247	0.317303	0.287	0.106	2.8084e-241	rods	chr1-36708454-36712286			intergenic
7.87631e-247	0.348197	0.121	0.018	2.99603e-241	rods	chr11-107730425-107732743	SLN	-10732	distal
8.85528e-247	0.324596	0.147	0.033	3.36841e-241	rods	chr22-19114445-19117713	DGCR2	4742	distal
4.17827e-246	0.337798	0.119	0.018	1.58935e-240	rods	chr9-132372083-132373154	SETX	-17098	distal
4.24028e-246	0.271556	0.448	0.233	1.61294e-240	rods	chr1-1917252-1927738	TMEM52	0	promoter
7.2055e-246	0.349606	0.159	0.034	2.74086e-240	rods	chr19-1346116-1347499	MUM1	-8815	distal
8.38851e-246	0.32062	0.375	0.158	3.19087e-240	rods	chr22-27437650-27439422			intergenic
1.65142e-245	0.323294	0.318	0.12	6.28175e-240	rods	chr2-30251885-30257867	LBH	19706	distal
3.52545e-245	0.362024	0.139	0.024	1.34103e-239	rods	chr8-125170964-125172591	NSMCE2	46821	distal
4.28049e-245	0.352557	0.147	0.027	1.62823e-239	rods	chr15-65632281-65633396	SLC24A1	8201	distal
7.6748e-245	0.325425	0.08	0.005	2.91938e-239	rods	chr2-214966336-214967124	ABCA12	64963	distal
9.34753e-245	0.340487	0.188	0.049	3.55566e-239	rods	chr15-61364457-61365623	RORA	-135138	distal
1.46767e-244	0.348161	0.133	0.023	5.58281e-239	rods	chr15-85946723-85948582	AGBL1	-131391	distal
1.51647e-244	0.356594	0.171	0.038	5.76841e-239	rods	chr21-15221699-15223166	NRIP1	-156699	distal
1.73683e-244	0.352561	0.201	0.053	6.60664e-239	rods	chr3-13087543-13088835	IQSEC1	-14426	distal
2.47593e-244	0.339559	0.164	0.037	9.41808e-239	rods	chr10-102312583-102314236	GBF1	67052	distal
3.32467e-244	0.332236	0.209	0.059	1.26466e-238	rods	chr14-92190006-92191731	CPSF2	68070	distal
7.87696e-244	0.30013	0.444	0.223	2.99628e-238	rods	chr2-218995633-219004442	CRYBA2	-2212	distal
1.72352e-243	0.338801	0.187	0.047	6.55602e-238	rods	chr6-170251761-170253096	DLL1	37378	distal
3.62421e-243	0.334005	0.164	0.038	1.3786e-237	rods	chr6-161747307-161749940	PARK2	-177887	distal
5.11288e-243	0.352249	0.269	0.084	1.94486e-237	rods	chr1-22970763-22973618	LACTBL1	-5425	distal
6.16171e-243	0.329493	0.245	0.082	2.34382e-237	rods	chr19-49393663-49398279	CCDC155	5446	distal
1.4794e-242	0.300148	0.411	0.194	5.62742e-237	rods	chr17-1995136-2003644	RTN4RL1	21702	distal
1.49426e-242	0.362913	0.234	0.067	5.68396e-237	rods	chr17-73742878-73745554	SDK2	-98789	distal
2.25196e-242	0.327759	0.187	0.05	8.56613e-237	rods	chr9-112570237-112572879	KIAA1958	83223	distal
2.47716e-242	0.363757	0.156	0.029	9.42275e-237	rods	chr2-135778395-135781396	UBXN4	36777	distal
4.86392e-242	0.33583	0.21	0.061	1.85016e-236	rods	chr5-74441023-74443005	HEXB	-197018	distal
4.95369e-242	0.34993	0.145	0.027	1.88431e-236	rods	chr6-119465749-119467100	MAN1A1	-115988	distal
5.11592e-242	0.357138	0.108	0.012	1.94602e-236	rods	chr2-46087461-46088660	PRKCE	86560	distal
9.6851e-242	0.310969	0.355	0.146	3.68407e-236	rods	chr15-78680403-78683104	CHRNB4	-39158	distal
9.75511e-242	0.339377	0.271	0.093	3.7107e-236	rods	chr11-77136086-77141322	MYO7A	7785	distal
2.19233e-241	0.301129	0.452	0.219	8.33928e-236	rods	chr16-1116082-1127709	C1QTNF8	-19838	distal
2.44838e-241	0.349664	0.136	0.023	9.31327e-236	rods	chr6-162571541-162572752	PACRG	-154380	distal
3.0205e-241	0.342628	0.248	0.079	1.14895e-235	rods	chr7-36838098-36840366	AOAH	-113549	distal
3.08189e-241	0.328408	0.206	0.06	1.17231e-235	rods	chr8-41330382-41334879	SFRP1	-20885	distal
3.42589e-241	0.278663	0.413	0.203	1.30316e-235	rods	chr6-10834433-10839229	MAK	0	promoter
3.53167e-241	0.300857	0.352	0.153	1.3434e-235	rods	chr10-96718539-96721539	PIK3AP1	0	promoter
5.76827e-241	0.320074	0.269	0.095	2.19416e-235	rods	chr5-113201710-113206268	MCC	28410	distal
6.12561e-241	0.346952	0.267	0.085	2.33009e-235	rods	chr10-69362175-69364825	HK1	43332	distal
6.50501e-241	0.335282	0.125	0.022	2.47441e-235	rods	chr6-33719185-33720464	UQCC2	-7458	distal
6.7988e-241	0.300983	0.243	0.084	2.58616e-235	rods	chr22-41401554-41403026	TEF	19626	distal
1.01874e-240	0.328929	0.16	0.036	3.87514e-235	rods	chr20-46352897-46354461	SLC35C2	8714	distal
1.08928e-240	0.26082	0.406	0.197	4.14347e-235	rods	chr20-32444503-32453025	NOL4L	21711	distal
1.3787e-240	0.324268	0.082	0.006	5.24436e-235	rods	chr6-137265450-137266407	IFNGR1	-46001	distal
1.82061e-240	0.343528	0.133	0.023	6.92534e-235	rods	chr5-133075325-133076735	HSPA4	23085	distal
1.1928e-239	0.334136	0.178	0.046	4.53722e-234	rods	chr19-44875575-44880660	TOMM40	-10560	distal
1.27909e-239	0.28401	0.367	0.164	4.86546e-234	rods	chr3-123109713-123112826	PDIA5	42644	distal
1.31299e-239	0.258925	0.385	0.19	4.99441e-234	rods	chr12-14256457-14259095	ATF7IP	-106537	distal
1.41371e-239	0.334195	0.212	0.062	5.37752e-234	rods	chr21-42200832-42202303	ABCG1	1144	distal
1.68996e-239	0.323139	0.139	0.028	6.42836e-234	rods	chr2-121350342-121352393	TFCP2L1	-65135	distal
1.96009e-239	0.341878	0.125	0.021	7.45588e-234	rods	chr8-23364596-23366851	LOXL2	37390	distal
2.16519e-239	0.317446	0.292	0.113	8.23604e-234	rods	chr13-113739442-113744704	TMEM255B	-14536	distal
2.84492e-239	0.34197	0.151	0.03	1.08216e-233	rods	chr9-682703-685475	KANK1	-21414	distal
2.92926e-239	0.28934	0.349	0.156	1.11425e-233	rods	chr4-48015273-48018984	CNGA1;NIPAL1	0	promoter
4.76636e-239	0.330902	0.193	0.052	1.81305e-233	rods	chr17-80269881-80271546	RNF213	9012	distal
7.19662e-239	0.303127	0.336	0.144	2.73749e-233	rods	chr15-78943701-78946322	CTSH	0	promoter
8.54253e-239	0.341462	0.172	0.042	3.24945e-233	rods	chr19-41130837-41133706	CYP2F1	16406	distal
8.56756e-239	0.3389	0.227	0.07	3.25897e-233	rods	chr12-131900302-131906944	ULK1	5652	distal
1.15319e-238	0.342338	0.186	0.048	4.38657e-233	rods	chr18-48816598-48821200	SMAD7	128134	distal
1.15481e-238	0.333758	0.205	0.056	4.39272e-233	rods	chr15-68990578-68992437	NOX5	-22258	distal
4.23566e-238	0.307602	0.331	0.141	1.61118e-232	rods	chr5-179163429-179168331	ZNF354C	103015	distal
6.70049e-238	0.361524	0.172	0.04	2.54876e-232	rods	chr5-135307069-135309228	H2AFY	89984	distal
7.02677e-238	0.353153	0.129	0.021	2.67288e-232	rods	chr7-7581340-7582208	MIOS	14466	distal
1.08279e-237	0.329617	0.131	0.024	4.11877e-232	rods	chr2-64459340-64460963	LGALSL	4799	distal
1.11192e-237	0.329704	0.206	0.061	4.22958e-232	rods	chr1-4071090-4073675	C1orf174	-170805	distal
1.37696e-237	0.287443	0.366	0.166	5.23775e-232	rods	chr12-4306971-4309010	TIGAR	0	promoter
1.99321e-237	0.356679	0.14	0.025	7.58185e-232	rods	chr12-84978535-84979392	TSPAN19	56866	distal
2.33247e-237	0.34615	0.187	0.048	8.87235e-232	rods	chr13-28375248-28376515	FLT1	-28959	distal
2.76362e-237	0.337999	0.132	0.023	1.05124e-231	rods	chr17-59436840-59438662	YPEL2	91685	distal
3.20462e-237	0.337311	0.246	0.079	1.21899e-231	rods	chr9-126015622-126017686			intergenic
3.44875e-237	0.307456	0.287	0.108	1.31185e-231	rods	chr9-128382000-128386168	URM1	10620	distal
3.75211e-237	0.386426	0.183	0.038	1.42725e-231	rods	chr6-39207231-39209566	KCNK5	19885	distal
3.7659e-237	0.344381	0.179	0.044	1.43249e-231	rods	chr6-142950957-142952971	HIVEP2	-4592	distal
5.99855e-237	0.340928	0.116	0.017	2.28176e-231	rods	chr19-31748988-31749972			intergenic
6.52355e-237	0.322519	0.246	0.083	2.48146e-231	rods	chr5-10532441-10536307	ANKRD33B	-28161	distal
1.0257e-236	0.332469	0.174	0.044	3.90161e-231	rods	chr10-129174001-129175170			intergenic
1.106e-236	0.355825	0.129	0.02	4.20707e-231	rods	chr14-95309977-95311209	CLMN	8698	distal
1.18354e-236	0.343608	0.181	0.044	4.50201e-231	rods	chr18-23093670-23095787	CABLES1	-38777	distal
1.49329e-236	0.251046	0.541	0.327	5.68024e-231	rods	chr15-73920492-73932119	LOXL1	0	promoter
1.49703e-236	0.331467	0.156	0.036	5.69449e-231	rods	chr13-45510179-45512069	COG3	45175	distal
3.21694e-236	0.349208	0.175	0.041	1.22368e-230	rods	chr9-19219191-19220327	DENND4C	-10108	distal
3.28333e-236	0.284187	0.325	0.142	1.24893e-230	rods	chr21-45009386-45013734	ADARB1	-60866	distal
3.67951e-236	0.32692	0.099	0.011	1.39963e-230	rods	chr11-130083983-130085378	APLP2	13416	distal
4.70664e-236	0.336278	0.24	0.079	1.79033e-230	rods	chr11-113386884-113390057	ANKK1	0	promoter
4.7918e-236	0.342802	0.139	0.026	1.82273e-230	rods	chr11-57680360-57682249	ZDHHC5	12465	distal
1.22117e-235	0.324586	0.11	0.016	4.64517e-230	rods	chr11-67761072-67762868	ALDH3B2	-79872	distal
1.28183e-235	0.35011	0.16	0.035	4.8759e-230	rods	chr8-134793105-134794201	ZFAT	-80067	distal
6.38619e-235	0.337693	0.102	0.012	2.42921e-229	rods	chr1-163310545-163311422	RGS5	10370	distal
7.37083e-235	0.340881	0.172	0.04	2.80375e-229	rods	chr5-175787736-175790006	CPLX2	-6304	distal
1.13411e-234	0.343057	0.116	0.017	4.31398e-229	rods	chr9-128548655-128549499	SPTAN1	-3059	distal
1.24768e-234	0.340134	0.165	0.039	4.74598e-229	rods	chr1-45512384-45514151	PRDX1	7704	distal
1.47095e-234	0.332137	0.135	0.025	5.59528e-229	rods	chr2-30310865-30313264	LBH	78686	distal
1.53257e-234	0.343599	0.171	0.04	5.82966e-229	rods	chr15-91112679-91115351	SV2B	12395	distal
1.61988e-234	0.331778	0.21	0.063	6.16178e-229	rods	chr2-216015442-216016698	MREG	-1819	distal
1.99134e-234	0.325527	0.135	0.026	7.57475e-229	rods	chr15-60672325-60674334	RORA	-44862	distal
2.45871e-234	0.317998	0.195	0.057	9.35258e-229	rods	chr17-68262154-68263890	ARSG	2973	distal
2.53715e-234	0.338911	0.12	0.019	9.65093e-229	rods	chr10-12644341-12645856	CAMK1D	-114720	distal
4.6745e-234	0.329414	0.132	0.025	1.77811e-228	rods	chr5-134429856-134430865	CDKN2AIPNL	-17958	distal
4.81291e-234	0.332793	0.124	0.021	1.83076e-228	rods	chr7-127947624-127949042	LRRC4	82029	distal
4.98117e-234	0.313306	0.088	0.009	1.89476e-228	rods	chr1-178705642-178706474	RALGPS2	-18673	distal
5.06259e-234	0.327717	0.18	0.048	1.92573e-228	rods	chr8-94254462-94257721	GEM	4625	distal
5.43693e-234	0.29759	0.384	0.173	2.06813e-228	rods	chr8-141785427-141794461			intergenic
1.29436e-233	0.351258	0.13	0.021	4.92355e-228	rods	chr11-40213319-40215869	LRRC4C	77262	distal
1.55583e-233	0.34751	0.17	0.04	5.91815e-228	rods	chr1-178618567-178619911	RALGPS2	-105236	distal
1.81558e-233	0.343462	0.14	0.027	6.9062e-228	rods	chr14-97929801-97930880			intergenic
2.70754e-233	0.335174	0.154	0.034	1.02991e-227	rods	chr19-46819933-46823692	AP2S1	22457	distal
2.79123e-233	0.299557	0.317	0.132	1.06174e-227	rods	chr12-5942300-5946226	ANO2	0	promoter
4.167e-233	0.355279	0.209	0.059	1.58506e-227	rods	chr19-18596406-18599115	C19orf60	7611	distal
1.31638e-232	0.30435	0.25	0.09	5.00733e-227	rods	chr9-89694177-89696336	GADD45G	89140	distal
1.4158e-232	0.326622	0.167	0.042	5.3855e-227	rods	chr18-36309193-36312426	FHOD3	11358	distal
1.4478e-232	0.338224	0.134	0.025	5.50721e-227	rods	chr22-41786355-41788040	CCDC134	-12639	distal
1.6343e-232	0.341333	0.263	0.085	6.21664e-227	rods	chr22-23844351-23847467	DERL3	-5339	distal
2.35701e-232	0.35293	0.131	0.022	8.96571e-227	rods	chr6-53640900-53642207	KLHL31	13066	distal
3.03311e-232	0.322504	0.162	0.04	1.15375e-226	rods	chr17-49208570-49211373	ABI3;GNGT2	0	promoter
3.16552e-232	0.318708	0.086	0.008	1.20412e-226	rods	chr9-2681657-2682459	KCNV2	-35043	distal
3.17336e-232	0.3225	0.107	0.016	1.2071e-226	rods	chr16-57969669-57971834	CNGB1	0	promoter
5.35487e-232	0.321937	0.109	0.016	2.03691e-226	rods	chr5-31881584-31882702			intergenic
6.94801e-232	0.326165	0.212	0.063	2.64292e-226	rods	chr2-23425146-23427089	KLHL29	39930	distal
2.26825e-231	0.341371	0.142	0.026	8.6281e-226	rods	chr9-129932507-129934374	USP20	97030	distal
4.00476e-231	0.328114	0.187	0.051	1.52335e-225	rods	chr11-47598676-47600433	C1QTNF4	-4017	distal
7.21743e-231	0.331288	0.149	0.032	2.7454e-225	rods	chr4-121876860-121877784	BBS7	-6363	distal
8.41967e-231	0.322014	0.214	0.065	3.20271e-225	rods	chr1-4355774-4361690			intergenic
9.68641e-231	0.329027	0.114	0.018	3.68456e-225	rods	chr15-80986473-80987563	MESDC2	2266	distal
2.84208e-230	0.348694	0.132	0.023	1.08108e-224	rods	chr13-41250556-41251527	MTRF1	11958	distal
3.58749e-230	0.337384	0.133	0.025	1.36463e-224	rods	chr2-237851273-237852880	RAMP1	-6013	distal
3.71715e-230	0.352793	0.113	0.016	1.41395e-224	rods	chr15-86076173-86077495	AGBL1	-2478	distal
5.52915e-230	0.324811	0.258	0.086	2.10321e-224	rods	chr22-19514332-19516643	CLDN5	7758	distal
8.21868e-230	0.28705	0.376	0.175	3.12626e-224	rods	chr19-35029446-35035256	SCN1B	0	promoter
9.37017e-230	0.328446	0.151	0.034	3.56427e-224	rods	chr22-42000826-42002160	WBP2NL	2039	distal
1.13994e-229	0.333092	0.177	0.044	4.33614e-224	rods	chr4-16148235-16150124	PROM1	-63857	distal
1.15782e-229	0.328343	0.174	0.044	4.40417e-224	rods	chr5-10511382-10514550	ANKRD33B	-49918	distal
1.4562e-229	0.334665	0.132	0.025	5.53918e-224	rods	chr20-853806-856837	FAM110A	12532	distal
2.05579e-229	0.321986	0.175	0.045	7.8199e-224	rods	chr1-38774988-38776474	RRAGC	83350	distal
2.25452e-229	0.342024	0.143	0.029	8.57586e-224	rods	chr11-422019-422895	SIGIRR	-4622	distal
3.75623e-229	0.336936	0.223	0.067	1.42881e-223	rods	chr12-132456226-132457626	FBRSL1	-31925	distal
4.08618e-229	0.332542	0.157	0.037	1.55432e-223	rods	chr14-93903280-93907153	FAM181A	-11741	distal
6.12099e-229	0.292017	0.512	0.266	2.32833e-223	rods	chr1-31663239-31675634	PEF1	-18352	distal
7.53199e-229	0.341645	0.128	0.021	2.86506e-223	rods	chr8-32108228-32109838			intergenic
9.41608e-229	0.334667	0.114	0.017	3.58174e-223	rods	chr16-28266968-28268108	SBK1	-24411	distal
1.30656e-228	0.304418	0.242	0.088	4.96997e-223	rods	chr11-112805284-112809903	NCAM1	-151344	distal
1.53329e-228	0.33222	0.205	0.06	5.83242e-223	rods	chr19-47813247-47814578	TPRX1	4474	distal
1.80394e-228	0.340883	0.156	0.034	6.86191e-223	rods	chr15-65579379-65581213	HACD3	28561	distal
1.89998e-228	0.308971	0.345	0.148	7.22725e-223	rods	chr8-141430106-141437522	PTP4A3	8089	distal
2.13288e-228	0.307346	0.193	0.058	8.11317e-223	rods	chr15-92314043-92318714	ST8SIA2	-75114	distal
3.99656e-228	0.324409	0.169	0.042	1.52023e-222	rods	chr7-148379321-148381679	CNTNAP2	39861	distal
4.71149e-228	0.250333	0.492	0.277	1.79218e-222	rods	chr11-67604268-67607877	NDUFV1	0	promoter
6.06654e-228	0.341786	0.199	0.053	2.30762e-222	rods	chr11-30406233-30409205	ARL14EP	83183	distal
6.20364e-228	0.341083	0.158	0.036	2.35977e-222	rods	chr12-49578283-49579619	MCRS1	-10130	distal
7.70618e-228	0.329345	0.121	0.019	2.93131e-222	rods	chr7-67792908-67794077			intergenic
9.46589e-228	0.328856	0.105	0.014	3.60068e-222	rods	chr5-67334091-67335257	CD180	-137292	distal
1.0261e-227	0.291617	0.209	0.072	3.90312e-222	rods	chr1-204621962-204625438	LRRN2	0	promoter
1.11824e-227	0.334624	0.257	0.082	4.25361e-222	rods	chr14-56741634-56743345	OTX2	62304	distal
1.46613e-227	0.34231	0.168	0.039	5.57692e-222	rods	chr1-22212046-22213422	WNT4	-69080	distal
1.81943e-227	0.318889	0.101	0.014	6.92082e-222	rods	chr1-185248570-185249964	IVNS1ABP	61164	distal
2.56848e-227	0.351137	0.139	0.025	9.77012e-222	rods	chr12-117819997-117821295	KSR2	146929	distal
4.83434e-227	0.374803	0.21	0.053	1.83891e-221	rods	chr11-61671371-61672396	DAGLA	-8037	distal
1.00952e-226	0.302566	0.495	0.253	3.84006e-221	rods	chr15-78636875-78643064	CHRNB4	0	promoter
1.96889e-226	0.332777	0.139	0.028	7.48936e-221	rods	chr10-87054572-87055840	FAM25A	34267	distal
2.07065e-226	0.314058	0.125	0.024	7.87643e-221	rods	chr2-239957778-239960037	NDUFA10	65270	distal
6.67186e-226	0.327619	0.13	0.025	2.53788e-220	rods	chr6-16734935-16737761	ATXN1	23696	distal
9.13709e-226	0.322574	0.189	0.053	3.47561e-220	rods	chr14-99879229-99881594	EML1	85887	distal
1.30388e-225	0.331579	0.155	0.034	4.95977e-220	rods	chr7-28279488-28282613	CREB5	-16708	distal
1.33232e-225	0.32162	0.102	0.014	5.06795e-220	rods	chr1-157449950-157451464	FCRL5	100992	distal
1.38402e-225	0.320609	0.127	0.024	5.2646e-220	rods	chr16-77747849-77749075	NUDT7	25305	distal
1.38833e-225	0.334567	0.138	0.027	5.281e-220	rods	chr12-5910718-5913381	ANO2	31879	distal
2.0318e-225	0.262209	0.442	0.228	7.72865e-220	rods	chr12-132520297-132535934	FBRSL1	13268	distal
2.48461e-225	0.335591	0.219	0.066	9.45108e-220	rods	chr17-50573666-50575093	CACNA1G	12207	distal
3.6906e-225	0.34036	0.161	0.037	1.40385e-219	rods	chr22-46568152-46571463	CELSR1	-30982	distal
5.63328e-225	0.346377	0.256	0.081	2.14281e-219	rods	chr9-132608597-132610158	BARHL1	25939	distal
6.08509e-225	0.339584	0.131	0.024	2.31468e-219	rods	chr2-210752131-210753176	CPS1	158766	distal
7.04532e-225	0.328638	0.107	0.015	2.67993e-219	rods	chr15-88982382-88983703	MFGE8	-68971	distal
7.21337e-225	0.332834	0.202	0.06	2.74386e-219	rods	chr11-126546239-126550556	ST3GAL4	139780	distal
9.99993e-225	0.325138	0.281	0.1	3.80382e-219	rods	chr15-88448425-88450647	MRPL46	16744	distal
1.03364e-224	0.349718	0.113	0.015	3.93182e-219	rods	chr3-155895193-155896248	GMPS	24544	distal
1.17348e-224	0.329083	0.122	0.02	4.46373e-219	rods	chr18-45771919-45772897	SLC14A1	41599	distal
1.27333e-224	0.322279	0.186	0.051	4.84355e-219	rods	chr2-181641725-181645841	CERKL	11166	distal
1.95587e-224	0.312789	0.29	0.111	7.43982e-219	rods	chr11-119863195-119866332	NECTIN1	-134111	distal
2.77155e-224	0.354473	0.17	0.039	1.05425e-218	rods	chr1-154719332-154721102	ADAR	-91368	distal
3.08461e-224	0.319834	0.11	0.018	1.17334e-218	rods	chr9-93492251-93493149	FAM120AOS	-38659	distal
3.36915e-224	0.309743	0.243	0.085	1.28157e-218	rods	chr11-119144529-119145906	ABCG4	-3106	distal
3.40309e-224	0.32504	0.184	0.052	1.29448e-218	rods	chr12-54133061-54136378	SMUG1	52230	distal
3.51514e-224	0.31563	0.102	0.015	1.3371e-218	rods	chr12-120673933-120674821	MLEC	-12048	distal
5.69754e-224	0.255344	0.456	0.251	2.16726e-218	rods	chr17-14308604-14311315	HS3ST3B1	7522	distal
1.07343e-223	0.271982	0.353	0.168	4.08317e-218	rods	chr11-131370056-131376560	NTM	0	promoter
1.71766e-223	0.36825	0.18	0.041	6.53371e-218	rods	chr2-174535062-174536719	GPR155	-47968	distal
2.71375e-223	0.330818	0.278	0.101	1.03227e-217	rods	chrX-1657215-1658738	ASMT	42041	distal
4.51042e-223	0.356422	0.215	0.059	1.7157e-217	rods	chr2-120589684-120592683	GLI2	-199726	distal
5.07531e-223	0.337216	0.214	0.061	1.93057e-217	rods	chr14-56758642-56761433	OTX2	44216	distal
5.5627e-223	0.328819	0.102	0.013	2.11597e-217	rods	chr12-13719800-13720776			intergenic
1.60287e-222	0.336092	0.12	0.019	6.09706e-217	rods	chr20-46999676-47000733	EYA2	9676	distal
1.66586e-222	0.320165	0.095	0.011	6.33666e-217	rods	chr5-151035926-151037152	GPX3	15321	distal
2.72233e-222	0.327649	0.126	0.024	1.03553e-216	rods	chr2-168239020-168240515	STK39	7627	distal
2.80698e-222	0.323537	0.194	0.055	1.06773e-216	rods	chr7-23393273-23395729	IGF2BP3	-45569	distal
4.74004e-222	0.337477	0.123	0.02	1.80304e-216	rods	chr9-105150433-105152037	SLC44A1	-92585	distal
1.03146e-221	0.304607	0.151	0.039	3.92354e-216	rods	chr9-89729129-89732390	GADD45G	124092	distal
1.63001e-221	0.299984	0.355	0.162	6.20031e-216	rods	chr1-15424097-15434027	CTRC	-4412	distal
2.68277e-221	0.319031	0.098	0.013	1.02048e-215	rods	chr2-171404041-171404706	METTL8	-11856	distal
4.84314e-221	0.323788	0.131	0.025	1.84226e-215	rods	chr16-66234759-66236806	CDH5	-129816	distal
5.00566e-221	0.321288	0.114	0.018	1.90408e-215	rods	chr7-45151204-45153535	RAMP3	-4256	distal
6.37309e-221	0.322452	0.254	0.088	2.42423e-215	rods	chr10-120127286-120128750			intergenic
9.90914e-221	0.309428	0.199	0.06	3.76929e-215	rods	chr9-131796657-131799621	RAPGEF1	-56583	distal
1.15361e-220	0.312722	0.231	0.077	4.38815e-215	rods	chr16-12424448-12426914			intergenic
1.24186e-220	0.301482	0.088	0.01	4.72385e-215	rods	chr2-27654577-27655651	SLC4A1AP	-7820	distal
1.35184e-220	0.324417	0.095	0.011	5.14219e-215	rods	chr2-208276445-208277264	PIKFYVE	10168	distal
1.82432e-220	0.300941	0.082	0.008	6.93942e-215	rods	chrX-32817223-32818671			intergenic
2.10622e-220	0.318738	0.112	0.019	8.01176e-215	rods	chr7-26428389-26429250	SNX10	64065	distal
3.49783e-220	0.318495	0.203	0.061	1.33052e-214	rods	chr11-20342287-20343582	HTATIP2	-20103	distal
6.21294e-220	0.331161	0.212	0.062	2.36331e-214	rods	chr22-29733022-29735723	CABP7	12939	distal
8.23486e-220	0.317462	0.152	0.037	3.13242e-214	rods	chr15-41885678-41888048	SPTBN5	6030	distal
1.12379e-219	0.32057	0.205	0.061	4.27473e-214	rods	chr1-18198153-18200546	IGSF21	90408	distal
1.5181e-219	0.319587	0.155	0.038	5.77464e-214	rods	chr17-14759995-14761384			intergenic
1.54848e-219	0.33642	0.113	0.016	5.89019e-214	rods	chr20-48554219-48555643			intergenic
2.04649e-219	0.317653	0.136	0.029	7.78455e-214	rods	chr20-63898627-63899824	DNAJC5	3446	distal
2.91571e-219	0.305793	0.272	0.103	1.10909e-213	rods	chr12-130702725-130707311	RIMBP2	8971	distal
3.26805e-219	0.292821	0.081	0.009	1.24312e-213	rods	chr8-126488019-126488798	FAM84B	69596	distal
5.22995e-219	0.298897	0.298	0.116	1.9894e-213	rods	chr16-29819467-29826649	MVP	0	promoter
5.26745e-219	0.309181	0.184	0.054	2.00366e-213	rods	chr14-65849087-65851310			intergenic
5.38553e-219	0.322004	0.152	0.033	2.04857e-213	rods	chr14-22500382-22503017	TRAJ38;TRAJ39	0	promoter
6.22076e-219	0.322746	0.195	0.056	2.36628e-213	rods	chr17-75479858-75482369	KIAA0195	3361	distal
8.45875e-219	0.314053	0.378	0.158	3.21758e-213	rods	chr2-26735029-26742686	SLC35F6	-21602	distal
1.4816e-218	0.32066	0.168	0.044	5.63578e-213	rods	chr15-76195261-76198270	ETFA	113135	distal
1.59317e-218	0.310958	0.164	0.042	6.06018e-213	rods	chr3-133361228-133363384	BFSP2	-36611	distal
2.0128e-218	0.309638	0.256	0.091	7.65639e-213	rods	chr17-45770160-45772099	CRHR1	-12181	distal
2.02231e-218	0.321387	0.217	0.069	7.69255e-213	rods	chr3-14283751-14287566	XPC	-104968	distal
3.16377e-218	0.313217	0.179	0.048	1.20345e-212	rods	chr1-11214636-11217374	ANGPTL7	25296	distal
3.44812e-218	0.295561	0.335	0.146	1.31161e-212	rods	chr16-87820770-87825969	SLC7A5	37671	distal
5.90604e-218	0.332674	0.156	0.036	2.24657e-212	rods	chr6-56572838-56574002	DST	68859	distal
1.42746e-217	0.310583	0.103	0.017	5.42983e-212	rods	chr2-3480419-3481455	ADI1	36293	distal
2.14058e-217	0.313626	0.142	0.031	8.14245e-212	rods	chr15-65114383-65116168	UBAP1L	0	promoter
2.54488e-217	0.33585	0.106	0.014	9.68032e-212	rods	chr8-26668294-26669716	DPYSL2	89890	distal
2.84603e-217	0.275641	0.23	0.085	1.08259e-211	rods	chr20-63152961-63156903	YTHDF1	59237	distal
5.9637e-217	0.33714	0.173	0.042	2.2685e-211	rods	chr13-52117882-52119231	NEK5	8252	distal
6.02792e-217	0.326038	0.219	0.068	2.29293e-211	rods	chr9-122369595-122373141	PTGS1	0	promoter
6.65792e-217	0.315549	0.093	0.012	2.53257e-211	rods	chr17-28601971-28602920	SPAG5	-2692	distal
7.12824e-217	0.251876	0.401	0.206	2.71148e-211	rods	chr2-26720004-26729133	KCNK3	27254	distal
8.25157e-217	0.33146	0.13	0.024	3.13877e-211	rods	chr3-183709770-183711347	YEATS2	11953	distal
1.21222e-216	0.298552	0.106	0.019	4.6111e-211	rods	chr19-36059112-36060934	WDR62	4141	distal
1.32081e-216	0.300461	0.343	0.15	5.02416e-211	rods	chr9-128920380-128923973	PHYHD1	0	promoter
1.34961e-216	0.325209	0.099	0.013	5.13372e-211	rods	chr16-30691558-30692546	SRCAP	-6595	distal
1.52026e-216	0.308032	0.188	0.058	5.78283e-211	rods	chr2-234998276-235001601	SH3BP4	19574	distal
1.87522e-216	0.318765	0.109	0.017	7.13304e-211	rods	chr15-90560329-90562285	CRTC3	30262	distal
1.93566e-216	0.262961	0.421	0.222	7.36297e-211	rods	chr9-123265493-123270422	STRBP	0	promoter
2.36732e-216	0.293031	0.235	0.085	9.00492e-211	rods	chr17-50796419-50801194	AC005921.2	-28862	distal
3.97565e-216	0.353824	0.115	0.015	1.51228e-210	rods	chr9-70856267-70857277	TRPM3	5634	distal
4.73876e-216	0.311148	0.124	0.025	1.80255e-210	rods	chr5-76546706-76549295	IQGAP2	0	promoter
5.67868e-216	0.315797	0.237	0.083	2.16009e-210	rods	chr7-30930395-30934669	AQP1	8906	distal
6.3296e-216	0.319618	0.127	0.025	2.40768e-210	rods	chr14-65260581-65262469	FUT8	-148123	distal
9.36917e-216	0.312088	0.154	0.038	3.56389e-210	rods	chr14-23279835-23281687	HOMEZ	4431	distal
9.40845e-216	0.349155	0.13	0.023	3.57883e-210	rods	chr17-37859264-37860997	TBC1D3K	-63418	distal
9.79379e-216	0.325215	0.142	0.031	3.72541e-210	rods	chr10-71381310-71382270	CDH23	-14664	distal
1.17044e-215	0.310096	0.178	0.053	4.45217e-210	rods	chr9-76866690-76869592	PRUNE2	36450	distal
1.65492e-215	0.308002	0.125	0.024	6.29508e-210	rods	chr17-55510820-55512144	RP11-515E23.1	0	promoter
2.00748e-215	0.269671	0.37	0.18	7.63615e-210	rods	chr19-3439788-3446118	SMIM24	32371	distal
2.04253e-215	0.288112	0.079	0.009	7.76949e-210	rods	chr17-64095311-64096525	ERN1	33601	distal
2.43036e-215	0.327316	0.14	0.03	9.24474e-210	rods	chr16-56480760-56481857	OGFOD1	29199	distal
2.8281e-215	0.309868	0.248	0.089	1.07577e-209	rods	chr1-36850036-36853924	GRIK3	180202	distal
2.90325e-215	0.288265	0.343	0.15	1.10435e-209	rods	chr2-29009371-29013619	TOGARAM2	28074	distal
2.92747e-215	0.328214	0.129	0.024	1.11356e-209	rods	chr2-4947816-4948854			intergenic
2.96917e-215	0.278465	0.419	0.212	1.12943e-209	rods	chr8-143988962-143997111	GRINA	0	promoter
3.85131e-215	0.331591	0.343	0.138	1.46498e-209	rods	chr19-39319370-39322225	LRFN1	-4034	distal
4.15556e-215	0.329246	0.154	0.035	1.58071e-209	rods	chr5-168790096-168791568	SLIT3	91771	distal
5.41382e-215	0.255799	0.451	0.234	2.05934e-209	rods	chr2-26605191-26618760	CIB4	22609	distal
5.84154e-215	0.318279	0.088	0.009	2.22203e-209	rods	chr20-49493150-49494307	KCNB1	-8853	distal
6.78566e-215	0.342435	0.284	0.101	2.58117e-209	rods	chr11-1231120-1237345	MUC5B	8055	distal
7.31476e-215	0.328959	0.205	0.059	2.78243e-209	rods	chr16-28930240-28933680	CD19	0	promoter
8.84719e-215	0.33086	0.243	0.078	3.36534e-209	rods	chr20-46799535-46804583	SLC2A10	89837	distal
9.2535e-215	0.313549	0.121	0.023	3.51989e-209	rods	chr1-198848755-198849667			intergenic
1.04405e-214	0.346046	0.159	0.035	3.9714e-209	rods	chr3-142238928-142240711	GK5	-13321	distal
1.22058e-214	0.324541	0.135	0.027	4.64291e-209	rods	chr6-119501641-119503317	MAN1A1	-151880	distal
1.25508e-214	0.323901	0.206	0.062	4.77412e-209	rods	chr14-68779802-68783147	ZFP36L1	8097	distal
1.76857e-214	0.317144	0.178	0.047	6.72736e-209	rods	chr9-14451781-14454447	NFIB	-52798	distal
2.03197e-214	0.304772	0.148	0.037	7.72932e-209	rods	chr1-170048654-170049938	KIFAP3	18980	distal
2.20953e-214	0.296561	0.218	0.076	8.4047e-209	rods	chr14-69635622-69639282	SUSD6	24027	distal
2.86643e-214	0.308958	0.09	0.011	1.09035e-208	rods	chr12-21338034-21339208	SLCO1A2	-3134	distal
3.58453e-214	0.317729	0.157	0.039	1.3635e-208	rods	chr10-12628676-12630135	CAMK1D	-130441	distal
4.09369e-214	0.31966	0.147	0.034	1.55718e-208	rods	chr22-44222052-44224473	PARVG	40192	distal
4.09933e-214	0.313988	0.103	0.016	1.55932e-208	rods	chr2-68188158-68190545	PNO1	30315	distal
4.52226e-214	0.317853	0.205	0.061	1.7202e-208	rods	chr9-33239560-33241269	SPINK4	0	promoter
4.56377e-214	0.317859	0.165	0.042	1.73599e-208	rods	chr6-33594525-33595793	BAK1	-14232	distal
5.44391e-214	0.3151	0.113	0.019	2.07078e-208	rods	chr14-57089696-57090924	EXOC5	177976	distal
6.14575e-214	0.306311	0.106	0.018	2.33775e-208	rods	chr22-17466765-17467942	CECR2	-9151	distal
6.44002e-214	0.304802	0.148	0.036	2.44969e-208	rods	chr12-78799255-78801056	SYT1	-62937	distal
7.70063e-214	0.309931	0.106	0.018	2.9292e-208	rods	chr6-131000131-131001553	EPB41L2	0	promoter
7.84113e-214	0.321794	0.108	0.017	2.98265e-208	rods	chr8-95197884-95198995	PLEKHF2	63809	distal
1.31773e-213	0.326121	0.162	0.039	5.01243e-208	rods	chr11-6596047-6597769	RRP8	5811	distal
2.06321e-213	0.306518	0.186	0.055	7.84814e-208	rods	chr6-138289706-138292345	PBOV1	-71215	distal
2.78417e-213	0.311776	0.139	0.032	1.05906e-207	rods	chr4-186037690-186039000	TLR3	-30152	distal
3.93556e-213	0.306363	0.088	0.011	1.49703e-207	rods	chr20-33454613-33455577	SNTA1	-10721	distal
3.95448e-213	0.316076	0.184	0.049	1.50422e-207	rods	chr5-176405684-176407403	CLTB	9167	distal
4.6042e-213	0.327076	0.101	0.013	1.75137e-207	rods	chr1-69324327-69325199			intergenic
6.37115e-213	0.299809	0.088	0.011	2.42349e-207	rods	chr20-61824259-61825191			intergenic
6.64092e-213	0.324152	0.267	0.093	2.52611e-207	rods	chr1-160365218-160369028	NHLH1	0	promoter
8.85976e-213	0.313506	0.109	0.018	3.37012e-207	rods	chr17-14644426-14645226			intergenic
9.38119e-213	0.351671	0.118	0.017	3.56846e-207	rods	chr6-132362447-132363288	MOXD1	11778	distal
9.61674e-213	0.312748	0.123	0.024	3.65806e-207	rods	chr14-94016250-94017957	OTUB2	-8372	distal
9.96651e-213	0.333877	0.139	0.028	3.79111e-207	rods	chr8-28271409-28272199	PNOC	-44933	distal
1.58291e-212	0.297003	0.194	0.063	6.02115e-207	rods	chr9-214309-217545	C9orf66;DOCK8	0	promoter
1.61522e-212	0.304748	0.167	0.045	6.14407e-207	rods	chr16-9406073-9409288			intergenic
1.63169e-212	0.322825	0.192	0.056	6.20672e-207	rods	chr9-91772939-91776266	ROR2	172615	distal
1.86005e-212	0.322959	0.167	0.042	7.07535e-207	rods	chr5-149310009-149312315	GRPEL2	-33115	distal
2.14813e-212	0.306977	0.103	0.016	8.17117e-207	rods	chr9-98363881-98364689	TBC1D2	-108160	distal
3.07584e-212	0.298267	0.091	0.013	1.17e-206	rods	chr5-126732579-126733315	LMNB1	-43833	distal
5.19635e-212	0.321089	0.13	0.026	1.97661e-206	rods	chr14-51218760-51220258	TMX1	-19910	distal
5.45081e-212	0.311747	0.074	0.005	2.07341e-206	rods	chr18-45859169-45860290	SIGLEC15	30079	distal
5.65099e-212	0.307725	0.086	0.01	2.14955e-206	rods	chr8-97023338-97024271			intergenic
6.91769e-212	0.265352	0.394	0.204	2.63139e-206	rods	chr22-39149783-39153897	CBX7	0	promoter
6.93246e-212	0.328553	0.162	0.039	2.63701e-206	rods	chr2-30325479-30326682	LBH	93300	distal
8.29561e-212	0.29306	0.252	0.096	3.15552e-206	rods	chr4-15468507-15471437	CC2D2A	0	promoter
1.12606e-211	0.316982	0.111	0.019	4.28336e-206	rods	chr3-48441613-48442519	TMA7	1357	distal
1.21992e-211	0.329807	0.118	0.02	4.64041e-206	rods	chr1-41789562-41790568	HIVEP3	-127237	distal
1.88575e-211	0.29521	0.076	0.007	7.17311e-206	rods	chr16-29208929-29210306	NPIPB11	187391	distal
2.70779e-211	0.28797	0.301	0.13	1.03e-205	rods	chr16-2979535-2982361	PKMYT1	0	promoter
2.95417e-211	0.333503	0.227	0.071	1.12372e-205	rods	chr6-21884949-21888120			intergenic
3.9342e-211	0.310487	0.164	0.044	1.49651e-205	rods	chr1-11518142-11520620	DISP3	-13056	distal
6.99217e-211	0.333248	0.173	0.046	2.65972e-205	rods	chr3-123633957-123637930	MYLK	-8641	distal
9.34479e-211	0.308398	0.086	0.01	3.55462e-205	rods	chr1-44225442-44226789	DMAP1	11952	distal
9.78321e-211	0.305856	0.275	0.106	3.72139e-205	rods	chr9-131761850-131763902	RAPGEF1	-21776	distal
1.14634e-210	0.327758	0.105	0.014	4.3605e-205	rods	chr17-55480546-55481706	RP11-515E23.1	29739	distal
1.35575e-210	0.318131	0.107	0.017	5.15708e-205	rods	chr9-114402753-114404329	AKNA	-8348	distal
2.04257e-210	0.334933	0.161	0.037	7.76963e-205	rods	chr20-58977591-58979457	NELFCD	-1751	distal
2.35766e-210	0.315523	0.139	0.03	8.96819e-205	rods	chr10-63585944-63588045	REEP3	64582	distal
2.99972e-210	0.306466	0.101	0.016	1.14105e-204	rods	chr18-13514186-13515335	LDLRAD4	-96129	distal
3.58894e-210	0.287049	0.367	0.171	1.36518e-204	rods	chr17-73951627-73953538			intergenic
4.75613e-210	0.310197	0.25	0.091	1.80916e-204	rods	chr1-158057874-158062767	KIRREL	-23913	distal
4.95584e-210	0.314683	0.195	0.059	1.88513e-204	rods	chr17-17913577-17914755	TOM1L2	-41513	distal
5.97914e-210	0.310522	0.099	0.014	2.27437e-204	rods	chr16-27498553-27500111	GTF3C1	49796	distal
6.81084e-210	0.265437	0.477	0.263	2.59074e-204	rods	chr17-75890479-75898628	TRIM65	0	promoter
7.11721e-210	0.32471	0.098	0.013	2.70728e-204	rods	chr2-68090562-68092183	C1D	-27537	distal
7.16182e-210	0.319607	0.14	0.03	2.72425e-204	rods	chr1-235834563-235835915	LYST	31006	distal
7.43129e-210	0.326379	0.175	0.046	2.82675e-204	rods	chr5-10479251-10481775	ROPN1L	37376	distal
9.74716e-210	0.335982	0.144	0.03	3.70767e-204	rods	chr2-177292047-177293878	NFE2L2	-26916	distal
9.89115e-210	0.302196	0.084	0.009	3.76244e-204	rods	chr13-93190580-93191396	GPC6	-35446	distal
1.48095e-209	0.331468	0.188	0.049	5.63333e-204	rods	chr5-12015651-12017536	CTNND2	-111608	distal
1.85381e-209	0.304188	0.096	0.014	7.05162e-204	rods	chr15-91483988-91484864			intergenic
2.63195e-209	0.306474	0.107	0.019	1.00115e-203	rods	chr7-55361610-55363612	LANCL2	-1836	distal
3.76063e-209	0.304861	0.179	0.054	1.43049e-203	rods	chr11-72701347-72705102	ARAP1	-1259	distal
4.82566e-209	0.318538	0.127	0.026	1.83561e-203	rods	chr1-3207779-3209597	PRDM16	138569	distal
5.14328e-209	0.28892	0.223	0.079	1.95643e-203	rods	chr10-48272948-48275428	FRMPD2	0	promoter
7.42895e-209	0.298987	0.137	0.032	2.82586e-203	rods	chr5-146827223-146828875	PPP2R2B	49768	distal
9.71512e-209	0.306241	0.26	0.092	3.69549e-203	rods	chr17-842916-844334	NXN	19764	distal
1.23478e-208	0.323599	0.128	0.025	4.69693e-203	rods	chr15-67174805-67177229	SMAD3	8787	distal
1.53509e-208	0.319636	0.158	0.039	5.83925e-203	rods	chr3-57545539-57547153	DNAH12	-1195	distal
1.75448e-208	0.329276	0.151	0.035	6.67378e-203	rods	chr5-14046189-14047362	TRIO	-96340	distal
1.83413e-208	0.29561	0.078	0.008	6.97677e-203	rods	chr7-67647182-67648047			intergenic
2.67237e-208	0.303253	0.12	0.023	1.01653e-202	rods	chr22-29994415-29995600	MTMR3	23365	distal
3.67173e-208	0.334916	0.112	0.017	1.39667e-202	rods	chr17-4547264-4548427	MYBBP1A	6960	distal
4.05683e-208	0.30203	0.112	0.021	1.54316e-202	rods	chr12-128512850-128514501			intergenic
4.5507e-208	0.309895	0.123	0.024	1.73102e-202	rods	chr1-179145636-179147170	ABL2	-2547	distal
4.60717e-208	0.308731	0.111	0.019	1.7525e-202	rods	chr22-17699276-17700403	BCL2L13	60466	distal
4.66563e-208	0.325183	0.16	0.04	1.77473e-202	rods	chr5-96718728-96722183	CAST	15923	distal
6.97556e-208	0.326973	0.116	0.019	2.6534e-202	rods	chr1-24562286-24563387	NCMAP	6176	distal
7.22447e-208	0.289486	0.066	0.004	2.74808e-202	rods	chr1-5304607-5305233			intergenic
8.33735e-208	0.318971	0.16	0.039	3.1714e-202	rods	chr20-57097157-57098287	BMP7	168056	distal
8.51611e-208	0.326541	0.185	0.05	3.2394e-202	rods	chr11-68802849-68805181	CPT1A	-3581	distal
1.31196e-207	0.31295	0.11	0.019	4.99049e-202	rods	chr16-30688435-30689328	SRCAP	-9813	distal
1.45995e-207	0.322631	0.2	0.059	5.55344e-202	rods	chr18-50038119-50040625	MYO5B	154469	distal
1.70513e-207	0.323284	0.15	0.036	6.48607e-202	rods	chr12-53454287-53455261	PCBP2	0	promoter
3.79629e-207	0.345278	0.129	0.022	1.44405e-201	rods	chr12-106830189-106831853	RIC8B	55444	distal
5.80135e-207	0.323093	0.179	0.048	2.20675e-201	rods	chr1-89990819-89992221	ZNF326	-2894	distal
6.70501e-207	0.308953	0.109	0.019	2.55049e-201	rods	chr1-235995191-235996490	NID1	68620	distal
7.04075e-207	0.320402	0.147	0.033	2.67819e-201	rods	chr6-169851371-169852859	ERMARD	99575	distal
1.14218e-206	0.323177	0.203	0.063	4.34467e-201	rods	chr4-10048942-10052387	SLC2A9	2489	distal
1.40483e-206	0.331333	0.15	0.032	5.34375e-201	rods	chr17-30443482-30444448	GOSR1	-32914	distal
9.96567e-206	0.33157	0.178	0.046	3.79079e-200	rods	chr13-26539812-26542142	WASF3	-15561	distal
1.54299e-205	0.301119	0.158	0.043	5.8693e-200	rods	chr2-168533823-168535692	CERS6	77575	distal
1.5568e-205	0.325702	0.206	0.062	5.92182e-200	rods	chr3-53938505-53940200	RP11-884K10.5	-46517	distal
1.5863e-205	0.300868	0.169	0.047	6.03404e-200	rods	chr3-133374672-133378029	BFSP2	-21966	distal
2.29671e-205	0.29158	0.268	0.103	8.73636e-200	rods	chr3-13207338-13211183	IQSEC1	-134221	distal
3.76659e-205	0.301499	0.101	0.017	1.43275e-199	rods	chr17-14381366-14382291	HS3ST3B1	80284	distal
4.33622e-205	0.300263	0.128	0.028	1.64943e-199	rods	chr2-26011601-26012907	RAB10	-21203	distal
6.23431e-205	0.300923	0.14	0.034	2.37144e-199	rods	chr2-66361819-66363430	MEIS1	-71703	distal
7.70328e-205	0.296056	0.102	0.017	2.93021e-199	rods	chr6-73630064-73631023	SLC17A5	23133	distal
8.40099e-205	0.329084	0.147	0.032	3.19561e-199	rods	chr8-80195501-80197352	TPD52	-23842	distal
1.01573e-204	0.325295	0.133	0.027	3.86368e-199	rods	chr5-127857808-127858959	CCDC192	154420	distal
1.12408e-204	0.303411	0.106	0.018	4.27584e-199	rods	chr14-67566410-67568107	PIGH	32161	distal
1.81895e-204	0.299284	0.092	0.013	6.91902e-199	rods	chr9-73822354-73823122			intergenic
2.96792e-204	0.332312	0.132	0.025	1.12895e-198	rods	chr18-50760327-50761371	MRO	58558	distal
3.87706e-204	0.289148	0.223	0.077	1.47477e-198	rods	chr4-2885973-2887953	ADD1	10078	distal
4.71194e-204	0.321001	0.164	0.043	1.79235e-198	rods	chr1-163537415-163539259			intergenic
6.04419e-204	0.310045	0.128	0.027	2.29912e-198	rods	chr8-66784992-66787037	SGK3	-6577	distal
8.75663e-204	0.288956	0.102	0.018	3.33089e-198	rods	chr20-10235907-10238091	SNAP25	17075	distal
1.02387e-203	0.310687	0.139	0.032	3.89466e-198	rods	chr18-37338615-37341578			intergenic
1.49699e-203	0.279219	0.236	0.092	5.69434e-198	rods	chr3-170037378-170041197	GPR160	0	promoter
2.68597e-203	0.339856	0.137	0.028	1.0217e-197	rods	chr3-55683417-55684951	WNT5A	-193472	distal
3.01344e-203	0.261609	0.31	0.145	1.14627e-197	rods	chr16-88684796-88689131	SNAI3	0	promoter
3.07096e-203	0.307329	0.218	0.072	1.16815e-197	rods	chr3-35504791-35505995	ARPP21	-133594	distal
3.48092e-203	0.317824	0.126	0.025	1.32409e-197	rods	chr20-32642110-32643315	C20orf203	8445	distal
4.31167e-203	0.258976	0.376	0.192	1.64009e-197	rods	chr17-58351546-58353422	SUPT4H1	0	promoter
4.3787e-203	0.297613	0.098	0.016	1.66559e-197	rods	chr8-358936-359601	FBXO25	-47207	distal
4.55289e-203	0.320881	0.187	0.052	1.73185e-197	rods	chr6-106038414-106040803	PRDM1	-45517	distal
6.30654e-203	0.296284	0.139	0.035	2.39891e-197	rods	chr5-38378069-38380003	EGFLAM	-23538	distal
6.43032e-203	0.297204	0.225	0.075	2.446e-197	rods	chr15-65641403-65642817	SLC24A1	17323	distal
8.972e-203	0.293982	0.218	0.074	3.41282e-197	rods	chr1-10812675-10815131	CASZ1	-16025	distal
1.4493e-202	0.340956	0.224	0.067	5.5129e-197	rods	chr18-32753231-32755354	KLHL14	17526	distal
1.93241e-202	0.297994	0.083	0.009	7.3506e-197	rods	chr4-14705220-14706217			intergenic
1.9665e-202	0.3126	0.107	0.017	7.48028e-197	rods	chr3-172777606-172778844	ECT2	23150	distal
2.06918e-202	0.278854	0.269	0.111	7.87084e-197	rods	chr18-50192924-50195878	MYO5B	0	promoter
2.26316e-202	0.308069	0.141	0.033	8.60872e-197	rods	chr1-43082243-43083363	FAM183A	-61790	distal
2.55576e-202	0.338697	0.147	0.031	9.72174e-197	rods	chr14-105052906-105054325	GPR132	11106	distal
2.55743e-202	0.325515	0.103	0.014	9.72809e-197	rods	chr11-10331317-10332368	ADM	25941	distal
2.74004e-202	0.306284	0.099	0.015	1.04227e-196	rods	chr1-39425027-39425743	MACF1	14762	distal
3.21114e-202	0.293309	0.125	0.029	1.22147e-196	rods	chr1-26180583-26182771	CNKSR1	416	distal
7.02231e-202	0.312069	0.141	0.032	2.67118e-196	rods	chr1-22606025-22609773	C1QA	-26733	distal
9.3558e-202	0.29525	0.099	0.017	3.55881e-196	rods	chr3-120701993-120702807	HGD	-19422	distal
1.26776e-201	0.3132	0.161	0.042	4.82238e-196	rods	chr10-109392961-109394341			intergenic
1.42856e-201	0.285052	0.252	0.095	5.43402e-196	rods	chr17-73536022-73537971	SDK2	106119	distal
1.53307e-201	0.333667	0.278	0.098	5.83158e-196	rods	chr3-77079614-77082586	ROBO2	38885	distal
1.62853e-201	0.281824	0.319	0.137	6.19468e-196	rods	chr21-45614878-45619525	PCBP3	-24169	distal
2.13798e-201	0.251649	0.364	0.179	8.13255e-196	rods	chr11-59753696-59760576	STX3	0	promoter
2.86863e-201	0.316716	0.144	0.033	1.09118e-195	rods	chr21-39430144-39431443	LCA5L	-1622	distal
2.89402e-201	0.304099	0.094	0.014	1.10084e-195	rods	chr3-52524563-52527360	NT5DC2	6418	distal
2.96637e-201	0.294186	0.244	0.09	1.12836e-195	rods	chr5-179973281-179976480	TBC1D9B	-65422	distal
3.12513e-201	0.305477	0.096	0.014	1.18875e-195	rods	chr17-61553994-61555645	NACA2	35558	distal
3.19792e-201	0.300389	0.146	0.035	1.21644e-195	rods	chr3-97910777-97912113	RIOX2	59975	distal
4.0046e-201	0.290676	0.203	0.068	1.52329e-195	rods	chr11-17000609-17003122	PLEKHA7	11291	distal
4.79514e-201	0.320749	0.154	0.036	1.824e-195	rods	chr9-27644698-27646039	C9orf72	-70832	distal
5.93727e-201	0.333706	0.258	0.089	2.25845e-195	rods	chr18-46480084-46483862	LOXHD1	35216	distal
6.74902e-201	0.342031	0.114	0.017	2.56723e-195	rods	chr16-22213518-22214470	EEF2K	7237	distal
7.04806e-201	0.303051	0.163	0.045	2.68098e-195	rods	chr10-77408671-77414506	KCNMA1	-4646	distal
8.17013e-201	0.318837	0.125	0.024	3.10779e-195	rods	chr1-156995979-156998379	ARHGEF11	46695	distal
9.21126e-201	0.317117	0.162	0.04	3.50383e-195	rods	chr1-180298219-180300427	LHX4	67934	distal
9.24776e-201	0.280096	0.215	0.077	3.51771e-195	rods	chr14-102045944-102047193	HSP90AA1	39999	distal
1.13395e-200	0.324949	0.15	0.035	4.31336e-195	rods	chr9-113343376-113344432	WDR31	-3094	distal
1.16916e-200	0.298652	0.213	0.07	4.44732e-195	rods	chr3-9215432-9218745	SRGAP3	30469	distal
1.21212e-200	0.302069	0.096	0.014	4.61072e-195	rods	chr2-236951875-236953003	COPS8	-132309	distal
1.24645e-200	0.332486	0.158	0.036	4.74129e-195	rods	chr6-105727712-105729485			intergenic
1.46751e-200	0.289732	0.071	0.006	5.5822e-195	rods	chr4-5690299-5691989	EVC2	16579	distal
1.51441e-200	0.326799	0.132	0.026	5.7606e-195	rods	chr3-15778162-15779235	ANKRD28	18950	distal
1.71088e-200	0.30508	0.144	0.035	6.50792e-195	rods	chr8-66559030-66561137	MYBL1	51771	distal
2.12745e-200	0.321019	0.192	0.057	8.0925e-195	rods	chr5-179184710-179188153	ZNF354C	124296	distal
2.50778e-200	0.343388	0.174	0.043	9.53921e-195	rods	chr20-48603061-48604253			intergenic
2.91167e-200	0.317655	0.162	0.04	1.10756e-194	rods	chr20-32685265-32686531	C20orf203	-11324	distal
3.23689e-200	0.329167	0.11	0.016	1.23126e-194	rods	chr2-131372305-131373194	AC073869.1	-8163	distal
3.51086e-200	0.295242	0.107	0.02	1.33548e-194	rods	chr17-72419456-72421724			intergenic
5.81529e-200	0.267372	0.309	0.144	2.21205e-194	rods	chr6-158868938-158870615	EZR	-49526	distal
6.02068e-200	0.308616	0.281	0.111	2.29018e-194	rods	chr2-70981766-70987476	ANKRD53	3155	distal
8.46651e-200	0.302143	0.209	0.07	3.22053e-194	rods	chr4-139744008-139747335	MGST2	78174	distal
8.87572e-200	0.302174	0.141	0.034	3.37619e-194	rods	chr12-128585117-128587854			intergenic
1.05061e-199	0.316379	0.107	0.017	3.99636e-194	rods	chr7-121822280-121823597	PTPRZ1	-49492	distal
1.12145e-199	0.306302	0.184	0.054	4.26584e-194	rods	chr7-33841151-33843409	BMPER	-61502	distal
1.57756e-199	0.333685	0.154	0.036	6.00081e-194	rods	chr11-123628732-123630983	GRAMD1B	20924	distal
1.80052e-199	0.323294	0.105	0.016	6.84892e-194	rods	chr2-136664561-136666212	THSD7B	-99333	distal
2.26928e-199	0.263257	0.244	0.103	8.63201e-194	rods	chr7-73768499-73771694	CLDN3	0	promoter
2.33177e-199	0.279737	0.076	0.009	8.86971e-194	rods	chr14-60470365-60471204	C14orf39	14893	distal
2.68293e-199	0.318151	0.142	0.032	1.02055e-193	rods	chr22-35442053-35443304	MCM5	41917	distal
2.68714e-199	0.301732	0.224	0.075	1.02215e-193	rods	chr10-84238621-84242512	LRIT1	0	promoter
2.73773e-199	0.316272	0.285	0.107	1.04139e-193	rods	chr9-134187826-134190960	WDR5	51739	distal
4.50508e-199	0.312358	0.172	0.048	1.71366e-193	rods	chr2-3940223-3941513			intergenic
5.71018e-199	0.284385	0.244	0.096	2.17207e-193	rods	chr20-46347322-46352109	SLC35C2	11066	distal
7.38791e-199	0.319967	0.163	0.042	2.81025e-193	rods	chr17-57592688-57594826	CCDC182	150487	distal
8.3709e-199	0.300217	0.113	0.021	3.18416e-193	rods	chr10-16744670-16745972	RSU1	71412	distal
9.35499e-199	0.321703	0.091	0.01	3.5585e-193	rods	chr4-62161181-62162003			intergenic
9.83242e-199	0.296007	0.103	0.019	3.74011e-193	rods	chr1-44682940-44683973	C1orf228	8219	distal
1.21477e-198	0.299927	0.091	0.012	4.62082e-193	rods	chr4-89152849-89153504	TIGD2	40033	distal
1.45798e-198	0.280239	0.208	0.07	5.54595e-193	rods	chr2-144003476-144007057	GTDC1	170161	distal
1.4699e-198	0.300501	0.103	0.017	5.59128e-193	rods	chr17-32195714-32196878	RHOT1	53035	distal
2.07762e-198	0.309123	0.116	0.023	7.90295e-193	rods	chr19-4957661-4958928	KDM4B	-10185	distal
3.5847e-198	0.32162	0.162	0.041	1.36357e-192	rods	chr5-137615248-137617849	KLHL3	88588	distal
3.8476e-198	0.28828	0.082	0.01	1.46357e-192	rods	chr1-186456621-186457516	PDC	3607	distal
3.87626e-198	0.306328	0.108	0.018	1.47447e-192	rods	chr15-90662855-90663995	BLM	-53332	distal
4.46011e-198	0.309721	0.131	0.028	1.69656e-192	rods	chr12-128642473-128643724	SLC15A4	180260	distal
4.52376e-198	0.320094	0.167	0.043	1.72077e-192	rods	chr9-28031339-28033489			intergenic
4.67461e-198	0.301218	0.215	0.07	1.77815e-192	rods	chr11-112821799-112823647	NCAM1	-137600	distal
4.87001e-198	0.347263	0.148	0.032	1.85248e-192	rods	chr20-34979677-34981740	MYH7B	2048	distal
5.14027e-198	0.329526	0.189	0.053	1.95528e-192	rods	chr17-10116322-10120429	GAS7	-1769	distal
5.22703e-198	0.292179	0.36	0.155	1.98828e-192	rods	chr1-160361615-160364694	NHLH1	-2373	distal
5.95917e-198	0.291556	0.106	0.019	2.26678e-192	rods	chr3-13949095-13950774	WNT7A	-68974	distal
6.30609e-198	0.265134	0.24	0.095	2.39874e-192	rods	chr7-45218757-45222589	RAMP3	60929	distal
6.95863e-198	0.315775	0.152	0.038	2.64696e-192	rods	chr5-168419279-168422783	RARS	-63662	distal
7.85524e-198	0.323874	0.111	0.018	2.98801e-192	rods	chr8-73766858-73767962	STAU2	-19150	distal
8.13949e-198	0.267705	0.318	0.147	3.09614e-192	rods	chr19-30625920-30631834			intergenic
8.25162e-198	0.297937	0.172	0.051	3.13879e-192	rods	chr6-161574589-161576739	PARK2	-5169	distal
9.84001e-198	0.313599	0.15	0.036	3.74299e-192	rods	chr3-52346754-52349004	DNAH1	30436	distal
1.97174e-197	0.305672	0.133	0.03	7.50021e-192	rods	chr18-74860821-74861733			intergenic
2.13134e-197	0.290749	0.08	0.009	8.1073e-192	rods	chr20-31687572-31689565	BCL2L1	33033	distal
2.27181e-197	0.32322	0.121	0.023	8.64162e-192	rods	chr10-28636784-28637979	BAMBI	-39363	distal
3.28685e-197	0.305213	0.26	0.096	1.25027e-191	rods	chr1-46456501-46460354	DMBX1	-46642	distal
3.41195e-197	0.251415	0.433	0.236	1.29785e-191	rods	chr14-96390702-96393506	AK7	0	promoter
3.5323e-197	0.254413	0.387	0.199	1.34363e-191	rods	chr11-57498907-57502624	SLC43A1	12262	distal
5.42176e-197	0.309586	0.189	0.057	2.06236e-191	rods	chr12-50032376-50033792	RACGAP1	-6882	distal
1.43352e-196	0.302025	0.108	0.019	5.45291e-191	rods	chr3-185695675-185696572	SENP2	109502	distal
1.57536e-196	0.283415	0.079	0.01	5.99242e-191	rods	chr15-88674512-88675153	ISG20	35572	distal
1.63766e-196	0.322127	0.123	0.023	6.22943e-191	rods	chr4-84101927-84102878			intergenic
2.37687e-196	0.294507	0.096	0.015	9.04127e-191	rods	chr3-23198788-23200289	UBE2E2	-2731	distal
2.55528e-196	0.289389	0.22	0.08	9.7199e-191	rods	chr2-96787806-96789644	CNNM3	-26601	distal
3.10792e-196	0.315439	0.128	0.026	1.18221e-190	rods	chr6-6229756-6231025	F13A1	89810	distal
3.99872e-196	0.285402	0.083	0.011	1.52105e-190	rods	chr1-19126690-19127751	UBR4	-7841	distal
4.43256e-196	0.31955	0.188	0.057	1.68608e-190	rods	chr17-79719867-79722871	ENPP7	-8048	distal
5.88798e-196	0.292225	0.113	0.022	2.2397e-190	rods	chr5-10614587-10620821	ANKRD33B	50120	distal
1.14212e-195	0.304854	0.248	0.088	4.34444e-190	rods	chr12-122886081-122890012	VPS37B	6433	distal
1.48773e-195	0.318118	0.115	0.02	5.65909e-190	rods	chr4-183920194-183921298	STOX2	14839	distal
1.75128e-195	0.317843	0.136	0.03	6.66161e-190	rods	chr12-5379640-5382672	NTF3	-49441	distal
2.48134e-195	0.292087	0.18	0.054	9.43866e-190	rods	chr4-16074754-16081191	PROM1	0	promoter
2.60862e-195	0.291408	0.096	0.015	9.92279e-190	rods	chr22-37865417-37866359	EIF3L	15937	distal
2.70536e-195	0.322658	0.175	0.048	1.02908e-189	rods	chr19-3783363-3786860	MATK	0	promoter
3.88808e-195	0.271129	0.304	0.133	1.47897e-189	rods	chr16-55328374-55334707	IRX6	4615	distal
4.92122e-195	0.282248	0.069	0.006	1.87196e-189	rods	chr15-90729326-90729978	BLM	11933	distal
5.07379e-195	0.317995	0.145	0.034	1.92999e-189	rods	chr16-9383096-9385126			intergenic
5.48967e-195	0.31901	0.12	0.022	2.08819e-189	rods	chr10-127318106-127320549	FAM196A	-121948	distal
8.74335e-195	0.293569	0.14	0.036	3.32584e-189	rods	chr16-4787382-4789287	SEPT12;SMIM22	0	promoter
9.00327e-195	0.293534	0.095	0.014	3.42471e-189	rods	chr11-100761455-100762519	ARHGAP42	73780	distal
9.04114e-195	0.324907	0.141	0.031	3.43912e-189	rods	chr7-2042946-2044377	MAD1L1	186042	distal
1.11786e-194	0.301557	0.184	0.057	4.25215e-189	rods	chr1-3629799-3632508	TPRG1L	4750	distal
1.2322e-194	0.308128	0.1	0.016	4.68711e-189	rods	chr16-30565319-30566377	ZNF688	5259	distal
1.42568e-194	0.26623	0.328	0.153	5.42308e-189	rods	chr5-80958298-80962256	RASGRF2	0	promoter
2.36503e-194	0.366725	0.166	0.036	8.99621e-189	rods	chr11-61192595-61196495	PGA3	-6885	distal
3.856e-194	0.309305	0.112	0.02	1.46676e-188	rods	chr7-131133828-131135173	MKLN1	23733	distal
4.19861e-194	0.251822	0.344	0.17	1.59709e-188	rods	chr11-8225191-8235210	LMO1	28649	distal
5.18139e-194	0.299013	0.08	0.009	1.97092e-188	rods	chr11-74735136-74735978	CHRDL2	-3751	distal
6.01346e-194	0.288773	0.128	0.03	2.28743e-188	rods	chr2-59529413-59530750			intergenic
6.69905e-194	0.300178	0.248	0.089	2.54822e-188	rods	chr2-29041981-29043502	C2orf71	30760	distal
9.97605e-194	0.304511	0.091	0.012	3.79474e-188	rods	chr3-94653916-94654846			intergenic
1.73137e-193	0.321639	0.145	0.033	6.58588e-188	rods	chr10-126742774-126743869	DOCK1	-161540	distal
2.03844e-193	0.281693	0.08	0.01	7.75394e-188	rods	chr8-9695357-9696202	TNKS	120351	distal
2.30072e-193	0.305604	0.111	0.021	8.75159e-188	rods	chr3-114089276-114091028	QTRT2	32495	distal
3.50011e-193	0.288599	0.077	0.008	1.33139e-187	rods	chr3-105816802-105817712	CBLB	50670	distal
3.90672e-193	0.29221	0.098	0.016	1.48606e-187	rods	chrX-153853109-153854246	L1CAM	21602	distal
7.19837e-193	0.303654	0.147	0.036	2.73815e-187	rods	chr14-59827320-59830706	RTN1	40047	distal
7.92844e-193	0.29779	0.196	0.063	3.01586e-187	rods	chr3-72303587-72304768	RYBP	141854	distal
8.16906e-193	0.267252	0.3	0.128	3.10739e-187	rods	chr15-34798916-34800721	ACTC1	-2777	distal
8.84806e-193	0.298151	0.325	0.134	3.36567e-187	rods	chr17-17384540-17387016	NT5M	81206	distal
1.02648e-192	0.294778	0.08	0.008	3.90458e-187	rods	chr13-70747106-70747781			intergenic
1.43718e-192	0.32608	0.205	0.061	5.46682e-187	rods	chr4-77176495-77179879	CCNG2	18070	distal
1.51749e-192	0.294418	0.117	0.023	5.7723e-187	rods	chr7-69283328-69285486			intergenic
1.76728e-192	0.258715	0.306	0.139	6.72247e-187	rods	chr13-50227587-50230399			intergenic
2.62197e-192	0.289522	0.134	0.036	9.97359e-187	rods	chr2-10190980-10193758	AC104794.5	68242	distal
3.49591e-192	0.290393	0.299	0.128	1.32979e-186	rods	chr16-798825-805186	GNG13	0	promoter
3.96878e-192	0.307291	0.103	0.017	1.50966e-186	rods	chrX-43660576-43661827	MAOA	4358	distal
3.98879e-192	0.30241	0.085	0.01	1.51727e-186	rods	chr2-136492003-136493202			intergenic
6.16082e-192	0.324309	0.163	0.04	2.34348e-186	rods	chr14-103453677-103456742	CKB	66370	distal
7.3115e-192	0.312225	0.143	0.035	2.78119e-186	rods	chr22-39356149-39358157	SYNGR1	-6013	distal
8.49746e-192	0.30299	0.117	0.023	3.23231e-186	rods	chr17-2610320-2612122	PAFAH1B1	16575	distal
1.45392e-191	0.310145	0.15	0.038	5.53049e-186	rods	chr12-111443460-111447294	SH2B3	8599	distal
1.47223e-191	0.295751	0.134	0.03	5.60013e-186	rods	chr6-42335933-42338184	TRERF1	113078	distal
1.59744e-191	0.291126	0.182	0.058	6.0764e-186	rods	chr7-801184-802932	SUN1	-13683	distal
1.71258e-191	0.290696	0.11	0.022	6.51438e-186	rods	chr21-46509671-46510551	DIP2A	50561	distal
1.93629e-191	0.29917	0.108	0.02	7.36535e-186	rods	chr1-234221403-234222423	SLC35F3	7133	distal
2.04179e-191	0.311272	0.147	0.035	7.76665e-186	rods	chr16-19722626-19724618	IQCK	4347	distal
2.11693e-191	0.290717	0.094	0.015	8.0525e-186	rods	chr14-95194741-95196616	CLMN	-441	promoter
2.40096e-191	0.313183	0.147	0.035	9.13289e-186	rods	chr7-109663223-109664932			intergenic
2.5675e-191	0.301035	0.147	0.037	9.76638e-186	rods	chr1-43719335-43720993	ST3GAL3	11495	distal
2.78274e-191	0.3013	0.095	0.014	1.05851e-185	rods	chr15-81068124-81070024	CFAP161	-64223	distal
3.46151e-191	0.30394	0.107	0.019	1.3167e-185	rods	chr4-18154750-18155997	LCORL	-132874	distal
5.47463e-191	0.284566	0.34	0.147	2.08247e-185	rods	chr16-50296737-50300022	ADCY7	8826	distal
5.87215e-191	0.29498	0.089	0.012	2.23368e-185	rods	chr5-45410311-45411352			intergenic
5.95276e-191	0.298321	0.192	0.061	2.26434e-185	rods	chr12-113663478-113666895	LHX5	-191406	distal
8.85818e-191	0.31015	0.125	0.027	3.36952e-185	rods	chr8-23337955-23340843	R3HCC1	50027	distal
1.09098e-190	0.280637	0.073	0.008	4.14991e-185	rods	chr2-190308000-190308838	HIBCH	11053	distal
1.27691e-190	0.298375	0.085	0.01	4.85718e-185	rods	chr2-85472087-85473160	SH2D6	53157	distal
1.47944e-190	0.291534	0.104	0.018	5.62757e-185	rods	chr3-59548472-59550635			intergenic
1.98499e-190	0.320568	0.113	0.02	7.55059e-185	rods	chrX-136884462-136885331	RBMX	-3698	distal
2.42877e-190	0.301363	0.123	0.026	9.23868e-185	rods	chr1-229420337-229421633	ACTA1	12462	distal
3.07768e-190	0.303865	0.126	0.027	1.1707e-184	rods	chr2-24761703-24763520	CENPO	-29625	distal
3.15654e-190	0.300388	0.178	0.055	1.2007e-184	rods	chr7-149854355-149856324	ZNF862	15989	distal
3.3514e-190	0.298498	0.084	0.01	1.27482e-184	rods	chr5-152974356-152975217			intergenic
4.17995e-190	0.30973	0.219	0.073	1.58999e-184	rods	chr11-123504192-123507193	GRAMD1B	12540	distal
4.64695e-190	0.304112	0.164	0.045	1.76763e-184	rods	chr1-164801050-164802790	PBX1	8559	distal
7.1011e-190	0.296696	0.089	0.012	2.70115e-184	rods	chr20-2273426-2274453	TGM3	-21548	distal
7.78946e-190	0.294764	0.183	0.057	2.96299e-184	rods	chr15-86061302-86064556	AGBL1	-15417	distal
1.2999e-189	0.32344	0.164	0.041	4.94463e-184	rods	chr6-14860843-14862072			intergenic
1.33221e-189	0.310298	0.123	0.025	5.06751e-184	rods	chr13-49580712-49581865	RCBTB1	3719	distal
1.52817e-189	0.285884	0.082	0.011	5.81292e-184	rods	chr2-62162878-62163875	B3GNT2	-32238	distal
1.5874e-189	0.286667	0.089	0.014	6.03825e-184	rods	chr19-18998134-19000690	SUGP2	32810	distal
1.61254e-189	0.29525	0.155	0.043	6.13386e-184	rods	chr8-85986722-85988871	PSKH2	80827	distal
1.68223e-189	0.323432	0.275	0.099	6.39896e-184	rods	chr10-103616449-103624019	NEURL1	122471	distal
1.69891e-189	0.286259	0.077	0.009	6.4624e-184	rods	chr7-29315098-29315932	CPVL	-119822	distal
1.87116e-189	0.297737	0.097	0.016	7.1176e-184	rods	chr19-15335667-15336515	BRD4	-3122	distal
2.7806e-189	0.287091	0.082	0.01	1.0577e-183	rods	chr20-46957018-46958164	EYA2	-31837	distal
3.83935e-189	0.259641	0.286	0.13	1.46043e-183	rods	chr1-6422910-6428452	ESPN;HES2	0	promoter
4.33175e-189	0.286199	0.139	0.036	1.64773e-183	rods	chr22-33756349-33758424	LARGE	161991	distal
5.55254e-189	0.294048	0.101	0.018	2.1121e-183	rods	chr1-36236085-36236869	THRAP3	11654	distal
7.81163e-189	0.301904	0.087	0.011	2.97143e-183	rods	chr6-101508840-101509721	GRIK2	110048	distal
8.88826e-189	0.309054	0.164	0.044	3.38096e-183	rods	chr20-36739678-36742171	NDRG3	3883	distal
1.09007e-188	0.286542	0.235	0.086	4.14647e-183	rods	chr17-36919892-36922026	LHX1	-15449	distal
2.12976e-188	0.291312	0.193	0.063	8.1013e-183	rods	chr14-74938860-74943041	PGF	12202	distal
2.34139e-188	0.305143	0.159	0.043	8.90628e-183	rods	chr1-205424062-205425907	LEMD1	-2008	distal
2.79921e-188	0.297533	0.11	0.02	1.06478e-182	rods	chr12-1357169-1359058			intergenic
3.1281e-188	0.286134	0.083	0.011	1.18988e-182	rods	chr6-22156659-22157903	PRL	139599	distal
3.57088e-188	0.258536	0.24	0.097	1.35831e-182	rods	chr2-69740622-69745216	ANXA4	0	promoter
5.22199e-188	0.304032	0.113	0.021	1.98636e-182	rods	chr6-41817856-41819157	TOMM6	30192	distal
1.22147e-187	0.28792	0.351	0.149	4.6463e-182	rods	chr1-180192282-180199518	LHX4	-30768	distal
1.52918e-187	0.293635	0.092	0.014	5.81677e-182	rods	chr15-98748836-98750516	IGF1R	99793	distal
1.96457e-187	0.300821	0.157	0.042	7.47293e-182	rods	chr19-18044568-18046632	ARRDC2	36401	distal
2.21615e-187	0.294813	0.118	0.025	8.42989e-182	rods	chr11-44258932-44260716	ALX4	49451	distal
2.53177e-187	0.281352	0.276	0.112	9.63046e-182	rods	chr9-127660025-127663017	CFAP157	-43975	distal
2.68488e-187	0.302166	0.104	0.017	1.02129e-181	rods	chr7-21268948-21269943	SP4	-158091	distal
3.56556e-187	0.292405	0.121	0.026	1.35629e-181	rods	chr12-50120039-50121308	COX14	7803	distal
3.83019e-187	0.301683	0.113	0.022	1.45695e-181	rods	chr7-69650033-69652534	AUTS2	50423	distal
6.07585e-187	0.29608	0.104	0.018	2.31116e-181	rods	chr18-46077214-46078314	PSTPIP2	-4954	distal
7.66746e-187	0.3132	0.112	0.02	2.91659e-181	rods	chr20-8027297-8028083	TMX4	-7468	distal
7.85188e-187	0.304299	0.09	0.012	2.98674e-181	rods	chr21-33498056-33499228	DNAJC28	-6336	distal
8.51991e-187	0.296636	0.117	0.024	3.24085e-181	rods	chr14-67759169-67761340	ZFYVE26	152	distal
9.53963e-187	0.296785	0.1	0.016	3.62873e-181	rods	chr18-58948202-58949843	ZNF532	83579	distal
9.84017e-187	0.324091	0.164	0.043	3.74305e-181	rods	chr17-44023454-44025817	TMEM101	-303	promoter
2.03727e-186	0.267135	0.072	0.009	7.74947e-181	rods	chr6-31744047-31745172	MSH5	4027	distal
3.7343e-186	0.284395	0.119	0.026	1.42047e-180	rods	chr17-47676594-47678838	TBKBP1	-16426	distal
4.31747e-186	0.283944	0.102	0.019	1.6423e-180	rods	chr1-202951057-202953225	ADIPOR1	5040	distal
4.3706e-186	0.277174	0.13	0.033	1.66251e-180	rods	chr11-115548460-115549767	CADM1	-43895	distal
5.32295e-186	0.287935	0.128	0.03	2.02477e-180	rods	chr6-3306029-3307906	PSMG4	47046	distal
5.63652e-186	0.313253	0.128	0.026	2.14405e-180	rods	chr1-29351342-29353717	PTPRU	114704	distal
5.97263e-186	0.253557	0.33	0.16	2.2719e-180	rods	chr12-132187739-132192439	GALNT9	13354	distal
6.85552e-186	0.28587	0.128	0.03	2.60774e-180	rods	chr9-8234033-8235145			intergenic
1.19307e-185	0.273209	0.077	0.01	4.53827e-180	rods	chr5-133489518-133490142	FSTL4	113853	distal
1.26688e-185	0.306568	0.094	0.014	4.81904e-180	rods	chr17-44022126-44022932	TMEM101	220	distal
1.31859e-185	0.252593	0.32	0.152	5.01571e-180	rods	chr12-1913505-1919767	CACNA2D4	0	promoter
1.52489e-185	0.308615	0.121	0.024	5.80044e-180	rods	chr3-52474421-52475958	NISCH	18805	distal
1.70025e-185	0.304613	0.122	0.027	6.4675e-180	rods	chr17-17647348-17649557	RAI1	-31916	distal
1.95645e-185	0.276927	0.344	0.158	7.44206e-180	rods	chr17-66834422-66838790	CACNG5	0	promoter
1.97923e-185	0.284278	0.097	0.017	7.52869e-180	rods	chr3-49914536-49916721	MST1R	-10663	distal
2.04487e-185	0.298593	0.092	0.014	7.77838e-180	rods	chr1-37545980-37546824	SNIP1	7521	distal
2.8068e-185	0.290954	0.129	0.03	1.06766e-179	rods	chr11-68753189-68754401	MTL5	-1625	distal
3.03881e-185	0.318603	0.146	0.035	1.15592e-179	rods	chr19-4710200-4711864	DPP9	2443	distal
3.04058e-185	0.298431	0.107	0.02	1.15659e-179	rods	chr1-157622231-157623244	FCRL4	-24151	distal
3.93551e-185	0.317128	0.177	0.051	1.49701e-179	rods	chr2-16284677-16286586			intergenic
4.96363e-185	0.257919	0.275	0.118	1.88809e-179	rods	chr22-23101633-23105543	GNAZ	31273	distal
6.89677e-185	0.262109	0.062	0.005	2.62343e-179	rods	chr19-56563180-56563767	ZNF470	-3744	distal
8.37594e-185	0.286414	0.138	0.036	3.18608e-179	rods	chr9-135900985-135903358	CAMSAP1	3867	distal
8.64827e-185	0.304143	0.201	0.065	3.28967e-179	rods	chr17-74086737-74090328	RPL38	-113254	distal
1.35536e-184	0.283747	0.228	0.083	5.15559e-179	rods	chr1-5310559-5315133			intergenic
1.5351e-184	0.287352	0.134	0.034	5.83927e-179	rods	chr10-22598138-22601653	PIP4K2A	-6425	distal
1.96602e-184	0.291797	0.112	0.023	7.47845e-179	rods	chr13-39119099-39120240	NHLRC3	80709	distal
2.03354e-184	0.304991	0.158	0.043	7.73527e-179	rods	chr17-8562884-8564564	MYH10	66198	distal
2.52843e-184	0.29634	0.149	0.039	9.61776e-179	rods	chr17-49200244-49201942	GNGT2	6971	distal
2.75181e-184	0.28017	0.114	0.026	1.04675e-178	rods	chr14-101754746-101756757	PPP2R5C	-5041	distal
3.21766e-184	0.254322	0.291	0.132	1.22395e-178	rods	chr15-67967524-67969556	PIAS1	-84623	distal
4.09335e-184	0.283241	0.269	0.111	1.55705e-178	rods	chr9-97411415-97415522	TDRD7	0	promoter
4.71438e-184	0.299942	0.102	0.017	1.79328e-178	rods	chr18-13707686-13708772	FAM210A	17789	distal
5.03079e-184	0.309439	0.112	0.02	1.91364e-178	rods	chr4-3847040-3847990	ADRA2C	80643	distal
5.03258e-184	0.277347	0.072	0.007	1.91432e-178	rods	chr9-119466007-119466755	BRINP1	-96540	distal
6.44128e-184	0.29715	0.098	0.015	2.45017e-178	rods	chr19-51513849-51515336	SIGLEC12	-12060	distal
1.49432e-183	0.287275	0.09	0.014	5.68416e-178	rods	chr22-41492789-41494660	ACO2	23660	distal
3.57204e-183	0.286801	0.082	0.011	1.35875e-177	rods	chr17-27959238-27959943	LYRM9	-65855	distal
3.57444e-183	0.286755	0.104	0.019	1.35966e-177	rods	chr12-91538538-91539547			intergenic
4.1894e-183	0.298787	0.243	0.091	1.59358e-177	rods	chr20-62484877-62488359	GATA5	-8907	distal
4.34463e-183	0.301006	0.114	0.022	1.65263e-177	rods	chr6-170321446-170322740	FAM120B	14689	distal
4.59954e-183	0.318634	0.213	0.067	1.7496e-177	rods	chr12-119336531-119341638	CCDC60	1603	distal
4.61031e-183	0.309548	0.155	0.039	1.75369e-177	rods	chr10-86256567-86259333	GRID1	107146	distal
6.42008e-183	0.303598	0.183	0.053	2.4421e-177	rods	chr5-136525351-136526452	TRPC7	-159806	distal
7.95225e-183	0.29337	0.13	0.033	3.02492e-177	rods	chr11-66491275-66492966	DPP3	10838	distal
8.3117e-183	0.306409	0.199	0.063	3.16165e-177	rods	chr1-18343598-18345529	KLHDC7A	-135453	distal
8.35193e-183	0.30471	0.139	0.033	3.17695e-177	rods	chr17-8018506-8021505	GUCY2D	15913	distal
1.06787e-182	0.29054	0.09	0.013	4.062e-177	rods	chr3-45188663-45189673	TMEM158	36606	distal
1.34391e-182	0.29924	0.192	0.06	5.11202e-177	rods	chr1-66575602-66577714	SGIP1	41321	distal
1.79213e-182	0.299801	0.101	0.017	6.81698e-177	rods	chr15-71219496-71220838	CT62	-104002	distal
1.87404e-182	0.30577	0.235	0.086	7.12855e-177	rods	chr6-158754603-158759535	EZR	29940	distal
2.18807e-182	0.28717	0.091	0.013	8.3231e-177	rods	chr8-68750758-68752294	C8orf34	125300	distal
2.47727e-182	0.289646	0.202	0.069	9.42318e-177	rods	chr11-12219960-12224989	MICAL2	57805	distal
2.49405e-182	0.2537	0.268	0.117	9.48699e-177	rods	chr7-1732241-1745253	ELFN1	23080	distal
3.09599e-182	0.285356	0.102	0.018	1.17767e-176	rods	chr10-16751786-16752924	RSU1	64460	distal
3.83348e-182	0.287744	0.163	0.049	1.4582e-176	rods	chr12-113697295-113698833			intergenic
7.41599e-182	0.291344	0.18	0.057	2.82093e-176	rods	chr11-34235243-34237360	ABTB2	120649	distal
8.30885e-182	0.275586	0.086	0.013	3.16056e-176	rods	chr17-17854794-17856652	TOM1L2	15413	distal
8.77382e-182	0.299186	0.111	0.022	3.33743e-176	rods	chr19-2777572-2779532	SGTA	3840	distal
1.03885e-181	0.29603	0.169	0.05	3.95161e-176	rods	chr2-85724461-85725471	ATOH8	-28423	distal
1.1204e-181	0.291714	0.128	0.03	4.26183e-176	rods	chr4-169975358-169976790	MFAP3L	26995	distal
1.17951e-181	0.275546	0.094	0.016	4.48667e-176	rods	chr9-123045834-123047137	GPR21	11308	distal
1.34644e-181	0.283588	0.097	0.017	5.12165e-176	rods	chr12-32309649-32310638	FGD4	-88891	distal
1.3723e-181	0.303898	0.13	0.029	5.22004e-176	rods	chr20-42856967-42858609	PTPRT	-65500	distal
2.29172e-181	0.270901	0.073	0.008	8.71736e-176	rods	chr2-215338592-215339666	ATIC	26502	distal
2.3881e-181	0.297945	0.255	0.094	9.08397e-176	rods	chr5-180113999-180117573	RASGEF1C	19204	distal
2.63563e-181	0.288997	0.138	0.036	1.00255e-175	rods	chr14-77006719-77009191	IRF2BPL	19509	distal
2.69292e-181	0.276556	0.14	0.039	1.02435e-175	rods	chr7-2045001-2047964	MAD1L1	182455	distal
3.20498e-181	0.31789	0.194	0.059	1.21913e-175	rods	chr1-154185838-154187014	TPM3	-2589	distal
3.76285e-181	0.29998	0.094	0.014	1.43133e-175	rods	chr11-85364054-85364767			intergenic
3.91598e-181	0.301972	0.123	0.026	1.48958e-175	rods	chr1-15633450-15635027	DDI2	15951	distal
4.05495e-181	0.28185	0.068	0.006	1.54244e-175	rods	chr7-91780455-91781092	MTERF1	99601	distal
4.13533e-181	0.306199	0.125	0.025	1.57302e-175	rods	chr3-63532133-63533310	SYNPR	88797	distal
4.25519e-181	0.275124	0.139	0.039	1.61861e-175	rods	chr12-130687931-130690515	RIMBP2	25767	distal
7.51868e-181	0.286202	0.109	0.022	2.85999e-175	rods	chrX-38656069-38657832	TSPAN7	94526	distal
7.54631e-181	0.298041	0.151	0.041	2.8705e-175	rods	chr3-127851647-127852557	MGLL	-28397	distal
7.64605e-181	0.280823	0.207	0.074	2.90844e-175	rods	chr1-42745406-42748126	CLDN19	-5152	distal
8.27794e-181	0.276126	0.092	0.016	3.14881e-175	rods	chr12-54341014-54342105	COPZ1	15431	distal
1.19427e-180	0.300659	0.136	0.032	4.54283e-175	rods	chr14-93462039-93463286	UNC79	-14355	distal
1.47263e-180	0.3095	0.223	0.074	5.60165e-175	rods	chr6-37451115-37453610	CMTR1	17896	distal
1.644e-180	0.258385	0.062	0.006	6.25354e-175	rods	chr5-147540754-147541537	DPYSL3	-30698	distal
1.75306e-180	0.301841	0.101	0.017	6.66836e-175	rods	chr3-145189482-145190519			intergenic
2.38893e-180	0.288902	0.097	0.016	9.08714e-175	rods	chr6-35531833-35532898	TULP1	-18895	distal
2.39895e-180	0.305796	0.149	0.038	9.12526e-175	rods	chr18-23056417-23059118	RBBP8	39622	distal
3.1636e-180	0.293753	0.107	0.02	1.20338e-174	rods	chr20-48089314-48090306			intergenic
4.08137e-180	0.28521	0.075	0.008	1.55249e-174	rods	chr1-162666106-162666827	DDR2	33637	distal
5.67273e-180	0.261513	0.352	0.171	2.15782e-174	rods	chr3-127695895-127700957	ABTB1	21786	distal
8.93059e-180	0.288773	0.091	0.014	3.39706e-174	rods	chr6-52955778-52956462	GSTA4	37942	distal
9.80036e-180	0.27644	0.134	0.037	3.72791e-174	rods	chr1-52911395-52915100	ECHDC2	6627	distal
9.90351e-180	0.274116	0.08	0.011	3.76715e-174	rods	chr13-75461661-75463464	TBC1D4	18651	distal
1.48825e-179	0.298064	0.189	0.059	5.66108e-174	rods	chr18-47925227-47927727	SMAD2	2833	distal
1.54994e-179	0.295679	0.108	0.021	5.89574e-174	rods	chr22-35770876-35771711	RBFOX2	38294	distal
1.57736e-179	0.284645	0.102	0.019	6.00003e-174	rods	chr12-32394860-32395545	FGD4	-3984	distal
1.62848e-179	0.309242	0.129	0.028	6.19451e-174	rods	chr3-175095463-175096599			intergenic
1.6945e-179	0.279818	0.208	0.075	6.44564e-174	rods	chr22-19841752-19847279	C22orf29	7562	distal
1.72457e-179	0.309445	0.162	0.043	6.55999e-174	rods	chr1-48024609-48025774	TRABD2B	-27714	distal
1.95392e-179	0.272495	0.079	0.012	7.43241e-174	rods	chr5-1820198-1820972	NDUFS6	18784	distal
2.09239e-179	0.305286	0.105	0.018	7.95913e-174	rods	chr6-23824202-23824921			intergenic
2.89136e-179	0.276752	0.103	0.021	1.09983e-173	rods	chr13-51997641-51999965	ATP7B	11375	distal
2.93081e-179	0.279769	0.147	0.041	1.11484e-173	rods	chr11-96277795-96279995	MAML2	63186	distal
3.25198e-179	0.286747	0.111	0.024	1.237e-173	rods	chr2-241372140-241374183	FARP2	15844	distal
4.58208e-179	0.283788	0.102	0.019	1.74296e-173	rods	chr10-79225955-79227831	ZMIZ1	24361	distal
5.16273e-179	0.264407	0.28	0.119	1.96383e-173	rods	chr7-248931-254731	WI2-2373I1.1	-35439	distal
1.24194e-178	0.283678	0.145	0.04	4.72415e-173	rods	chr17-64961493-64963079	LRRC37A3	-42025	distal
1.32637e-178	0.269922	0.261	0.109	5.04532e-173	rods	chr16-74734087-74740343	MLKL	-33173	distal
1.54537e-178	0.281127	0.079	0.011	5.87837e-173	rods	chr6-42689777-42690680	PRPH2	31895	distal
1.76161e-178	0.308683	0.197	0.062	6.70091e-173	rods	chr22-23035892-23039238	GNAZ	-31123	distal
1.93894e-178	0.285869	0.101	0.019	7.37543e-173	rods	chr5-135264722-135266415	H2AFY	132797	distal
2.51196e-178	0.303042	0.144	0.036	9.55514e-173	rods	chr3-154136765-154137747	ARHGEF26	15326	distal
3.24669e-178	0.306872	0.142	0.035	1.23499e-172	rods	chr22-44796861-44800688	ARHGAP8	44256	distal
4.38485e-178	0.315759	0.145	0.035	1.66793e-172	rods	chr10-2797858-2799057			intergenic
5.71025e-178	0.290227	0.083	0.011	2.17209e-172	rods	chr12-57910410-57911347	ATP23	-30230	distal
6.182e-178	0.269786	0.237	0.096	2.35154e-172	rods	chr2-235657380-235662490	AGAP1	-7114	distal
7.93711e-178	0.292643	0.086	0.012	3.01916e-172	rods	chr2-111395143-111395808			intergenic
8.21429e-178	0.289082	0.089	0.013	3.12459e-172	rods	chr5-79200603-79202059	JMY	-34130	distal
8.78075e-178	0.28687	0.123	0.028	3.34007e-172	rods	chr8-127298212-127301041	POU5F1B	-21142	distal
8.95629e-178	0.274996	0.244	0.099	3.40684e-172	rods	chr11-8288739-8292708	LMO1	-20023	distal
9.87018e-178	0.28249	0.11	0.024	3.75447e-172	rods	chr3-148963237-148964284	GYG1	-27057	distal
9.95884e-178	0.27574	0.095	0.018	3.78819e-172	rods	chr16-17940878-17942566			intergenic
1.01569e-177	0.27906	0.092	0.016	3.86353e-172	rods	chr1-158052689-158054278	KIRREL	-32402	distal
1.03183e-177	0.281189	0.112	0.025	3.92494e-172	rods	chr14-60245220-60246090	PPM1A	0	promoter
1.35223e-177	0.297987	0.131	0.03	5.14369e-172	rods	chr12-51776466-51778108	RP11-923I11.8	36819	distal
1.4823e-177	0.280193	0.087	0.014	5.63843e-172	rods	chr1-17106667-17107616	PADI2	11820	distal
1.82287e-177	0.250543	0.357	0.182	6.93393e-172	rods	chr9-37649494-37656271	FRMPD1	0	promoter
2.0142e-177	0.293896	0.123	0.027	7.66172e-172	rods	chr8-80078691-80081631	RP11-26J3.4;TPD52	0	promoter
2.04915e-177	0.297408	0.151	0.04	7.79465e-172	rods	chr1-171016390-171018137	FMO3	-72740	distal
2.18048e-177	0.281026	0.155	0.044	8.29423e-172	rods	chr1-54244568-54247795	MRPL37	44373	distal
2.34943e-177	0.276149	0.081	0.011	8.93686e-172	rods	chr3-44782545-44783572	KIF15	-15615	distal
2.43636e-177	0.307631	0.204	0.064	9.26756e-172	rods	chr7-116762049-116764902	MET	62965	distal
3.02797e-177	0.295684	0.105	0.02	1.15179e-171	rods	chr10-13049955-13052102	OPTN	-47347	distal
3.95784e-177	0.299954	0.122	0.026	1.5055e-171	rods	chr12-106884458-106886147	TMEM263	-69572	distal
4.29445e-177	0.277672	0.084	0.013	1.63354e-171	rods	chr1-205163312-205164234	DSTYK	9160	distal
7.89176e-177	0.29807	0.141	0.036	3.00191e-171	rods	chr9-105401463-105402492	FSD1L	-45304	distal
9.06719e-177	0.289408	0.11	0.022	3.44902e-171	rods	chr6-117329594-117330611	VGLL2	64021	distal
1.00497e-176	0.268632	0.164	0.051	3.82277e-171	rods	chr13-100525217-100527218	GGACT	6585	distal
1.16215e-176	0.257545	0.329	0.158	4.42063e-171	rods	chr2-219251593-219255299	TUBA4A;TUBA4B	0	promoter
1.33101e-176	0.279031	0.256	0.106	5.06298e-171	rods	chr1-177181170-177183508	BRINP2	9674	distal
1.35528e-176	0.276376	0.081	0.012	5.15527e-171	rods	chr10-11567586-11568483	USP6NL	5255	distal
1.47264e-176	0.285459	0.085	0.012	5.6017e-171	rods	chr20-13817529-13818401	NDUFAF5	32480	distal
2.12537e-176	0.287678	0.107	0.022	8.08458e-171	rods	chr4-74751137-74752608	BTC	42079	distal
2.50141e-176	0.256026	0.295	0.132	9.515e-171	rods	chr7-68510386-68512054			intergenic
2.58486e-176	0.288279	0.099	0.018	9.83244e-171	rods	chr7-28005409-28006524	JAZF1	174220	distal
2.83122e-176	0.281159	0.1	0.019	1.07695e-170	rods	chr5-126887788-126888768	2003-03-01	29461	distal
2.96655e-176	0.295234	0.087	0.012	1.12843e-170	rods	chr9-35469928-35470706	RUSC2	-67926	distal
3.77236e-176	0.300852	0.12	0.025	1.43495e-170	rods	chr5-5915778-5916846			intergenic
4.26047e-176	0.272471	0.199	0.072	1.62062e-170	rods	chr16-86300040-86302032			intergenic
4.3403e-176	0.294014	0.089	0.012	1.65099e-170	rods	chr10-24324481-24325962	KIAA1217	115318	distal
4.36134e-176	0.264287	0.114	0.028	1.65899e-170	rods	chr7-133827644-133828727			intergenic
5.51957e-176	0.301248	0.096	0.015	2.09956e-170	rods	chr3-52010080-52010943	RPL29	-14138	distal
5.80774e-176	0.27942	0.162	0.05	2.20918e-170	rods	chr14-61601481-61603292	RP11-47I22.4	72354	distal
1.12922e-175	0.287026	0.116	0.025	4.29537e-170	rods	chr11-128664036-128664926	FLI1	-21609	distal
1.39946e-175	0.266732	0.068	0.007	5.32335e-170	rods	chr3-169911205-169911938	SAMD7	0	promoter
1.66074e-175	0.271647	0.099	0.019	6.31722e-170	rods	chr4-113064083-113064782	ANK2	14355	distal
2.38188e-175	0.278133	0.098	0.018	9.06031e-170	rods	chr12-469756-470798	B4GALNT3	9393	distal
2.63978e-175	0.320436	0.119	0.025	1.00413e-169	rods	chr7-1617521-1618558	PSMG3	-46516	distal
2.82438e-175	0.28798	0.088	0.013	1.07435e-169	rods	chr9-86980298-86981180	GAS1	-33109	distal
2.90345e-175	0.309039	0.149	0.037	1.10443e-169	rods	chr14-21274931-21277150	HNRNPC	-5437	distal
3.48746e-175	0.284974	0.14	0.038	1.32658e-169	rods	chr16-55469755-55471473	MMP2	-7498	distal
3.68108e-175	0.286004	0.073	0.007	1.40023e-169	rods	chr19-51516368-51517007	SIGLEC12	-14579	distal
3.81496e-175	0.278369	0.092	0.015	1.45115e-169	rods	chr15-54025301-54026526	UNC13C	12398	distal
3.89603e-175	0.279929	0.164	0.052	1.48199e-169	rods	chr15-30073209-30075793	GOLGA8J	-7260	distal
4.19568e-175	0.272621	0.077	0.011	1.59597e-169	rods	chr8-64032267-64032948			intergenic
4.21321e-175	0.303342	0.136	0.033	1.60264e-169	rods	chr1-22556073-22557985	EPHA8	-5579	distal
5.43549e-175	0.288953	0.104	0.02	2.06758e-169	rods	chr7-26419122-26421122	SNX10	54798	distal
6.70943e-175	0.272756	0.084	0.013	2.55217e-169	rods	chr4-16070626-16072302	PROM1	3817	distal
8.34277e-175	0.296996	0.164	0.047	3.17346e-169	rods	chr4-5852379-5854179	CRMP1	34303	distal
9.52078e-175	0.267901	0.099	0.02	3.62156e-169	rods	chr8-21998735-22000747	NPM2	-23378	distal
9.56292e-175	0.281395	0.143	0.04	3.63759e-169	rods	chr7-91892144-91894202	MTERF1	-11424	distal
1.13841e-174	0.284197	0.094	0.015	4.33034e-169	rods	chr4-95552107-95553562	UNC5C	-2901	distal
1.16232e-174	0.28631	0.215	0.077	4.42127e-169	rods	chr9-37678724-37680851	FRMPD1	10720	distal
1.20423e-174	0.288688	0.089	0.013	4.58071e-169	rods	chr20-62091036-62091835	TAF4	-25226	distal
2.11492e-174	0.299071	0.127	0.029	8.04483e-169	rods	chr19-46383715-46385248	CCDC8	28337	distal
2.47381e-174	0.286287	0.089	0.013	9.40999e-169	rods	chr1-235341950-235342986	RP11-293G6.1	13378	distal
2.74735e-174	0.264766	0.36	0.182	1.04505e-168	rods	chr22-37050567-37056246	KCTD17	0	promoter
2.9028e-174	0.299677	0.093	0.014	1.10418e-168	rods	chr5-7010759-7012151			intergenic
2.91242e-174	0.324005	0.148	0.037	1.10784e-168	rods	chr20-63420627-63425280	KCNQ2	38583	distal
3.13997e-174	0.269103	0.091	0.017	1.1944e-168	rods	chr1-22870131-22871533	LACTBL1	91646	distal
3.41473e-174	0.267716	0.07	0.008	1.29891e-168	rods	chr19-48061006-48062460	CABP5	-16953	distal
5.27517e-174	0.260556	0.069	0.008	2.0066e-168	rods	chr1-216604236-216605259	ESRRG	109995	distal
8.57115e-174	0.272448	0.109	0.024	3.26034e-168	rods	chr6-3534533-3537175	SLC22A23	-77511	distal
8.97952e-174	0.269193	0.066	0.007	3.41567e-168	rods	chr9-76855717-76856508	PRUNE2	49534	distal
9.08147e-174	0.281486	0.108	0.023	3.45446e-168	rods	chr6-73650288-73651524	SLC17A5	2632	distal
1.24023e-173	0.28893	0.182	0.059	4.71766e-168	rods	chr1-22625495-22629375	C1QA	-7131	distal
1.31121e-173	0.301994	0.115	0.024	4.98763e-168	rods	chr8-51886639-51887587	PCMTD1	11450	distal
1.56648e-173	0.295627	0.135	0.032	5.95865e-168	rods	chr10-73862057-73864612	CAMK2G	9850	distal
2.15635e-173	0.283517	0.191	0.063	8.20242e-168	rods	chr3-61607194-61609515	PTPRG	45284	distal
2.20747e-173	0.269151	0.163	0.053	8.39687e-168	rods	chr15-64684196-64689145	OAZ2	14057	distal
2.27472e-173	0.278616	0.077	0.009	8.65271e-168	rods	chr4-41156785-41157802	APBB2	56657	distal
2.48239e-173	0.28981	0.147	0.039	9.44263e-168	rods	chr7-34837233-34839052	DPY19L1	100186	distal
3.0913e-173	0.273465	0.074	0.009	1.17588e-167	rods	chr12-81442793-81443595	PPFIA2	68768	distal
3.49721e-173	0.292204	0.101	0.017	1.33029e-167	rods	chr13-70755355-70756399			intergenic
4.38432e-173	0.286863	0.108	0.021	1.66773e-167	rods	chr2-120109683-120110803	EPB41L5	90599	distal
5.22635e-173	0.289717	0.136	0.033	1.98803e-167	rods	chr16-19837083-19838584	GPRC5B	34262	distal
5.91556e-173	0.288511	0.161	0.048	2.25019e-167	rods	chr1-178558537-178561556	TEX35	45394	distal
6.38176e-173	0.293608	0.103	0.018	2.42753e-167	rods	chr16-77944334-77945527	CLEC3A	-76988	distal
6.63375e-173	0.283964	0.193	0.065	2.52338e-167	rods	chr1-5373145-5376953			intergenic
7.40565e-173	0.276982	0.09	0.015	2.817e-167	rods	chr17-48137542-48138542	SNX11	29755	distal
8.22628e-173	0.270413	0.07	0.007	3.12915e-167	rods	chr18-70209248-70210460	RTTN	-3303	distal
8.48625e-173	0.285744	0.089	0.014	3.22804e-167	rods	chr8-67074727-67075830	CSPP1	-8018	distal
1.22401e-172	0.272699	0.085	0.013	4.65596e-167	rods	chr13-71614554-71615999			intergenic
1.30841e-172	0.283414	0.097	0.017	4.97699e-167	rods	chr2-136482749-136483638			intergenic
1.55535e-172	0.30309	0.12	0.025	5.91633e-167	rods	chr18-61367402-61368567	CDH20	33130	distal
1.58435e-172	0.289617	0.135	0.033	6.02663e-167	rods	chr2-62369608-62371371	TMEM17	134971	distal
1.63904e-172	0.268074	0.072	0.008	6.23466e-167	rods	chr3-191591907-191592662	PYDC2	130745	distal
1.77064e-172	0.262276	0.073	0.01	6.73526e-167	rods	chr2-42063572-42065117	PKDCC	15553	distal
2.17652e-172	0.283337	0.095	0.016	8.27915e-167	rods	chr12-49446259-49447229	SPATS2	78713	distal
2.47026e-172	0.285565	0.15	0.044	9.39651e-167	rods	chr2-120552075-120553827			intergenic
2.47476e-172	0.297373	0.185	0.056	9.41361e-167	rods	chr4-56122273-56123970	KIAA1211	-46225	distal
2.51851e-172	0.284085	0.12	0.028	9.58003e-167	rods	chr2-60246622-60248050			intergenic
2.54767e-172	0.278364	0.229	0.088	9.69096e-167	rods	chr20-62634726-62639040	SLCO4A1	-3405	distal
2.81957e-172	0.31796	0.129	0.027	1.07252e-166	rods	chr5-36772274-36773896	NIPBL	-102863	distal
3.81014e-172	0.304645	0.176	0.049	1.44932e-166	rods	chr1-220362848-220364415	RAB3GAP2	-90394	distal
3.9346e-172	0.265288	0.183	0.066	1.49666e-166	rods	chr18-456198-458637	COLEC12	42086	distal
5.72144e-172	0.288632	0.114	0.025	2.17635e-166	rods	chr16-10279074-10281002	GRIN2A	-96320	distal
6.59299e-172	0.260466	0.07	0.008	2.50787e-166	rods	chr7-686583-687707	PRKAR1B	24866	distal
9.30855e-172	0.289077	0.122	0.027	3.54083e-166	rods	chr20-49658402-49659626	B4GALT5	54253	distal
1.09823e-171	0.275711	0.138	0.037	4.1775e-166	rods	chr17-42407202-42408579	PTRF	14939	distal
1.37665e-171	0.266275	0.234	0.092	5.23656e-166	rods	chr16-84265733-84267252	KCNG4	-25983	distal
1.41958e-171	0.287358	0.094	0.016	5.39988e-166	rods	chr2-233300984-233302320	SAG	-5501	distal
1.43016e-171	0.273997	0.29	0.126	5.4401e-166	rods	chr16-359097-365001	MRPL28	4803	distal
1.62893e-171	0.281044	0.087	0.013	6.19619e-166	rods	chr10-16458042-16458897	PTER	21059	distal
1.96203e-171	0.302225	0.141	0.036	7.46328e-166	rods	chr9-7548910-7549957			intergenic
3.55367e-171	0.309544	0.2	0.062	1.35176e-165	rods	chr10-73865139-73869712	CAMK2G	4750	distal
4.49664e-171	0.275845	0.089	0.015	1.71045e-165	rods	chr2-26939617-26940500	MAPRE3	-30112	distal
5.04484e-171	0.276948	0.091	0.015	1.91898e-165	rods	chr17-45656365-45658251	RP11-105N13.4	36022	distal
5.16512e-171	0.272369	0.106	0.022	1.96473e-165	rods	chr9-37446367-37448027	ZBTB5	17373	distal
5.8397e-171	0.286811	0.088	0.013	2.22133e-165	rods	chr3-101325329-101326206	IMPG2	-4769	distal
8.71054e-171	0.270736	0.082	0.013	3.31336e-165	rods	chr1-197295217-197296131	CRB1	26805	distal
1.11682e-170	0.287935	0.109	0.022	4.24821e-165	rods	chr7-79967951-79969677	GNAI1	-165111	distal
1.18915e-170	0.295336	0.165	0.048	4.52333e-165	rods	chr3-98893447-98895347	DCBLD2	5980	distal
1.19319e-170	0.265983	0.092	0.018	4.5387e-165	rods	chr13-25025579-25027441	PABPC3	-68427	distal
1.22912e-170	0.284187	0.138	0.037	4.67539e-165	rods	chr5-10580094-10586587	ANKRD33B	15627	distal
1.39968e-170	0.292499	0.174	0.053	5.32417e-165	rods	chr3-49217532-49219592	CCDC36	18023	distal
1.89438e-170	0.275884	0.081	0.012	7.20593e-165	rods	chr11-225662-226565	SIRT3	9788	distal
1.89554e-170	0.271805	0.076	0.01	7.21034e-165	rods	chr16-13478604-13479584			intergenic
2.07238e-170	0.285042	0.111	0.024	7.88303e-165	rods	chrX-110182338-110183402	AMMECR1	134683	distal
2.3209e-170	0.277556	0.104	0.022	8.82836e-165	rods	chr2-190547609-190548586	NEMP2	-12887	distal
2.95572e-170	0.284526	0.157	0.048	1.12431e-164	rods	chr17-73755043-73757983	SDK2	-110954	distal
3.08503e-170	0.305092	0.116	0.023	1.1735e-164	rods	chr14-21279584-21280973	RPGRIP1	-6966	distal
3.40281e-170	0.301369	0.186	0.058	1.29438e-164	rods	chr5-125869582-125870864			intergenic
3.4884e-170	0.296648	0.124	0.027	1.32694e-164	rods	chr16-57427172-57428439	CIAPIN1	12537	distal
3.58848e-170	0.307399	0.125	0.026	1.36501e-164	rods	chr7-76386436-76387657	ZP3	-9861	distal
4.12011e-170	0.295965	0.215	0.075	1.56723e-164	rods	chr11-120103958-120107123	TRIM29	18456	distal
6.29709e-170	0.286599	0.117	0.027	2.39532e-164	rods	chr1-171032731-171033792	FMO3	-57085	distal
7.34244e-170	0.301123	0.125	0.028	2.79296e-164	rods	chrX-110021091-110022621	TMEM164	17977	distal
1.15324e-169	0.300683	0.127	0.028	4.38677e-164	rods	chr8-36344198-36345523			intergenic
1.33152e-169	0.271882	0.079	0.011	5.06492e-164	rods	chr8-20652098-20652891			intergenic
1.3402e-169	0.287574	0.141	0.038	5.09792e-164	rods	chr18-59297947-59299790	CPLX4	18755	distal
1.87363e-169	0.27526	0.1	0.02	7.12701e-164	rods	chr18-58970228-58971306	ZNF532	105605	distal
2.08696e-169	0.315663	0.159	0.042	7.93847e-164	rods	chr4-102404433-102406930	SLC39A8	-58959	distal
2.50621e-169	0.306413	0.165	0.049	9.53324e-164	rods	chr4-3606533-3609304	LRPAP1	-73974	distal
3.2284e-169	0.287343	0.103	0.019	1.22804e-163	rods	chr17-45644993-45645953	RP11-105N13.4	24650	distal
4.3569e-169	0.262817	0.065	0.006	1.6573e-163	rods	chr12-15793910-15794640	EPS8	-4334	distal
4.47394e-169	0.279859	0.095	0.017	1.70182e-163	rods	chr13-98678511-98679644	SLC15A1	73011	distal
4.76166e-169	0.253638	0.063	0.007	1.81126e-163	rods	chr11-44254041-44254639	ALX4	55528	distal
4.81862e-169	0.276881	0.196	0.068	1.83293e-163	rods	chr15-88299076-88300528	NTRK3	-42329	distal
4.91475e-169	0.286214	0.165	0.052	1.8695e-163	rods	chr3-87975488-87976627	HTR1F	-14069	distal
5.67451e-169	0.269489	0.106	0.023	2.1585e-163	rods	chr11-9343661-9344700	TMEM41B	-28881	distal
6.79286e-169	0.273353	0.294	0.131	2.5839e-163	rods	chr6-136548684-136552525	MAP7	0	promoter
7.62395e-169	0.267727	0.081	0.012	2.90004e-163	rods	chr7-148367709-148368722	CNTNAP2	28249	distal
2.17246e-168	0.271398	0.121	0.031	8.2637e-163	rods	chr4-87052663-87054790	AFF1	45268	distal
2.29671e-168	0.288062	0.098	0.017	8.73635e-163	rods	chr1-38855612-38856751	RRAGC	3073	distal
3.47326e-168	0.295098	0.108	0.021	1.32117e-162	rods	chr15-60772476-60773434	RORA	-145013	distal
4.69982e-168	0.28698	0.12	0.028	1.78774e-162	rods	chr11-116453968-116455692			intergenic
5.67595e-168	0.288219	0.099	0.018	2.15905e-162	rods	chr6-23011582-23012523			intergenic
6.27977e-168	0.261622	0.35	0.171	2.38873e-162	rods	chr11-64339970-64344307	CCDC88B	0	promoter
6.99146e-168	0.301154	0.202	0.067	2.65945e-162	rods	chr1-54109484-54111939	TCEANC2	5190	distal
8.68575e-168	0.270094	0.17	0.056	3.30393e-162	rods	chr1-230792150-230796999	CAPN9	44736	distal
8.72431e-168	0.258876	0.056	0.004	3.3186e-162	rods	chr8-65682173-65683041	MTFR1	12301	distal
9.41511e-168	0.291054	0.125	0.03	3.58137e-162	rods	chr17-39138298-39140269	PLXDC1	11381	distal
1.35086e-167	0.258809	0.356	0.178	5.13847e-162	rods	chr11-61890236-61893461	FADS3	0	promoter
1.55323e-167	0.253965	0.076	0.012	5.90824e-162	rods	chr15-36701392-36702379	C15orf41	0	promoter
1.5944e-167	0.27593	0.106	0.022	6.06487e-162	rods	chr11-72497619-72498392	CLPB	-62939	distal
1.65964e-167	0.276017	0.2	0.073	6.313e-162	rods	chr6-3249899-3252419	PSMG4	-6475	distal
1.87837e-167	0.279953	0.11	0.024	7.14503e-162	rods	chr2-59447638-59448633			intergenic
2.48464e-167	0.271623	0.145	0.046	9.45119e-162	rods	chr20-64285419-64287125	PCMTD2	29652	distal
2.72469e-167	0.268423	0.075	0.01	1.03643e-161	rods	chr5-79416394-79417106	HOMER1	95689	distal
2.77851e-167	0.291713	0.113	0.024	1.0569e-161	rods	chr19-13691734-13694374	CCDC130	-37386	distal
3.11508e-167	0.277089	0.101	0.02	1.18493e-161	rods	chr18-9902431-9903314	VAPA	-10688	distal
3.15039e-167	0.27831	0.134	0.034	1.19836e-161	rods	chr11-100674783-100676129	ARHGAP42	-11524	distal
3.31904e-167	0.297077	0.188	0.063	1.26251e-161	rods	chr14-102543387-102546349	ANKRD9	-33588	distal
3.56393e-167	0.289732	0.157	0.044	1.35567e-161	rods	chr10-12396140-12397678	CAMK1D	46408	distal
4.26114e-167	0.276888	0.156	0.048	1.62088e-161	rods	chr5-180689031-180692030	FLT4	-39407	distal
4.6838e-167	0.289181	0.103	0.02	1.78165e-161	rods	chr3-78957266-78958012	ROBO1	60533	distal
4.68589e-167	0.267921	0.08	0.012	1.78244e-161	rods	chr4-15459912-15460766	CC2D2A	-9099	distal
5.37907e-167	0.276566	0.249	0.098	2.04612e-161	rods	chr14-104034481-104038136	ASPG	-47543	distal
6.59287e-167	0.276939	0.126	0.033	2.50783e-161	rods	chr14-23153604-23155855	SLC7A8	0	promoter
6.94472e-167	0.297933	0.16	0.045	2.64167e-161	rods	chr7-105664575-105666715	ATXN7L1	12448	distal
7.15703e-167	0.271776	0.093	0.016	2.72243e-161	rods	chr9-94199550-94200797	ZNF169	-58514	distal
7.40319e-167	0.290934	0.11	0.024	2.81606e-161	rods	chr1-31679157-31681916	COL16A1	22404	distal
7.60503e-167	0.28974	0.106	0.021	2.89284e-161	rods	chr9-77876026-77876997	GNAQ	154462	distal
1.01052e-166	0.267683	0.102	0.021	3.84387e-161	rods	chr19-30583829-30584829			intergenic
1.17301e-166	0.284578	0.097	0.017	4.46194e-161	rods	chr10-119008684-119009647	NANOS1	-20069	distal
1.53363e-166	0.278656	0.147	0.042	5.83371e-161	rods	chr15-78677444-78679568	CHRNB4	-36199	distal
1.85151e-166	0.263137	0.252	0.107	7.04285e-161	rods	chr20-32680648-32682290	C20orf203	-6707	distal
2.38445e-166	0.287845	0.152	0.042	9.07011e-161	rods	chr5-150529067-150531511	NDST1	20956	distal
2.59251e-166	0.266911	0.195	0.07	9.86152e-161	rods	chr14-101363865-101366452	DIO3	-194899	distal
3.34337e-166	0.287045	0.111	0.022	1.27177e-160	rods	chr16-19548535-19550013	C16orf62	-5402	distal
3.50067e-166	0.274955	0.115	0.027	1.3316e-160	rods	chr1-110300084-110301117	RBM15	-37389	distal
4.77551e-166	0.28418	0.111	0.024	1.81653e-160	rods	chr2-26749470-26750702	SLC35F6	-13586	distal
4.80046e-166	0.280618	0.096	0.018	1.82602e-160	rods	chr11-71940266-71941277	RNF121	11185	distal
4.80744e-166	0.269927	0.077	0.011	1.82868e-160	rods	chr9-89721881-89723295	GADD45G	116844	distal
7.59112e-166	0.260595	0.081	0.012	2.88755e-160	rods	chr6-5554958-5556625			intergenic
7.99876e-166	0.291376	0.104	0.02	3.04261e-160	rods	chr11-47007478-47008292	C11orf49	70701	distal
8.49773e-166	0.259992	0.073	0.01	3.23241e-160	rods	chr3-152304999-152305817	MBNL1	4806	distal
1.05217e-165	0.27478	0.107	0.023	4.00231e-160	rods	chr4-81353808-81356163	RASGEF1B	115074	distal
1.27035e-165	0.271114	0.105	0.023	4.8322e-160	rods	chr2-30248352-30250740	LBH	16173	distal
1.56193e-165	0.280116	0.148	0.041	5.94133e-160	rods	chr14-95190544-95193102	CLMN	1199	distal
1.77486e-165	0.269165	0.269	0.117	6.75129e-160	rods	chr15-73933613-73938073	LOXL1	7156	distal
1.82436e-165	0.277449	0.096	0.018	6.9396e-160	rods	chr16-52906095-52907203	RP11-467J12.4	145647	distal
1.91247e-165	0.286009	0.189	0.065	7.27476e-160	rods	chr2-41931893-41934952	C2orf91	18344	distal
2.10944e-165	0.276672	0.105	0.022	8.02399e-160	rods	chr19-47830321-47834855	CRX	8358	distal
3.86791e-165	0.275718	0.075	0.009	1.47129e-159	rods	chr5-7338180-7338789	ADCY2	-57419	distal
4.10292e-165	0.272938	0.09	0.016	1.56069e-159	rods	chr12-130668240-130669891	RIMBP2	46391	distal
4.18216e-165	0.270558	0.1	0.02	1.59083e-159	rods	chr10-101993126-101994597	C10orf76	61597	distal
6.00164e-165	0.27134	0.077	0.011	2.28294e-159	rods	chr2-54401987-54402879	SPTBN1	-53406	distal
1.28862e-164	0.271074	0.107	0.024	4.90171e-159	rods	chr2-127010966-127012397	BIN1	94605	distal
1.33416e-164	0.273637	0.105	0.023	5.07493e-159	rods	chr22-38327314-38329447	CSNK1E	-9230	distal
2.22584e-164	0.299199	0.202	0.065	8.46675e-159	rods	chr12-110965491-110967239	MYL2	-44914	distal
2.54731e-164	0.258941	0.341	0.167	9.6896e-159	rods	chr19-41350625-41355552	TGFB1;TMEM91	0	promoter
2.59789e-164	0.275719	0.123	0.031	9.88197e-159	rods	chr2-135743758-135745940	UBXN4	2140	distal
4.42e-164	0.271037	0.091	0.017	1.6813e-158	rods	chr3-12514888-12515837	TSEN2	25109	distal
5.42141e-164	0.250655	0.055	0.004	2.06222e-158	rods	chr6-22917249-22917915			intergenic
5.76598e-164	0.276405	0.099	0.02	2.19329e-158	rods	chr10-122518827-122520027	DMBT1	-40638	distal
6.13856e-164	0.277217	0.164	0.052	2.33502e-158	rods	chr17-4474167-4477972	SPNS2	-20866	distal
7.85086e-164	0.310233	0.194	0.06	2.98635e-158	rods	chr18-78230144-78232141			intergenic
7.89418e-164	0.286352	0.127	0.029	3.00283e-158	rods	chr1-10818548-10820211	CASZ1	-21898	distal
8.23039e-164	0.26395	0.088	0.016	3.13072e-158	rods	chr5-41837972-41839272	OXCT1	4386	distal
8.52667e-164	0.280347	0.255	0.107	3.24342e-158	rods	chr15-74049691-74054671	GOLGA6A	27880	distal
1.08474e-163	0.265022	0.063	0.006	4.12621e-158	rods	chr20-18901900-18902809	SCP2D1	88175	distal
1.45955e-163	0.271788	0.261	0.109	5.55192e-158	rods	chr22-44079092-44082275	PARVB	10032	distal
2.23688e-163	0.321402	0.161	0.043	8.50875e-158	rods	chr11-45077763-45080709	PRDM11	-15097	distal
3.35153e-163	0.277994	0.093	0.017	1.27487e-157	rods	chr8-28625933-28626831	EXTL3	3205	distal
3.36006e-163	0.281182	0.089	0.014	1.27812e-157	rods	chr19-20369518-20370631	ZNF737	195105	distal
3.69492e-163	0.287846	0.106	0.021	1.40549e-157	rods	chr8-33537282-33538391	C8orf41	-23681	distal
4.5564e-163	0.286124	0.1	0.019	1.73319e-157	rods	chr12-130116596-130118031	FZD10	-44428	distal
5.50774e-163	0.265731	0.074	0.01	2.09506e-157	rods	chr12-54063482-54064490	HOXC4	9606	distal
7.25267e-163	0.302688	0.093	0.014	2.75881e-157	rods	chr19-45635641-45636469	EML2	2935	distal
9.28787e-163	0.2654	0.079	0.013	3.53297e-157	rods	chr12-124239417-124240900	FAM101A	-48264	distal
1.02041e-162	0.257527	0.357	0.178	3.88148e-157	rods	chr9-132159736-132165100	NTNG2	0	promoter
1.07323e-162	0.259202	0.067	0.008	4.08241e-157	rods	chr6-10805619-10806334	MAK	24546	distal
1.09553e-162	0.268836	0.076	0.011	4.16722e-157	rods	chr6-22218101-22219556	PRL	77946	distal
1.20451e-162	0.271613	0.094	0.017	4.58179e-157	rods	chr3-9375215-9377044	THUMPD3	12118	distal
1.24288e-162	0.280884	0.082	0.012	4.72773e-157	rods	chr10-67428380-67429178			intergenic
1.48491e-162	0.274205	0.103	0.022	5.64836e-157	rods	chr6-138370867-138372992	RP3-422G23.4	-4913	distal
1.52455e-162	0.262472	0.074	0.01	5.79917e-157	rods	chr5-115381720-115382573	CCDC112	-84889	distal
1.65431e-162	0.281043	0.113	0.025	6.29273e-157	rods	chr5-77891779-77893941	TBCA	-22999	distal
2.50882e-162	0.290242	0.086	0.012	9.54319e-157	rods	chr19-9881496-9882364	OLFM2	-23328	distal
3.22462e-162	0.275273	0.094	0.017	1.2266e-156	rods	chr8-37721885-37722877	ERLIN2	-13722	distal
3.29876e-162	0.265611	0.087	0.015	1.2548e-156	rods	chr2-11967797-11968878			intergenic
3.31128e-162	0.287469	0.161	0.046	1.25956e-156	rods	chr11-74672569-74677798	CHRDL2	53378	distal
4.61899e-162	0.262465	0.074	0.01	1.75699e-156	rods	chr17-73205506-73207016	COG1	12517	distal
5.09763e-162	0.261335	0.158	0.05	1.93906e-156	rods	chr5-113140796-113143754	MCC	90924	distal
5.38985e-162	0.288115	0.088	0.013	2.05022e-156	rods	chr8-63810437-63811366			intergenic
6.40339e-162	0.298395	0.249	0.095	2.43575e-156	rods	chr7-4957341-4960899	MMD2	0	promoter
7.23364e-162	0.29071	0.105	0.02	2.75157e-156	rods	chr13-78215545-78216473			intergenic
8.7847e-162	0.265937	0.219	0.085	3.34157e-156	rods	chr15-66106895-66109806	MEGF11	18598	distal
1.09935e-161	0.272858	0.141	0.04	4.18177e-156	rods	chr16-84676356-84678995	USP10	-20983	distal
1.76229e-161	0.265034	0.141	0.041	6.70347e-156	rods	chr20-36099332-36102148	EPB41L1	6621	distal
2.04456e-161	0.282336	0.12	0.028	7.77718e-156	rods	chr15-33150139-33151668	FMN1	3247	distal
2.39507e-161	0.271253	0.114	0.028	9.11049e-156	rods	chr3-15344959-15345893	SH3BP5	-3591	distal
2.91853e-161	0.264058	0.25	0.107	1.11016e-155	rods	chr12-52872893-52875592	KRT78	-23899	distal
3.12035e-161	0.276525	0.172	0.056	1.18693e-155	rods	chr11-120610465-120614270	GRIK4	46032	distal
4.26414e-161	0.288795	0.134	0.032	1.62201e-155	rods	chr12-92622844-92625067	C12orf74	-77776	distal
5.26547e-161	0.264222	0.098	0.021	2.0029e-155	rods	chr12-14883587-14885051	MGP	807	distal
5.57313e-161	0.274386	0.144	0.041	2.11993e-155	rods	chr2-232292424-232295379	ALPP	-83155	distal
6.92224e-161	0.263842	0.08	0.012	2.63312e-155	rods	chr17-35085437-35086495	RFFL	2801	distal
7.70335e-161	0.29296	0.196	0.064	2.93024e-155	rods	chr1-40855536-40860125	CITED4	2242	distal
7.80027e-161	0.291577	0.139	0.037	2.96711e-155	rods	chr16-49794379-49796537	ZNF423	-13770	distal
8.61442e-161	0.262575	0.077	0.012	3.2768e-155	rods	chr19-41276665-41277887	HNRNPUL1	11544	distal
1.04936e-160	0.278204	0.115	0.026	3.99162e-155	rods	chr7-122369312-122370451	FEZF1	-64807	distal
1.06302e-160	0.274007	0.072	0.008	4.04357e-155	rods	chr3-57861786-57862487	SLMAP	-33752	distal
1.3486e-160	0.281891	0.102	0.019	5.12986e-155	rods	chr2-61848060-61848874	FAM161A	5180	distal
1.51161e-160	0.277701	0.156	0.047	5.74992e-155	rods	chr10-127415883-127417439	NPS	-131930	distal
1.52822e-160	0.275056	0.162	0.052	5.81313e-155	rods	chr9-134748593-134753416	COL5A1	106789	distal
1.62476e-160	0.281891	0.148	0.043	6.18035e-155	rods	chr2-238246964-238248529	HES6	-6840	distal
2.02886e-160	0.294913	0.209	0.071	7.71748e-155	rods	chr5-67377034-67378857	CD180	-180235	distal
2.14139e-160	0.276017	0.09	0.015	8.14554e-155	rods	chr21-36100652-36101927	SETD4	-21263	distal
2.24923e-160	0.297598	0.1	0.017	8.55574e-155	rods	chr21-31777407-31778395	SCAF4	-45332	distal
2.59201e-160	0.271228	0.124	0.031	9.85962e-155	rods	chr3-45941739-45943402	CXCR6	-70	promoter
2.87362e-160	0.257669	0.066	0.008	1.09308e-154	rods	chr15-66224584-66225789	MEGF11	27949	distal
2.89738e-160	0.254294	0.068	0.008	1.10212e-154	rods	chr3-76046901-76047934	ROBO2	140207	distal
3.63497e-160	0.277669	0.123	0.029	1.38269e-154	rods	chr6-134133049-134135527	SGK1	39338	distal
4.49345e-160	0.270931	0.24	0.101	1.70924e-154	rods	chr7-1058525-1061687	GPR146	3241	distal
4.57902e-160	0.288999	0.168	0.052	1.74179e-154	rods	chr22-24494033-24497277	UPB1	0	promoter
6.19182e-160	0.269926	0.101	0.021	2.35527e-154	rods	chr10-110864880-110866032	PDCD4	-5763	distal
6.29952e-160	0.27478	0.102	0.02	2.39624e-154	rods	chr4-138844773-138845882	NOCT	-169907	distal
8.77475e-160	0.296396	0.279	0.108	3.33778e-154	rods	chr10-102233513-102237487	PITX3	-1430	distal
9.03191e-160	0.256689	0.076	0.011	3.4356e-154	rods	chr14-64007778-64008871	SYNE2	-53911	distal
9.17652e-160	0.264533	0.069	0.008	3.49061e-154	rods	chr2-215341705-215342403	ATIC	29615	distal
9.76156e-160	0.252827	0.076	0.012	3.71315e-154	rods	chr5-93715245-93715833	POU5F2	25805	distal
9.76164e-160	0.27026	0.099	0.02	3.71318e-154	rods	chr12-8677042-8678020	MFAP5	-14158	distal
1.25718e-159	0.274238	0.097	0.018	4.78213e-154	rods	chr8-96591878-96594284	SDC2	11530	distal
1.76441e-159	0.280255	0.113	0.025	6.71154e-154	rods	chr11-47236152-47237564	NR1H3	-10736	distal
3.19821e-159	0.262092	0.085	0.014	1.21655e-153	rods	chr12-91763684-91765019			intergenic
3.36434e-159	0.262201	0.085	0.015	1.27975e-153	rods	chr11-96260172-96261496	MAML2	81685	distal
3.97435e-159	0.27247	0.101	0.022	1.51178e-153	rods	chr4-16608880-16609964			intergenic
4.46483e-159	0.262515	0.148	0.043	1.69835e-153	rods	chr12-89539442-89541248	POC1B-GALNT4	-13180	distal
4.62983e-159	0.269611	0.098	0.02	1.76112e-153	rods	chr5-14661739-14662612	OTULIN	-2136	distal
4.70809e-159	0.262889	0.181	0.061	1.79089e-153	rods	chr11-117632908-117635558	DSCAML1	161534	distal
5.3953e-159	0.263801	0.07	0.008	2.05229e-153	rods	chr6-29797374-29798509	HLA-G	-28458	distal
6.3668e-159	0.281623	0.133	0.035	2.42184e-153	rods	chr1-93976407-93978172	GCLM	-66951	distal
7.41415e-159	0.283006	0.136	0.035	2.82023e-153	rods	chr17-36110954-36112019	CCL4	7128	distal
8.91082e-159	0.286091	0.138	0.036	3.38954e-153	rods	chr3-150769702-150771236	SIAH2	-6325	distal
9.40992e-159	0.289727	0.175	0.055	3.57939e-153	rods	chr16-27636400-27638231	KIAA0556	86249	distal
9.69813e-159	0.2538	0.137	0.041	3.68902e-153	rods	chr7-127903710-127906143	LRRC4	124928	distal
1.39767e-158	0.266214	0.094	0.019	5.31654e-153	rods	chr5-149313100-149315307	GRPEL2	-30123	distal
1.42453e-158	0.253206	0.068	0.009	5.4187e-153	rods	chr15-90922084-90922904	UNC45A	-7276	distal
1.45232e-158	0.265866	0.082	0.013	5.52441e-153	rods	chrX-48092372-48093288	ZNF630	-20714	distal
1.48249e-158	0.261265	0.142	0.041	5.63916e-153	rods	chr20-46930852-46933942	EYA2	35983	distal
1.51014e-158	0.252737	0.073	0.011	5.74435e-153	rods	chr8-134728002-134728800	ZFAT	-14964	distal
1.67269e-158	0.259625	0.068	0.008	6.36268e-153	rods	chr17-67711525-67712723	NOL11	-5110	distal
1.77674e-158	0.26385	0.094	0.019	6.75844e-153	rods	chr3-69433291-69434506	FRMD4B	-47218	distal
1.89231e-158	0.258869	0.087	0.016	7.19806e-153	rods	chr8-58947513-58948528	TOX	170681	distal
2.61895e-158	0.281095	0.138	0.037	9.9621e-153	rods	chr6-158311203-158313464	TULP4	0	promoter
3.06355e-158	0.272231	0.103	0.021	1.16533e-152	rods	chr8-108468703-108470968	EMC2	25080	distal
3.46007e-158	0.285285	0.117	0.027	1.31616e-152	rods	chr9-34525769-34526619	ENHO	-2728	distal
4.25812e-158	0.273468	0.09	0.016	1.61972e-152	rods	chr6-3183274-3184262	TUBB2A	-25748	distal
4.37024e-158	0.277896	0.171	0.057	1.66237e-152	rods	chr19-3024450-3025927	TLE2	2430	distal
5.02777e-158	0.254761	0.078	0.013	1.91249e-152	rods	chr9-120533857-120534886	CDK5RAP2	45273	distal
5.54163e-158	0.256467	0.077	0.012	2.10795e-152	rods	chr8-37078179-37078917	KCNU1	149275	distal
6.98116e-158	0.284176	0.127	0.031	2.65553e-152	rods	chr7-151286402-151287658	SMARCD3	-8950	distal
8.24967e-158	0.279053	0.122	0.031	3.13805e-152	rods	chr4-150277737-150279073	DCLK2	198710	distal
9.18666e-158	0.267507	0.255	0.106	3.49447e-152	rods	chr17-27318193-27321327	WSB1	24063	distal
1.08254e-157	0.275844	0.126	0.032	4.1178e-152	rods	chr5-139193909-139195188	SIL1	1334	distal
1.25756e-157	0.254549	0.069	0.009	4.78357e-152	rods	chrX-9458155-9459216	TBL1X	-4079	distal
1.27539e-157	0.30223	0.111	0.023	4.85139e-152	rods	chr6-51182877-51184730			intergenic
1.3539e-157	0.26954	0.098	0.02	5.15004e-152	rods	chr10-72735468-72737035	MCU	42850	distal
1.91927e-157	0.276728	0.104	0.021	7.30063e-152	rods	chr1-18707592-18708875	PAX7	76069	distal
2.29125e-157	0.278606	0.125	0.031	8.71558e-152	rods	chr10-21069525-21070776	C10orf113	75784	distal
2.96865e-157	0.279946	0.151	0.045	1.12923e-151	rods	chr8-53018542-53019737	NPBWR1	80112	distal
3.14931e-157	0.274181	0.105	0.023	1.19795e-151	rods	chr1-7563732-7564918	CAMTA1	-180043	distal
3.8543e-157	0.278858	0.126	0.032	1.46612e-151	rods	chr8-54551566-54552476	RP1	-6693	distal
5.23365e-157	0.270394	0.083	0.013	1.9908e-151	rods	chr7-10904301-10905214	NDUFA4	35043	distal
6.11811e-157	0.287702	0.099	0.018	2.32724e-151	rods	chr10-129780161-129781140	EBF3	182702	distal
6.9521e-157	0.281248	0.133	0.035	2.64448e-151	rods	chr1-57769380-57771437			intergenic
8.16698e-157	0.2589	0.075	0.011	3.1066e-151	rods	chr11-104026758-104028109	DDI1	-8471	distal
1.03807e-156	0.264864	0.085	0.015	3.94867e-151	rods	chr21-39823032-39823931	PCP4	-43386	distal
1.13785e-156	0.285235	0.159	0.048	4.32821e-151	rods	chr1-223870252-223871502	TP53BP2	-24280	distal
1.24728e-156	0.264854	0.121	0.031	4.74448e-151	rods	chr6-97203166-97203963	MMS22L	78591	distal
1.34309e-156	0.269705	0.077	0.011	5.10892e-151	rods	chr1-11147165-11148300	MTOR	-15607	distal
1.5706e-156	0.267742	0.113	0.027	5.97435e-151	rods	chr15-47651245-47654154	SEMA6D	-63209	distal
1.86364e-156	0.266913	0.083	0.013	7.08901e-151	rods	chr10-31720741-31721699	ARHGAP12	187176	distal
2.06492e-156	0.265919	0.071	0.009	7.85465e-151	rods	chr16-59711223-59712010			intergenic
2.07511e-156	0.268811	0.129	0.035	7.89341e-151	rods	chr8-1704862-1706821	CLN8	-56883	distal
2.51529e-156	0.265006	0.091	0.018	9.56777e-151	rods	chrX-9502979-9503906	TBL1X	-27077	distal
2.82631e-156	0.254544	0.068	0.008	1.07509e-150	rods	chr1-2222836-2223420	SKI	-5275	distal
4.05897e-156	0.276433	0.151	0.045	1.54397e-150	rods	chr21-45570455-45572727	SLC19A1	-26044	distal
4.36856e-156	0.254621	0.325	0.158	1.66173e-150	rods	chr16-50467330-50470492	NKD1	-77838	distal
5.33293e-156	0.277329	0.105	0.022	2.02857e-150	rods	chr3-120838342-120839172	STXBP5L	-68900	distal
5.52882e-156	0.250212	0.168	0.061	2.10308e-150	rods	chr1-205000938-205004251	CNTN2	-38717	distal
5.5293e-156	0.320264	0.13	0.027	2.10326e-150	rods	chr1-208774673-208775914			intergenic
5.5955e-156	0.262107	0.078	0.013	2.12844e-150	rods	chr19-12969002-12970200	DAND5	0	promoter
5.96733e-156	0.266608	0.075	0.011	2.26988e-150	rods	chr7-32027634-32028437	PDE1C	42413	distal
6.49204e-156	0.273025	0.099	0.02	2.46947e-150	rods	chr13-60157932-60159026	DIAPH3	4741	distal
7.90717e-156	0.270701	0.102	0.021	3.00777e-150	rods	chr4-165947013-165949167	TLL1	73274	distal
8.35638e-156	0.268609	0.221	0.085	3.17864e-150	rods	chr1-206036898-206038660	CTSE	-12989	distal
8.36308e-156	0.266354	0.106	0.024	3.18119e-150	rods	chrX-154139267-154141300	OPN1LW	-2924	distal
9.48914e-156	0.271283	0.092	0.017	3.60952e-150	rods	chr3-58682775-58684351	FAM3D	-15927	distal
1.08499e-155	0.269225	0.103	0.023	4.12715e-150	rods	chr5-126004354-126005181			intergenic
1.10092e-155	0.261144	0.079	0.013	4.18773e-150	rods	chr6-113718637-113719589	MARCKS	-137773	distal
1.23174e-155	0.282091	0.142	0.041	4.68534e-150	rods	chr2-200086569-200087792	TYW5	-130833	distal
1.29687e-155	0.255936	0.206	0.082	4.93309e-150	rods	chr5-149422077-149424311	IL17B	-42801	distal
1.5291e-155	0.264817	0.069	0.008	5.81647e-150	rods	chr22-37220590-37221377	SSTR3	-8268	distal
1.72783e-155	0.271076	0.126	0.032	6.57241e-150	rods	chr12-124577825-124579708	NCOR2	-42222	distal
1.82185e-155	0.261319	0.083	0.015	6.93005e-150	rods	chr11-68830026-68830895	CPT1A	11022	distal
2.64823e-155	0.292031	0.128	0.031	1.00735e-149	rods	chr16-84093185-84094551	MBTPS1	22356	distal
2.95768e-155	0.293422	0.107	0.021	1.12506e-149	rods	chr8-92659389-92660205			intergenic
2.97268e-155	0.271461	0.091	0.016	1.13076e-149	rods	chr3-175771385-175772285			intergenic
3.29401e-155	0.266111	0.143	0.042	1.25299e-149	rods	chr17-64081603-64083122	ERN1	47004	distal
3.6019e-155	0.265101	0.093	0.019	1.37011e-149	rods	chr11-126411352-126412696	ST3GAL4	4893	distal
5.2845e-155	0.252334	0.065	0.008	2.01015e-149	rods	chr1-36995828-36996631	GRIK3	37495	distal
5.93876e-155	0.264298	0.082	0.014	2.25902e-149	rods	chr10-101822316-101823206	MGEA5	-3851	distal
5.94601e-155	0.250865	0.061	0.006	2.26177e-149	rods	chr1-28220308-28220928	DNAJC8	12098	distal
8.34037e-155	0.2539	0.08	0.014	3.17255e-149	rods	chr17-41983675-41984798	CNP	16861	distal
1.03286e-154	0.271195	0.072	0.008	3.92884e-149	rods	chr15-89007878-89008801	ABHD2	-79349	distal
1.35175e-154	0.258855	0.111	0.027	5.14185e-149	rods	chr5-80368672-80371282	ZFYVE16	-36731	distal
1.46312e-154	0.255069	0.178	0.066	5.5655e-149	rods	chr4-14867310-14868600	CPEB2	-134074	distal
1.60837e-154	0.2916	0.112	0.023	6.11799e-149	rods	chr10-73994630-73995791	VCL	-2323	distal
2.01788e-154	0.254436	0.068	0.009	7.6757e-149	rods	chr20-62729998-62730928	NTSR1	21162	distal
2.03204e-154	0.258157	0.075	0.011	7.72957e-149	rods	chr9-10701618-10702646	PTPRD	-88895	distal
2.12457e-154	0.270704	0.2	0.075	8.08155e-149	rods	chr22-47138895-47141099			intergenic
2.12493e-154	0.250571	0.289	0.134	8.08292e-149	rods	chr4-7526264-7533646	PSAPL1	-91291	distal
3.015e-154	0.265599	0.139	0.04	1.14686e-148	rods	chr11-59764416-59767389	STX3	8965	distal
3.70337e-154	0.263532	0.137	0.039	1.40871e-148	rods	chr3-183400146-183401343	MCF2L2	26635	distal
4.60569e-154	0.268296	0.096	0.019	1.75193e-148	rods	chr17-80614632-80616135	RPTOR	69165	distal
4.73944e-154	0.26165	0.195	0.069	1.80281e-148	rods	chr11-61643807-61646305	DAGLA	-34128	distal
5.08719e-154	0.262514	0.081	0.013	1.93509e-148	rods	chr1-202367040-202367825	PPP1R12B	18313	distal
5.66491e-154	0.265065	0.267	0.115	2.15485e-148	rods	chr8-141268068-141272923	SLC45A4	-13839	distal
5.69285e-154	0.283544	0.177	0.058	2.16548e-148	rods	chrX-13376668-13378372	ATXN3L	-56269	distal
5.99463e-154	0.26331	0.103	0.025	2.28027e-148	rods	chr1-12510078-12511346	VPS13D	45139	distal
6.15181e-154	0.277308	0.125	0.032	2.34006e-148	rods	chr3-142273007-142274187	GK5	-47400	distal
7.18754e-154	0.278989	0.123	0.03	2.73403e-148	rods	chr7-74097810-74098830	LIMK1	4732	distal
7.41039e-154	0.264643	0.096	0.019	2.8188e-148	rods	chr5-128154955-128156899	SLC12A2	71108	distal
8.68961e-154	0.254094	0.064	0.007	3.3054e-148	rods	chr13-99778278-99778923	CLYBL	171583	distal
1.13143e-153	0.268514	0.071	0.009	4.30377e-148	rods	chrX-75985196-75986411	PBDC1	-186525	distal
1.13916e-153	0.288419	0.088	0.014	4.33318e-148	rods	chr7-116979172-116980038	ST7	25794	distal
1.15497e-153	0.261979	0.126	0.036	4.39333e-148	rods	chr11-30535510-30536687	MPPED2	43810	distal
1.24439e-153	0.264031	0.088	0.016	4.73349e-148	rods	chr19-56269233-56270069	EDDM13	-31921	distal
1.28868e-153	0.27062	0.196	0.072	4.90194e-148	rods	chr19-35819302-35820460	PRODH2	-6003	distal
1.4912e-153	0.251691	0.226	0.094	5.67228e-148	rods	chr15-78624867-78628009	CHRNA3	-3572	distal
1.49195e-153	0.251268	0.067	0.009	5.67516e-148	rods	chr3-123600775-123601692	HACD2	-15590	distal
2.10652e-153	0.261381	0.075	0.011	8.01288e-148	rods	chr16-77207002-77208712	SYCE1L	7606	distal
3.25393e-153	0.264967	0.108	0.025	1.23775e-147	rods	chr3-64103655-64105660	PSMD6	-79645	distal
3.54728e-153	0.252854	0.111	0.03	1.34933e-147	rods	chr2-67953324-67954861	C1D	108122	distal
4.08312e-153	0.277424	0.072	0.008	1.55316e-147	rods	chr10-78103424-78104231	RPS24	69562	distal
5.02436e-153	0.27648	0.132	0.035	1.91119e-147	rods	chr12-49222545-49224358	TUBA1C	-3568	distal
5.5524e-153	0.282462	0.132	0.034	2.11205e-147	rods	chr14-94114517-94116369	IFI27	3703	distal
6.19623e-153	0.274538	0.126	0.032	2.35695e-147	rods	chr20-58084811-58085830	C20orf85	-65074	distal
6.48285e-153	0.254358	0.092	0.019	2.46598e-147	rods	chr20-25531130-25533316	NINL	52202	distal
6.88759e-153	0.263263	0.141	0.042	2.61993e-147	rods	chr2-23508988-23511060	KLHL29	123772	distal
7.81801e-153	0.27735	0.077	0.01	2.97385e-147	rods	chr7-109652598-109653248			intergenic
1.18241e-152	0.263102	0.101	0.022	4.49772e-147	rods	chr15-87764040-87765558			intergenic
2.16777e-152	0.280411	0.149	0.044	8.24589e-147	rods	chr5-38263899-38267917	EGFLAM	5491	distal
2.31229e-152	0.256044	0.099	0.023	8.79559e-147	rods	chr10-74947583-74948696	KAT6B	108884	distal
2.81281e-152	0.286626	0.152	0.045	1.06995e-146	rods	chr18-6560910-6562604	L3MBTL4	-145999	distal
3.26982e-152	0.257136	0.083	0.015	1.24379e-146	rods	chr19-29206509-29207310	UQCRFS1	6232	distal
3.90897e-152	0.264374	0.093	0.018	1.48691e-146	rods	chr18-73551023-73552642			intergenic
4.78388e-152	0.270039	0.125	0.034	1.81972e-146	rods	chr17-80978234-80979678	CHMP6	-12163	distal
5.1647e-152	0.277159	0.098	0.019	1.96457e-146	rods	chr5-139154332-139155990	SIL1	40532	distal
6.23588e-152	0.26201	0.082	0.014	2.37204e-146	rods	chr16-19594901-19596050	C16orf62	16178	distal
9.54519e-152	0.265852	0.083	0.014	3.63085e-146	rods	chr19-53273719-53274483	VN1R4	-5996	distal
1.39598e-151	0.257166	0.15	0.049	5.31008e-146	rods	chr14-90809942-90813222	TTC7B	3196	distal
1.55119e-151	0.276985	0.156	0.046	5.90049e-146	rods	chr1-57328837-57330925	DAB1	-37669	distal
1.94969e-151	0.260044	0.1	0.022	7.41631e-146	rods	chr12-21551466-21553711	SPX	25160	distal
1.9904e-151	0.264012	0.278	0.122	7.57118e-146	rods	chr17-27491065-27498774	KSR1	19056	distal
2.32497e-151	0.250352	0.072	0.011	8.84385e-146	rods	chr5-147599456-147600808	DPYSL3	-89400	distal
2.57302e-151	0.265782	0.098	0.021	9.78739e-146	rods	chr11-87417656-87419007			intergenic
2.89195e-151	0.270427	0.16	0.051	1.10006e-145	rods	chr1-35776813-35778065	CLSPN	-6846	distal
3.04578e-151	0.292705	0.147	0.04	1.15857e-145	rods	chr1-18137740-18140948	IGSF21	29995	distal
3.11291e-151	0.274408	0.174	0.058	1.18411e-145	rods	chr2-98376157-98378346	CNGA3	0	promoter
3.13763e-151	0.26071	0.133	0.038	1.19351e-145	rods	chr12-94730859-94734150	TMCC3	-80297	distal
3.29182e-151	0.296132	0.133	0.032	1.25216e-145	rods	chr13-25192273-25193958	AMER2	-19985	distal
3.31752e-151	0.278814	0.085	0.013	1.26194e-145	rods	chrX-85504191-85505121	POF1B	-124448	distal
3.48804e-151	0.265243	0.087	0.016	1.3268e-145	rods	chr14-31223201-31223872	HECTD1	-15397	distal
4.52776e-151	0.253778	0.078	0.013	1.72229e-145	rods	chr6-156274902-156276987			intergenic
4.55626e-151	0.270167	0.124	0.032	1.73313e-145	rods	chr10-22552588-22553664	PIP4K2A	38050	distal
5.2163e-151	0.260063	0.193	0.07	1.9842e-145	rods	chr19-39138061-39141348	PAK4	12228	distal
7.1389e-151	0.259803	0.139	0.04	2.71553e-145	rods	chr21-26096178-26098003	APP	42458	distal
7.5517e-151	0.268155	0.113	0.029	2.87255e-145	rods	chr10-16491260-16492783	PTER	6926	distal
7.69858e-151	0.269808	0.165	0.054	2.92843e-145	rods	chr6-14309372-14312532	CD83	191732	distal
1.01423e-150	0.273989	0.211	0.076	3.85799e-145	rods	chr17-29064650-29067911	TIAF1	10947	distal
1.29791e-150	0.274954	0.083	0.014	4.93706e-145	rods	chr18-42165708-42167161	PIK3C3	127937	distal
1.31001e-150	0.264409	0.169	0.055	4.98308e-145	rods	chr1-109611117-109613610	GNAT2	0	promoter
1.31419e-150	0.268928	0.128	0.033	4.99896e-145	rods	chr1-115192438-115193909	TSPAN2	-102938	distal
1.62677e-150	0.266806	0.16	0.052	6.18801e-145	rods	chr5-56514587-56517796	C5orf67	17435	distal
1.96447e-150	0.265122	0.192	0.069	7.47255e-145	rods	chr14-75242046-75243354	FOS	-35420	distal
2.25149e-150	0.26204	0.095	0.02	8.56432e-145	rods	chr13-49657026-49657876	ARL11	28728	distal
2.6712e-150	0.258787	0.099	0.023	1.01609e-144	rods	chr11-45489143-45490169	CHST1	175454	distal
3.35039e-150	0.258312	0.104	0.025	1.27444e-144	rods	chr15-92325848-92328176	ST8SIA2	-65652	distal
3.72669e-150	0.259006	0.256	0.111	1.41758e-144	rods	chr12-128852695-128854971	GLT1D1	0	promoter
4.44614e-150	0.270244	0.112	0.025	1.69125e-144	rods	chr15-52003381-52006237	MAPK6	-12964	distal
5.30605e-150	0.287574	0.176	0.056	2.01834e-144	rods	chr16-85673467-85679188	GINS2	9812	distal
7.00323e-150	0.266299	0.08	0.012	2.66392e-144	rods	chr16-28565980-28566805	SGF29	12055	distal
7.16337e-150	0.256382	0.08	0.013	2.72484e-144	rods	chr2-177284212-177285029	NFE2L2	-19081	distal
8.13792e-150	0.275301	0.112	0.027	3.09554e-144	rods	chr1-25552275-25554150	LDLRAP1	8696	distal
1.04302e-149	0.26891	0.151	0.047	3.96751e-144	rods	chr1-54774343-54775618	PARS2	-9829	distal
1.3175e-149	0.281761	0.103	0.02	5.01156e-144	rods	chr10-71872224-71873091	PSAP	-20849	distal
1.54466e-149	0.27492	0.103	0.023	5.87564e-144	rods	chr1-153538010-153538947	S100A5	1748	distal
1.93743e-149	0.275569	0.168	0.052	7.36968e-144	rods	chr15-90894961-90896450	MAN2A2	-6542	distal
2.20478e-149	0.251578	0.081	0.015	8.38665e-144	rods	chr12-130700522-130701743	RIMBP2	14539	distal
3.15856e-149	0.267092	0.076	0.011	1.20147e-143	rods	chr16-3497693-3498510	C16orf90	-2269	distal
3.50057e-149	0.25655	0.161	0.055	1.33157e-143	rods	chr20-47149840-47151297	EYA2	159840	distal
3.76735e-149	0.259109	0.139	0.043	1.43304e-143	rods	chr12-111812335-111813724	MAPKAPK5	-28254	distal
3.95411e-149	0.268587	0.173	0.061	1.50408e-143	rods	chr16-4244092-4245803	SRL	-2012	distal
4.51611e-149	0.289411	0.112	0.024	1.71786e-143	rods	chr1-76880388-76881204	ST6GALNAC5	12948	distal
4.58288e-149	0.26349	0.113	0.028	1.74326e-143	rods	chr2-235292577-235293721			intergenic
5.34157e-149	0.265526	0.074	0.01	2.03185e-143	rods	chr1-245544949-245546164	KIF26B	33948	distal
5.34176e-149	0.254119	0.07	0.01	2.03192e-143	rods	chr3-85140387-85141588	CADM2	180842	distal
5.69801e-149	0.279046	0.09	0.015	2.16744e-143	rods	chr10-48487080-48487948	ARHGAP22	5702	distal
5.92103e-149	0.254235	0.083	0.015	2.25227e-143	rods	chr5-143614682-143615475	NR3C1	-179170	distal
6.67172e-149	0.257207	0.125	0.035	2.53782e-143	rods	chr8-60834479-60836445	CHD7	93047	distal
7.20991e-149	0.260859	0.085	0.015	2.74254e-143	rods	chr11-69599199-69600051	CCND1	-41036	distal
7.34298e-149	0.26656	0.141	0.041	2.79316e-143	rods	chr16-750449-752494	MSLN	-8268	distal
1.22961e-148	0.271302	0.187	0.064	4.67727e-143	rods	chr5-143031790-143033149	ARHGAP26	156898	distal
1.23738e-148	0.252535	0.188	0.071	4.70681e-143	rods	chr10-103541973-103544276	NEURL1	47995	distal
1.39423e-148	0.283361	0.124	0.03	5.30342e-143	rods	chr1-156527201-156528275	MEF2D	-26373	distal
1.73966e-148	0.258423	0.095	0.02	6.61739e-143	rods	chr19-34232464-34234106	KIAA0355	-20431	distal
1.9807e-148	0.268016	0.125	0.032	7.53427e-143	rods	chr19-14139646-14140505	ASF1B	-2690	distal
2.16724e-148	0.252134	0.095	0.021	8.24387e-143	rods	chr1-22507440-22508234	EPHA8	-55330	distal
2.33913e-148	0.263137	0.083	0.013	8.8977e-143	rods	chr12-128297033-128297753	TMEM132C	29631	distal
2.46336e-148	0.269707	0.089	0.016	9.37026e-143	rods	chr2-138958941-138959764	NXPH2	-178593	distal
2.48597e-148	0.26037	0.084	0.015	9.45625e-143	rods	chr1-83623890-83624973			intergenic
2.67758e-148	0.266884	0.101	0.022	1.01851e-142	rods	chr17-33986329-33987492	ASIC2	169803	distal
2.97101e-148	0.251798	0.16	0.055	1.13013e-142	rods	chr18-387696-390330	COLEC12	110393	distal
3.22763e-148	0.255818	0.074	0.012	1.22774e-142	rods	chr2-41350205-41350829			intergenic
3.73088e-148	0.272541	0.152	0.045	1.41917e-142	rods	chr11-75654775-75657354	MAP6	11081	distal
3.84251e-148	0.264261	0.085	0.015	1.46163e-142	rods	chr1-55697552-55698253			intergenic
4.09188e-148	0.258046	0.09	0.018	1.55649e-142	rods	chr15-63492088-63494702	USP3	-9809	distal
5.14508e-148	0.265126	0.082	0.013	1.95711e-142	rods	chr9-111632933-111633737	DNAJC25-GNG10	1548	distal
5.62395e-148	0.266608	0.115	0.028	2.13927e-142	rods	chr11-75313253-75314371	ARRB1	37335	distal
6.00545e-148	0.258425	0.086	0.016	2.28438e-142	rods	chr4-26404375-26405427	RBPJ	41940	distal
6.49316e-148	0.260113	0.083	0.015	2.4699e-142	rods	chr7-79965839-79966572	GNAI1	-168216	distal
6.85989e-148	0.253482	0.073	0.011	2.6094e-142	rods	chr7-53292207-53292867			intergenic
9.77679e-148	0.290151	0.119	0.026	3.71894e-142	rods	chr1-108955478-108956529	CLCC1	-5030	distal
1.14731e-147	0.26167	0.115	0.028	4.3642e-142	rods	chr1-9551373-9552579	SLC25A33	11892	distal
1.61428e-147	0.259239	0.231	0.095	6.14048e-142	rods	chr13-98288977-98290458	RNF113B	-111712	distal
1.74825e-147	0.280246	0.134	0.036	6.65007e-142	rods	chr19-7512047-7513146	ZNF358	-2972	distal
2.06073e-147	0.252086	0.076	0.013	7.83871e-142	rods	chr6-70351759-70352836	COL9A1	-48676	distal
2.20347e-147	0.2704	0.1	0.021	8.38165e-142	rods	chr12-98304126-98305924			intergenic
2.30578e-147	0.28553	0.085	0.013	8.77085e-142	rods	chr1-201423601-201424817	TNNI1	-1580	distal
2.30742e-147	0.257626	0.104	0.024	8.77706e-142	rods	chr2-48478625-48480900	PPP1R21	37829	distal
2.41252e-147	0.263604	0.105	0.024	9.17686e-142	rods	chr17-67484032-67486878	PITPNC1	105878	distal
2.72376e-147	0.261836	0.102	0.023	1.03608e-141	rods	chr2-2586935-2588257			intergenic
4.50411e-147	0.25106	0.12	0.034	1.7133e-141	rods	chr11-117704345-117707190	DSCAML1	89902	distal
4.62856e-147	0.277382	0.117	0.029	1.76064e-141	rods	chr8-125176999-125178459	NSMCE2	52856	distal
4.90755e-147	0.261013	0.24	0.1	1.86676e-141	rods	chr10-100863528-100867506	SLF2	-45063	distal
7.88316e-147	0.283203	0.071	0.008	2.99863e-141	rods	chr2-237948221-237948920	UBE2F	-18035	distal
8.94804e-147	0.269665	0.25	0.108	3.4037e-141	rods	chr17-49569544-49573139	NXPH3	-2719	distal
9.18158e-147	0.267214	0.112	0.028	3.49253e-141	rods	chr12-79080518-79081551	SYT1	34888	distal
1.29377e-146	0.253383	0.088	0.017	4.92132e-141	rods	chr19-30441191-30443199	ZNF536	68780	distal
1.39621e-146	0.276397	0.194	0.072	5.31097e-141	rods	chr16-84951864-84953753	ZDHHC7	57750	distal
1.67919e-146	0.262512	0.076	0.011	6.38739e-141	rods	chr16-65491758-65492698			intergenic
1.82352e-146	0.279036	0.143	0.039	6.93638e-141	rods	chr10-5643043-5646852	ASB13	19727	distal
1.92863e-146	0.277892	0.221	0.086	7.33623e-141	rods	chr9-126676023-126678200	LMX1B	61555	distal
2.23504e-146	0.252431	0.084	0.016	8.50176e-141	rods	chrX-120363602-120364592	ATP1B4	1491	distal
2.51733e-146	0.262124	0.126	0.036	9.57556e-141	rods	chr14-50383162-50384674	CDKL1	11226	distal
2.56377e-146	0.257405	0.074	0.011	9.7522e-141	rods	chr15-33184522-33185347	FMN1	9350	distal
2.75349e-146	0.267551	0.131	0.036	1.04739e-140	rods	chr5-125267298-125268606			intergenic
3.0334e-146	0.26754	0.067	0.007	1.15386e-140	rods	chrX-124069719-124070393	STAG2	107981	distal
3.62183e-146	0.270015	0.125	0.034	1.37769e-140	rods	chr19-17260544-17261471	USHBP1	3254	distal
5.09797e-146	0.271161	0.138	0.039	1.93919e-140	rods	chr15-91118277-91119620	SV2B	17993	distal
5.12453e-146	0.255761	0.311	0.146	1.9493e-140	rods	chr5-31852993-31856696			intergenic
5.29178e-146	0.25958	0.077	0.012	2.01291e-140	rods	chr1-84571321-84572342	CTBS	2123	distal
7.06523e-146	0.26024	0.104	0.023	2.68751e-140	rods	chr5-157130902-157133643	MED7	9133	distal
8.07283e-146	0.263013	0.099	0.022	3.07078e-140	rods	chr7-44842387-44843315	H2AFV	4707	distal
8.9162e-146	0.256341	0.077	0.012	3.39159e-140	rods	chr2-19335251-19335982	OSR1	22672	distal
9.28729e-146	0.261331	0.159	0.052	3.53275e-140	rods	chr10-78211041-78213428	RPS24	177179	distal
1.07865e-145	0.288454	0.175	0.056	4.10302e-140	rods	chr11-67521998-67525648	CABP2	0	promoter
1.66776e-145	0.259402	0.157	0.05	6.34389e-140	rods	chr5-133534576-133536241	FSTL4	67754	distal
1.67875e-145	0.25232	0.092	0.021	6.38572e-140	rods	chr2-164909355-164910993	SLC38A11	44254	distal
1.86463e-145	0.251292	0.067	0.009	7.09276e-140	rods	chr10-10090046-10091308			intergenic
1.9561e-145	0.26063	0.095	0.021	7.44073e-140	rods	chr6-18162260-18163188	KDM1B	6809	distal
2.56411e-145	0.259096	0.175	0.063	9.7535e-140	rods	chr4-165397805-165401700	CPE	18864	distal
3.11679e-145	0.267053	0.081	0.013	1.18558e-139	rods	chr11-118541793-118542612	TMEM25	10404	distal
3.18362e-145	0.256053	0.075	0.011	1.211e-139	rods	chr6-52456773-52457635	EFHC1	32965	distal
3.40157e-145	0.283494	0.151	0.042	1.29391e-139	rods	chr7-75562633-75564141	HIP1	47562	distal
4.60924e-145	0.261858	0.107	0.026	1.75329e-139	rods	chr9-122561782-122562792	OR1L8	5768	distal
4.6636e-145	0.25994	0.175	0.064	1.77396e-139	rods	chr15-77998297-78001485	TBC1D2B	76168	distal
5.13636e-145	0.273391	0.148	0.045	1.95379e-139	rods	chr6-108617930-108620299	FOXO3	-36047	distal
5.4325e-145	0.279096	0.114	0.027	2.06644e-139	rods	chr2-133434740-133435789	NCKAP5	132672	distal
5.44861e-145	0.259632	0.163	0.055	2.07257e-139	rods	chr20-20782780-20784428	RALGAPA2	-70292	distal
5.87045e-145	0.264368	0.104	0.024	2.23303e-139	rods	chr20-48234299-48236880			intergenic
6.58031e-145	0.282558	0.133	0.034	2.50305e-139	rods	chr12-75930542-75932159	PHLDA1	99446	distal
7.21107e-145	0.270185	0.106	0.024	2.74298e-139	rods	chr9-93856459-93857357	BARX1	96075	distal
7.96214e-145	0.252083	0.09	0.019	3.02868e-139	rods	chr10-68622907-68624088	TET1	62252	distal
8.00971e-145	0.272077	0.213	0.081	3.04677e-139	rods	chr17-76838928-76842875	MGAT5B	-25581	distal
8.05176e-145	0.273954	0.169	0.057	3.06277e-139	rods	chr1-39170224-39174794	MACF1	-29452	distal
9.0568e-145	0.256969	0.152	0.049	3.44507e-139	rods	chr16-55441972-55445257	MMP2	-33714	distal
1.1908e-144	0.277241	0.131	0.035	4.52962e-139	rods	chr1-63843020-63844849	ROR1	68978	distal
1.21492e-144	0.265756	0.184	0.063	4.62139e-139	rods	chr16-22263734-22266096	POLR3E	-31279	distal
1.2601e-144	0.285696	0.17	0.056	4.79324e-139	rods	chr8-70804814-70806052	XKR9	135417	distal
1.36466e-144	0.278895	0.096	0.018	5.19097e-139	rods	chr4-175576933-175578039			intergenic
1.40494e-144	0.26525	0.089	0.017	5.34418e-139	rods	chr13-48527464-48528483	RCBTB2	4751	distal
1.54092e-144	0.272586	0.107	0.023	5.86145e-139	rods	chr17-56159094-56160324	ANKFN1	5585	distal
1.82162e-144	0.260273	0.087	0.017	6.92918e-139	rods	chr12-120042934-120043978	CCDC64	53066	distal
1.95598e-144	0.255278	0.073	0.011	7.44025e-139	rods	chr6-110004350-110005472	GPR6	25238	distal
1.96557e-144	0.252872	0.074	0.012	7.47674e-139	rods	chr4-148342011-148343071	NR3C2	93790	distal
[truncated: 47,225 more rows]
