# Supplementary material for: Single-cell analyses reveal transient retinal progenitor cells in the ciliary margin of developing human retina
Source: Nat Commun. 2024 Apr 26;15:3567. doi: 10.1038/s41467-024-47933-x (PMC11053058; doi:10.1038/s41467-024-47933-x)
Supplement: Supplementary file 10 — Supplementary Data 7 [file 41467_2024_47933_MOESM10_ESM.xlsx]

## Sheet: chromvar_enriched_motifs
	p_val	avg_diff	pct.1	pct.2	p_val_adj	cluster	motif	name
1	0	4.01764	0.957	0.326	0	rods	MA0467.1	Crx
2	0	3.95869	0.964	0.329	0	rods	MA0712.2	OTX2
3	0	3.94202	0.964	0.332	0	rods	MA0891.1	GSC2
4	0	3.67589	0.952	0.341	0	rods	MA0648.1	GSC
5	0	3.54432	0.958	0.343	0	rods	MA1547.1	PITX2
6	0	3.4248	0.951	0.338	0	rods	MA0714.1	PITX3
7	0	3.38514	0.943	0.327	0	rods	MA0883.1	Dmbx1
8	0	3.26389	0.934	0.341	0	rods	MA1480.1	DPRX
9	0	3.21765	0.942	0.346	0	rods	MA0682.2	PITX1
10	0	2.93691	0.936	0.347	0	rods	MA0719.1	RHOXF1
11	0	1.60191	0.826	0.387	0	rods	MA0711.1	OTX1
12	0	1.05649	0.785	0.429	0	rods	MA0748.2	YY2
13	0	1.04242	0.746	0.427	0	rods	MA0035.4	GATA1
14	0	0.901061	0.819	0.447	0	rods	MA1587.1	ZNF135
15	0	0.745652	0.7	0.442	0	rods	MA0864.2	E2F2
16	0	0.737846	0.72	0.456	0	rods	MA0660.1	MEF2B
17	0	0.702472	0.701	0.447	0	rods	MA0028.2	ELK1
18	0	0.699892	0.644	0.396	0	rods	MA0506.1	NRF1
19	0	0.644117	0.733	0.436	0	rods	MA1516.1	KLF3
20	0	0.539487	0.751	0.443	0	rods	MA0079.4	SP1
21	0	0.425982	0.675	0.45	0	rods	MA1517.1	KLF6
22	0	0.420339	0.673	0.439	0	rods	MA0740.1	KLF14
23	0	0.410425	0.718	0.446	0	rods	MA1596.1	ZNF460
24	0	0.347472	0.662	0.442	0	rods	MA1515.1	KLF2
25	3.01583e-300	0.50848	0.658	0.463	2.24981e-297	rods	MA0773.1	MEF2D
26	5.36989e-292	0.55146	0.676	0.488	4.00594e-289	rods	MA0728.1	Nr2f6(var.2)
27	4.42334e-254	0.53331	0.659	0.476	3.29981e-251	rods	MA0829.2	SREBF1(var.2)
28	5.60785e-230	0.461496	0.641	0.462	4.18346e-227	rods	MA0759.1	ELK3
29	1.02835e-223	0.280017	0.601	0.419	7.67147e-221	rods	MA1513.1	KLF15
30	2.24615e-197	0.269295	0.628	0.452	1.67563e-194	rods	MA0685.1	SP4
31	1.71461e-196	0.432195	0.63	0.468	1.2791e-193	rods	MA0156.2	FEV
32	7.56175e-186	0.421055	0.636	0.47	5.64107e-183	rods	MA0763.1	ETV3
33	7.25706e-179	0.338702	0.635	0.478	5.41377e-176	rods	MA0742.1	Klf12
34	4.60274e-155	0.376545	0.597	0.453	3.43364e-152	rods	MA0470.2	E2F4
35	4.11379e-143	0.399296	0.634	0.5	3.06889e-140	rods	MA0859.1	Rarg
36	1.86912e-141	0.367991	0.566	0.429	1.39436e-138	rods	MA0527.1	ZBTB33
37	6.68768e-116	0.292975	0.604	0.475	4.98901e-113	rods	MA0076.2	ELK4
38	4.2782e-115	0.313082	0.581	0.458	3.19154e-112	rods	MA0594.2	HOXA9
39	2.94309e-92	0.269746	0.593	0.477	2.19554e-89	rods	MA0095.2	YY1
40	0	2.08696	0.918	0.484	0	MG	MA1528.1	NFIX(var.2)
41	0	1.85015	0.903	0.487	0	MG	MA1527.1	NFIC(var.2)
42	0	1.82061	0.874	0.484	0	MG	MA0867.2	SOX4
43	0	1.80612	0.911	0.48	0	MG	MA1643.1	NFIB
44	0	1.72476	0.869	0.467	0	MG	MA1120.1	SOX13
45	0	1.68847	0.848	0.453	0	MG	MA0868.2	SOX8
46	0	1.64944	0.858	0.485	0	MG	MA0515.1	Sox6
47	0	1.61493	0.844	0.456	0	MG	MA0892.1	GSX1
48	0	1.57841	0.848	0.46	0	MG	MA0027.2	EN1
49	0	1.52933	0.876	0.487	0	MG	MA0119.1	NFIC::TLX1
50	0	1.52871	0.861	0.48	0	MG	MA0514.1	Sox3
51	0	1.49102	0.833	0.46	0	MG	MA1562.1	SOX14
52	0	1.47756	0.833	0.452	0	MG	MA0890.1	GBX2
53	0	1.47724	0.847	0.476	0	MG	MA0442.2	SOX10
54	0	1.45874	0.848	0.467	0	MG	MA0143.4	SOX2
55	0	1.45613	0.834	0.463	0	MG	MA0720.1	Shox2
56	0	1.3839	0.857	0.465	0	MG	MA1549.1	POU6F1(var.2)
57	0	1.38247	0.836	0.499	0	MG	MA1563.1	SOX18
58	0	1.37143	0.818	0.461	0	MG	MA0699.1	LBX2
59	0	1.36554	0.857	0.504	0	MG	MA0161.2	NFIC
60	0	1.35527	0.85	0.488	0	MG	MA0671.1	NFIX
61	0	1.32605	0.836	0.465	0	MG	MA0793.1	POU6F2
62	0	1.32156	0.822	0.455	0	MG	MA0666.1	MSX1
63	0	1.31769	0.808	0.45	0	MG	MA0875.1	BARX1
64	0	1.30364	0.811	0.459	0	MG	MA0654.1	ISX
65	0	1.30364	0.811	0.459	0	MG	MA0716.1	PRRX1
66	0	1.30364	0.811	0.459	0	MG	MA0717.1	RAX2
67	0	1.29632	0.812	0.465	0	MG	MA0710.1	NOTO
68	0	1.29436	0.813	0.462	0	MG	MA0630.1	SHOX
69	0	1.29169	0.833	0.484	0	MG	MA0670.1	NFIA
70	0	1.28736	0.826	0.443	0	MG	MA1152.1	SOX15
71	0	1.28275	0.808	0.457	0	MG	MA0903.1	HOXB3
72	0	1.27879	0.802	0.46	0	MG	MA0077.1	SOX9
73	0	1.22972	0.796	0.468	0	MG	MA0068.2	PAX4
74	0	1.22972	0.796	0.468	0	MG	MA0705.1	Lhx8
75	0	1.22972	0.796	0.468	0	MG	MA1577.1	TLX2
76	0	1.22972	0.796	0.468	0	MG	MA0701.2	LHX9
77	0	1.22972	0.796	0.468	0	MG	MA0075.3	PRRX2
78	0	1.22513	0.797	0.464	0	MG	MA0889.1	GBX1
79	0	1.21465	0.808	0.462	0	MG	MA0644.1	ESX1
80	0	1.19441	0.784	0.465	0	MG	MA0808.1	TEAD3
81	0	1.18283	0.787	0.473	0	MG	MA1121.1	TEAD2
82	0	1.17831	0.798	0.467	0	MG	MA1476.1	DLX5
83	0	1.17193	0.795	0.461	0	MG	MA0886.1	EMX2
84	0	1.16904	0.835	0.509	0	MG	MA0739.1	Hic1
85	0	1.15988	0.793	0.446	0	MG	MA0709.1	Msx3
86	0	1.15785	0.792	0.46	0	MG	MA0725.1	VSX1
87	0	1.13978	0.798	0.467	0	MG	MA0642.1	EN2
88	0	1.13476	0.785	0.451	0	MG	MA0125.1	Nobox
89	0	1.11686	0.782	0.445	0	MG	MA1501.1	HOXB7
90	0	1.11225	0.782	0.465	0	MG	MA0618.1	LBX1
91	0	1.1028	0.767	0.469	0	MG	MA0853.1	Alx4
92	0	1.09458	0.779	0.47	0	MG	MA0854.1	Alx1
93	0	1.09301	0.781	0.472	0	MG	MA1463.1	ARGFX
94	0	1.08578	0.784	0.469	0	MG	MA0621.1	mix-a
95	0	1.07274	0.776	0.466	0	MG	MA0634.1	ALX3
96	0	1.06448	0.766	0.472	0	MG	MA0662.1	MIXL1
97	0	1.06102	0.77	0.467	0	MG	MA0658.1	LHX6
98	0	1.05309	0.763	0.467	0	MG	MA0704.1	Lhx4
99	0	1.05309	0.763	0.467	0	MG	MA0721.1	UNCX
100	0	1.04927	0.762	0.455	0	MG	MA0661.1	MEOX1
101	0	1.04215	0.761	0.46	0	MG	MA0132.2	PDX1
102	0	1.04215	0.761	0.46	0	MG	MA0612.2	EMX1
103	0	1.04215	0.761	0.46	0	MG	MA0893.2	GSX2
104	0	1.04215	0.761	0.46	0	MG	MA0900.2	HOXA2
105	0	1.04215	0.761	0.46	0	MG	MA0902.2	HOXB2
106	0	1.03527	0.784	0.451	0	MG	MA1561.1	SOX12
107	0	1.03346	0.773	0.461	0	MG	MA0674.1	NKX6-1
108	0	1.03346	0.773	0.461	0	MG	MA0675.1	NKX6-2
109	0	1.03346	0.773	0.461	0	MG	MA1519.1	LHX5
110	0	1.02495	0.759	0.472	0	MG	MA0809.2	TEAD4
111	0	1.0226	0.771	0.48	0	MG	MA0090.3	TEAD1
112	0	1.01801	0.769	0.472	0	MG	MA0894.1	HESX1
113	0	1.01426	0.768	0.458	0	MG	MA0628.1	POU6F1
114	0	1.00836	0.78	0.491	0	MG	MA0078.1	Sox17
115	0	0.994943	0.765	0.45	0	MG	MA0708.1	MSX2
116	0	0.989735	0.755	0.469	0	MG	MA0874.1	Arx
117	0	0.984613	0.768	0.452	0	MG	MA1497.1	HOXA6
118	0	0.972482	0.765	0.452	0	MG	MA0876.1	BSX
119	0	0.971994	0.758	0.452	0	MG	MA0882.1	DLX6
120	0	0.968185	0.771	0.467	0	MG	MA1518.1	LHX1
121	0	0.964529	0.748	0.463	0	MG	MA0726.1	VSX2
122	0	0.957907	0.747	0.449	0	MG	MA0722.1	VAX1
123	0	0.957907	0.747	0.449	0	MG	MA0723.1	VAX2
124	0	0.957907	0.747	0.449	0	MG	MA1481.1	DRGX
125	0	0.947846	0.76	0.463	0	MG	MA0707.1	MNX1
126	0	0.933206	0.75	0.468	0	MG	MA0718.1	RAX
127	0	0.906957	0.757	0.475	0	MG	MA0523.1	TCF7L2
128	0	0.904506	0.744	0.467	0	MG	MA0912.2	HOXD3
129	0	0.875571	0.754	0.463	0	MG	MA1530.1	NKX6-3
130	0	0.85989	0.728	0.465	0	MG	MA0888.1	EVX2
131	0	0.852496	0.747	0.463	0	MG	MA0879.1	Dlx1
132	0	0.847754	0.736	0.453	0	MG	MA1495.1	HOXA1
133	0	0.847754	0.736	0.453	0	MG	MA0904.2	HOXB5
134	0	0.838686	0.737	0.459	0	MG	MA0706.1	MEOX2
135	0	0.832678	0.72	0.455	0	MG	MA0655.1	JDP2
136	0	0.802779	0.74	0.449	0	MG	MA1534.1	NR1I3
137	0	0.802461	0.733	0.492	0	MG	MA1632.1	ATF2
138	0	0.792434	0.734	0.5	0	MG	MA0488.1	JUN
139	0	0.790104	0.718	0.466	0	MG	MA0887.1	EVX1
140	0	0.774727	0.721	0.469	0	MG	MA0769.2	TCF7
141	0	0.774007	0.738	0.49	0	MG	MA0492.1	JUND(var.2)
142	0	0.772566	0.764	0.509	0	MG	MA0730.1	RARA(var.2)
143	0	0.768751	0.726	0.461	0	MG	MA0158.2	HOXA5
144	0	0.763408	0.711	0.459	0	MG	MA0700.2	LHX2
145	0	0.763347	0.757	0.494	0	MG	MA0744.2	SCRT2
146	0	0.761763	0.717	0.461	0	MG	MA0880.1	Dlx3
147	0	0.74075	0.747	0.499	0	MG	MA0743.2	SCRT1
148	0	0.73863	0.724	0.466	0	MG	MA0087.1	Sox5
149	9.49247e-305	0.724429	0.707	0.458	7.08138e-302	MG	MA0881.1	Dlx4
150	3.03845e-300	0.800607	0.72	0.466	2.26668e-297	MG	MA0703.2	LMX1B
151	4.43784e-298	0.77248	0.694	0.448	3.31063e-295	MG	MA1138.1	FOSL2::JUNB
152	6.58708e-295	0.78672	0.696	0.453	4.91396e-292	MG	MA1144.1	FOSL2::JUND
153	3.69223e-294	0.72783	0.744	0.506	2.7544e-291	MG	MA0007.3	Ar
154	8.62392e-294	0.714324	0.702	0.453	6.43344e-291	MG	MA0896.1	Hmx1
155	7.29079e-287	0.674724	0.759	0.515	5.43893e-284	MG	MA0738.1	HIC2
156	6.55588e-286	0.651108	0.719	0.481	4.89069e-283	MG	MA0593.1	FOXP2
157	2.11023e-280	0.609214	0.697	0.462	1.57423e-277	MG	MA0040.1	Foxq1
158	5.96963e-279	0.744168	0.698	0.459	4.45335e-276	MG	MA0885.1	Dlx2
159	3.75404e-275	0.742162	0.687	0.454	2.80051e-272	MG	MA1142.1	FOSL1::JUND
160	4.61956e-275	0.670484	0.741	0.509	3.44619e-272	MG	MA1149.1	RARA::RXRG
161	1.62929e-270	0.698593	0.741	0.504	1.21545e-267	MG	MA0858.1	Rarb(var.2)
162	3.27655e-269	0.674476	0.707	0.474	2.44431e-266	MG	MA0768.1	LEF1
163	8.30049e-269	0.731535	0.764	0.516	6.19217e-266	MG	MA0002.2	RUNX1
164	4.24065e-267	0.697513	0.683	0.445	3.16353e-264	MG	MA1500.1	HOXB6
165	1.69052e-266	0.756142	0.688	0.457	1.26113e-263	MG	MA1130.1	FOSL2::JUN
166	4.54211e-265	0.584901	0.747	0.513	3.38842e-262	MG	MA1656.1	ZNF449
167	1.74166e-257	0.623199	0.722	0.489	1.29928e-254	MG	MA1487.1	FOXE1
168	9.19897e-257	0.620876	0.754	0.521	6.86244e-254	MG	MA1548.1	PLAGL2
169	2.91767e-256	0.729838	0.689	0.464	2.17658e-253	MG	MA0489.1	JUN(var.2)
170	1.1417e-254	0.765739	0.728	0.487	8.51708e-252	MG	MA1150.1	RORB
171	3.84715e-252	0.722953	0.685	0.458	2.86997e-249	MG	MA1141.1	FOS::JUND
172	1.51871e-251	0.709676	0.687	0.456	1.13296e-248	MG	MA0702.2	LMX1A
173	2.73319e-249	0.665658	0.683	0.455	2.03896e-246	MG	MA1502.1	HOXB8
174	6.3287e-249	0.723108	0.68	0.46	4.72121e-246	MG	MA0099.3	FOS::JUN
175	2.58167e-248	0.723542	0.737	0.508	1.92592e-245	MG	MA1124.1	ZNF24
176	3.24858e-248	0.661531	0.755	0.524	2.42344e-245	MG	MA1654.1	ZNF16
177	6.01766e-248	0.709268	0.713	0.483	4.48918e-245	MG	MA1151.1	RORC
178	3.74018e-246	0.696845	0.719	0.483	2.79018e-243	MG	MA0142.1	Pou5f1::Sox2
179	9.41968e-242	0.696031	0.675	0.456	7.02708e-239	MG	MA1134.1	FOS::JUNB
180	2.14067e-241	0.606145	0.724	0.495	1.59694e-238	MG	MA0114.4	HNF4A
181	7.07379e-241	0.716268	0.687	0.472	5.27705e-238	MG	MA0841.1	NFE2
182	1.53016e-240	0.455902	0.732	0.505	1.1415e-237	MG	MA1615.1	Plagl1
183	1.94822e-240	0.68114	0.671	0.451	1.45337e-237	MG	MA1137.1	FOSL1::JUNB
184	7.65567e-233	0.67959	0.675	0.461	5.71113e-230	MG	MA1132.1	JUN::JUNB
185	1.89511e-230	0.689732	0.674	0.458	1.41375e-227	MG	MA1128.1	FOSL1::JUN
186	3.0355e-229	0.597175	0.722	0.499	2.26448e-226	MG	MA0484.2	HNF4G
187	2.04617e-226	0.674974	0.67	0.461	1.52644e-223	MG	MA1135.1	FOSB::JUNB
188	1.6858e-225	0.667855	0.676	0.46	1.25761e-222	MG	MA0477.2	FOSL1
189	8.5038e-223	0.59489	0.711	0.494	6.34384e-220	MG	MA0137.3	STAT1
190	3.31673e-220	0.596286	0.658	0.453	2.47428e-217	MG	MA1505.1	HOXC8
191	8.07418e-220	0.635602	0.66	0.455	6.02334e-217	MG	MA0491.2	JUND
192	1.17213e-217	0.603835	0.716	0.51	8.74407e-215	MG	MA1579.1	ZBTB26
193	6.2122e-217	0.526324	0.675	0.471	4.6343e-214	MG	MA1606.1	Foxf1
194	2.31971e-215	0.625076	0.669	0.458	1.7305e-212	MG	MA0490.2	JUNB
195	1.1363e-212	0.49403	0.659	0.459	8.47683e-210	MG	MA0614.1	Foxj2
196	7.48782e-212	0.511168	0.666	0.468	5.58591e-209	MG	MA0030.1	FOXF2
197	1.69778e-209	0.672832	0.68	0.471	1.26655e-206	MG	MA0478.1	FOSL2
198	2.16539e-208	0.591016	0.697	0.492	1.61538e-205	MG	MA0870.1	Sox1
199	1.52599e-205	0.566148	0.733	0.512	1.13839e-202	MG	MA1116.1	RBPJ
200	4.46542e-205	0.564611	0.708	0.499	3.3312e-202	MG	MA1624.1	Stat5a
201	8.30863e-204	0.609611	0.711	0.507	6.19824e-201	MG	MA1592.1	ZNF274
202	1.24342e-200	0.58972	0.736	0.513	9.27593e-198	MG	MA0597.1	THAP1
203	1.60896e-196	0.548184	0.679	0.478	1.20028e-193	MG	MA0869.1	Sox11
204	2.28807e-193	0.573132	0.723	0.51	1.7069e-190	MG	MA0144.2	STAT3
205	4.04611e-193	0.553449	0.692	0.503	3.0184e-190	MG	MA0727.1	NR3C2
206	6.64917e-192	0.60059	0.658	0.468	4.96028e-189	MG	MA1101.2	BACH2
207	1.39213e-190	0.549007	0.694	0.488	1.03853e-187	MG	MA0520.1	Stat6
208	2.51861e-189	0.528782	0.663	0.465	1.87888e-186	MG	MA0601.1	Arid3b
209	7.21304e-187	0.513869	0.726	0.513	5.38093e-184	MG	MA0138.2	REST
210	1.10802e-186	0.610349	0.732	0.529	8.26582e-184	MG	MA1600.1	ZNF684
211	1.90967e-184	0.47549	0.663	0.476	1.42462e-181	MG	MA1103.2	FOXK2
212	7.71263e-182	0.513897	0.675	0.496	5.75362e-179	MG	MA0693.2	VDR
213	1.97345e-180	0.544911	0.691	0.505	1.47219e-177	MG	MA0113.3	NR3C1
214	1.46956e-179	0.473164	0.72	0.514	1.09629e-176	MG	MA0764.2	ETV4
215	3.12379e-179	0.470049	0.643	0.452	2.33035e-176	MG	MA0084.1	SRY
216	2.40306e-177	0.552138	0.692	0.499	1.79268e-174	MG	MA0486.2	HSF1
217	5.13755e-176	0.490706	0.669	0.488	3.83261e-173	MG	MA0684.2	RUNX3
218	5.49081e-175	0.421745	0.659	0.471	4.09615e-172	MG	MA0517.1	STAT1::STAT2
219	6.34722e-175	0.511741	0.705	0.51	4.73503e-172	MG	MA1649.1	ZBTB12
220	2.80195e-174	0.465704	0.665	0.477	2.09025e-171	MG	MA0852.2	FOXK1
221	1.32392e-172	0.544623	0.684	0.497	9.87642e-170	MG	MA1608.1	Isl1
222	1.27327e-166	0.568779	0.645	0.461	9.49861e-164	MG	MA0476.1	FOS
223	9.02978e-166	0.51337	0.695	0.504	6.73621e-163	MG	MA0519.1	Stat5a::Stat5b
224	1.10076e-165	0.498891	0.66	0.484	8.21164e-163	MG	MA0866.1	SOX21
225	2.4355e-162	0.490743	0.689	0.508	1.81689e-159	MG	MA0159.1	RARA::RXRA
226	2.81295e-162	0.490351	0.716	0.51	2.09846e-159	MG	MA1628.1	Zic1::Zic2
227	3.14608e-162	0.453078	0.655	0.481	2.34698e-159	MG	MA1420.1	IRF5
228	1.10485e-161	0.560151	0.679	0.491	8.24219e-159	MG	MA0089.2	NFE2L1
229	2.01079e-161	0.543546	0.723	0.515	1.50005e-158	MG	MA1646.1	OSR2
230	3.96324e-161	0.478489	0.673	0.502	2.95658e-158	MG	MA0795.1	SMAD3
231	5.16046e-157	0.463129	0.702	0.509	3.84971e-154	MG	MA0761.2	ETV1
232	1.12351e-155	0.553823	0.673	0.491	8.38137e-153	MG	MA0018.4	CREB1
233	2.33268e-155	0.555842	0.646	0.473	1.74018e-152	MG	MA1622.1	Smad2::Smad3
234	1.0602e-154	0.525164	0.689	0.498	7.90906e-152	MG	MA1520.1	MAF
235	2.30008e-153	0.514397	0.682	0.511	1.71586e-150	MG	MA0646.1	GCM1
236	4.55817e-151	0.551768	0.693	0.504	3.4004e-148	MG	MA0150.2	Nfe2l2
237	8.87296e-151	0.476142	0.655	0.484	6.61923e-148	MG	MA1421.1	TCF7L1
238	9.08104e-148	0.512151	0.693	0.502	6.77446e-145	MG	MA1521.1	MAFA
239	2.55553e-147	0.451805	0.693	0.508	1.90642e-144	MG	MA1601.1	ZNF75D
240	5.71246e-147	0.475569	0.635	0.476	4.26149e-144	MG	MA1126.1	FOS::JUN(var.2)
241	1.24448e-145	0.433359	0.696	0.51	9.2838e-143	MG	MA0640.2	ELF3
242	3.32683e-145	0.487717	0.651	0.48	2.48181e-142	MG	MA1507.1	HOXD4
243	1.00299e-144	0.412478	0.627	0.461	7.48234e-142	MG	MA0653.1	IRF9
244	1.82392e-144	0.472589	0.686	0.503	1.36065e-141	MG	MA0518.1	Stat4
245	4.1336e-144	0.397083	0.672	0.499	3.08366e-141	MG	MA0522.3	TCF3
246	6.39127e-144	0.46988	0.68	0.508	4.76789e-141	MG	MA1154.1	ZNF282
247	6.56714e-144	0.568993	0.709	0.515	4.89908e-141	MG	MA1108.2	MXI1
248	1.0189e-143	0.478172	0.707	0.516	7.60101e-141	MG	MA1629.1	Zic2
249	1.72493e-143	0.499666	0.635	0.463	1.28679e-140	MG	MA0462.2	BATF::JUN
250	2.24935e-143	0.415971	0.64	0.479	1.67801e-140	MG	MA0042.2	FOXI1
251	2.24935e-143	0.415971	0.64	0.479	1.67801e-140	MG	MA0033.2	FOXL1
252	2.24935e-143	0.415971	0.64	0.479	1.67801e-140	MG	MA0848.1	FOXO4
253	2.24935e-143	0.415971	0.64	0.479	1.67801e-140	MG	MA0849.1	FOXO6
254	2.24935e-143	0.415971	0.64	0.479	1.67801e-140	MG	MA0850.1	FOXP3
255	6.45693e-143	0.473962	0.696	0.514	4.81687e-140	MG	MA1523.1	MSANTD3
256	1.66552e-142	0.499758	0.632	0.465	1.24248e-139	MG	MA0835.2	BATF3
257	2.15621e-142	0.539449	0.71	0.528	1.60853e-139	MG	MA0066.1	PPARG
258	4.5396e-142	0.456413	0.665	0.494	3.38654e-139	MG	MA0802.1	TBR1
259	7.83442e-142	0.506558	0.683	0.508	5.84448e-139	MG	MA1625.1	Stat5b
260	1.16886e-140	0.433794	0.634	0.465	8.7197e-138	MG	MA0792.1	POU5F1B
261	1.78524e-138	0.38801	0.669	0.498	1.33179e-135	MG	MA1648.1	TCF12(var.2)
262	4.92507e-138	0.472587	0.684	0.511	3.6741e-135	MG	MA0092.1	Hand1::Tcf3
263	1.39313e-137	0.461907	0.631	0.482	1.03927e-134	MG	MA1133.1	JUN::JUNB(var.2)
264	8.49761e-137	0.450714	0.672	0.504	6.33922e-134	MG	MA1602.1	ZSCAN29
265	9.77362e-137	0.415533	0.629	0.468	7.29112e-134	MG	MA0724.1	VENTX
266	7.9907e-136	0.427751	0.694	0.51	5.96107e-133	MG	MA0062.3	GABPA
267	5.36822e-135	0.436926	0.7	0.523	4.00469e-132	MG	MA0734.2	GLI2
268	4.06137e-134	0.475604	0.684	0.513	3.02978e-131	MG	MA0596.1	SREBF2
269	1.60378e-132	0.453271	0.668	0.507	1.19642e-129	MG	MA1146.1	NR1H4::RXRA
270	5.94502e-132	0.475831	0.665	0.494	4.43498e-129	MG	MA0501.1	MAF::NFE2
271	1.62247e-131	0.476322	0.628	0.465	1.21036e-128	MG	MA1634.1	BATF
272	2.16779e-130	0.417184	0.62	0.461	1.61717e-127	MG	MA0897.1	Hmx2
273	3.27104e-130	0.525046	0.688	0.513	2.4402e-127	MG	MA0106.3	TP53
274	1.42566e-128	0.441909	0.69	0.524	1.06354e-125	MG	MA1491.1	GLI3
275	3.34571e-128	0.413389	0.651	0.502	2.4959e-125	MG	MA1557.1	SMAD5
276	3.608e-127	0.341207	0.683	0.518	2.69157e-124	MG	MA1599.1	ZNF682
277	1.43572e-126	0.452142	0.697	0.528	1.07105e-123	MG	MA0116.1	Znf423
278	7.4994e-126	0.450379	0.643	0.486	5.59455e-123	MG	MA1496.1	HOXA4
279	8.9917e-126	0.38047	0.622	0.472	6.70781e-123	MG	MA0043.3	HLF
280	6.69172e-123	0.495125	0.687	0.509	4.99202e-120	MG	MA0591.1	Bach1::Mafk
281	2.26812e-121	0.410398	0.66	0.501	1.69201e-118	MG	MA0074.1	RXRA::VDR
282	5.10968e-121	0.444602	0.63	0.482	3.81182e-118	MG	MA1499.1	HOXB4
283	1.12197e-120	0.35448	0.66	0.493	8.36987e-118	MG	MA1631.1	ASCL1(var.2)
284	4.70161e-119	0.401789	0.62	0.463	3.5074e-116	MG	MA0898.1	Hmx3
285	5.02175e-119	0.374361	0.631	0.48	3.74623e-116	MG	MA0481.3	FOXP1
286	5.73733e-118	0.464308	0.679	0.518	4.28005e-115	MG	MA0626.1	Npas2
287	1.068e-117	0.411748	0.649	0.495	7.96728e-115	MG	MA0673.1	NKX2-8
288	4.95766e-117	0.406114	0.634	0.479	3.69841e-114	MG	MA0836.2	CEBPD
289	6.62766e-117	0.362012	0.62	0.477	4.94423e-114	MG	MA0837.1	CEBPE
290	8.70222e-116	0.371357	0.614	0.463	6.49185e-113	MG	MA1419.1	IRF4
291	3.79152e-114	0.418607	0.651	0.501	2.82848e-111	MG	MA0164.1	Nr2e3
292	4.98025e-114	0.432403	0.652	0.495	3.71527e-111	MG	MA0842.2	NRL
293	6.58443e-114	0.373104	0.615	0.461	4.91199e-111	MG	MA0652.1	IRF8
294	9.0316e-114	0.401357	0.618	0.471	6.73757e-111	MG	MA1504.1	HOXC4
295	3.58275e-113	0.439734	0.674	0.52	2.67273e-110	MG	MA1153.1	Smad4
296	1.28011e-112	0.365961	0.618	0.474	9.54966e-110	MG	MA0031.1	FOXD1
297	1.28011e-112	0.365961	0.618	0.474	9.54966e-110	MG	MA0157.2	FOXO3
298	9.08215e-112	0.415056	0.635	0.486	6.77528e-109	MG	MA0072.1	RORA(var.2)
299	1.09646e-111	0.416309	0.616	0.479	8.1796e-109	MG	MA1145.1	FOSL2::JUND(var.2)
300	1.16928e-111	0.38572	0.62	0.475	8.72281e-109	MG	MA0907.1	HOXC13
301	4.50627e-111	0.404308	0.612	0.476	3.36167e-108	MG	MA1127.1	FOSB::JUN
302	3.35639e-110	0.448644	0.693	0.524	2.50387e-107	MG	MA0258.2	ESR2
303	4.62682e-110	0.474842	0.661	0.498	3.4516e-107	MG	MA1633.1	BACH1
304	5.22971e-110	0.390621	0.652	0.506	3.90137e-107	MG	MA1585.1	ZKSCAN1
305	1.0197e-109	0.396833	0.614	0.475	7.60693e-107	MG	MA0656.1	JDP2(var.2)
306	1.32464e-109	0.349543	0.615	0.477	9.88182e-107	MG	MA0466.2	CEBPB
307	1.61965e-109	0.393926	0.657	0.511	1.20826e-106	MG	MA1589.1	ZNF140
308	6.68916e-109	0.545667	0.7	0.521	4.99011e-106	MG	MA1155.1	ZSCAN4
309	3.2178e-107	0.433907	0.651	0.502	2.40048e-104	MG	MA0771.1	HSF4
310	9.10314e-107	0.408242	0.643	0.494	6.79094e-104	MG	MA0117.2	Mafb
311	4.29973e-106	0.409405	0.665	0.514	3.2076e-103	MG	MA0503.1	Nkx2-5(var.2)
312	6.79467e-105	0.423607	0.666	0.515	5.06882e-102	MG	MA1535.1	NR2C1
313	1.73608e-104	0.311089	0.649	0.491	1.29511e-101	MG	MA1623.1	Stat2
314	1.99622e-104	0.354205	0.66	0.514	1.48918e-101	MG	MA1559.1	SNAI3
315	4.34248e-104	0.378327	0.67	0.516	3.23949e-101	MG	MA0088.2	ZNF143
316	4.50866e-104	0.388932	0.649	0.499	3.36346e-101	MG	MA0480.1	Foxo1
317	5.64808e-104	0.416295	0.671	0.52	4.21347e-101	MG	MA1575.1	THRB(var.2)
318	2.223e-103	0.335985	0.617	0.474	1.65836e-100	MG	MA1607.1	Foxl2
319	7.8633e-103	0.404757	0.694	0.518	5.86602e-100	MG	MA0154.4	EBF1
320	8.70757e-103	0.375406	0.649	0.495	6.49585e-100	MG	MA0800.1	EOMES
321	1.72513e-102	0.344077	0.655	0.511	1.28695e-99	MG	MA1558.1	SNAI1
322	2.74852e-101	0.396882	0.655	0.505	2.0504e-98	MG	MA0107.1	RELA
323	3.33409e-101	0.369902	0.632	0.491	2.48723e-98	MG	MA1119.1	SIX2
324	6.9509e-101	0.382864	0.608	0.477	5.18537e-98	MG	MA1131.1	FOSL2::JUN(var.2)
325	2.72046e-100	0.344223	0.627	0.483	2.02946e-97	MG	MA1683.1	FOXA3
326	3.59522e-99	0.416281	0.665	0.512	2.68203e-96	MG	MA0863.1	MTF1
327	5.34703e-98	0.39492	0.651	0.505	3.98888e-95	MG	MA0101.1	REL
328	5.57843e-97	0.49403	0.682	0.513	4.16151e-94	MG	MA1635.1	BHLHE22(var.2)
329	3.35496e-96	0.393665	0.64	0.496	2.5028e-93	MG	MA0770.1	HSF2
330	4.60146e-96	0.351634	0.612	0.469	3.43269e-93	MG	MA0787.1	POU3F2
331	4.65556e-96	0.379311	0.656	0.516	3.47305e-93	MG	MA0801.1	MGA
332	4.65556e-96	0.379311	0.656	0.516	3.47305e-93	MG	MA0803.1	TBX15
333	1.93311e-95	0.383494	0.656	0.515	1.4421e-92	MG	MA1645.1	NKX2-2
334	5.97835e-94	0.358569	0.633	0.503	4.45985e-91	MG	MA1553.1	RARG(var.3)
335	7.58775e-94	0.360629	0.635	0.5	5.66046e-91	MG	MA1542.1	OSR1
336	1.40424e-93	0.365569	0.625	0.495	1.04756e-90	MG	MA0511.2	RUNX2
337	2.14469e-93	0.419192	0.675	0.521	1.59994e-90	MG	MA1655.1	ZNF341
338	5.04947e-93	0.30243	0.642	0.499	3.7669e-90	MG	MA0830.2	TCF4
339	8.17013e-92	0.411713	0.645	0.508	6.09492e-89	MG	MA1110.1	NR1H4
340	1.48933e-91	0.382392	0.644	0.497	1.11104e-88	MG	MA0659.2	MAFG
341	2.11487e-91	0.310251	0.602	0.473	1.57769e-88	MG	MA0847.2	FOXD2
342	2.44178e-91	0.315655	0.596	0.456	1.82157e-88	MG	MA0772.1	IRF7
343	1.61163e-90	0.373966	0.649	0.504	1.20228e-87	MG	MA0508.3	PRDM1
344	3.95375e-89	0.327768	0.654	0.512	2.9495e-86	MG	MA0081.2	SPIB
345	4.50166e-88	0.288932	0.604	0.471	3.35824e-85	MG	MA0851.1	Foxj3
346	9.55971e-88	0.378961	0.665	0.524	7.13155e-85	MG	MA0737.1	GLIS3
347	5.87153e-86	0.342229	0.659	0.517	4.38016e-83	MG	MA0065.2	Pparg::Rxra
348	5.59925e-85	0.292179	0.639	0.514	4.17704e-82	MG	MA1573.1	THAP11
349	5.81766e-85	0.323152	0.588	0.466	4.33997e-82	MG	MA0789.1	POU3F4
350	6.16865e-85	0.354292	0.635	0.504	4.60182e-82	MG	MA0100.3	MYB
351	8.31729e-85	0.320421	0.663	0.513	6.2047e-82	MG	MA0473.3	ELF1
352	2.14159e-83	0.398814	0.659	0.502	1.59762e-80	MG	MA0048.2	NHLH1
353	1.692e-82	0.323693	0.658	0.509	1.26223e-79	MG	MA1508.1	IKZF1
354	2.18076e-82	0.327123	0.598	0.474	1.62685e-79	MG	MA0913.2	HOXD9
355	2.88485e-82	0.355886	0.654	0.513	2.1521e-79	MG	MA1597.1	ZNF528
356	4.91911e-82	0.335981	0.626	0.502	3.66966e-79	MG	MA0839.1	CREB3L1
357	6.85081e-82	0.293333	0.631	0.501	5.11071e-79	MG	MA0696.1	ZIC1
358	2.95266e-81	0.324469	0.633	0.499	2.20268e-78	MG	MA0688.1	TBX2
359	7.48856e-80	0.333261	0.611	0.49	5.58646e-77	MG	MA0804.1	TBX19
360	3.17736e-79	0.328595	0.64	0.501	2.37031e-76	MG	MA0689.1	TBX20
361	2.64763e-77	0.331472	0.625	0.506	1.97513e-74	MG	MA0805.1	TBX1
362	3.01549e-77	0.326508	0.584	0.47	2.24956e-74	MG	MA1136.1	FOSB::JUNB(var.2)
363	1.86811e-75	0.309871	0.657	0.511	1.39361e-72	MG	MA1114.1	PBX3
364	6.36917e-74	0.320464	0.611	0.493	4.7514e-71	MG	MA0463.2	BCL6
365	9.4179e-74	0.300741	0.584	0.473	7.02575e-71	MG	MA1498.1	HOXA7
366	9.4179e-74	0.300741	0.584	0.473	7.02575e-71	MG	MA0910.2	HOXD8
367	1.15816e-73	0.30444	0.629	0.5	8.63987e-71	MG	MA1541.1	NR6A1
368	7.03626e-72	0.307956	0.586	0.475	5.24905e-69	MG	MA0605.2	ATF3
369	7.7445e-71	0.297951	0.607	0.492	5.77739e-68	MG	MA0844.1	XBP1
370	3.25148e-68	0.299981	0.641	0.514	2.4256e-65	MG	MA0807.1	TBX5
371	3.74236e-66	0.311022	0.615	0.505	2.7918e-63	MG	MA0767.1	GCM2
372	4.02717e-66	0.296051	0.607	0.495	3.00427e-63	MG	MA0525.2	TP63
373	8.17378e-66	0.267883	0.637	0.512	6.09764e-63	MG	MA0080.5	SPI1
374	1.37502e-64	0.282765	0.636	0.52	1.02577e-61	MG	MA0745.2	SNAI2
375	1.53783e-64	0.348302	0.626	0.511	1.14722e-61	MG	MA1117.1	RELB
376	2.3809e-64	0.278721	0.619	0.504	1.77615e-61	MG	MA1533.1	NR1I2
377	5.83108e-64	0.298834	0.653	0.52	4.34998e-61	MG	MA1637.1	EBF3
378	4.29874e-63	0.30035	0.643	0.519	3.20686e-60	MG	MA0513.1	SMAD2::SMAD3::SMAD4
379	1.02495e-62	0.274248	0.635	0.52	7.64616e-60	MG	MA1621.1	Rbpjl
380	7.46219e-62	0.283634	0.62	0.505	5.56679e-59	MG	MA0063.2	NKX2-5
381	1.64472e-61	0.277367	0.574	0.47	1.22696e-58	MG	MA0780.1	PAX3
382	1.10167e-60	0.296789	0.651	0.52	8.21846e-58	MG	MA1604.1	Ebf2
383	1.48263e-60	0.325216	0.617	0.499	1.10605e-57	MG	MA1525.1	NFATC4
384	3.30013e-60	0.297136	0.634	0.518	2.4619e-57	MG	MA0595.1	SREBF1
385	9.95278e-60	0.283204	0.613	0.497	7.42477e-57	MG	MA0731.1	BCL6B
386	3.09529e-59	0.289569	0.619	0.503	2.30909e-56	MG	MA0819.1	CLOCK
387	4.81082e-59	0.26847	0.584	0.473	3.58887e-56	MG	MA0784.1	POU1F1
388	8.05597e-59	0.291339	0.635	0.524	6.00975e-56	MG	MA0860.1	Rarg(var.2)
389	2.24147e-58	0.303281	0.652	0.532	1.67213e-55	MG	MA0155.1	INSM1
390	4.04166e-58	0.280341	0.612	0.504	3.01508e-55	MG	MA0690.1	TBX21
391	2.68267e-57	0.281025	0.625	0.515	2.00127e-54	MG	MA1566.1	TBX3
392	1.56555e-56	0.260409	0.576	0.473	1.1679e-53	MG	MA0899.1	HOXA10
393	2.91167e-56	0.271667	0.572	0.47	2.17211e-53	MG	MA1139.1	FOSL2::JUNB(var.2)
394	4.01126e-56	0.263212	0.579	0.474	2.9924e-53	MG	MA0914.1	ISL2
395	2.40546e-55	0.26788	0.605	0.508	1.79447e-52	MG	MA1552.1	RARB(var.3)
396	5.56125e-55	0.291183	0.621	0.516	4.14869e-52	MG	MA1594.1	ZNF382
397	2.10645e-54	0.255897	0.63	0.52	1.57141e-51	MG	MA1620.1	Ptf1a(var.3)
398	3.73481e-54	0.294087	0.618	0.493	2.78617e-51	MG	MA1100.2	ASCL1
399	5.67166e-53	0.284312	0.618	0.507	4.23106e-50	MG	MA0622.1	Mlxip
400	1.49867e-52	0.275666	0.598	0.492	1.11801e-49	MG	MA0495.3	MAFF
401	2.42216e-52	0.269467	0.604	0.501	1.80693e-49	MG	MA0009.2	TBXT
402	3.04691e-52	0.25567	0.587	0.478	2.27299e-49	MG	MA1115.1	POU5F1
403	3.40421e-52	0.271917	0.623	0.514	2.53954e-49	MG	MA1567.1	TBX6
404	4.30107e-51	0.259612	0.609	0.51	3.2086e-48	MG	MA1493.1	HES6
405	1.61972e-50	0.255949	0.592	0.496	1.20831e-47	MG	MA0479.1	FOXH1
406	1.09508e-49	0.25497	0.586	0.485	8.1693e-47	MG	MA0609.2	CREM
407	1.3409e-49	0.263083	0.621	0.515	1.00031e-46	MG	MA0059.1	MAX::MYC
408	2.49508e-48	0.25018	0.62	0.52	1.86133e-45	MG	MA1531.1	NR1D1
409	1.1329e-47	0.30322	0.64	0.512	8.45143e-45	MG	MA1593.1	ZNF317
410	1.14122e-47	0.253074	0.624	0.514	8.5135e-45	MG	MA0825.1	MNT
411	2.51361e-43	0.298554	0.626	0.519	1.87515e-40	MG	MA1647.1	PRDM4
412	4.70039e-40	0.252275	0.62	0.526	3.50649e-37	MG	MA1576.1	THRB(var.3)
413	0	4.32096	0.981	0.377	0	T3	MA0467.1	Crx
414	0	4.11107	0.983	0.381	0	T3	MA0712.2	OTX2
415	0	4.08551	0.977	0.384	0	T3	MA0891.1	GSC2
416	0	4.04922	0.979	0.39	0	T3	MA0648.1	GSC
417	0	3.82273	0.977	0.388	0	T3	MA0714.1	PITX3
418	0	3.71573	0.98	0.392	0	T3	MA1547.1	PITX2
419	0	3.5462	0.977	0.394	0	T3	MA0682.2	PITX1
420	0	3.44833	0.968	0.377	0	T3	MA0883.1	Dmbx1
421	0	3.32135	0.967	0.388	0	T3	MA1480.1	DPRX
422	0	3.09798	0.959	0.394	0	T3	MA0719.1	RHOXF1
423	0	2.90094	0.922	0.392	0	T3	MA1109.1	NEUROD1
424	0	2.86705	0.916	0.394	0	T3	MA1642.1	NEUROG2(var.2)
425	0	2.15164	0.886	0.408	0	T3	MA1638.1	HAND2
426	0	2.12183	0.885	0.41	0	T3	MA0091.1	TAL1::TCF3
427	0	1.69643	0.872	0.434	0	T3	MA1468.1	ATOH7
428	0	1.57113	0.875	0.44	0	T3	MA1568.1	TCF21(var.2)
429	0	1.48066	0.86	0.447	0	T3	MA0035.4	GATA1
430	0	1.41631	0.838	0.44	0	T3	MA0669.1	NEUROG2
431	0	1.34441	0.854	0.448	0	T3	MA0668.1	NEUROD2
432	0	1.28022	0.82	0.423	0	T3	MA0711.1	OTX1
433	0	1.20728	0.816	0.454	0	T3	MA0623.2	NEUROG1
434	0	1.18584	0.818	0.445	0	T3	MA0461.2	Atoh1
435	0	1.14093	0.803	0.451	0	T3	MA0826.1	OLIG1
436	0	1.12604	0.808	0.45	0	T3	MA0818.1	BHLHE22
437	0	1.05723	0.795	0.449	0	T3	MA0678.1	OLIG2
438	1.91554e-287	0.995111	0.784	0.449	1.429e-284	T3	MA0827.1	OLIG3
439	6.89513e-283	0.992244	0.771	0.455	5.14377e-280	T3	MA0817.1	BHLHE23
440	1.14398e-277	0.913121	0.759	0.47	8.53409e-275	T3	MA0884.1	DUXA
441	2.15167e-233	0.834649	0.754	0.459	1.60515e-230	T3	MA1570.1	TFAP4(var.2)
442	3.64481e-228	1.07655	0.761	0.436	2.71903e-225	T3	MA1618.1	Ptf1a
443	5.97016e-224	0.603558	0.749	0.482	4.45374e-221	T3	MA1587.1	ZNF135
444	4.51603e-222	0.814581	0.767	0.504	3.36896e-219	T3	MA0056.2	MZF1
445	1.10139e-203	0.757344	0.713	0.468	8.21636e-201	T3	MA0468.1	DUX4
446	7.92679e-166	0.847468	0.736	0.453	5.91339e-163	T3	MA1123.2	TWIST1
447	8.43043e-154	0.727947	0.712	0.469	6.2891e-151	T3	MA0607.1	Bhlha15
448	1.58025e-146	0.693581	0.672	0.462	1.17887e-143	T3	MA0713.1	PHOX2A
449	4.49439e-145	0.620522	0.736	0.508	3.35281e-142	T3	MA0820.1	FIGLA
450	2.93446e-137	0.672888	0.717	0.479	2.18911e-134	T3	MA0633.1	Twist2
451	7.40574e-128	0.651873	0.717	0.467	5.52468e-125	T3	MA1485.1	FERD3L
452	2.28739e-123	0.530958	0.705	0.503	1.70639e-120	T3	MA0728.1	Nr2f6(var.2)
453	5.61568e-122	0.546246	0.71	0.507	4.1893e-119	T3	MA0859.1	Rarg
454	1.47064e-113	0.272869	0.659	0.472	1.0971e-110	T3	MA1596.1	ZNF460
455	3.09604e-112	0.524518	0.686	0.497	2.30965e-109	T3	MA0036.3	GATA2
456	7.65661e-101	0.411771	0.713	0.518	5.71183e-98	T3	MA1581.1	ZBTB6
457	2.06848e-95	0.648373	0.691	0.462	1.54308e-92	T3	MA1472.1	BHLHA15(var.2)
458	2.25649e-91	0.440008	0.689	0.507	1.68334e-88	T3	MA0857.1	Rarb
459	9.32514e-88	0.592492	0.672	0.461	6.95655e-85	T3	MA1467.1	ATOH1(var.2)
460	4.17549e-79	0.52025	0.671	0.469	3.11492e-76	T3	MA0832.1	Tcf21
461	3.19784e-68	0.421111	0.66	0.483	2.38559e-65	T3	MA1524.1	MSGN1
462	1.20965e-66	0.366334	0.629	0.483	9.02399e-64	T3	MA0660.1	MEF2B
463	2.80171e-56	0.417457	0.663	0.516	2.09008e-53	T3	MA0743.2	SCRT1
464	2.37164e-55	0.340935	0.656	0.513	1.76924e-52	T3	MA0017.2	NR2F1
465	4.91188e-51	0.341862	0.627	0.493	3.66426e-48	T3	MA0829.2	SREBF1(var.2)
466	6.21973e-48	0.410588	0.648	0.482	4.63992e-45	T3	MA1641.1	MYF5
467	3.56349e-43	0.412215	0.595	0.473	2.65836e-40	T3	MA0702.2	LMX1A
468	4.5263e-43	0.35628	0.643	0.514	3.37662e-40	T3	MA0744.2	SCRT2
469	5.76e-42	0.296528	0.634	0.511	4.29696e-39	T3	MA0729.1	RARA
470	1.39899e-40	0.289748	0.659	0.525	1.04364e-37	T3	MA0745.2	SNAI2
471	1.38736e-36	0.284634	0.639	0.511	1.03497e-33	T3	MA0805.1	TBX1
472	7.99541e-36	0.302031	0.572	0.469	5.96458e-33	T3	MA0715.1	PROP1
473	2.89047e-35	0.297793	0.615	0.51	2.15629e-32	T3	MA0140.2	GATA1::TAL1
474	5.31317e-34	0.270497	0.639	0.515	3.96362e-31	T3	MA0806.1	TBX4
475	6.43211e-34	0.274944	0.607	0.5	4.79835e-31	T3	MA0482.2	GATA4
476	1.88188e-29	0.28095	0.618	0.491	1.40388e-26	T3	MA0691.1	TFAP4
477	6.10439e-25	0.267421	0.559	0.469	4.55388e-22	T3	MA1505.1	HOXC8
478	5.12538e-22	0.321652	0.578	0.487	3.82353e-19	T3	MA0674.1	NKX6-1
479	5.12538e-22	0.321652	0.578	0.487	3.82353e-19	T3	MA0675.1	NKX6-2
480	5.12538e-22	0.321652	0.578	0.487	3.82353e-19	T3	MA1519.1	LHX5
481	2.75508e-21	0.288757	0.586	0.486	2.05529e-18	T3	MA0703.2	LMX1B
482	7.97171e-19	0.316933	0.582	0.496	5.9469e-16	T3	MA0854.1	Alx1
483	1.43022e-17	0.298401	0.577	0.492	1.06694e-14	T3	MA0704.1	Lhx4
484	1.43022e-17	0.298401	0.577	0.492	1.06694e-14	T3	MA0721.1	UNCX
485	0	4.77664	0.968	0.383	0	T1	MA1109.1	NEUROD1
486	0	4.72024	0.966	0.385	0	T1	MA1642.1	NEUROG2(var.2)
487	0	3.80168	0.958	0.399	0	T1	MA1638.1	HAND2
488	0	3.53516	0.951	0.401	0	T1	MA0091.1	TAL1::TCF3
489	0	2.71597	0.929	0.445	0	T1	MA1472.1	BHLHA15(var.2)
490	0	2.70217	0.93	0.442	0	T1	MA1467.1	ATOH1(var.2)
491	0	2.64811	0.923	0.423	0	T1	MA1618.1	Ptf1a
492	0	2.56289	0.913	0.427	0	T1	MA1468.1	ATOH7
493	0	2.45322	0.915	0.431	0	T1	MA0669.1	NEUROG2
494	0	2.40241	0.922	0.432	0	T1	MA1568.1	TCF21(var.2)
495	0	2.16983	0.908	0.469	0	T1	MA0816.1	Ascl2
496	0	2.13615	0.899	0.44	0	T1	MA1123.2	TWIST1
497	0	2.1252	0.9	0.453	0	T1	MA0832.1	Tcf21
498	0	2.02957	0.915	0.459	0	T1	MA0521.1	Tcf12
499	0	2.02604	0.889	0.441	0	T1	MA0668.1	NEUROD2
500	0	1.99995	0.871	0.501	0	T1	MA0867.2	SOX4
501	0	1.9847	0.894	0.481	0	T1	MA1100.2	ASCL1
502	0	1.97923	0.881	0.466	0	T1	MA1641.1	MYF5
503	0	1.96818	0.888	0.453	0	T1	MA1485.1	FERD3L
504	0	1.91201	0.88	0.446	0	T1	MA0623.2	NEUROG1
505	0	1.88222	0.879	0.438	0	T1	MA0461.2	Atoh1
506	0	1.87967	0.875	0.487	0	T1	MA0500.2	MYOG
507	0	1.79953	0.875	0.442	0	T1	MA0818.1	BHLHE22
508	0	1.75998	0.847	0.472	0	T1	MA0892.1	GSX1
509	0	1.75603	0.871	0.443	0	T1	MA0826.1	OLIG1
510	0	1.75551	0.858	0.485	0	T1	MA1120.1	SOX13
511	0	1.73374	0.842	0.477	0	T1	MA0027.2	EN1
512	0	1.72762	0.859	0.489	0	T1	MA1150.1	RORB
513	0	1.72381	0.87	0.468	0	T1	MA0665.1	MSC
514	0	1.71941	0.867	0.44	0	T1	MA0827.1	OLIG3
515	0	1.70694	0.855	0.473	0	T1	MA1619.1	Ptf1a(var.2)
516	0	1.69383	0.848	0.502	0	T1	MA0515.1	Sox6
517	0	1.69178	0.867	0.446	0	T1	MA0817.1	BHLHE23
518	0	1.6866	0.846	0.477	0	T1	MA0720.1	Shox2
519	0	1.68356	0.862	0.457	0	T1	MA0607.1	Bhlha15
520	0	1.66418	0.849	0.475	0	T1	MA0630.1	SHOX
521	0	1.65453	0.826	0.471	0	T1	MA0868.2	SOX8
522	0	1.64716	0.856	0.442	0	T1	MA0678.1	OLIG2
523	0	1.63559	0.835	0.475	0	T1	MA0699.1	LBX2
524	0	1.62089	0.853	0.484	0	T1	MA1151.1	RORC
525	0	1.61696	0.835	0.478	0	T1	MA0710.1	NOTO
526	0	1.61053	0.822	0.509	0	T1	MA1527.1	NFIC(var.2)
527	0	1.60522	0.843	0.472	0	T1	MA0654.1	ISX
528	0	1.60522	0.843	0.472	0	T1	MA0716.1	PRRX1
529	0	1.60522	0.843	0.472	0	T1	MA0717.1	RAX2
530	0	1.59599	0.853	0.468	0	T1	MA0633.1	Twist2
531	0	1.57389	0.845	0.497	0	T1	MA0514.1	Sox3
532	0	1.55922	0.868	0.468	0	T1	MA1524.1	MSGN1
533	0	1.55751	0.825	0.478	0	T1	MA0853.1	Alx4
534	0	1.53983	0.824	0.475	0	T1	MA0704.1	Lhx4
535	0	1.53983	0.824	0.475	0	T1	MA0721.1	UNCX
536	0	1.5298	0.836	0.476	0	T1	MA0889.1	GBX1
537	0	1.52668	0.831	0.479	0	T1	MA0854.1	Alx1
538	0	1.51887	0.824	0.47	0	T1	MA0666.1	MSX1
539	0	1.51484	0.828	0.484	0	T1	MA0143.4	SOX2
540	0	1.5133	0.849	0.497	0	T1	MA0048.2	NHLH1
541	0	1.51044	0.85	0.48	0	T1	MA0783.1	PKNOX2
542	0	1.5054	0.797	0.509	0	T1	MA1528.1	NFIX(var.2)
543	0	1.50539	0.833	0.479	0	T1	MA0621.1	mix-a
544	0	1.5047	0.808	0.469	0	T1	MA0890.1	GBX2
545	0	1.50019	0.836	0.511	0	T1	MA1635.1	BHLHE22(var.2)
546	0	1.49446	0.839	0.476	0	T1	MA0691.1	TFAP4
547	0	1.49039	0.813	0.48	0	T1	MA0068.2	PAX4
548	0	1.49039	0.813	0.48	0	T1	MA0705.1	Lhx8
549	0	1.49039	0.813	0.48	0	T1	MA1577.1	TLX2
550	0	1.49039	0.813	0.48	0	T1	MA0701.2	LHX9
551	0	1.49039	0.813	0.48	0	T1	MA0075.3	PRRX2
552	0	1.48515	0.833	0.476	0	T1	MA0874.1	Arx
553	0	1.47321	0.845	0.464	0	T1	MA0667.1	MYF6
554	0	1.46846	0.834	0.451	0	T1	MA1570.1	TFAP4(var.2)
555	0	1.46415	0.838	0.515	0	T1	MA1108.2	MXI1
556	0	1.45989	0.817	0.476	0	T1	MA0644.1	ESX1
557	0	1.43524	0.802	0.475	0	T1	MA0077.1	SOX9
558	0	1.43187	0.817	0.507	0	T1	MA0119.1	NFIC::TLX1
559	0	1.43036	0.814	0.477	0	T1	MA0658.1	LHX6
560	0	1.42576	0.817	0.463	0	T1	MA0125.1	Nobox
561	0	1.42336	0.861	0.485	0	T1	MA0499.2	MYOD1
562	0	1.42248	0.827	0.476	0	T1	MA0634.1	ALX3
563	0	1.41757	0.805	0.505	0	T1	MA1643.1	NFIB
564	0	1.41541	0.862	0.502	0	T1	MA0743.2	SCRT1
565	0	1.40811	0.817	0.483	0	T1	MA1463.1	ARGFX
566	0	1.39683	0.813	0.481	0	T1	MA0662.1	MIXL1
567	0	1.39605	0.839	0.475	0	T1	MA0797.1	TGIF2
568	0	1.39581	0.809	0.471	0	T1	MA0903.1	HOXB3
569	0	1.38624	0.821	0.482	0	T1	MA0793.1	POU6F2
570	0	1.3822	0.813	0.472	0	T1	MA0674.1	NKX6-1
571	0	1.3822	0.813	0.472	0	T1	MA0675.1	NKX6-2
572	0	1.3822	0.813	0.472	0	T1	MA1519.1	LHX5
573	0	1.37783	0.816	0.476	0	T1	MA0618.1	LBX1
574	0	1.36806	0.811	0.462	0	T1	MA0876.1	BSX
575	0	1.36364	0.813	0.48	0	T1	MA0642.1	EN2
576	0	1.35906	0.812	0.494	0	T1	MA0442.2	SOX10
577	0	1.35534	0.815	0.459	0	T1	MA1152.1	SOX15
578	0	1.35095	0.847	0.476	0	T1	MA1571.1	TGIF2LX
579	0	1.34172	0.834	0.476	0	T1	MA0796.1	TGIF1
580	0	1.3341	0.789	0.475	0	T1	MA0886.1	EMX2
581	0	1.3319	0.837	0.476	0	T1	MA1572.1	TGIF2LY
582	0	1.32197	0.797	0.473	0	T1	MA0725.1	VSX1
583	0	1.31754	0.808	0.462	0	T1	MA0882.1	DLX6
584	0	1.31441	0.805	0.469	0	T1	MA0628.1	POU6F1
585	0	1.29726	0.786	0.461	0	T1	MA0709.1	Msx3
586	0	1.2934	0.808	0.482	0	T1	MA0894.1	HESX1
587	0	1.29017	0.832	0.501	0	T1	MA0744.2	SCRT2
588	0	1.28075	0.795	0.477	0	T1	MA0718.1	RAX
589	0	1.27651	0.796	0.461	0	T1	MA0708.1	MSX2
590	0	1.23805	0.789	0.476	0	T1	MA0912.2	HOXD3
591	0	1.22362	0.775	0.46	0	T1	MA1501.1	HOXB7
592	0	1.21966	0.792	0.485	0	T1	MA1549.1	POU6F1(var.2)
593	0	1.21477	0.806	0.506	0	T1	MA0671.1	NFIX
594	0	1.21472	0.819	0.481	0	T1	MA1529.1	NHLH2
595	0	1.1964	0.812	0.501	0	T1	MA0078.1	Sox17
596	0	1.19352	0.788	0.473	0	T1	MA0703.2	LMX1B
597	0	1.17167	0.793	0.482	0	T1	MA0072.1	RORA(var.2)
598	0	1.16569	0.784	0.473	0	T1	MA0888.1	EVX2
599	0	1.16393	0.829	0.5	0	T1	MA0820.1	FIGLA
600	0	1.16372	0.83	0.512	0	T1	MA1628.1	Zic1::Zic2
601	0	1.16239	0.783	0.468	0	T1	MA0880.1	Dlx3
602	0	1.14129	0.766	0.461	0	T1	MA0702.2	LMX1A
603	0	1.13838	0.802	0.486	0	T1	MA0071.1	RORA
604	0	1.10187	0.804	0.518	0	T1	MA1629.1	Zic2
605	0	1.0841	0.794	0.511	0	T1	MA0858.1	Rarb(var.2)
606	0	1.05591	0.796	0.518	0	T1	MA0730.1	RARA(var.2)
607	0	1.05531	0.812	0.491	0	T1	MA1631.1	ASCL1(var.2)
608	0	1.01729	0.798	0.504	0	T1	MA0484.2	HNF4G
609	0	0.986502	0.83	0.526	0	T1	MA1548.1	PLAGL2
610	0	0.974856	0.788	0.501	0	T1	MA0114.4	HNF4A
611	0	0.904317	0.817	0.513	0	T1	MA0065.2	Pparg::Rxra
612	0	0.888075	0.787	0.514	0	T1	MA1531.1	NR1D1
613	0	0.866431	0.791	0.496	0	T1	MA0830.2	TCF4
614	0	0.854442	0.782	0.497	0	T1	MA0696.1	ZIC1
615	0	0.829845	0.775	0.495	0	T1	MA0751.1	ZIC4
616	3.5122e-305	1.12541	0.76	0.461	2.6201e-302	T1	MA0722.1	VAX1
617	3.5122e-305	1.12541	0.76	0.461	2.6201e-302	T1	MA0723.1	VAX2
618	3.5122e-305	1.12541	0.76	0.461	2.6201e-302	T1	MA1481.1	DRGX
619	1.90928e-304	0.7301	0.788	0.519	1.42432e-301	T1	MA1599.1	ZNF682
620	7.63744e-304	1.10802	0.756	0.466	5.69753e-301	T1	MA1497.1	HOXA6
621	1.51487e-302	0.776165	0.763	0.485	1.13009e-299	T1	MA0697.1	ZIC3
622	5.86768e-300	1.04258	0.766	0.473	4.37729e-297	T1	MA0887.1	EVX1
623	1.06137e-296	1.04583	0.749	0.467	7.9178e-294	T1	MA0700.2	LHX2
624	1.17773e-295	0.851151	0.776	0.513	8.7859e-293	T1	MA1559.1	SNAI3
625	1.8285e-295	0.947886	0.795	0.512	1.36406e-292	T1	MA1532.1	NR1D2
626	1.92961e-295	0.696006	0.785	0.511	1.43949e-292	T1	MA1615.1	Plagl1
627	1.79215e-294	1.12158	0.777	0.475	1.33695e-291	T1	MA0707.1	MNX1
628	1.95024e-294	0.967347	0.789	0.519	1.45488e-291	T1	MA1575.1	THRB(var.2)
629	1.05239e-292	0.960709	0.792	0.513	7.85079e-290	T1	MA1535.1	NR2C1
630	3.24731e-292	0.895657	0.769	0.501	2.42249e-289	T1	MA0056.2	MZF1
631	5.07039e-292	1.16398	0.774	0.472	3.78251e-289	T1	MA0132.2	PDX1
632	5.07039e-292	1.16398	0.774	0.472	3.78251e-289	T1	MA0612.2	EMX1
633	5.07039e-292	1.16398	0.774	0.472	3.78251e-289	T1	MA0893.2	GSX2
634	5.07039e-292	1.16398	0.774	0.472	3.78251e-289	T1	MA0900.2	HOXA2
635	5.07039e-292	1.16398	0.774	0.472	3.78251e-289	T1	MA0902.2	HOXB2
636	7.13484e-291	0.885383	0.795	0.524	5.32259e-288	T1	MA1491.1	GLI3
637	5.36753e-290	0.59595	0.773	0.496	4.00417e-287	T1	MA0493.1	Klf1
638	4.74318e-288	0.86569	0.797	0.524	3.53841e-285	T1	MA0734.2	GLI2
639	3.34749e-285	0.828695	0.763	0.499	2.49723e-282	T1	MA1648.1	TCF12(var.2)
640	8.67044e-284	0.8676	0.766	0.501	6.46815e-281	T1	MA0074.1	RXRA::VDR
641	1.86563e-283	0.848091	0.774	0.507	1.39176e-280	T1	MA0505.1	Nr5a2
642	2.14737e-283	0.990003	0.802	0.524	1.60194e-280	T1	MA0258.2	ESR2
643	1.83143e-279	0.81898	0.763	0.5	1.36624e-276	T1	MA0522.3	TCF3
644	8.26544e-278	0.921794	0.75	0.486	6.16602e-275	T1	MA1496.1	HOXA4
645	4.20746e-277	1.17054	0.781	0.526	3.13877e-274	T1	MA0739.1	Hic1
646	5.91605e-275	0.814052	0.762	0.51	4.41337e-272	T1	MA1558.1	SNAI1
647	1.0884e-273	1.17048	0.792	0.523	8.11943e-271	T1	MA0161.2	NFIC
648	1.51186e-273	0.883181	0.78	0.496	1.12785e-270	T1	MA0160.1	NR4A2
649	3.12449e-273	0.902267	0.762	0.502	2.33087e-270	T1	MA0100.3	MYB
650	9.60998e-273	1.09371	0.771	0.474	7.16905e-270	T1	MA0726.1	VSX2
651	1.94122e-272	0.871041	0.77	0.514	1.44815e-269	T1	MA1649.1	ZBTB12
652	5.24838e-272	1.01383	0.749	0.47	3.91529e-269	T1	MA0706.1	MEOX2
653	9.37417e-271	0.838373	0.763	0.498	6.99313e-268	T1	MA0693.2	VDR
654	2.49508e-270	0.949669	0.769	0.506	1.86133e-267	T1	MA1110.1	NR1H4
655	1.16975e-269	0.675414	0.771	0.512	8.72635e-267	T1	MA1581.1	ZBTB6
656	1.23245e-267	1.11873	0.76	0.468	9.19409e-265	T1	MA0661.1	MEOX1
657	1.72228e-267	0.861876	0.754	0.491	1.28482e-264	T1	MA1536.1	NR2C2(var.2)
658	3.90836e-267	0.889313	0.781	0.52	2.91564e-264	T1	MA1576.1	THRB(var.3)
659	2.49595e-264	1.07228	0.771	0.503	1.86198e-261	T1	MA0670.1	NFIA
660	4.64434e-262	0.669615	0.744	0.484	3.46468e-259	T1	MA1584.1	ZIC5
661	1.78584e-261	0.795021	0.78	0.521	1.33224e-258	T1	MA1656.1	ZNF449
662	1.43811e-260	0.934807	0.739	0.471	1.07283e-257	T1	MA0158.2	HOXA5
663	4.12009e-259	0.905275	0.794	0.531	3.07358e-256	T1	MA1654.1	ZNF16
664	2.67216e-258	0.872638	0.775	0.517	1.99343e-255	T1	MA1149.1	RARA::RXRG
665	7.22813e-257	0.826318	0.768	0.521	5.39218e-254	T1	MA0860.1	Rarg(var.2)
666	1.78825e-254	0.854195	0.779	0.523	1.33403e-251	T1	MA0737.1	GLIS3
667	1.96118e-253	0.975372	0.737	0.476	1.46304e-250	T1	MA1530.1	NKX6-3
668	3.22174e-252	0.824526	0.771	0.511	2.40341e-249	T1	MA1566.1	TBX3
669	9.06246e-251	0.926746	0.778	0.521	6.7606e-248	T1	MA1655.1	ZNF341
670	1.09692e-249	1.151	0.777	0.479	8.18302e-247	T1	MA1562.1	SOX14
671	2.14267e-247	0.688883	0.764	0.509	1.59844e-244	T1	MA0139.1	CTCF
672	9.65473e-246	1.11564	0.751	0.468	7.20243e-243	T1	MA0875.1	BARX1
673	4.51617e-244	0.911985	0.731	0.465	3.36906e-241	T1	MA1495.1	HOXA1
674	4.51617e-244	0.911985	0.731	0.465	3.36906e-241	T1	MA0904.2	HOXB5
675	1.74853e-243	0.895168	0.736	0.467	1.3044e-240	T1	MA0881.1	Dlx4
676	1.9717e-242	0.959529	0.775	0.531	1.47089e-239	T1	MA0066.1	PPARG
677	3.07556e-242	0.801014	0.753	0.506	2.29437e-239	T1	MA0806.1	TBX4
678	3.47671e-239	0.507387	0.749	0.493	2.59363e-236	T1	MA0163.1	PLAG1
679	8.71317e-237	0.761167	0.759	0.518	6.50002e-234	T1	MA1621.1	Rbpjl
680	1.10835e-235	0.850772	0.716	0.458	8.26831e-233	T1	MA1505.1	HOXC8
681	7.58796e-235	0.869345	0.761	0.516	5.66062e-232	T1	MA0596.1	SREBF2
682	3.20039e-234	0.940737	0.731	0.476	2.38749e-231	T1	MA0879.1	Dlx1
683	3.90004e-232	0.759826	0.754	0.517	2.90943e-229	T1	MA1620.1	Ptf1a(var.3)
684	2.02393e-231	0.777198	0.737	0.481	1.50985e-228	T1	MA1111.1	NR2F2
685	2.66326e-231	0.806301	0.742	0.486	1.98679e-228	T1	MA0141.3	ESRRB
686	6.09829e-230	0.798613	0.755	0.511	4.54932e-227	T1	MA0159.1	RARA::RXRA
687	8.01266e-230	0.763424	0.752	0.506	5.97744e-227	T1	MA1537.1	NR2F1(var.2)
688	1.70366e-228	0.790133	0.756	0.498	1.27093e-225	T1	MA0782.2	PKNOX1
689	9.2874e-228	0.793071	0.748	0.511	6.9284e-225	T1	MA0111.1	Spz1
690	7.49381e-225	0.769458	0.754	0.512	5.59038e-222	T1	MA0807.1	TBX5
691	1.91471e-224	0.801259	0.762	0.517	1.42837e-221	T1	MA0513.1	SMAD2::SMAD3::SMAD4
692	2.09249e-221	0.765676	0.751	0.511	1.561e-218	T1	MA1567.1	TBX6
693	1.51972e-220	0.809309	0.758	0.504	1.13371e-217	T1	MA0093.3	USF1
694	4.71089e-220	0.727086	0.742	0.518	3.51433e-217	T1	MA0745.2	SNAI2
695	1.83618e-219	0.823657	0.755	0.526	1.36979e-216	T1	MA0738.1	HIC2
696	2.71683e-219	0.735469	0.743	0.505	2.02676e-216	T1	MA0677.1	Nr2f6
697	4.43973e-215	0.7745	0.747	0.517	3.31204e-212	T1	MA0801.1	MGA
698	4.43973e-215	0.7745	0.747	0.517	3.31204e-212	T1	MA0803.1	TBX15
699	6.48416e-215	0.822487	0.724	0.483	4.83718e-212	T1	MA1507.1	HOXD4
700	6.43016e-214	0.842491	0.761	0.521	4.7969e-211	T1	MA0597.1	THAP1
701	1.22501e-213	0.665434	0.735	0.502	9.13859e-211	T1	MA0857.1	Rarb
702	1.83264e-211	0.895557	0.735	0.482	1.36715e-208	T1	MA1518.1	LHX1
703	4.88774e-211	0.852835	0.778	0.534	3.64625e-208	T1	MA1600.1	ZNF684
704	5.67911e-210	0.752401	0.735	0.502	4.23661e-207	T1	MA1540.1	NR5A1
705	7.61404e-208	0.859285	0.717	0.467	5.68007e-205	T1	MA0835.2	BATF3
706	1.53183e-207	0.910882	0.745	0.5	1.14275e-204	T1	MA1633.1	BACH1
707	4.99819e-207	0.740842	0.73	0.485	3.72865e-204	T1	MA0643.1	Esrrg
708	1.29644e-205	0.849487	0.719	0.466	9.67147e-203	T1	MA1634.1	BATF
709	1.80597e-205	0.872969	0.752	0.527	1.34725e-202	T1	MA0002.2	RUNX1
710	4.47156e-204	0.898068	0.756	0.51	3.33579e-201	T1	MA1593.1	ZNF317
711	4.6162e-204	0.693997	0.731	0.498	3.44368e-201	T1	MA1148.1	PPARA::RXRA
712	5.49058e-204	0.836324	0.695	0.454	4.09597e-201	T1	MA1500.1	HOXB6
713	5.84763e-204	0.761364	0.757	0.531	4.36233e-201	T1	MA0116.1	Znf423
714	1.30584e-203	0.730046	0.734	0.504	9.74154e-201	T1	MA0805.1	TBX1
715	6.38193e-202	0.747593	0.746	0.516	4.76092e-199	T1	MA0595.1	SREBF1
716	1.45285e-201	0.842507	0.716	0.465	1.08382e-198	T1	MA0462.2	BATF::JUN
717	8.25286e-199	0.881737	0.739	0.509	6.15663e-196	T1	MA0150.2	Nfe2l2
718	1.57422e-198	0.727977	0.765	0.519	1.17437e-195	T1	MA1637.1	EBF3
719	4.08069e-198	0.798589	0.746	0.514	3.0442e-195	T1	MA0092.1	Hand1::Tcf3
720	3.84853e-196	0.756946	0.749	0.516	2.871e-193	T1	MA1579.1	ZBTB26
721	2.33868e-194	0.863513	0.75	0.513	1.74466e-191	T1	MA0591.1	Bach1::Mafk
722	6.85671e-194	1.09776	0.699	0.398	5.1151e-191	T1	MA0714.1	PITX3
723	1.30686e-190	0.566186	0.728	0.498	9.74914e-188	T1	MA0504.1	NR2C2
724	6.31381e-190	0.639882	0.735	0.507	4.7101e-187	T1	MA0017.2	NR2F1
725	1.85888e-188	0.719711	0.751	0.52	1.38672e-185	T1	MA1604.1	Ebf2
726	2.34472e-187	0.723739	0.681	0.459	1.74916e-184	T1	MA0713.1	PHOX2A
727	1.07491e-186	0.770491	0.727	0.498	8.01883e-184	T1	MA0501.1	MAF::NFE2
728	4.45529e-186	0.849942	0.703	0.467	3.32364e-183	T1	MA0099.3	FOS::JUN
729	2.49848e-185	1.09785	0.697	0.392	1.86386e-182	T1	MA0712.2	OTX2
730	8.34964e-185	0.720104	0.732	0.512	6.22883e-182	T1	MA1539.1	NR2F6(var.3)
731	4.68227e-184	1.03799	0.702	0.403	3.49298e-181	T1	MA1547.1	PITX2
732	4.14979e-182	0.741192	0.729	0.511	3.09574e-179	T1	MA0113.3	NR3C1
733	1.5684e-181	0.734674	0.706	0.483	1.17002e-178	T1	MA1499.1	HOXB4
734	1.65253e-181	0.824503	0.695	0.468	1.23278e-178	T1	MA0477.2	FOSL1
735	3.65106e-180	0.636334	0.719	0.504	2.72369e-177	T1	MA0859.1	Rarg
736	1.27321e-179	0.674556	0.727	0.49	9.49814e-177	T1	MA0592.3	ESRRA
737	2.65606e-179	0.736381	0.728	0.515	1.98142e-176	T1	MA0646.1	GCM1
738	7.47406e-179	0.637296	0.731	0.516	5.57565e-176	T1	MA0494.1	Nr1h3::Rxra
739	2.33045e-178	1.12452	0.695	0.401	1.73851e-175	T1	MA0648.1	GSC
740	6.06527e-178	0.61928	0.728	0.51	4.52469e-175	T1	MA1565.1	TBX18
741	1.03367e-177	0.726391	0.731	0.516	7.7112e-175	T1	MA0503.1	Nkx2-5(var.2)
742	2.5388e-177	0.768203	0.744	0.516	1.89395e-174	T1	MA1647.1	PRDM4
743	2.62646e-175	0.707362	0.725	0.514	1.95934e-172	T1	MA1594.1	ZNF382
744	1.00489e-174	0.639038	0.722	0.504	7.49645e-172	T1	MA1574.1	THRB
745	1.06862e-174	0.69185	0.73	0.516	7.97192e-172	T1	MA1645.1	NKX2-2
746	6.95255e-174	0.530832	0.741	0.517	5.1866e-171	T1	MA1514.1	KLF17
747	1.32166e-173	0.660079	0.717	0.504	9.85955e-171	T1	MA0063.2	NKX2-5
748	2.42375e-173	0.779786	0.72	0.511	1.80812e-170	T1	MA0488.1	JUN
749	4.12525e-173	0.75226	0.729	0.517	3.07744e-170	T1	MA0007.3	Ar
750	4.55174e-173	0.591201	0.688	0.476	3.3956e-170	T1	MA0124.2	Nkx3-1
751	4.91455e-173	0.649955	0.716	0.502	3.66626e-170	T1	MA0115.1	NR1H2::RXRA
752	5.23144e-173	0.701793	0.694	0.471	3.90265e-170	T1	MA0601.1	Arid3b
753	1.0769e-171	0.808192	0.685	0.467	8.03364e-169	T1	MA1141.1	FOS::JUND
754	1.27162e-171	0.656016	0.712	0.5	9.48627e-169	T1	MA0688.1	TBX2
755	5.45824e-171	0.625792	0.71	0.503	4.07185e-168	T1	MA1533.1	NR1I2
756	5.75552e-171	0.676876	0.718	0.503	4.29362e-168	T1	MA0526.3	USF2
757	7.61334e-171	0.62229	0.71	0.512	5.67955e-168	T1	MA0112.3	ESR1
758	1.53387e-170	0.724979	0.711	0.502	1.14427e-167	T1	MA0492.1	JUND(var.2)
759	1.70318e-170	0.592574	0.71	0.508	1.27057e-167	T1	MA0496.3	MAFK
760	4.16946e-169	0.764458	0.698	0.474	3.11041e-166	T1	MA1101.2	BACH2
761	5.60164e-169	0.808951	0.691	0.466	4.17882e-166	T1	MA1128.1	FOSL1::JUN
762	9.33743e-167	0.80181	0.687	0.464	6.96573e-164	T1	MA1144.1	FOSL2::JUND
763	1.41219e-166	0.620855	0.681	0.472	1.05349e-163	T1	MA0724.1	VENTX
764	1.79915e-166	0.81644	0.7	0.479	1.34216e-163	T1	MA0478.1	FOSL2
765	8.22453e-166	0.670745	0.735	0.521	6.1355e-163	T1	MA0138.2	REST
766	3.2603e-165	0.885111	0.71	0.486	2.43219e-162	T1	MA1476.1	DLX5
767	9.38127e-165	0.95071	0.69	0.405	6.99842e-162	T1	MA0682.2	PITX1
768	3.98773e-164	0.780741	0.685	0.464	2.97485e-161	T1	MA1134.1	FOS::JUNB
769	9.30644e-164	0.741321	0.745	0.522	6.94261e-161	T1	MA1646.1	OSR2
770	6.25995e-163	0.781866	0.679	0.469	4.66992e-160	T1	MA1135.1	FOSB::JUNB
771	6.48586e-160	0.604079	0.71	0.507	4.83845e-157	T1	MA1555.1	RXRB(var.2)
772	3.57602e-159	0.782682	0.692	0.477	2.66771e-156	T1	MA1622.1	Smad2::Smad3
773	4.08797e-159	1.01253	0.672	0.396	3.04962e-156	T1	MA0891.1	GSC2
774	8.57245e-159	0.794467	0.681	0.467	6.39505e-156	T1	MA1130.1	FOSL2::JUN
775	1.42172e-158	0.636531	0.722	0.514	1.0606e-155	T1	MA1601.1	ZNF75D
776	1.01985e-157	0.654941	0.729	0.513	7.60805e-155	T1	MA1114.1	PBX3
777	3.93946e-157	0.652284	0.678	0.474	2.93884e-154	T1	MA1504.1	HOXC4
778	4.57706e-157	0.758006	0.713	0.497	3.41448e-154	T1	MA0089.2	NFE2L1
779	4.20022e-154	0.731902	0.681	0.47	3.13336e-151	T1	MA0885.1	Dlx2
780	1.465e-153	0.603844	0.707	0.501	1.09289e-150	T1	MA1541.1	NR6A1
781	1.99744e-152	0.694866	0.712	0.503	1.49009e-149	T1	MA1632.1	ATF2
782	2.3806e-151	0.737695	0.679	0.465	1.77593e-148	T1	MA1142.1	FOSL1::JUND
783	3.15954e-151	0.609504	0.727	0.516	2.35702e-148	T1	MA0761.2	ETV1
784	5.80047e-151	0.724893	0.672	0.46	4.32715e-148	T1	MA1137.1	FOSL1::JUNB
785	8.27482e-151	0.638313	0.715	0.511	6.17301e-148	T1	MA1147.1	NR4A2::RXRA
786	4.0656e-150	0.693177	0.673	0.465	3.03294e-147	T1	MA0896.1	Hmx1
787	4.77788e-150	0.708216	0.678	0.463	3.5643e-147	T1	MA0491.2	JUND
788	6.45924e-150	0.587433	0.705	0.503	4.81859e-147	T1	MA0856.1	RXRG
789	2.73907e-149	0.629247	0.673	0.465	2.04335e-146	T1	MA1534.1	NR1I3
790	7.66618e-149	0.384533	0.707	0.494	5.71897e-146	T1	MA1522.1	MAZ
791	8.0027e-148	0.605005	0.669	0.465	5.97001e-145	T1	MA0897.1	Hmx2
792	1.07024e-147	0.629794	0.709	0.499	7.98401e-145	T1	MA0802.1	TBR1
793	1.70508e-147	0.696373	0.682	0.466	1.27199e-144	T1	MA0490.2	JUNB
794	3.32781e-147	0.728439	0.673	0.46	2.48254e-144	T1	MA1138.1	FOSL2::JUNB
795	6.47886e-146	0.551725	0.68	0.48	4.83323e-143	T1	MA1105.2	GRHL2
796	1.54124e-145	0.596614	0.69	0.503	1.14976e-142	T1	MA1494.1	HNF4A(var.2)
797	9.51141e-144	0.602486	0.697	0.504	7.09551e-141	T1	MA0140.2	GATA1::TAL1
798	7.10735e-143	0.655119	0.721	0.523	5.30208e-140	T1	MA1153.1	Smad4
799	8.5519e-143	0.63552	0.704	0.511	6.37972e-140	T1	MA1146.1	NR1H4::RXRA
800	2.84225e-142	0.609588	0.69	0.5	2.12032e-139	T1	MA0009.2	TBXT
801	8.22762e-142	0.739113	0.685	0.481	6.1378e-139	T1	MA0841.1	NFE2
802	1.95062e-141	0.566729	0.665	0.466	1.45516e-138	T1	MA0135.1	Lhx3
803	2.07867e-141	0.649668	0.678	0.471	1.55068e-138	T1	MA1561.1	SOX12
804	2.08009e-141	0.646815	0.706	0.503	1.55175e-138	T1	MA1608.1	Isl1
805	3.21476e-141	0.54461	0.704	0.508	2.39821e-138	T1	MA0502.2	NFYB
806	4.13307e-141	0.721585	0.718	0.493	3.08327e-138	T1	MA0698.1	ZBTB18
807	6.99392e-141	0.586952	0.746	0.531	5.21746e-138	T1	MA0155.1	INSM1
808	8.82752e-141	0.555303	0.732	0.522	6.58533e-138	T1	MA0764.2	ETV4
809	9.7598e-140	0.601791	0.664	0.467	7.28081e-137	T1	MA0898.1	Hmx3
810	1.7463e-139	0.586265	0.692	0.505	1.30274e-136	T1	MA1553.1	RARG(var.3)
811	2.47081e-139	0.578576	0.698	0.506	1.84323e-136	T1	MA1552.1	RARB(var.3)
812	3.34547e-139	0.677776	0.714	0.515	2.49572e-136	T1	MA1592.1	ZNF274
813	7.53081e-139	0.417789	0.7	0.491	5.61798e-136	T1	MA0753.2	ZNF740
814	1.98052e-135	0.516982	0.699	0.513	1.47747e-132	T1	MA0778.1	NFKB2
815	2.30548e-135	0.643853	0.705	0.505	1.71989e-132	T1	MA0771.1	HSF4
816	9.29382e-135	0.51548	0.696	0.515	6.93319e-132	T1	MA0105.4	NFKB1
817	1.19756e-134	0.609303	0.711	0.513	8.93379e-132	T1	MA1538.1	NR2F1(var.3)
818	1.76235e-134	0.557552	0.698	0.509	1.31472e-131	T1	MA1556.1	RXRG(var.2)
819	2.1058e-133	0.578686	0.702	0.507	1.57093e-130	T1	MA1578.1	VEZF1
820	2.7939e-132	0.553543	0.688	0.502	2.08425e-129	T1	MA0512.2	Rxra
821	3.28661e-130	0.771205	0.629	0.391	2.45181e-127	T1	MA0883.1	Dmbx1
822	4.73792e-130	0.602559	0.708	0.516	3.53449e-127	T1	MA1597.1	ZNF528
823	8.39614e-130	0.667935	0.665	0.471	6.26352e-127	T1	MA1132.1	JUN::JUNB
824	1.09881e-129	0.585323	0.696	0.504	8.19714e-127	T1	MA0164.1	Nr2e3
825	1.12541e-129	0.571299	0.693	0.499	8.39555e-127	T1	MA0800.1	EOMES
826	6.14636e-129	0.618092	0.731	0.523	4.58518e-126	T1	MA0154.4	EBF1
827	3.94444e-127	0.618008	0.68	0.486	2.94256e-124	T1	MA0768.1	LEF1
828	2.73289e-125	0.532966	0.689	0.503	2.03873e-122	T1	MA0855.1	RXRB
829	9.54948e-125	0.576558	0.701	0.515	7.12391e-122	T1	MA0057.1	MZF1(var.2)
830	3.45825e-124	0.844858	0.636	0.392	2.57985e-121	T1	MA0467.1	Crx
831	6.30401e-124	0.55658	0.68	0.51	4.70279e-121	T1	MA1585.1	ZKSCAN1
832	2.19924e-123	0.552359	0.665	0.475	1.64063e-120	T1	MA0683.1	POU4F2
833	6.23564e-123	0.555589	0.689	0.503	4.65179e-120	T1	MA0690.1	TBX21
834	7.98057e-121	0.525372	0.663	0.487	5.9535e-118	T1	MA0672.1	NKX2-3
835	8.66518e-121	0.507098	0.669	0.495	6.46422e-118	T1	MA0482.2	GATA4
836	8.81205e-121	0.562853	0.679	0.5	6.57379e-118	T1	MA0673.1	NKX2-8
837	3.70569e-120	0.561569	0.683	0.504	2.76445e-117	T1	MA0689.1	TBX20
838	3.78143e-120	0.668548	0.669	0.474	2.82094e-117	T1	MA0489.1	JUN(var.2)
839	2.7183e-119	0.523035	0.708	0.517	2.02785e-116	T1	MA0640.2	ELF3
840	5.13283e-119	0.585588	0.685	0.511	3.82909e-116	T1	MA0727.1	NR3C2
841	1.70541e-118	0.662717	0.637	0.408	1.27224e-115	T1	MA0719.1	RHOXF1
842	5.83347e-118	0.588877	0.697	0.514	4.35177e-115	T1	MA0059.1	MAX::MYC
843	4.65942e-117	0.483176	0.676	0.507	3.47593e-114	T1	MA0729.1	RARA
844	5.14766e-117	0.499876	0.679	0.495	3.84016e-114	T1	MA0036.3	GATA2
845	6.29919e-117	0.596004	0.659	0.481	4.6992e-114	T1	MA0087.1	Sox5
846	9.12053e-117	0.514426	0.682	0.504	6.80392e-114	T1	MA1550.1	PPARD
847	4.8306e-115	0.521079	0.713	0.516	3.60363e-112	T1	MA0062.3	GABPA
848	7.80224e-112	0.387234	0.687	0.498	5.82047e-109	T1	MA1630.1	Znf281
849	6.18992e-111	0.568612	0.699	0.522	4.61768e-108	T1	MA1523.1	MSANTD3
850	1.04462e-110	0.550993	0.67	0.49	7.79285e-108	T1	MA1421.1	TCF7L1
851	4.10804e-110	0.623834	0.645	0.468	3.0646e-107	T1	MA0476.1	FOS
852	5.0915e-110	0.57456	0.68	0.507	3.79826e-107	T1	MA0486.2	HSF1
853	8.74716e-110	0.317921	0.655	0.476	6.52538e-107	T1	MA1511.1	KLF10
854	8.78027e-109	0.486063	0.629	0.464	6.55008e-106	T1	MA0715.1	PROP1
855	1.94639e-108	0.512383	0.679	0.503	1.45201e-105	T1	MA1542.1	OSR1
856	2.44453e-108	0.56864	0.669	0.502	1.82362e-105	T1	MA0870.1	Sox1
857	1.92577e-107	0.592471	0.651	0.47	1.43663e-104	T1	MA0655.1	JDP2
858	1.56305e-106	0.481875	0.668	0.497	1.16603e-103	T1	MA0037.3	GATA3
859	1.10614e-104	0.363753	0.678	0.504	8.2518e-102	T1	MA0073.1	RREB1
860	1.34703e-104	0.516163	0.69	0.508	1.00489e-101	T1	MA0508.3	PRDM1
861	2.31694e-104	0.421341	0.673	0.508	1.72844e-101	T1	MA0103.3	ZEB1
862	3.38705e-104	0.491611	0.645	0.474	2.52674e-101	T1	MA0914.1	ISL2
863	4.82129e-104	0.472558	0.693	0.517	3.59668e-101	T1	MA0473.3	ELF1
864	4.88049e-104	0.5401	0.678	0.509	3.64085e-101	T1	MA1624.1	Stat5a
865	8.40713e-104	0.460201	0.642	0.475	6.27172e-101	T1	MA0647.1	GRHL1
866	3.27604e-103	0.455592	0.689	0.512	2.44393e-100	T1	MA0736.1	GLIS2
867	5.98254e-103	0.740261	0.686	0.522	4.46298e-100	T1	MA1563.1	SOX18
868	2.59201e-102	0.533552	0.677	0.501	1.93364e-99	T1	MA0659.2	MAFG
869	2.9929e-101	0.474013	0.664	0.503	2.2327e-98	T1	MA0083.3	SRF
870	1.16428e-100	0.523486	0.679	0.515	8.68554e-98	T1	MA1154.1	ZNF282
871	2.54079e-100	0.50744	0.663	0.499	1.89543e-97	T1	MA0731.1	BCL6B
872	1.73361e-98	0.478461	0.662	0.505	1.29328e-95	T1	MA0766.2	GATA5
873	6.31543e-97	0.68416	0.707	0.534	4.71131e-94	T1	MA0798.2	RFX3
874	8.913e-97	0.516564	0.666	0.5	6.6491e-94	T1	MA0770.1	HSF2
875	9.27819e-96	0.608124	0.69	0.52	6.92153e-93	T1	MA0106.3	TP53
876	1.75022e-95	0.465361	0.637	0.457	1.30567e-92	T1	MA0035.4	GATA1
877	3.0235e-95	0.500273	0.651	0.492	2.25553e-92	T1	MA0866.1	SOX21
878	1.42256e-94	0.414704	0.627	0.474	1.06123e-91	T1	MA0895.1	HMBOX1
879	5.51798e-94	0.443232	0.669	0.499	4.11641e-91	T1	MA1616.1	Prdm15
880	1.04102e-93	0.399611	0.679	0.517	7.76598e-91	T1	MA1573.1	THAP11
881	6.62326e-93	0.423321	0.646	0.487	4.94095e-90	T1	MA0631.1	Six3
882	9.49411e-93	0.575073	0.658	0.497	7.0826e-90	T1	MA0142.1	Pou5f1::Sox2
883	5.93344e-92	0.441303	0.652	0.498	4.42634e-89	T1	MA0752.1	ZNF410
884	1.94089e-88	0.41622	0.637	0.483	1.4479e-85	T1	MA0029.1	Mecom
885	8.99288e-88	0.505302	0.661	0.501	6.70868e-85	T1	MA0842.2	NRL
886	1.78257e-87	0.418397	0.627	0.483	1.3298e-84	T1	MA0102.4	CEBPA
887	6.51811e-87	0.479167	0.67	0.522	4.86251e-84	T1	MA0088.2	ZNF143
888	4.95092e-86	0.536292	0.673	0.507	3.69339e-83	T1	MA1520.1	MAF
889	5.1759e-86	0.440904	0.621	0.462	3.86122e-83	T1	MA0084.1	SRY
890	7.01325e-86	0.486322	0.662	0.499	5.23188e-83	T1	MA0117.2	Mafb
891	7.67068e-85	0.609719	0.703	0.535	5.72233e-82	T1	MA0509.2	RFX1
892	1.72294e-84	0.444743	0.651	0.496	1.28531e-81	T1	MA1119.1	SIX2
893	2.48077e-83	0.453836	0.622	0.474	1.85066e-80	T1	MA0787.1	POU3F2
894	4.14652e-83	0.44505	0.628	0.475	3.09331e-80	T1	MA0784.1	POU1F1
895	2.43546e-82	0.388078	0.614	0.462	1.81685e-79	T1	MA0153.2	HNF1B
896	3.27069e-82	0.418111	0.62	0.467	2.43994e-79	T1	MA0788.1	POU3F3
897	1.8901e-81	0.51422	0.687	0.524	1.41002e-78	T1	MA0626.1	Npas2
898	7.5091e-81	0.411817	0.605	0.467	5.60179e-78	T1	MA0676.1	Nr2e1
899	1.30799e-80	0.33855	0.632	0.49	9.75761e-78	T1	MA0742.1	Klf12
900	1.61681e-80	0.435551	0.637	0.493	1.20614e-77	T1	MA0804.1	TBX19
901	2.73137e-80	0.535053	0.648	0.493	2.0376e-77	T1	MA0523.1	TCF7L2
902	2.22978e-79	0.446696	0.654	0.482	1.66342e-76	T1	MA0775.1	MEIS3
903	2.97955e-78	0.50949	0.657	0.505	2.22274e-75	T1	MA0069.1	PAX6
904	5.52392e-78	0.424406	0.647	0.496	4.12084e-75	T1	MA0684.2	RUNX3
905	6.54441e-78	0.432157	0.667	0.516	4.88213e-75	T1	MA1589.1	ZNF140
906	7.83573e-78	0.399267	0.644	0.504	5.84545e-75	T1	MA0728.1	Nr2f6(var.2)
907	1.06427e-76	0.438318	0.629	0.486	7.93947e-74	T1	MA0836.2	CEBPD
908	1.46634e-76	0.419413	0.615	0.472	1.09389e-73	T1	MA0780.1	PAX3
909	6.77224e-76	0.464448	0.66	0.512	5.05209e-73	T1	MA0518.1	Stat4
910	7.68881e-76	0.432489	0.649	0.511	5.73585e-73	T1	MA0795.1	SMAD3
911	8.07755e-76	0.4203	0.65	0.512	6.02585e-73	T1	MA1493.1	HES6
912	2.15397e-75	0.463866	0.673	0.525	1.60686e-72	T1	MA1116.1	RBPJ
913	3.31304e-75	0.384288	0.643	0.491	2.47153e-72	T1	MA0687.1	SPIC
914	4.77963e-75	0.405729	0.624	0.477	3.5656e-72	T1	MA0650.2	HOXA13
915	5.36044e-75	0.401966	0.609	0.469	3.99889e-72	T1	MA0653.1	IRF9
916	5.76387e-75	0.399989	0.614	0.468	4.29985e-72	T1	MA0680.1	PAX7
917	2.15804e-74	0.478504	0.662	0.518	1.6099e-71	T1	MA0863.1	MTF1
918	2.65568e-74	0.445619	0.638	0.504	1.98113e-71	T1	MA1487.1	FOXE1
919	3.84808e-74	0.442872	0.649	0.505	2.87067e-71	T1	MA0480.1	Foxo1
920	3.84711e-73	0.40702	0.634	0.47	2.86994e-70	T1	MA0774.1	MEIS2
921	4.32551e-73	0.434751	0.63	0.496	3.22683e-70	T1	MA0593.1	FOXP2
922	5.58366e-73	0.390411	0.624	0.494	4.16541e-70	T1	MA1588.1	ZNF136
923	1.7987e-72	0.394505	0.61	0.465	1.34183e-69	T1	MA0785.1	POU2F1
924	3.16333e-72	0.388645	0.644	0.503	2.35984e-69	T1	MA0483.1	Gfi1b
925	1.69209e-71	0.473727	0.654	0.514	1.2623e-68	T1	MA1117.1	RELB
926	2.00716e-71	0.488065	0.669	0.511	1.49734e-68	T1	MA1521.1	MAFA
927	3.71017e-71	0.508468	0.672	0.522	2.76779e-68	T1	MA1124.1	ZNF24
928	5.02742e-71	0.476018	0.605	0.469	3.75046e-68	T1	MA1502.1	HOXB8
929	1.54902e-70	0.351549	0.65	0.501	1.15557e-67	T1	MA0657.1	KLF13
930	1.72161e-70	0.448432	0.645	0.512	1.28432e-67	T1	MA0107.1	RELA
931	2.66863e-70	0.469874	0.659	0.516	1.9908e-67	T1	MA1625.1	Stat5b
932	3.186e-69	0.382937	0.61	0.476	2.37676e-66	T1	MA0884.1	DUXA
933	3.50098e-68	0.348425	0.596	0.463	2.61173e-65	T1	MA0046.2	HNF1A
934	1.40569e-67	0.479062	0.633	0.501	1.04864e-64	T1	MA0018.4	CREB1
935	3.784e-67	0.429346	0.649	0.514	2.82287e-64	T1	MA0861.1	TP73
936	2.48401e-66	0.377546	0.631	0.475	1.85307e-63	T1	MA1112.2	NR4A1
937	7.63302e-65	0.361882	0.664	0.517	5.69423e-62	T1	MA0081.2	SPIB
938	8.54801e-65	0.373874	0.651	0.51	6.37681e-62	T1	MA0598.3	EHF
939	8.61408e-65	0.445852	0.669	0.522	6.4261e-62	T1	MA0144.2	STAT3
940	1.21251e-64	0.361706	0.597	0.47	9.04533e-62	T1	MA1657.1	ZNF652
941	2.57586e-64	0.340243	0.629	0.49	1.92159e-61	T1	MA1104.2	GATA6
942	3.14824e-64	0.377643	0.613	0.486	2.34859e-61	T1	MA0865.1	E2F8
943	6.42928e-64	0.393086	0.61	0.473	4.79625e-61	T1	MA0792.1	POU5F1B
944	1.10037e-62	0.423299	0.651	0.515	8.20875e-60	T1	MA0519.1	Stat5a::Stat5b
945	8.03001e-62	0.380133	0.607	0.47	5.99039e-59	T1	MA0789.1	POU3F4
946	3.87655e-61	0.365985	0.654	0.515	2.8919e-58	T1	MA1508.1	IKZF1
947	2.86221e-59	0.425217	0.639	0.503	2.13521e-56	T1	MA1525.1	NFATC4
948	4.45846e-59	0.340084	0.608	0.474	3.32601e-56	T1	MA0791.1	POU4F3
949	3.85868e-58	0.323197	0.596	0.466	2.87857e-55	T1	MA1471.1	BARX2
950	2.14412e-57	0.313214	0.641	0.498	1.59952e-54	T1	MA0872.1	TFAP2A(var.3)
951	1.09917e-56	0.350883	0.603	0.476	8.19982e-54	T1	MA0899.1	HOXA10
952	1.12823e-56	0.400354	0.636	0.512	8.41662e-54	T1	MA0101.1	REL
953	3.11397e-55	0.372255	0.627	0.509	2.32302e-52	T1	MA0767.1	GCM2
954	3.86693e-55	0.305979	0.641	0.497	2.88473e-52	T1	MA0813.1	TFAP2B(var.3)
955	4.10623e-55	0.343939	0.587	0.471	3.06325e-52	T1	MA1419.1	IRF4
956	7.84132e-55	0.334011	0.613	0.493	5.84962e-52	T1	MA0829.2	SREBF1(var.2)
957	2.88359e-54	0.344967	0.61	0.489	2.15116e-51	T1	MA0909.2	HOXD13
958	3.59266e-54	0.334322	0.617	0.507	2.68012e-51	T1	MA0822.1	HES7
959	1.5406e-53	0.353762	0.597	0.479	1.14929e-50	T1	MA0913.2	HOXD9
960	2.258e-53	0.315441	0.609	0.473	1.68447e-50	T1	MA0498.2	MEIS1
961	4.75301e-53	0.294219	0.621	0.48	3.54574e-50	T1	MA1651.1	ZFP42
962	7.3517e-52	0.283734	0.642	0.496	5.48437e-49	T1	MA0815.1	TFAP2C(var.3)
963	3.25839e-51	0.351425	0.614	0.497	2.43076e-48	T1	MA0463.2	BCL6
964	4.84742e-50	0.298896	0.64	0.517	3.61618e-47	T1	MA0080.5	SPI1
965	1.01082e-48	0.327034	0.592	0.478	7.54071e-46	T1	MA0040.1	Foxq1
966	1.66876e-48	0.294793	0.613	0.5	1.2449e-45	T1	MA0019.1	Ddit3::Cebpa
967	3.41981e-48	0.3342	0.623	0.51	2.55118e-45	T1	MA1557.1	SMAD5
968	5.97682e-48	0.362403	0.605	0.491	4.45871e-45	T1	MA0869.1	Sox11
969	6.35047e-48	0.31596	0.626	0.507	4.73745e-45	T1	MA0735.1	GLIS1
970	7.31108e-47	0.277073	0.63	0.511	5.45407e-44	T1	MA1652.1	ZKSCAN5
971	1.00865e-46	0.316657	0.589	0.473	7.52453e-44	T1	MA0051.1	IRF2
972	3.50163e-46	0.334558	0.61	0.486	2.61222e-43	T1	MA1639.1	MEIS1(var.2)
973	4.28721e-46	0.361339	0.622	0.509	3.19826e-43	T1	MA0137.3	STAT1
974	7.86055e-46	0.287913	0.601	0.493	5.86397e-43	T1	MA0694.1	ZBTB7B
975	1.31198e-45	0.295606	0.597	0.481	9.78741e-43	T1	MA0108.2	TBP
976	1.39335e-45	0.303131	0.589	0.467	1.03944e-42	T1	MA0786.1	POU3F1
977	1.80052e-45	0.250414	0.62	0.479	1.34319e-42	T1	MA0811.1	TFAP2B
978	3.10537e-45	0.309638	0.603	0.491	2.3166e-42	T1	MA1420.1	IRF5
979	1.77899e-44	0.313934	0.581	0.469	1.32713e-41	T1	MA0652.1	IRF8
980	2.6763e-44	0.327402	0.609	0.496	1.99652e-41	T1	MA0495.3	MAFF
981	2.61467e-43	0.30192	0.585	0.483	1.95054e-40	T1	MA0758.1	E2F7
982	4.52395e-43	0.311364	0.611	0.516	3.37487e-40	T1	MA0821.1	HES5
983	5.32526e-43	0.331474	0.622	0.508	3.97264e-40	T1	MA0819.1	CLOCK
984	6.40132e-43	0.323866	0.612	0.499	4.77539e-40	T1	MA0525.2	TP63
985	1.36051e-42	0.301982	0.598	0.485	1.01494e-39	T1	MA0070.1	PBX1
986	5.22035e-42	0.305733	0.596	0.493	3.89438e-39	T1	MA1118.1	SIX1
987	1.57726e-41	0.314129	0.617	0.499	1.17664e-38	T1	MA0038.2	GFI1
988	2.38966e-41	0.328435	0.628	0.523	1.78268e-38	T1	MA0104.4	MYCN
989	5.92029e-39	0.281218	0.579	0.473	4.41654e-36	T1	MA0468.1	DUX4
990	7.66279e-39	0.29578	0.583	0.483	5.71644e-36	T1	MA0907.1	HOXC13
991	2.02903e-38	0.3998	0.608	0.502	1.51366e-35	T1	MA0090.3	TEAD1
992	1.80863e-37	0.251642	0.591	0.483	1.34924e-34	T1	MA0517.1	STAT1::STAT2
993	5.9055e-37	0.278631	0.587	0.488	4.40551e-34	T1	MA1103.2	FOXK2
994	7.27288e-37	0.416663	0.647	0.532	5.42557e-34	T1	MA1155.1	ZSCAN4
995	8.00198e-36	0.260706	0.584	0.48	5.96948e-33	T1	MA0043.3	HLF
996	1.30306e-35	0.284959	0.581	0.483	9.72083e-33	T1	MA1115.1	POU5F1
997	3.0073e-34	0.262578	0.564	0.472	2.24345e-31	T1	MA0905.1	HOXC10
998	7.96462e-33	0.265462	0.603	0.499	5.9416e-30	T1	MA0479.1	FOXH1
999	1.84849e-31	0.255388	0.576	0.479	1.37897e-28	T1	MA0627.2	POU2F3
1000	4.56755e-30	0.306177	0.579	0.488	3.40739e-27	T1	MA0769.2	TCF7
1001	4.2541e-29	0.352399	0.598	0.498	3.17356e-26	T1	MA1121.1	TEAD2
1002	5.94965e-29	0.26787	0.601	0.515	4.43844e-26	T1	MA1602.1	ZSCAN29
1003	7.69292e-29	0.260783	0.612	0.519	5.73892e-26	T1	MA0825.1	MNT
1004	1.43312e-26	0.376662	0.64	0.533	1.06911e-23	T1	MA0510.2	RFX5
1005	1.33317e-24	0.314781	0.626	0.528	9.94545e-22	T1	MA0799.1	RFX4
1006	2.39414e-21	0.331284	0.636	0.532	1.78603e-18	T1	MA0600.2	RFX2
1007	4.26679e-21	0.250894	0.572	0.505	3.18303e-18	T1	MA0520.1	Stat6
1008	0	5.43719	0.883	0.391	0	T2	MA1109.1	NEUROD1
1009	0	5.39941	0.885	0.393	0	T2	MA1642.1	NEUROG2(var.2)
1010	0	4.74075	0.897	0.405	0	T2	MA1638.1	HAND2
1011	0	4.31436	0.889	0.408	0	T2	MA0091.1	TAL1::TCF3
1012	0	3.87431	0.915	0.446	0	T2	MA1467.1	ATOH1(var.2)
1013	0	3.86796	0.909	0.448	0	T2	MA1472.1	BHLHA15(var.2)
1014	0	3.82902	0.92	0.425	0	T2	MA1618.1	Ptf1a
1015	0	3.56169	0.917	0.466	0	T2	MA1641.1	MYF5
1016	0	3.49791	0.892	0.43	0	T2	MA1468.1	ATOH7
1017	0	3.37065	0.918	0.472	0	T2	MA1619.1	Ptf1a(var.2)
1018	0	3.23443	0.878	0.437	0	T2	MA1568.1	TCF21(var.2)
1019	0	3.20303	0.886	0.435	0	T2	MA0669.1	NEUROG2
1020	0	3.17159	0.902	0.442	0	T2	MA1123.2	TWIST1
1021	0	3.13561	0.907	0.487	0	T2	MA0500.2	MYOG
1022	0	3.08403	0.901	0.472	0	T2	MA0816.1	Ascl2
1023	0	2.96978	0.892	0.443	0	T2	MA0668.1	NEUROD2
1024	0	2.96858	0.915	0.461	0	T2	MA0521.1	Tcf12
1025	0	2.94317	0.899	0.456	0	T2	MA0832.1	Tcf21
1026	0	2.91941	0.898	0.455	0	T2	MA1485.1	FERD3L
1027	0	2.90347	0.903	0.483	0	T2	MA1100.2	ASCL1
1028	0	2.89156	0.899	0.447	0	T2	MA0623.2	NEUROG1
1029	0	2.86804	0.903	0.439	0	T2	MA0461.2	Atoh1
1030	0	2.76082	0.907	0.467	0	T2	MA0633.1	Twist2
1031	0	2.69078	0.911	0.495	0	T2	MA0048.2	NHLH1
1032	0	2.6808	0.898	0.444	0	T2	MA0826.1	OLIG1
1033	0	2.6417	0.91	0.509	0	T2	MA1635.1	BHLHE22(var.2)
1034	0	2.63874	0.903	0.457	0	T2	MA0607.1	Bhlha15
1035	0	2.61596	0.905	0.475	0	T2	MA0691.1	TFAP4
1036	0	2.60409	0.891	0.443	0	T2	MA0818.1	BHLHE22
1037	0	2.60256	0.895	0.441	0	T2	MA0827.1	OLIG3
1038	0	2.53243	0.891	0.442	0	T2	MA0678.1	OLIG2
1039	0	2.50203	0.891	0.469	0	T2	MA0665.1	MSC
1040	0	2.48955	0.893	0.446	0	T2	MA0817.1	BHLHE23
1041	0	2.43221	0.906	0.479	0	T2	MA0783.1	PKNOX2
1042	0	2.36665	0.898	0.468	0	T2	MA1524.1	MSGN1
1043	0	2.33534	0.89	0.464	0	T2	MA0667.1	MYF6
1044	0	2.32248	0.892	0.514	0	T2	MA1108.2	MXI1
1045	0	2.30984	0.902	0.478	0	T2	MA1529.1	NHLH2
1046	0	2.28503	0.902	0.475	0	T2	MA1571.1	TGIF2LX
1047	0	2.25121	0.9	0.474	0	T2	MA0797.1	TGIF2
1048	0	2.2372	0.906	0.474	0	T2	MA0796.1	TGIF1
1049	0	2.2094	0.899	0.475	0	T2	MA1572.1	TGIF2LY
1050	0	2.04542	0.894	0.485	0	T2	MA0499.2	MYOD1
1051	0	1.95593	0.894	0.484	0	T2	MA0698.1	ZBTB18
1052	0	1.88666	0.846	0.453	0	T2	MA1570.1	TFAP4(var.2)
1053	0	1.84968	0.891	0.504	0	T2	MA1593.1	ZNF317
1054	0	1.71692	0.907	0.524	0	T2	MA0798.2	RFX3
1055	0	1.68589	0.808	0.511	0	T2	MA1527.1	NFIC(var.2)
1056	0	1.68392	0.835	0.524	0	T2	MA0739.1	Hic1
1057	0	1.66208	0.803	0.51	0	T2	MA1528.1	NFIX(var.2)
1058	0	1.65248	0.85	0.491	0	T2	MA1150.1	RORB
1059	0	1.63809	0.881	0.517	0	T2	MA1655.1	ZNF341
1060	0	1.59813	0.86	0.486	0	T2	MA1151.1	RORC
1061	0	1.57016	0.904	0.464	0	T2	MA0811.1	TFAP2B
1062	0	1.566	0.878	0.52	0	T2	MA0510.2	RFX5
1063	0	1.56296	0.811	0.506	0	T2	MA1643.1	NFIB
1064	0	1.54529	0.872	0.52	0	T2	MA1155.1	ZSCAN4
1065	0	1.5416	0.884	0.514	0	T2	MA1116.1	RBPJ
1066	0	1.5399	0.886	0.511	0	T2	MA0513.1	SMAD2::SMAD3::SMAD4
1067	0	1.53032	0.913	0.441	0	T2	MA0003.4	TFAP2A
1068	0	1.52893	0.865	0.506	0	T2	MA0059.1	MAX::MYC
1069	0	1.51285	0.897	0.46	0	T2	MA0524.2	TFAP2C
1070	0	1.50797	0.875	0.519	0	T2	MA0600.2	RFX2
1071	0	1.47612	0.895	0.453	0	T2	MA0812.1	TFAP2B(var.2)
1072	0	1.47271	0.859	0.522	0	T2	MA0258.2	ESR2
1073	0	1.46789	0.888	0.516	0	T2	MA0154.4	EBF1
1074	0	1.4635	0.862	0.516	0	T2	MA0626.1	Npas2
1075	0	1.45383	0.86	0.5	0	T2	MA0093.3	USF1
1076	0	1.45309	0.79	0.51	0	T2	MA0119.1	NFIC::TLX1
1077	0	1.44596	0.873	0.51	0	T2	MA1647.1	PRDM4
1078	0	1.43752	0.856	0.511	0	T2	MA0106.3	TP53
1079	0	1.42767	0.851	0.517	0	T2	MA0597.1	THAP1
1080	0	1.4236	0.832	0.509	0	T2	MA0591.1	Bach1::Mafk
1081	0	1.41278	0.88	0.526	0	T2	MA0509.2	RFX1
1082	0	1.40943	0.857	0.459	0	T2	MA0774.1	MEIS2
1083	0	1.4004	0.867	0.507	0	T2	MA1601.1	ZNF75D
1084	0	1.39903	0.847	0.523	0	T2	MA0002.2	RUNX1
1085	0	1.39695	0.852	0.529	0	T2	MA1654.1	ZNF16
1086	0	1.39347	0.85	0.528	0	T2	MA0066.1	PPARG
1087	0	1.39088	0.844	0.486	0	T2	MA0071.1	RORA
1088	0	1.3883	0.868	0.502	0	T2	MA0147.3	MYC
1089	0	1.38646	0.86	0.512	0	T2	MA1628.1	Zic1::Zic2
1090	0	1.38023	0.844	0.512	0	T2	MA0596.1	SREBF2
1091	0	1.37348	0.865	0.506	0	T2	MA0825.1	MNT
1092	0	1.37128	0.86	0.497	0	T2	MA0526.3	USF2
1093	0	1.36841	0.861	0.517	0	T2	MA1629.1	Zic2
1094	0	1.3657	0.859	0.471	0	T2	MA0775.1	MEIS3
1095	0	1.36108	0.852	0.499	0	T2	MA0622.1	Mlxip
1096	0	1.35888	0.815	0.523	0	T2	MA0161.2	NFIC
1097	0	1.35415	0.865	0.515	0	T2	MA0799.1	RFX4
1098	0	1.35288	0.834	0.51	0	T2	MA0092.1	Hand1::Tcf3
1099	0	1.34883	0.844	0.502	0	T2	MA1521.1	MAFA
1100	0	1.34647	0.825	0.506	0	T2	MA0150.2	Nfe2l2
1101	0	1.34588	0.849	0.517	0	T2	MA1646.1	OSR2
1102	0	1.34384	0.86	0.507	0	T2	MA1114.1	PBX3
1103	0	1.32875	0.877	0.481	0	T2	MA0004.1	Arnt
1104	0	1.32257	0.863	0.498	0	T2	MA0058.3	MAX
1105	0	1.32083	0.877	0.514	0	T2	MA1637.1	EBF3
1106	0	1.31954	0.842	0.512	0	T2	MA0595.1	SREBF1
1107	0	1.31584	0.87	0.514	0	T2	MA1604.1	Ebf2
1108	0	1.31152	0.847	0.495	0	T2	MA0782.2	PKNOX1
1109	0	1.30694	0.822	0.499	0	T2	MA1520.1	MAF
1110	0	1.29694	0.871	0.441	0	T2	MA1569.1	TFAP2E
1111	0	1.29689	0.828	0.523	0	T2	MA0738.1	HIC2
1112	0	1.29353	0.807	0.497	0	T2	MA1633.1	BACH1
1113	0	1.27976	0.833	0.519	0	T2	MA1576.1	THRB(var.3)
1114	0	1.27923	0.843	0.512	0	T2	MA0104.4	MYCN
1115	0	1.27242	0.831	0.509	0	T2	MA0863.1	MTF1
1116	0	1.26253	0.832	0.511	0	T2	MA1532.1	NR1D2
1117	0	1.25906	0.845	0.508	0	T2	MA0807.1	TBX5
1118	0	1.25558	0.847	0.513	0	T2	MA0088.2	ZNF143
1119	0	1.25051	0.855	0.51	0	T2	MA1560.1	SOHLH2
1120	0	1.23775	0.875	0.485	0	T2	MA0813.1	TFAP2B(var.3)
1121	0	1.23682	0.876	0.44	0	T2	MA0810.1	TFAP2A(var.2)
1122	0	1.23131	0.834	0.511	0	T2	MA0503.1	Nkx2-5(var.2)
1123	0	1.22502	0.852	0.491	0	T2	MA1631.1	ASCL1(var.2)
1124	0	1.22148	0.852	0.516	0	T2	MA0138.2	REST
1125	0	1.2172	0.81	0.519	0	T2	MA1575.1	THRB(var.2)
1126	0	1.21352	0.833	0.533	0	T2	MA1600.1	ZNF684
1127	0	1.20882	0.822	0.51	0	T2	MA1592.1	ZNF274
1128	0	1.18935	0.845	0.513	0	T2	MA1620.1	Ptf1a(var.3)
1129	0	1.18518	0.829	0.513	0	T2	MA0801.1	MGA
1130	0	1.18518	0.829	0.513	0	T2	MA0803.1	TBX15
1131	0	1.16563	0.828	0.507	0	T2	MA0111.1	Spz1
1132	0	1.16014	0.856	0.487	0	T2	MA0872.1	TFAP2A(var.3)
1133	0	1.15915	0.816	0.51	0	T2	MA1566.1	TBX3
1134	0	1.15844	0.829	0.515	0	T2	MA1523.1	MSANTD3
1135	0	1.15714	0.852	0.468	0	T2	MA1651.1	ZFP42
1136	0	1.15677	0.799	0.505	0	T2	MA1110.1	NR1H4
1137	0	1.15612	0.807	0.483	0	T2	MA0072.1	RORA(var.2)
1138	0	1.14482	0.837	0.509	0	T2	MA1597.1	ZNF528
1139	0	1.13866	0.817	0.497	0	T2	MA0069.1	PAX6
1140	0	1.13634	0.816	0.509	0	T2	MA1539.1	NR2F6(var.3)
1141	0	1.1355	0.825	0.462	0	T2	MA0498.2	MEIS1
1142	0	1.12871	0.815	0.504	0	T2	MA0806.1	TBX4
1143	0	1.12524	0.837	0.528	0	T2	MA0116.1	Znf423
1144	0	1.1243	0.815	0.493	0	T2	MA0779.1	PAX1
1145	0	1.12013	0.812	0.483	0	T2	MA0141.3	ESRRB
1146	0	1.1185	0.822	0.51	0	T2	MA1594.1	ZNF382
1147	0	1.11552	0.846	0.513	0	T2	MA0065.2	Pparg::Rxra
1148	0	1.11179	0.806	0.514	0	T2	MA1535.1	NR2C1
1149	0	1.10915	0.816	0.495	0	T2	MA0781.1	PAX9
1150	0	1.10537	0.814	0.483	0	T2	MA0871.2	TFEC
1151	0	1.10299	0.839	0.51	0	T2	MA0062.3	GABPA
1152	0	1.10276	0.799	0.504	0	T2	MA0820.1	FIGLA
1153	0	1.1022	0.822	0.506	0	T2	MA0505.1	Nr5a2
1154	0	1.09987	0.876	0.424	0	T2	MA0814.2	TFAP2C(var.2)
1155	0	1.09951	0.812	0.508	0	T2	MA1538.1	NR2F1(var.3)
1156	0	1.09691	0.832	0.511	0	T2	MA0761.2	ETV1
1157	0	1.0958	0.828	0.497	0	T2	MA0823.1	HEY1
1158	0	1.09235	0.79	0.495	0	T2	MA0501.1	MAF::NFE2
1159	0	1.08076	0.847	0.485	0	T2	MA0815.1	TFAP2C(var.3)
1160	0	1.07758	0.8	0.498	0	T2	MA0819.1	CLOCK
1161	0	1.07442	0.807	0.506	0	T2	MA0861.1	TP73
1162	0	1.0686	0.814	0.502	0	T2	MA0608.1	Creb3l2
1163	0	1.06735	0.794	0.496	0	T2	MA0688.1	TBX2
1164	0	1.06229	0.804	0.502	0	T2	MA0677.1	Nr2f6
1165	0	1.05758	0.801	0.513	0	T2	MA1645.1	NKX2-2
1166	0	1.05274	0.797	0.52	0	T2	MA1153.1	Smad4
1167	0	1.05152	0.795	0.497	0	T2	MA0160.1	NR4A2
1168	0	1.05085	0.826	0.506	0	T2	MA1565.1	TBX18
1169	0	1.04982	0.802	0.499	0	T2	MA1540.1	NR5A1
1170	0	1.04504	0.856	0.526	0	T2	MA0155.1	INSM1
1171	0	1.04168	0.787	0.494	0	T2	MA0800.1	EOMES
1172	0	1.03155	0.791	0.488	0	T2	MA0592.3	ESRRA
1173	0	1.0292	0.828	0.524	0	T2	MA0734.2	GLI2
1174	0	1.0281	0.792	0.51	0	T2	MA1567.1	TBX6
1175	0	1.0271	0.829	0.495	0	T2	MA0830.2	TCF4
1176	0	1.02453	0.804	0.482	0	T2	MA0831.2	TFE3
1177	0	1.02328	0.831	0.524	0	T2	MA1491.1	GLI3
1178	0	1.02079	0.829	0.508	0	T2	MA1558.1	SNAI1
1179	0	1.01941	0.794	0.483	0	T2	MA0643.1	Esrrg
1180	0	1.01689	0.782	0.496	0	T2	MA0009.2	TBXT
1181	0	1.01614	0.834	0.51	0	T2	MA0473.3	ELF1
1182	0	1.01488	0.799	0.499	0	T2	MA0689.1	TBX20
1183	0	1.01144	0.789	0.511	0	T2	MA0159.1	RARA::RXRA
1184	0	1.00877	0.811	0.497	0	T2	MA0649.1	HEY2
1185	0	1.006	0.825	0.494	0	T2	MA0483.1	Gfi1b
1186	0	1.00267	0.81	0.507	0	T2	MA0139.1	CTCF
1187	0	1.0013	0.797	0.466	0	T2	MA1112.2	NR4A1
1188	0	0.99827	0.832	0.442	0	T2	MA0006.1	Ahr::Arnt
1189	0	0.995054	0.804	0.495	0	T2	MA1148.1	PPARA::RXRA
1190	0	0.992994	0.817	0.516	0	T2	MA1621.1	Rbpjl
1191	0	0.988473	0.802	0.513	0	T2	MA1559.1	SNAI3
1192	0	0.985319	0.795	0.483	0	T2	MA0692.1	TFEB
1193	0	0.980389	0.784	0.499	0	T2	MA0690.1	TBX21
1194	0	0.977254	0.792	0.515	0	T2	MA1531.1	NR1D1
1195	0	0.976622	0.82	0.512	0	T2	MA0640.2	ELF3
1196	0	0.967801	0.794	0.475	0	T2	MA1464.1	ARNT2
1197	0	0.966637	0.823	0.501	0	T2	MA0598.3	EHF
1198	0	0.963072	0.812	0.503	0	T2	MA0502.2	NFYB
1199	0	0.959889	0.806	0.497	0	T2	MA0480.1	Foxo1
1200	0	0.956438	0.802	0.489	0	T2	MA1583.1	ZFP57
1201	0	0.9529	0.811	0.492	0	T2	MA1616.1	Prdm15
1202	0	0.949029	0.823	0.518	0	T2	MA0764.2	ETV4
1203	0	0.941017	0.789	0.48	0	T2	MA0464.2	BHLHE40
1204	0	0.930139	0.813	0.51	0	T2	MA0057.1	MZF1(var.2)
1205	0	0.923656	0.803	0.498	0	T2	MA1648.1	TCF12(var.2)
1206	0	0.921962	0.788	0.506	0	T2	MA0821.1	HES5
1207	0	0.921768	0.805	0.5	0	T2	MA0522.3	TCF3
1208	0	0.916824	0.787	0.505	0	T2	MA1493.1	HES6
1209	0	0.904411	0.775	0.476	0	T2	MA0603.1	Arntl
1210	0	0.829297	0.833	0.5	0	T2	MA1652.1	ZKSCAN5
1211	0	0.825814	0.812	0.511	0	T2	MA1615.1	Plagl1
1212	0	0.781789	0.811	0.514	0	T2	MA1514.1	KLF17
1213	0	0.752675	0.814	0.492	0	T2	MA0130.1	ZNF354C
1214	0	0.711287	0.806	0.493	0	T2	MA1630.1	Znf281
1215	0	0.612735	0.808	0.49	0	T2	MA1522.1	MAZ
1216	6.07696e-308	0.99213	0.785	0.496	4.53341e-305	T2	MA0802.1	TBR1
1217	1.10441e-304	0.654759	0.801	0.499	8.23887e-302	T2	MA0073.1	RREB1
1218	7.02012e-302	0.959304	0.777	0.502	5.23701e-299	T2	MA0063.2	NKX2-5
1219	7.50992e-300	0.988668	0.795	0.524	5.6024e-297	T2	MA0737.1	GLIS3
1220	3.98824e-299	0.968998	0.785	0.508	2.97523e-296	T2	MA1147.1	NR4A2::RXRA
1221	1.49778e-298	0.915187	0.789	0.522	1.11734e-295	T2	MA1656.1	ZNF449
1222	4.13605e-297	0.764882	0.779	0.513	3.08549e-294	T2	MA1581.1	ZBTB6
1223	2.59351e-295	0.807241	0.782	0.495	1.93476e-292	T2	MA0657.1	KLF13
1224	1.96928e-294	0.938648	0.782	0.49	1.46908e-291	T2	MA0525.2	TP63
1225	8.05231e-292	0.949489	0.78	0.477	6.00702e-289	T2	MA0507.1	POU2F2
1226	1.43345e-291	0.944948	0.775	0.48	1.06935e-288	T2	MA1111.1	NR2F2
1227	7.02045e-291	0.53536	0.791	0.48	5.23725e-288	T2	MA1627.1	Wt1
1228	1.97629e-290	0.968236	0.791	0.507	1.47431e-287	T2	MA1146.1	NR1H4::RXRA
1229	2.76623e-290	0.859099	0.774	0.492	2.06361e-287	T2	MA0752.1	ZNF410
1230	6.87053e-289	0.548587	0.789	0.481	5.12541e-286	T2	MA1107.2	KLF9
1231	1.93134e-288	0.919987	0.78	0.506	1.44078e-285	T2	MA1537.1	NR2F1(var.2)
1232	8.05981e-288	0.912838	0.781	0.499	6.01261e-285	T2	MA0839.1	CREB3L1
1233	1.222e-282	0.707118	0.776	0.504	9.11615e-280	T2	MA0103.3	ZEB1
1234	4.82043e-282	0.868774	0.78	0.498	3.59604e-279	T2	MA0512.2	Rxra
1235	1.95246e-280	0.880396	0.796	0.503	1.45654e-277	T2	MA1578.1	VEZF1
1236	4.41447e-280	1.05255	0.786	0.494	3.2932e-277	T2	MA0089.2	NFE2L1
1237	5.2222e-280	0.574088	0.778	0.497	3.89576e-277	T2	MA0528.2	ZNF263
1238	1.14373e-278	0.721826	0.774	0.496	8.53219e-276	T2	MA0504.1	NR2C2
1239	9.35181e-278	0.875016	0.789	0.51	6.97645e-275	T2	MA1589.1	ZNF140
1240	2.26876e-277	0.927788	0.777	0.502	1.6925e-274	T2	MA0100.3	MYB
1241	4.23867e-276	0.812579	0.8	0.508	3.16205e-273	T2	MA1508.1	IKZF1
1242	3.87241e-275	0.95641	0.774	0.496	2.88882e-272	T2	MA0659.2	MAFG
1243	3.8534e-274	0.941452	0.794	0.516	2.87464e-271	T2	MA0144.2	STAT3
1244	4.0908e-274	0.857267	0.774	0.466	3.05174e-271	T2	MA0790.1	POU4F1
1245	1.0692e-273	0.880666	0.786	0.49	7.97626e-271	T2	MA0038.2	GFI1
1246	1.17387e-273	0.723172	0.787	0.52	8.75704e-271	T2	MA1599.1	ZNF682
1247	1.70924e-273	1.17447	0.777	0.509	1.27509e-270	T2	MA0671.1	NFIX
1248	2.84576e-271	0.612243	0.787	0.487	2.12294e-268	T2	MA0753.2	ZNF740
1249	7.52521e-268	0.94207	0.793	0.51	5.6138e-265	T2	MA1625.1	Stat5b
1250	1.99313e-265	0.863294	0.768	0.469	1.48688e-262	T2	MA0627.2	POU2F3
1251	4.09324e-263	0.87386	0.774	0.5	3.05355e-260	T2	MA0115.1	NR1H2::RXRA
1252	5.35987e-263	0.879755	0.768	0.499	3.99846e-260	T2	MA1542.1	OSR1
1253	1.12383e-262	0.835926	0.769	0.518	8.38374e-260	T2	MA0745.2	SNAI2
1254	1.17229e-262	0.920053	0.78	0.515	8.74529e-260	T2	MA1649.1	ZBTB12
1255	7.26771e-262	0.807706	0.742	0.461	5.42171e-259	T2	MA0788.1	POU3F3
1256	1.3195e-260	0.843487	0.757	0.501	9.84348e-258	T2	MA0856.1	RXRG
1257	1.38385e-260	1.10831	0.785	0.504	1.03235e-257	T2	MA0078.1	Sox17
1258	2.36076e-260	0.84918	0.765	0.507	1.76113e-257	T2	MA1556.1	RXRG(var.2)
1259	4.25272e-260	0.87474	0.755	0.467	3.17253e-257	T2	MA0787.1	POU3F2
1260	1.54194e-259	0.941224	0.765	0.514	1.15029e-256	T2	MA0646.1	GCM1
1261	1.90507e-257	0.601381	0.791	0.503	1.42118e-254	T2	MA0149.1	EWSR1-FLI1
1262	8.6707e-257	0.827634	0.759	0.467	6.46834e-254	T2	MA0791.1	POU4F3
1263	1.78944e-256	0.916663	0.761	0.504	1.33492e-253	T2	MA0114.4	HNF4A
1264	1.92095e-256	0.865582	0.766	0.502	1.43303e-253	T2	MA0056.2	MZF1
1265	6.64243e-256	0.929092	0.766	0.507	4.95525e-253	T2	MA0484.2	HNF4G
1266	3.21823e-255	0.546734	0.758	0.494	2.4008e-252	T2	MA0163.1	PLAG1
1267	8.51917e-255	0.869449	0.746	0.466	6.3553e-252	T2	MA0792.1	POU5F1B
1268	1.22351e-252	1.00052	0.767	0.521	9.12739e-250	T2	MA0730.1	RARA(var.2)
1269	3.15155e-251	0.77502	0.766	0.499	2.35105e-248	T2	MA0696.1	ZIC1
1270	7.19078e-251	0.870839	0.785	0.508	5.36432e-248	T2	MA0519.1	Stat5a::Stat5b
1271	3.97092e-249	0.872224	0.756	0.492	2.96231e-246	T2	MA1536.1	NR2C2(var.2)
1272	4.41479e-248	0.799816	0.746	0.472	3.29343e-245	T2	MA0610.1	DMRT3
1273	4.29841e-247	0.949417	0.773	0.516	3.20661e-244	T2	MA0007.3	Ar
1274	1.17392e-246	0.782194	0.76	0.499	8.75745e-244	T2	MA0822.1	HES7
1275	1.57825e-246	0.781146	0.749	0.48	1.17737e-243	T2	MA0620.3	MITF
1276	1.62208e-245	0.830987	0.756	0.471	1.21007e-242	T2	MA0683.1	POU4F2
1277	2.27094e-245	0.802065	0.731	0.46	1.69412e-242	T2	MA0786.1	POU3F1
1278	5.91186e-244	0.919873	0.761	0.51	4.41025e-241	T2	MA0113.3	NR3C1
1279	1.11869e-242	0.796083	0.766	0.503	8.34543e-240	T2	MA0259.1	ARNT::HIF1A
1280	2.61145e-242	0.854706	0.782	0.505	1.94814e-239	T2	MA0107.1	RELA
1281	4.45087e-240	0.790001	0.758	0.5	3.32035e-237	T2	MA0855.1	RXRB
1282	7.13692e-240	0.708868	0.8	0.51	5.32415e-237	T2	MA0081.2	SPIB
1283	9.88289e-240	0.838037	0.751	0.474	7.37263e-237	T2	MA1115.1	POU5F1
1284	3.57445e-238	0.866312	0.762	0.494	2.66654e-235	T2	MA0117.2	Mafb
1285	6.54522e-238	0.78593	0.724	0.46	4.88274e-235	T2	MA0785.1	POU2F1
1286	2.53989e-236	0.679222	0.764	0.513	1.89476e-233	T2	MA1573.1	THAP11
1287	8.36085e-235	0.766852	0.758	0.511	6.23719e-232	T2	MA0112.3	ESR1
1288	1.67409e-234	0.819648	0.755	0.503	1.24887e-231	T2	MA0074.1	RXRA::VDR
1289	2.7831e-234	0.878816	0.771	0.516	2.0762e-231	T2	MA1579.1	ZBTB26
1290	2.11605e-233	0.853562	0.762	0.522	1.57857e-230	T2	MA0860.1	Rarg(var.2)
1291	3.14136e-233	0.731563	0.766	0.509	2.34345e-230	T2	MA0736.1	GLIS2
1292	5.83513e-233	0.769459	0.75	0.501	4.35301e-230	T2	MA1550.1	PPARD
1293	3.09226e-232	0.891673	0.768	0.508	2.30682e-229	T2	MA1117.1	RELB
1294	1.88664e-231	0.827237	0.741	0.505	1.40743e-228	T2	MA0805.1	TBX1
1295	2.07589e-231	0.780827	0.752	0.502	1.54861e-228	T2	MA1533.1	NR1I2
1296	9.27136e-231	0.789318	0.767	0.507	6.91644e-228	T2	MA1106.1	HIF1A
1297	4.82611e-230	0.837828	0.772	0.505	3.60028e-227	T2	MA0101.1	REL
1298	6.33666e-230	0.796423	0.73	0.47	4.72715e-227	T2	MA0784.1	POU1F1
1299	1.31228e-229	0.800454	0.746	0.504	9.78961e-227	T2	MA1552.1	RARB(var.3)
1300	1.74523e-229	0.764286	0.752	0.492	1.30194e-226	T2	MA0067.1	Pax2
1301	2.33857e-228	0.95901	0.759	0.514	1.74457e-225	T2	MA0858.1	Rarb(var.2)
1302	2.58091e-228	0.721047	0.735	0.482	1.92536e-225	T2	MA0616.2	HES2
1303	6.48026e-227	0.775303	0.747	0.503	4.83427e-224	T2	MA1574.1	THRB
1304	4.55913e-226	0.897502	0.788	0.516	3.40111e-223	T2	MA1124.1	ZNF24
1305	1.03708e-223	0.574265	0.74	0.499	7.7366e-221	T2	MA0493.1	Klf1
1306	4.15473e-223	0.786246	0.747	0.473	3.09943e-220	T2	MA0606.1	NFAT5
1307	7.65314e-221	0.801019	0.762	0.512	5.70924e-218	T2	MA1154.1	ZNF282
1308	1.29177e-219	0.669376	0.728	0.478	9.6366e-217	T2	MA0095.2	YY1
1309	8.87896e-218	0.80466	0.765	0.506	6.6237e-215	T2	MA1602.1	ZSCAN29
1310	3.52074e-217	0.790046	0.735	0.503	2.62647e-214	T2	MA1553.1	RARG(var.3)
1311	5.79516e-217	0.831759	0.775	0.496	4.32319e-214	T2	MA1525.1	NFATC4
1312	4.29397e-216	0.780784	0.761	0.505	3.2033e-213	T2	MA0508.3	PRDM1
1313	4.71348e-214	0.78448	0.765	0.507	3.51626e-211	T2	MA0518.1	Stat4
1314	1.6971e-213	0.76384	0.721	0.465	1.26604e-210	T2	MA0789.1	POU3F4
1315	1.15528e-208	0.773037	0.736	0.5	8.61838e-206	T2	MA1541.1	NR6A1
1316	2.67968e-207	0.743006	0.735	0.492	1.99904e-204	T2	MA0479.1	FOXH1
1317	6.13283e-207	0.745958	0.735	0.507	4.57509e-204	T2	MA1555.1	RXRB(var.2)
1318	1.72477e-204	0.754804	0.743	0.506	1.28668e-201	T2	MA0795.1	SMAD3
1319	3.73554e-203	0.809178	0.745	0.498	2.78671e-200	T2	MA0870.1	Sox1
1320	4.37133e-203	0.782002	0.773	0.531	3.26101e-200	T2	MA1548.1	PLAGL2
1321	4.69715e-202	0.702056	0.75	0.485	3.50407e-199	T2	MA0152.1	NFATC2
1322	1.70418e-201	0.751648	0.742	0.503	1.27132e-198	T2	MA0767.1	GCM2
1323	9.6826e-201	0.783231	0.745	0.48	7.22322e-198	T2	MA1639.1	MEIS1(var.2)
1324	2.46276e-198	0.811613	0.748	0.52	1.83722e-195	T2	MA1149.1	RARA::RXRG
1325	9.74924e-198	0.742365	0.733	0.495	7.27293e-195	T2	MA0511.2	RUNX2
1326	6.02155e-196	0.833488	0.765	0.51	4.49208e-193	T2	MA0488.1	JUN
1327	4.937e-195	0.796844	0.742	0.509	3.683e-192	T2	MA0727.1	NR3C2
1328	5.05113e-194	0.935868	0.752	0.505	3.76814e-191	T2	MA0670.1	NFIA
1329	2.26366e-192	0.710273	0.751	0.497	1.68869e-189	T2	MA1554.1	RFX7
1330	8.94023e-192	0.660074	0.732	0.486	6.66941e-189	T2	MA1474.1	CREB3L4
1331	1.14888e-191	0.59218	0.775	0.51	8.57066e-189	T2	MA0080.5	SPI1
1332	2.61859e-191	0.633282	0.727	0.488	1.95347e-188	T2	MA0014.3	PAX5
1333	3.57218e-191	0.740082	0.711	0.49	2.66485e-188	T2	MA0804.1	TBX19
1334	2.6551e-190	0.840129	0.733	0.476	1.9807e-187	T2	MA1622.1	Smad2::Smad3
1335	1.42605e-189	0.663369	0.712	0.476	1.06383e-186	T2	MA0636.1	BHLHE41
1336	1.47562e-188	0.698275	0.733	0.517	1.10081e-185	T2	MA0494.1	Nr1h3::Rxra
1337	1.40167e-187	0.704465	0.73	0.504	1.04565e-184	T2	MA1557.1	SMAD5
1338	3.90854e-186	0.721108	0.725	0.478	2.91577e-183	T2	MA0070.1	PBX1
1339	2.31357e-185	0.811528	0.73	0.505	1.72592e-182	T2	MA0771.1	HSF4
1340	4.18739e-183	0.635302	0.722	0.499	3.12379e-180	T2	MA0751.1	ZIC4
1341	6.734e-183	0.797228	0.744	0.496	5.02357e-180	T2	MA0018.4	CREB1
1342	1.70638e-180	0.439931	0.711	0.474	1.27296e-177	T2	MA1511.1	KLF10
1343	1.1389e-179	0.327548	0.718	0.466	8.4962e-177	T2	MA1653.1	ZNF148
1344	1.35102e-179	0.723839	0.743	0.506	1.00786e-176	T2	MA1624.1	Stat5a
1345	4.05911e-175	0.71285	0.737	0.503	3.0281e-172	T2	MA0164.1	Nr2e3
1346	4.42583e-175	0.651906	0.715	0.496	3.30167e-172	T2	MA0037.3	GATA3
1347	4.68657e-173	0.384423	0.695	0.468	3.49618e-170	T2	MA0516.2	SP2
1348	2.36064e-172	0.41369	0.704	0.479	1.76103e-169	T2	MA1102.2	CTCFL
1349	2.89926e-172	0.76122	0.71	0.469	2.16285e-169	T2	MA0835.2	BATF3
1350	6.38231e-172	0.762756	0.705	0.468	4.7612e-169	T2	MA1634.1	BATF
1351	8.10694e-171	0.696859	0.724	0.498	6.04778e-168	T2	MA0673.1	NKX2-8
1352	8.75648e-171	0.695797	0.732	0.49	6.53234e-168	T2	MA0495.3	MAFF
1353	1.11933e-168	0.627496	0.723	0.489	8.35022e-166	T2	MA1466.1	ATF6
1354	2.34527e-168	0.647613	0.713	0.481	1.74957e-165	T2	MA0865.1	E2F8
1355	1.30433e-166	0.725636	0.725	0.498	9.73028e-164	T2	MA0842.2	NRL
1356	4.46858e-165	0.575385	0.713	0.489	3.33356e-162	T2	MA0697.1	ZIC3
1357	1.44015e-163	0.678096	0.718	0.504	1.07435e-160	T2	MA0140.2	GATA1::TAL1
1358	2.01449e-163	0.675786	0.714	0.509	1.50281e-160	T2	MA1585.1	ZKSCAN1
1359	2.26133e-163	0.339245	0.69	0.459	1.68695e-160	T2	MA0741.1	KLF16
1360	1.98004e-162	0.739768	0.698	0.468	1.47711e-159	T2	MA0462.2	BATF::JUN
1361	1.8583e-161	0.663177	0.709	0.475	1.38629e-158	T2	MA0625.1	NFATC3
1362	1.01167e-160	0.592691	0.708	0.51	7.54708e-158	T2	MA0496.3	MAFK
1363	1.51739e-159	0.665752	0.714	0.497	1.13197e-156	T2	MA0731.1	BCL6B
1364	9.60549e-156	0.632675	0.711	0.494	7.1657e-153	T2	MA1119.1	SIX2
1365	2.25512e-155	0.751527	0.708	0.48	1.68232e-152	T2	MA0841.1	NFE2
1366	2.99546e-155	0.523	0.727	0.494	2.23461e-152	T2	MA1623.1	Stat2
1367	4.31673e-155	0.719481	0.703	0.474	3.22028e-152	T2	MA1101.2	BACH2
1368	3.47765e-154	0.605022	0.681	0.478	2.59433e-151	T2	MA0758.1	E2F7
1369	5.26437e-154	0.652185	0.719	0.492	3.92722e-151	T2	MA0463.2	BCL6
1370	6.75141e-154	0.529087	0.704	0.464	5.03655e-151	T2	MA0845.1	FOXB1
1371	1.77268e-153	0.292633	0.677	0.463	1.32242e-150	T2	MA0599.1	KLF5
1372	1.88066e-153	0.71049	0.72	0.503	1.40297e-150	T2	MA1608.1	Isl1
1373	8.63334e-153	0.513818	0.71	0.493	6.44047e-150	T2	MA0645.1	ETV6
1374	5.41224e-152	0.582119	0.685	0.48	4.03753e-149	T2	MA0663.1	MLX
1375	2.0363e-151	0.662942	0.704	0.49	1.51908e-148	T2	MA0866.1	SOX21
1376	5.31039e-150	0.750963	0.695	0.48	3.96155e-147	T2	MA0478.1	FOSL2
1377	3.76135e-148	0.598705	0.691	0.474	2.80597e-145	T2	MA0650.2	HOXA13
1378	6.52576e-147	0.657339	0.719	0.497	4.86822e-144	T2	MA0520.1	Stat6
1379	8.54411e-147	0.609461	0.7	0.476	6.37391e-144	T2	MA0833.2	ATF4
1380	3.03895e-145	0.712429	0.699	0.469	2.26706e-142	T2	MA0099.3	FOS::JUN
1381	8.73947e-145	0.626093	0.694	0.474	6.51964e-142	T2	MA0624.1	NFATC1
1382	1.90526e-144	0.574949	0.689	0.48	1.42132e-141	T2	MA0102.4	CEBPA
1383	8.04023e-144	0.711259	0.715	0.494	5.99801e-141	T2	MA0142.1	Pou5f1::Sox2
1384	1.10614e-142	0.606784	0.701	0.503	8.25183e-140	T2	MA0766.2	GATA5
1385	7.13514e-142	0.677197	0.692	0.467	5.32281e-139	T2	MA0476.1	FOS
1386	2.02327e-141	0.3346	0.689	0.497	1.50936e-138	T2	MA0146.2	Zfx
1387	3.7089e-137	0.690557	0.686	0.467	2.76684e-134	T2	MA1128.1	FOSL1::JUN
1388	4.84684e-137	0.589217	0.708	0.503	3.61574e-134	T2	MA1494.1	HNF4A(var.2)
1389	3.00837e-136	0.624941	0.72	0.504	2.24424e-133	T2	MA0137.3	STAT1
1390	1.52907e-135	0.664625	0.718	0.504	1.14068e-132	T2	MA1632.1	ATF2
1391	1.58862e-135	0.667763	0.709	0.507	1.18511e-132	T2	MA0486.2	HSF1
1392	3.05533e-135	0.643165	0.683	0.467	2.27928e-132	T2	MA0490.2	JUNB
1393	6.63213e-134	0.535864	0.705	0.514	4.94757e-131	T2	MA0778.1	NFKB2
1394	8.07618e-134	0.640315	0.708	0.499	6.02483e-131	T2	MA0770.1	HSF2
1395	8.64191e-134	0.584752	0.711	0.492	6.44686e-131	T2	MA0593.1	FOXP2
1396	3.88038e-133	0.534586	0.681	0.497	2.89476e-130	T2	MA0019.1	Ddit3::Cebpa
1397	7.91962e-133	0.548145	0.683	0.481	5.90804e-130	T2	MA1105.2	GRHL2
1398	8.12235e-133	0.664945	0.682	0.47	6.05927e-130	T2	MA1135.1	FOSB::JUNB
1399	1.2031e-131	0.670967	0.694	0.474	8.97514e-129	T2	MA0489.1	JUN(var.2)
1400	6.93578e-131	0.608296	0.7	0.486	5.17409e-128	T2	MA0869.1	Sox11
1401	1.58975e-130	0.55168	0.676	0.464	1.18595e-127	T2	MA0676.1	Nr2e1
1402	1.75736e-130	0.567746	0.688	0.477	1.31099e-127	T2	MA1113.2	PBX2
1403	7.20551e-128	0.69712	0.694	0.48	5.37531e-125	T2	MA0879.1	Dlx1
1404	1.06597e-127	0.644975	0.687	0.469	7.9521e-125	T2	MA0477.2	FOSL1
1405	1.90714e-125	0.613666	0.677	0.464	1.42273e-122	T2	MA0491.2	JUND
1406	4.20245e-125	0.637233	0.669	0.466	3.13502e-122	T2	MA1142.1	FOSL1::JUND
1407	4.7157e-125	0.52169	0.668	0.477	3.51791e-122	T2	MA0664.1	MLXIPL
1408	7.08179e-125	0.455677	0.678	0.485	5.28301e-122	T2	MA0136.2	ELF5
1409	2.65856e-124	0.539439	0.705	0.503	1.98329e-121	T2	MA0735.1	GLIS1
1410	8.66099e-124	0.561219	0.688	0.503	6.4611e-121	T2	MA0083.3	SRF
1411	2.06342e-121	0.6298	0.676	0.475	1.53931e-118	T2	MA0880.1	Dlx3
1412	2.13534e-121	0.630382	0.678	0.471	1.59297e-118	T2	MA1132.1	JUN::JUNB
1413	7.644e-121	0.574507	0.685	0.504	5.70243e-118	T2	MA0693.2	VDR
1414	1.72519e-120	0.509986	0.682	0.492	1.28699e-117	T2	MA1588.1	ZNF136
1415	8.3913e-120	0.595319	0.694	0.491	6.25991e-117	T2	MA1496.1	HOXA4
1416	1.26111e-119	0.617594	0.698	0.504	9.40785e-117	T2	MA0492.1	JUND(var.2)
1417	4.32074e-119	0.489452	0.681	0.49	3.22327e-116	T2	MA0687.1	SPIC
1418	1.66593e-118	0.62297	0.665	0.466	1.24278e-115	T2	MA1134.1	FOS::JUNB
1419	3.6227e-116	0.447316	0.67	0.49	2.70253e-113	T2	MA1584.1	ZIC5
1420	4.28341e-116	0.619808	0.676	0.469	3.19542e-113	T2	MA1141.1	FOS::JUND
1421	4.0925e-115	0.625795	0.672	0.468	3.053e-112	T2	MA1130.1	FOSL2::JUN
1422	4.28145e-114	0.463971	0.645	0.451	3.19396e-111	T2	MA0602.1	Arid5a
1423	5.58172e-114	0.497097	0.665	0.47	4.16397e-111	T2	MA0051.1	IRF2
1424	7.86761e-114	0.517998	0.671	0.496	5.86924e-111	T2	MA0482.2	GATA4
1425	1.83096e-113	0.740169	0.687	0.488	1.36589e-110	T2	MA0642.1	EN2
1426	2.93794e-113	0.736525	0.697	0.49	2.19171e-110	T2	MA0894.1	HESX1
1427	1.15375e-112	0.549894	0.673	0.484	8.60695e-110	T2	MA0836.2	CEBPD
1428	7.04953e-111	0.526877	0.684	0.495	5.25895e-108	T2	MA0684.2	RUNX3
1429	3.06581e-110	0.304352	0.642	0.457	2.2871e-107	T2	MA0471.2	E2F6
1430	3.37308e-109	0.303463	0.646	0.467	2.51632e-106	T2	MA0747.1	SP8
1431	2.88526e-108	0.509261	0.664	0.49	2.1524e-105	T2	MA0829.2	SREBF1(var.2)
1432	2.36337e-107	0.42643	0.661	0.49	1.76307e-104	T2	MA0765.2	ETV5
1433	9.04684e-107	0.559256	0.668	0.491	6.74895e-104	T2	MA1421.1	TCF7L1
1434	2.64125e-105	0.400876	0.669	0.478	1.97037e-102	T2	MA0733.1	EGR4
1435	6.32466e-105	0.474256	0.658	0.481	4.71819e-102	T2	MA0828.1	SREBF2(var.2)
1436	6.8029e-104	0.449421	0.646	0.47	5.07496e-101	T2	MA0611.1	Dux
1437	1.54196e-103	0.864917	0.719	0.511	1.1503e-100	T2	MA0515.1	Sox6
1438	2.23941e-103	0.473158	0.661	0.478	1.6706e-100	T2	MA1470.1	BACH2(var.2)
1439	5.50789e-103	0.318706	0.584	0.404	4.10889e-100	T2	MA0679.2	ONECUT1
1440	6.98006e-103	0.455534	0.662	0.481	5.20713e-100	T2	MA0794.1	PROX1
1441	2.81107e-102	0.503394	0.66	0.49	2.09706e-99	T2	MA1118.1	SIX1
1442	1.08553e-101	0.4477	0.673	0.489	8.09803e-99	T2	MA1644.1	NFYC
1443	1.14842e-100	0.473125	0.663	0.475	8.56719e-98	T2	MA0465.2	CDX2
1444	5.16979e-99	0.718009	0.72	0.521	3.85666e-96	T2	MA1563.1	SOX18
1445	6.08806e-99	0.458572	0.664	0.488	4.54169e-96	T2	MA0638.1	CREB3
1446	3.47169e-98	0.442396	0.69	0.516	2.58988e-95	T2	MA0105.4	NFKB1
1447	5.86034e-97	0.55379	0.649	0.467	4.37181e-94	T2	MA1144.1	FOSL2::JUND
1448	9.47068e-97	0.546876	0.663	0.488	7.06513e-94	T2	MA1507.1	HOXD4
1449	1.58452e-95	0.453787	0.669	0.494	1.18205e-92	T2	MA0844.1	XBP1
1450	3.397e-95	0.441555	0.654	0.488	2.53416e-92	T2	MA0631.1	Six3
1451	1.04373e-93	0.527628	0.664	0.487	7.78621e-91	T2	MA1499.1	HOXB4
1452	1.8181e-93	0.465923	0.642	0.48	1.3563e-90	T2	MA0108.2	TBP
1453	7.90302e-93	0.63485	0.657	0.485	5.89565e-90	T2	MA0912.2	HOXD3
1454	4.44494e-92	0.49965	0.676	0.503	3.31592e-89	T2	MA1487.1	FOXE1
1455	8.7453e-92	0.337529	0.66	0.488	6.524e-89	T2	MA0750.2	ZBTB7A
1456	1.66233e-91	0.520771	0.639	0.463	1.2401e-88	T2	MA1137.1	FOSL1::JUNB
1457	2.28363e-91	0.448353	0.656	0.487	1.70359e-88	T2	MA0909.2	HOXD13
1458	5.35161e-91	0.462966	0.677	0.49	3.9923e-88	T2	MA1418.1	IRF3
1459	8.67228e-91	0.652764	0.667	0.481	6.46952e-88	T2	MA0666.1	MSX1
1460	9.30591e-91	0.579727	0.669	0.487	6.94221e-88	T2	MA1518.1	LHX1
1461	1.60841e-90	0.386162	0.642	0.464	1.19987e-87	T2	MA0901.2	HOXB13
1462	6.95774e-90	0.583632	0.652	0.481	5.19047e-87	T2	MA0887.1	EVX1
1463	9.6817e-90	0.512171	0.638	0.463	7.22255e-87	T2	MA1138.1	FOSL2::JUNB
1464	1.24812e-89	0.423771	0.648	0.481	9.31101e-87	T2	MA0047.3	FOXA2
1465	9.3797e-88	0.461753	0.644	0.476	6.99726e-85	T2	MA0878.2	CDX1
1466	3.30994e-87	0.452654	0.65	0.489	2.46922e-84	T2	MA1420.1	IRF5
1467	3.41154e-86	0.415341	0.631	0.467	2.54501e-83	T2	MA1503.1	HOXB9
1468	2.22518e-83	0.396789	0.666	0.49	1.65998e-80	T2	MA0060.3	NFYA
1469	1.18841e-82	0.438652	0.622	0.469	8.86557e-80	T2	MA0135.1	Lhx3
1470	4.26496e-81	0.418081	0.624	0.469	3.18166e-78	T2	MA0905.1	HOXC10
1471	4.93562e-81	0.546412	0.642	0.472	3.68197e-78	T2	MA0708.1	MSX2
1472	1.12401e-80	0.391174	0.631	0.473	8.38513e-78	T2	MA0148.4	FOXA1
1473	1.43478e-80	0.443087	0.652	0.498	1.07035e-77	T2	MA0036.3	GATA2
1474	2.50243e-80	0.733688	0.671	0.497	1.86682e-77	T2	MA1120.1	SOX13
1475	8.20395e-80	0.673111	0.67	0.495	6.12015e-77	T2	MA0143.4	SOX2
1476	1.79707e-79	0.417768	0.633	0.468	1.34061e-76	T2	MA1479.1	DMRTC2
1477	5.09801e-79	0.405334	0.629	0.468	3.80312e-76	T2	MA1640.1	MEIS2(var.2)
1478	6.86126e-79	0.534695	0.643	0.474	5.1185e-76	T2	MA0876.1	BSX
1479	9.06302e-79	0.367363	0.633	0.476	6.76101e-76	T2	MA0851.1	Foxj3
1480	1.2104e-78	0.369987	0.64	0.476	9.02957e-76	T2	MA0762.1	ETV2
1481	1.23588e-78	0.409686	0.64	0.481	9.21964e-76	T2	MA1636.1	CEBPG(var.2)
1482	2.67815e-78	0.533216	0.649	0.513	1.9979e-75	T2	MA0744.2	SCRT2
1483	4.54627e-78	0.4107	0.644	0.487	3.39152e-75	T2	MA0852.2	FOXK1
1484	1.00683e-76	0.804253	0.701	0.512	7.51093e-74	T2	MA0867.2	SOX4
1485	3.59488e-76	0.435071	0.621	0.477	2.68178e-73	T2	MA0914.1	ISL2
1486	1.49141e-74	0.674876	0.686	0.508	1.11259e-71	T2	MA0514.1	Sox3
1487	2.00186e-74	0.387715	0.647	0.488	1.49339e-71	T2	MA1683.1	FOXA3
1488	3.35676e-74	0.494864	0.632	0.474	2.50414e-71	T2	MA0885.1	Dlx2
1489	2.15338e-73	0.65767	0.666	0.486	1.60642e-70	T2	MA0699.1	LBX2
1490	4.64755e-73	0.533327	0.65	0.516	3.46707e-70	T2	MA0743.2	SCRT1
1491	1.85464e-72	0.384226	0.64	0.487	1.38356e-69	T2	MA0481.3	FOXP1
1492	4.27196e-72	0.421051	0.652	0.513	3.18688e-69	T2	MA0017.2	NR2F1
1493	1.41367e-71	0.371064	0.634	0.479	1.0546e-68	T2	MA1607.1	Foxl2
1494	3.50867e-71	0.453021	0.63	0.472	2.61746e-68	T2	MA0655.1	JDP2
1495	4.44468e-71	0.376825	0.617	0.466	3.31573e-68	T2	MA0635.1	BARHL2
1496	2.03498e-70	0.642654	0.657	0.491	1.51809e-67	T2	MA0068.2	PAX4
1497	2.03498e-70	0.642654	0.657	0.491	1.51809e-67	T2	MA0705.1	Lhx8
1498	2.03498e-70	0.642654	0.657	0.491	1.51809e-67	T2	MA1577.1	TLX2
1499	2.03498e-70	0.642654	0.657	0.491	1.51809e-67	T2	MA0701.2	LHX9
1500	2.03498e-70	0.642654	0.657	0.491	1.51809e-67	T2	MA0075.3	PRRX2
1501	2.28582e-70	0.345394	0.628	0.469	1.70522e-67	T2	MA0032.2	FOXC1
1502	2.35357e-70	0.398518	0.64	0.508	1.75576e-67	T2	MA0857.1	Rarb
1503	3.73521e-70	0.553193	0.643	0.482	2.78647e-67	T2	MA0726.1	VSX2
1504	6.76825e-70	0.558543	0.657	0.495	5.04912e-67	T2	MA1549.1	POU6F1(var.2)
1505	9.12936e-70	0.577053	0.645	0.488	6.8105e-67	T2	MA0618.1	LBX1
1506	9.53326e-70	0.569043	0.645	0.491	7.11181e-67	T2	MA1476.1	DLX5
1507	8.22337e-69	0.330984	0.63	0.477	6.13463e-66	T2	MA0846.1	FOXC2
1508	3.44454e-67	0.46211	0.628	0.475	2.56963e-64	T2	MA0700.2	LHX2
1509	3.61981e-67	0.400896	0.629	0.49	2.70038e-64	T2	MA0672.1	NKX2-3
1510	1.31456e-66	0.415728	0.628	0.477	9.80658e-64	T2	MA1504.1	HOXC4
1511	2.09669e-66	0.356003	0.625	0.493	1.56413e-63	T2	MA0694.1	ZBTB7B
1512	3.47778e-66	0.558701	0.646	0.488	2.59442e-63	T2	MA0634.1	ALX3
1513	7.06372e-65	0.3607	0.632	0.489	5.26954e-62	T2	MA1546.1	PAX3(var.2)
1514	9.05254e-65	0.34015	0.628	0.486	6.75319e-62	T2	MA0695.1	ZBTB7C
1515	1.40938e-64	0.375544	0.635	0.482	1.0514e-61	T2	MA1606.1	Foxf1
1516	2.00108e-63	0.288134	0.608	0.468	1.49281e-60	T2	MA0041.1	Foxd3
1517	2.85877e-63	0.576603	0.636	0.489	2.13265e-60	T2	MA0889.1	GBX1
1518	1.36538e-62	0.342748	0.628	0.49	1.01857e-59	T2	MA0686.1	SPDEF
1519	1.89309e-62	0.626309	0.651	0.49	1.41224e-59	T2	MA0720.1	Shox2
1520	2.23969e-61	0.418654	0.622	0.475	1.67081e-58	T2	MA0881.1	Dlx4
1521	4.69764e-61	0.34296	0.601	0.467	3.50444e-58	T2	MA0908.1	HOXD11
1522	1.08067e-60	0.348568	0.628	0.479	8.06182e-58	T2	MA0030.1	FOXF2
1523	1.27454e-60	0.349389	0.628	0.49	9.50804e-58	T2	MA1104.2	GATA6
1524	2.09797e-60	0.54867	0.64	0.494	1.56509e-57	T2	MA0793.1	POU6F2
1525	7.00997e-60	0.481252	0.664	0.499	5.22944e-57	T2	MA0090.3	TEAD1
1526	2.66788e-59	0.541349	0.636	0.484	1.99024e-56	T2	MA0725.1	VSX1
1527	4.61734e-59	0.351641	0.624	0.487	3.44453e-56	T2	MA1103.2	FOXK2
1528	1.33468e-58	0.356338	0.634	0.484	9.95672e-56	T2	MA1145.1	FOSL2::JUND(var.2)
1529	2.97733e-58	0.258857	0.578	0.436	2.22109e-55	T2	MA0754.1	CUX1
1530	5.66113e-58	0.636451	0.645	0.49	4.2232e-55	T2	MA0027.2	EN1
1531	6.79924e-58	0.539771	0.637	0.488	5.07224e-55	T2	MA0644.1	ESX1
1532	3.98083e-57	0.333836	0.588	0.458	2.9697e-54	T2	MA1099.2	HES1
1533	7.37163e-57	0.33786	0.628	0.488	5.49924e-54	T2	MA0042.2	FOXI1
1534	7.37163e-57	0.33786	0.628	0.488	5.49924e-54	T2	MA0033.2	FOXL1
1535	7.37163e-57	0.33786	0.628	0.488	5.49924e-54	T2	MA0848.1	FOXO4
1536	7.37163e-57	0.33786	0.628	0.488	5.49924e-54	T2	MA0849.1	FOXO6
1537	7.37163e-57	0.33786	0.628	0.488	5.49924e-54	T2	MA0850.1	FOXP3
1538	1.19875e-56	0.542089	0.646	0.494	8.94267e-54	T2	MA1463.1	ARGFX
1539	1.55359e-56	0.545181	0.63	0.485	1.15898e-53	T2	MA0886.1	EMX2
1540	2.1258e-56	0.332445	0.594	0.472	1.58585e-53	T2	MA0025.2	NFIL3
1541	2.48348e-56	0.587284	0.629	0.492	1.85267e-53	T2	MA0710.1	NOTO
1542	4.17004e-56	0.329544	0.611	0.479	3.11085e-53	T2	MA0629.1	Rhox11
1543	2.92976e-55	0.477707	0.619	0.484	2.1856e-52	T2	MA0888.1	EVX2
1544	3.32551e-55	0.32695	0.592	0.465	2.48083e-52	T2	MA0485.2	HOXC9
1545	9.32859e-55	0.442387	0.608	0.475	6.95913e-52	T2	MA0882.1	DLX6
1546	1.2687e-53	0.348113	0.608	0.477	9.46447e-51	T2	MA1473.1	CDX4
1547	5.37891e-53	0.518496	0.63	0.486	4.01267e-50	T2	MA0654.1	ISX
1548	5.37891e-53	0.518496	0.63	0.486	4.01267e-50	T2	MA0716.1	PRRX1
1549	5.37891e-53	0.518496	0.63	0.486	4.01267e-50	T2	MA0717.1	RAX2
1550	1.24484e-52	0.482742	0.614	0.482	9.2865e-50	T2	MA0132.2	PDX1
1551	1.24484e-52	0.482742	0.614	0.482	9.2865e-50	T2	MA0612.2	EMX1
1552	1.24484e-52	0.482742	0.614	0.482	9.2865e-50	T2	MA0893.2	GSX2
1553	1.24484e-52	0.482742	0.614	0.482	9.2865e-50	T2	MA0900.2	HOXA2
1554	1.24484e-52	0.482742	0.614	0.482	9.2865e-50	T2	MA0902.2	HOXB2
1555	2.76375e-52	0.300675	0.581	0.456	2.06175e-49	T2	MA0619.1	LIN54
1556	1.79793e-51	0.485338	0.621	0.477	1.34126e-48	T2	MA0875.1	BARX1
1557	1.4129e-50	0.449451	0.656	0.495	1.05402e-47	T2	MA1121.1	TEAD2
1558	1.88751e-50	0.433466	0.611	0.473	1.40808e-47	T2	MA0709.1	Msx3
1559	2.54138e-50	0.397108	0.608	0.48	1.89587e-47	T2	MA0158.2	HOXA5
1560	2.9919e-50	0.30556	0.605	0.469	2.23196e-47	T2	MA0873.1	HOXD12
1561	3.33078e-49	0.494679	0.622	0.489	2.48476e-46	T2	MA0658.1	LHX6
1562	4.01251e-49	0.318055	0.625	0.488	2.99333e-46	T2	MA0609.2	CREM
1563	8.11683e-49	0.271879	0.59	0.47	6.05515e-46	T2	MA0681.2	PHOX2B
1564	1.03633e-48	0.310435	0.604	0.486	7.73102e-46	T2	MA0029.1	Mecom
1565	1.06069e-47	0.502039	0.629	0.493	7.91274e-45	T2	MA0662.1	MIXL1
1566	4.22578e-47	0.512855	0.646	0.505	3.15243e-44	T2	MA0442.2	SOX10
1567	1.0756e-46	0.363303	0.605	0.485	8.02398e-44	T2	MA0087.1	Sox5
1568	8.95833e-45	0.364067	0.608	0.47	6.68291e-42	T2	MA1502.1	HOXB8
1569	1.16309e-43	0.416997	0.604	0.477	8.67663e-41	T2	MA0125.1	Nobox
1570	4.04211e-43	0.256554	0.608	0.492	3.01542e-40	T2	MA0742.1	Klf12
1571	9.20985e-43	0.285641	0.59	0.467	6.87055e-40	T2	MA1506.1	HOXD10
1572	2.63114e-42	0.260436	0.602	0.492	1.96283e-39	T2	MA1484.1	ETS2
1573	3.36407e-42	0.281516	0.596	0.488	2.5096e-39	T2	MA1580.1	ZBTB32
1574	4.31885e-41	0.285704	0.607	0.485	3.22186e-38	T2	MA1126.1	FOS::JUN(var.2)
1575	3.10533e-40	0.280501	0.594	0.48	2.31658e-37	T2	MA0043.3	HLF
1576	3.68986e-40	0.273142	0.589	0.483	2.75264e-37	T2	MA0031.1	FOXD1
1577	3.68986e-40	0.273142	0.589	0.483	2.75264e-37	T2	MA0157.2	FOXO3
1578	7.83708e-40	0.343924	0.61	0.491	5.84646e-37	T2	MA0768.1	LEF1
1579	1.0227e-39	0.460549	0.599	0.488	7.62934e-37	T2	MA0077.1	SOX9
1580	1.2012e-38	0.303671	0.588	0.48	8.96096e-36	T2	MA0913.2	HOXD9
1581	1.38532e-38	0.453941	0.601	0.483	1.03345e-35	T2	MA0890.1	GBX2
1582	1.6792e-38	0.265452	0.59	0.48	1.25268e-35	T2	MA0847.2	FOXD2
1583	2.2024e-38	0.407424	0.607	0.489	1.64299e-35	T2	MA0718.1	RAX
1584	8.07243e-38	0.267937	0.567	0.458	6.02203e-35	T2	MA1478.1	DMRTA2
1585	1.60748e-37	0.451451	0.61	0.494	1.19918e-34	T2	MA0854.1	Alx1
1586	7.31404e-37	0.284582	0.587	0.479	5.45628e-34	T2	MA0040.1	Foxq1
1587	7.59294e-37	0.474918	0.609	0.485	5.66433e-34	T2	MA0868.2	SOX8
1588	1.60505e-36	0.361505	0.611	0.496	1.19736e-33	T2	MA0523.1	TCF7L2
1589	4.34021e-35	0.267793	0.577	0.468	3.2378e-32	T2	MA0748.2	YY2
1590	1.18049e-34	0.348981	0.625	0.493	8.80643e-32	T2	MA0809.2	TEAD4
1591	8.14989e-34	0.259109	0.604	0.491	6.07982e-31	T2	MA1133.1	JUN::JUNB(var.2)
1592	1.03108e-33	0.254326	0.588	0.485	7.69183e-31	T2	MA0466.2	CEBPB
1593	1.54784e-33	0.253753	0.584	0.486	1.15469e-30	T2	MA0837.1	CEBPE
1594	1.51216e-32	0.399654	0.607	0.494	1.12807e-29	T2	MA0621.1	mix-a
1595	8.15973e-31	0.329911	0.613	0.49	6.08716e-28	T2	MA0808.1	TEAD3
1596	1.7982e-30	0.310386	0.591	0.486	1.34146e-27	T2	MA1530.1	NKX6-3
1597	2.97995e-30	0.261178	0.576	0.484	2.22304e-27	T2	MA0907.1	HOXC13
1598	5.60336e-30	0.395679	0.597	0.491	4.1801e-27	T2	MA0630.1	SHOX
1599	3.751e-29	0.273791	0.594	0.512	2.79825e-26	T2	MA0859.1	Rarg
1600	1.19276e-28	0.372667	0.596	0.491	8.89803e-26	T2	MA1562.1	SOX14
1601	2.1114e-28	0.37314	0.595	0.49	1.57511e-25	T2	MA0704.1	Lhx4
1602	2.1114e-28	0.37314	0.595	0.49	1.57511e-25	T2	MA0721.1	UNCX
1603	3.23354e-25	0.347023	0.58	0.492	2.41222e-22	T2	MA0874.1	Arx
1604	4.671e-25	0.376869	0.581	0.494	3.48457e-22	T2	MA0853.1	Alx4
1605	1.80188e-24	0.309656	0.574	0.488	1.3442e-21	T2	MA0707.1	MNX1
1606	1.16287e-19	0.252171	0.547	0.476	8.67499e-17	T2	MA1152.1	SOX15
1607	1.86475e-19	0.348235	0.574	0.489	1.39111e-16	T2	MA0892.1	GSX1
1608	1.95128e-19	0.282776	0.568	0.487	1.45566e-16	T2	MA0674.1	NKX6-1
1609	1.95128e-19	0.282776	0.568	0.487	1.45566e-16	T2	MA0675.1	NKX6-2
1610	1.95128e-19	0.282776	0.568	0.487	1.45566e-16	T2	MA1519.1	LHX5
1611	6.89152e-18	0.261088	0.563	0.481	5.14107e-15	T2	MA0661.1	MEOX1
1612	1.1127e-16	0.275551	0.558	0.487	8.30076e-14	T2	MA0903.1	HOXB3
1613	0	4.04126	0.963	0.369	0	cones	MA0467.1	Crx
1614	0	3.7227	0.965	0.375	0	cones	MA0891.1	GSC2
1615	0	3.58675	0.963	0.372	0	cones	MA0712.2	OTX2
1616	0	3.51115	0.963	0.382	0	cones	MA0648.1	GSC
1617	0	3.37932	0.959	0.386	0	cones	MA0682.2	PITX1
1618	0	3.28239	0.958	0.38	0	cones	MA0714.1	PITX3
1619	0	3.20743	0.965	0.384	0	cones	MA1547.1	PITX2
1620	0	3.14729	0.953	0.38	0	cones	MA1480.1	DPRX
1621	0	2.98652	0.947	0.369	0	cones	MA0883.1	Dmbx1
1622	0	2.54609	0.942	0.387	0	cones	MA0719.1	RHOXF1
1623	0	1.54152	0.862	0.414	0	cones	MA0711.1	OTX1
1624	0	1.35348	0.834	0.443	0	cones	MA0035.4	GATA1
1625	0	0.719347	0.789	0.475	0	cones	MA1587.1	ZNF135
1626	7.64538e-306	0.841078	0.738	0.456	5.70345e-303	cones	MA0748.2	YY2
1627	7.25732e-255	0.358928	0.717	0.465	5.41396e-252	cones	MA1596.1	ZNF460
1628	7.39237e-231	0.679925	0.717	0.464	5.51471e-228	cones	MA0028.2	ELK1
1629	1.53714e-209	0.672188	0.698	0.469	1.1467e-206	cones	MA0884.1	DUXA
1630	4.34159e-176	0.583285	0.671	0.462	3.23882e-173	cones	MA0864.2	E2F2
1631	3.39395e-171	0.554994	0.681	0.471	2.53189e-168	cones	MA0759.1	ELK3
1632	5.64865e-169	0.715272	0.68	0.399	4.21389e-166	cones	MA1109.1	NEUROD1
1633	8.35453e-168	0.580741	0.698	0.5	6.23248e-165	cones	MA0728.1	Nr2f6(var.2)
1634	4.57055e-158	0.678941	0.68	0.402	3.40963e-155	cones	MA1642.1	NEUROG2(var.2)
1635	1.15609e-139	0.510971	0.671	0.479	8.62441e-137	cones	MA0763.1	ETV3
1636	9.60357e-137	0.538448	0.662	0.489	7.16426e-134	cones	MA0829.2	SREBF1(var.2)
1637	4.25823e-118	0.463929	0.657	0.477	3.17664e-115	cones	MA0156.2	FEV
1638	1.21459e-116	0.312873	0.649	0.471	9.06085e-114	cones	MA0079.4	SP1
1639	1.09176e-101	0.342172	0.621	0.464	8.1445e-99	cones	MA1516.1	KLF3
1640	1.22091e-100	0.384827	0.645	0.481	9.10797e-98	cones	MA0076.2	ELK4
1641	5.04414e-86	0.446884	0.665	0.526	3.76293e-83	cones	MA0860.1	Rarg(var.2)
1642	3.3339e-81	0.434125	0.601	0.463	2.48709e-78	cones	MA0713.1	PHOX2A
1643	2.36913e-76	0.404867	0.637	0.509	1.76737e-73	cones	MA0859.1	Rarg
1644	2.44377e-65	0.354429	0.649	0.523	1.82306e-62	cones	MA0745.2	SNAI2
1645	6.53008e-65	0.350646	0.562	0.438	4.87144e-62	cones	MA0527.1	ZBTB33
1646	1.18107e-64	0.330797	0.602	0.482	8.81077e-62	cones	MA0660.1	MEF2B
1647	6.11574e-61	0.331044	0.545	0.419	4.56234e-58	cones	MA0506.1	NRF1
1648	8.15781e-61	0.302169	0.577	0.423	6.08572e-58	cones	MA0091.1	TAL1::TCF3
1649	2.39138e-59	0.345186	0.64	0.521	1.78397e-56	cones	MA0494.1	Nr1h3::Rxra
1650	1.01274e-55	0.339291	0.579	0.473	7.55504e-53	cones	MA0468.1	DUX4
1651	2.74051e-55	0.290834	0.591	0.452	2.04442e-52	cones	MA1568.1	TCF21(var.2)
1652	2.83118e-55	0.336473	0.618	0.514	2.11206e-52	cones	MA0017.2	NR2F1
1653	2.39229e-44	0.310361	0.625	0.512	1.78465e-41	cones	MA0820.1	FIGLA
1654	8.08786e-43	0.262616	0.591	0.485	6.03354e-40	cones	MA0095.2	YY1
1655	0	2.67057	0.877	0.358	0	RPCs	MA0868.2	SOX8
1656	0	2.39672	0.85	0.371	0	RPCs	MA0892.1	GSX1
1657	0	2.38137	0.848	0.377	0	RPCs	MA0027.2	EN1
1658	0	2.30675	0.854	0.408	0	RPCs	MA0867.2	SOX4
1659	0	2.25177	0.84	0.368	0	RPCs	MA0890.1	GBX2
1660	0	2.19731	0.828	0.382	0	RPCs	MA0808.1	TEAD3
1661	0	2.19473	0.844	0.376	0	RPCs	MA0699.1	LBX2
1662	0	2.19174	0.836	0.382	0	RPCs	MA0720.1	Shox2
1663	0	2.182	0.85	0.408	0	RPCs	MA0515.1	Sox6
1664	0	2.14017	0.846	0.389	0	RPCs	MA1120.1	SOX13
1665	0	2.11242	0.859	0.349	0	RPCs	MA1152.1	SOX15
1666	0	2.10519	0.841	0.377	0	RPCs	MA1562.1	SOX14
1667	0	2.06945	0.83	0.374	0	RPCs	MA0903.1	HOXB3
1668	0	2.05019	0.828	0.378	0	RPCs	MA0077.1	SOX9
1669	0	2.03646	0.819	0.389	0	RPCs	MA0710.1	NOTO
1670	0	2.02874	0.816	0.396	0	RPCs	MA1121.1	TEAD2
1671	0	1.99106	0.816	0.386	0	RPCs	MA0630.1	SHOX
1672	0	1.98377	0.822	0.386	0	RPCs	MA0853.1	Alx4
1673	0	1.98302	0.808	0.394	0	RPCs	MA0809.2	TEAD4
1674	0	1.96778	0.845	0.404	0	RPCs	MA0514.1	Sox3
1675	0	1.95271	0.822	0.379	0	RPCs	MA0725.1	VSX1
1676	0	1.94495	0.811	0.383	0	RPCs	MA0886.1	EMX2
1677	0	1.9384	0.813	0.391	0	RPCs	MA0068.2	PAX4
1678	0	1.9384	0.813	0.391	0	RPCs	MA0705.1	Lhx8
1679	0	1.9384	0.813	0.391	0	RPCs	MA1577.1	TLX2
1680	0	1.9384	0.813	0.391	0	RPCs	MA0701.2	LHX9
1681	0	1.9384	0.813	0.391	0	RPCs	MA0075.3	PRRX2
1682	0	1.9278	0.81	0.372	0	RPCs	MA0875.1	BARX1
1683	0	1.90697	0.812	0.383	0	RPCs	MA0654.1	ISX
1684	0	1.90697	0.812	0.383	0	RPCs	MA0716.1	PRRX1
1685	0	1.90697	0.812	0.383	0	RPCs	MA0717.1	RAX2
1686	0	1.90529	0.818	0.396	0	RPCs	MA0143.4	SOX2
1687	0	1.8777	0.813	0.387	0	RPCs	MA0889.1	GBX1
1688	0	1.8574	0.822	0.406	0	RPCs	MA0442.2	SOX10
1689	0	1.83542	0.808	0.394	0	RPCs	MA0662.1	MIXL1
1690	0	1.82296	0.804	0.406	0	RPCs	MA0090.3	TEAD1
1691	0	1.82092	0.803	0.39	0	RPCs	MA0658.1	LHX6
1692	0	1.79853	0.808	0.379	0	RPCs	MA0132.2	PDX1
1693	0	1.79853	0.808	0.379	0	RPCs	MA0612.2	EMX1
1694	0	1.79853	0.808	0.379	0	RPCs	MA0893.2	GSX2
1695	0	1.79853	0.808	0.379	0	RPCs	MA0900.2	HOXA2
1696	0	1.79853	0.808	0.379	0	RPCs	MA0902.2	HOXB2
1697	0	1.79047	0.801	0.395	0	RPCs	MA0621.1	mix-a
1698	0	1.79031	0.8	0.396	0	RPCs	MA0854.1	Alx1
1699	0	1.78709	0.803	0.373	0	RPCs	MA0125.1	Nobox
1700	0	1.78203	0.795	0.392	0	RPCs	MA0704.1	Lhx4
1701	0	1.78203	0.795	0.392	0	RPCs	MA0721.1	UNCX
1702	0	1.77632	0.791	0.372	0	RPCs	MA0709.1	Msx3
1703	0	1.77615	0.796	0.392	0	RPCs	MA0644.1	ESX1
1704	0	1.74969	0.811	0.395	0	RPCs	MA0793.1	POU6F2
1705	0	1.74741	0.806	0.391	0	RPCs	MA0874.1	Arx
1706	0	1.74536	0.796	0.401	0	RPCs	MA1463.1	ARGFX
1707	0	1.745	0.8	0.391	0	RPCs	MA0618.1	LBX1
1708	0	1.73668	0.808	0.381	0	RPCs	MA0726.1	VSX2
1709	0	1.71667	0.781	0.383	0	RPCs	MA0661.1	MEOX1
1710	0	1.70497	0.799	0.396	0	RPCs	MA1476.1	DLX5
1711	0	1.69474	0.807	0.396	0	RPCs	MA0894.1	HESX1
1712	0	1.6915	0.783	0.39	0	RPCs	MA0666.1	MSX1
1713	0	1.68346	0.79	0.395	0	RPCs	MA0634.1	ALX3
1714	0	1.67227	0.796	0.382	0	RPCs	MA0628.1	POU6F1
1715	0	1.66527	0.781	0.392	0	RPCs	MA0674.1	NKX6-1
1716	0	1.66527	0.781	0.392	0	RPCs	MA0675.1	NKX6-2
1717	0	1.66527	0.781	0.392	0	RPCs	MA1519.1	LHX5
1718	0	1.65528	0.786	0.395	0	RPCs	MA0718.1	RAX
1719	0	1.62787	0.78	0.374	0	RPCs	MA0722.1	VAX1
1720	0	1.62787	0.78	0.374	0	RPCs	MA0723.1	VAX2
1721	0	1.62787	0.78	0.374	0	RPCs	MA1481.1	DRGX
1722	0	1.59632	0.767	0.378	0	RPCs	MA1501.1	HOXB7
1723	0	1.56532	0.78	0.402	0	RPCs	MA0642.1	EN2
1724	0	1.52832	0.787	0.405	0	RPCs	MA1549.1	POU6F1(var.2)
1725	0	1.52028	0.772	0.395	0	RPCs	MA0707.1	MNX1
1726	0	1.50354	0.754	0.386	0	RPCs	MA0708.1	MSX2
1727	0	1.45155	0.761	0.398	0	RPCs	MA0703.2	LMX1B
1728	0	1.44088	0.753	0.389	0	RPCs	MA1497.1	HOXA6
1729	0	1.42915	0.754	0.384	0	RPCs	MA0702.2	LMX1A
1730	0	1.4254	0.76	0.402	0	RPCs	MA0912.2	HOXD3
1731	0	1.41474	0.753	0.388	0	RPCs	MA0882.1	DLX6
1732	0	1.40894	0.755	0.4	0	RPCs	MA0888.1	EVX2
1733	0	1.40578	0.75	0.395	0	RPCs	MA0706.1	MEOX2
1734	0	1.39957	0.736	0.375	0	RPCs	MA1500.1	HOXB6
1735	0	1.39021	0.676	0.408	0	RPCs	MA1144.1	FOSL2::JUND
1736	0	1.37977	0.748	0.391	0	RPCs	MA0876.1	BSX
1737	0	1.35019	0.75	0.417	0	RPCs	MA0523.1	TCF7L2
1738	0	1.34597	0.668	0.405	0	RPCs	MA1138.1	FOSL2::JUNB
1739	0	1.34259	0.763	0.452	0	RPCs	MA1563.1	SOX18
1740	0	1.33328	0.758	0.399	0	RPCs	MA1530.1	NKX6-3
1741	0	1.33287	0.75	0.387	0	RPCs	MA1495.1	HOXA1
1742	0	1.33287	0.75	0.387	0	RPCs	MA0904.2	HOXB5
1743	0	1.32965	0.739	0.393	0	RPCs	MA0885.1	Dlx2
1744	0	1.32959	0.763	0.387	0	RPCs	MA1561.1	SOX12
1745	0	1.32401	0.769	0.396	0	RPCs	MA0087.1	Sox5
1746	0	1.30919	0.66	0.417	0	RPCs	MA1130.1	FOSL2::JUN
1747	0	1.29632	0.742	0.404	0	RPCs	MA0879.1	Dlx1
1748	0	1.27221	0.744	0.412	0	RPCs	MA1518.1	LHX1
1749	0	1.25739	0.655	0.419	0	RPCs	MA1141.1	FOS::JUND
1750	0	1.24658	0.655	0.41	0	RPCs	MA1137.1	FOSL1::JUNB
1751	0	1.24127	0.657	0.415	0	RPCs	MA1142.1	FOSL1::JUND
1752	0	1.23946	0.67	0.415	0	RPCs	MA0655.1	JDP2
1753	0	1.2394	0.715	0.395	0	RPCs	MA1502.1	HOXB8
1754	0	1.23822	0.729	0.399	0	RPCs	MA0700.2	LHX2
1755	0	1.22253	0.65	0.417	0	RPCs	MA1134.1	FOS::JUNB
1756	0	1.19139	0.643	0.422	0	RPCs	MA1128.1	FOSL1::JUN
1757	0	1.18756	0.718	0.394	0	RPCs	MA0896.1	Hmx1
1758	0	1.1819	0.652	0.422	0	RPCs	MA1135.1	FOSB::JUNB
1759	0	1.16158	0.72	0.411	0	RPCs	MA0887.1	EVX1
1760	0	1.16	0.642	0.425	0	RPCs	MA0099.3	FOS::JUN
1761	0	1.151	0.644	0.424	0	RPCs	MA0477.2	FOSL1
1762	0	1.14434	0.726	0.391	0	RPCs	MA1534.1	NR1I3
1763	0	1.14328	0.718	0.401	0	RPCs	MA0881.1	Dlx4
1764	0	1.12718	0.701	0.422	0	RPCs	MA0769.2	TCF7
1765	0	1.127	0.66	0.435	0	RPCs	MA0841.1	NFE2
1766	0	1.12398	0.645	0.439	0	RPCs	MA0478.1	FOSL2
1767	0	1.09876	0.636	0.42	0	RPCs	MA0491.2	JUND
1768	0	1.09581	0.709	0.41	0	RPCs	MA0158.2	HOXA5
1769	0	1.0795	0.644	0.426	0	RPCs	MA1132.1	JUN::JUNB
1770	0	1.07464	0.634	0.434	0	RPCs	MA0489.1	JUN(var.2)
1771	0	1.07325	0.701	0.394	0	RPCs	MA1505.1	HOXC8
1772	0	1.05545	0.705	0.41	0	RPCs	MA0880.1	Dlx3
1773	0	1.04622	0.646	0.431	0	RPCs	MA1101.2	BACH2
1774	0	1.01712	0.616	0.431	0	RPCs	MA0476.1	FOS
1775	0	0.999661	0.704	0.408	0	RPCs	MA0601.1	Arid3b
1776	0	0.99193	0.623	0.428	0	RPCs	MA0490.2	JUNB
1777	0	0.984665	0.704	0.455	0	RPCs	MA0078.1	Sox17
1778	0	0.958129	0.619	0.445	0	RPCs	MA1622.1	Smad2::Smad3
1779	0	0.954897	0.691	0.442	0	RPCs	MA0142.1	Pou5f1::Sox2
1780	0	0.927079	0.693	0.468	0	RPCs	MA1528.1	NFIX(var.2)
1781	0	0.897858	0.679	0.409	0	RPCs	MA0898.1	Hmx3
1782	0	0.897451	0.68	0.397	0	RPCs	MA0772.1	IRF7
1783	0	0.891223	0.606	0.436	0	RPCs	MA0462.2	BATF::JUN
1784	0	0.887772	0.667	0.438	0	RPCs	MA0768.1	LEF1
1785	0	0.864211	0.608	0.438	0	RPCs	MA0835.2	BATF3
1786	0	0.857133	0.691	0.419	0	RPCs	MA0907.1	HOXC13
1787	0	0.847806	0.601	0.439	0	RPCs	MA1634.1	BATF
1788	0	0.84699	0.683	0.406	0	RPCs	MA0653.1	IRF9
1789	0	0.835481	0.66	0.405	0	RPCs	MA0084.1	SRY
1790	0	0.831761	0.709	0.413	0	RPCs	MA0517.1	STAT1::STAT2
1791	0	0.825468	0.68	0.469	0	RPCs	MA0671.1	NFIX
1792	0	0.808283	0.66	0.414	0	RPCs	MA0897.1	Hmx2
1793	0	0.78343	0.665	0.468	0	RPCs	MA0670.1	NFIA
1794	0	0.769515	0.661	0.441	0	RPCs	MA0869.1	Sox11
1795	0	0.768703	0.653	0.415	0	RPCs	MA0652.1	IRF8
1796	0	0.750372	0.729	0.48	0	RPCs	MA1548.1	PLAGL2
1797	0	0.74322	0.668	0.442	0	RPCs	MA1418.1	IRF3
1798	0	0.72498	0.647	0.445	0	RPCs	MA1507.1	HOXD4
1799	0	0.721201	0.655	0.442	0	RPCs	MA1499.1	HOXB4
1800	0	0.716856	0.658	0.419	0	RPCs	MA0780.1	PAX3
1801	0	0.696486	0.673	0.466	0	RPCs	MA1624.1	Stat5a
1802	0	0.69059	0.651	0.427	0	RPCs	MA0040.1	Foxq1
1803	0	0.688547	0.67	0.465	0	RPCs	MA0486.2	HSF1
1804	0	0.668142	0.638	0.453	0	RPCs	MA1421.1	TCF7L1
1805	0	0.648769	0.655	0.487	0	RPCs	MA1124.1	ZNF24
1806	0	0.64573	0.633	0.424	0	RPCs	MA1419.1	IRF4
1807	0	0.64475	0.63	0.435	0	RPCs	MA1504.1	HOXC4
1808	0	0.64035	0.638	0.444	0	RPCs	MA0836.2	CEBPD
1809	0	0.637385	0.656	0.472	0	RPCs	MA0107.1	RELA
1810	0	0.636781	0.653	0.468	0	RPCs	MA0137.3	STAT1
1811	0	0.636557	0.667	0.46	0	RPCs	MA0693.2	VDR
1812	0	0.628145	0.65	0.464	0	RPCs	MA1487.1	FOXE1
1813	0	0.620167	0.642	0.462	0	RPCs	MA0520.1	Stat6
1814	0	0.61658	0.634	0.419	0	RPCs	MA1471.1	BARX2
1815	0	0.587836	0.647	0.483	0	RPCs	MA1625.1	Stat5b
1816	0	0.586167	0.626	0.435	0	RPCs	MA1498.1	HOXA7
1817	0	0.586167	0.626	0.435	0	RPCs	MA0910.2	HOXD8
1818	0	0.579101	0.616	0.438	0	RPCs	MA0899.1	HOXA10
1819	0	0.575524	0.65	0.479	0	RPCs	MA0519.1	Stat5a::Stat5b
1820	0	0.571566	0.629	0.437	0	RPCs	MA0043.3	HLF
1821	0	0.567395	0.637	0.468	0	RPCs	MA0870.1	Sox1
1822	0	0.564738	0.634	0.479	0	RPCs	MA0101.1	REL
1823	0	0.559188	0.645	0.475	0	RPCs	MA1578.1	VEZF1
1824	0	0.55889	0.611	0.431	0	RPCs	MA1657.1	ZNF652
1825	0	0.552888	0.606	0.441	0	RPCs	MA0784.1	POU1F1
1826	0	0.544082	0.65	0.489	0	RPCs	MA1579.1	ZBTB26
1827	0	0.530486	0.665	0.415	0	RPCs	MA0050.2	IRF1
1828	0	0.528005	0.618	0.427	0	RPCs	MA0680.1	PAX7
1829	0	0.526787	0.6	0.439	0	RPCs	MA0051.1	IRF2
1830	0	0.523661	0.622	0.455	0	RPCs	MA1420.1	IRF5
1831	0	0.517256	0.659	0.499	0	RPCs	MA1491.1	GLI3
1832	0	0.513321	0.598	0.436	0	RPCs	MA0135.1	Lhx3
1833	0	0.508513	0.594	0.444	0	RPCs	MA0787.1	POU3F2
1834	0	0.505711	0.623	0.465	0	RPCs	MA1119.1	SIX2
1835	0	0.495478	0.6	0.444	0	RPCs	MA0914.1	ISL2
1836	0	0.488346	0.601	0.448	0	RPCs	MA0030.1	FOXF2
1837	0	0.485177	0.622	0.458	0	RPCs	MA0687.1	SPIC
1838	0	0.4794	0.61	0.439	0	RPCs	MA0776.1	MYBL1
1839	0	0.477679	0.601	0.443	0	RPCs	MA0724.1	VENTX
1840	0	0.464249	0.655	0.481	0	RPCs	MA0105.4	NFKB1
1841	0	0.454683	0.635	0.461	0	RPCs	MA1623.1	Stat2
1842	0	0.434273	0.622	0.415	0	RPCs	MA1125.1	ZNF384
1843	0	0.420818	0.583	0.434	0	RPCs	MA1509.1	IRF6
1844	2.41899e-306	0.560416	0.637	0.472	1.80457e-303	RPCs	MA0069.1	PAX6
1845	1.46934e-301	0.712879	0.66	0.481	1.09613e-298	RPCs	MA1527.1	NFIC(var.2)
1846	6.74354e-298	0.482956	0.653	0.501	5.03068e-295	RPCs	MA0734.2	GLI2
1847	1.63585e-294	0.629474	0.65	0.478	1.22035e-291	RPCs	MA1643.1	NFIB
1848	6.14848e-293	0.515756	0.633	0.482	4.58676e-290	RPCs	MA0518.1	Stat4
1849	6.59909e-293	0.500476	0.629	0.479	4.92292e-290	RPCs	MA0114.4	HNF4A
1850	1.8255e-292	0.406932	0.635	0.486	1.36182e-289	RPCs	MA0778.1	NFKB2
1851	2.70249e-285	0.269356	0.598	0.454	2.01606e-282	RPCs	MA1102.2	CTCFL
1852	1.47882e-284	0.424661	0.59	0.45	1.1032e-281	RPCs	MA0847.2	FOXD2
1853	3.41795e-283	0.515566	0.628	0.478	2.54979e-280	RPCs	MA0771.1	HSF4
1854	1.46123e-280	0.491866	0.618	0.472	1.09008e-277	RPCs	MA0770.1	HSF2
1855	2.37569e-280	0.478249	0.609	0.464	1.77227e-277	RPCs	MA0866.1	SOX21
1856	6.47661e-278	0.46277	0.592	0.455	4.83155e-275	RPCs	MA1606.1	Foxf1
1857	5.01576e-272	0.469119	0.588	0.45	3.74176e-269	RPCs	MA0913.2	HOXD9
1858	1.09508e-269	0.488684	0.603	0.47	8.1693e-267	RPCs	MA0593.1	FOXP2
1859	1.17684e-268	0.407692	0.579	0.447	8.77923e-266	RPCs	MA1603.1	Dmrt1
1860	1.45604e-268	0.483501	0.628	0.483	1.08621e-265	RPCs	MA0484.2	HNF4G
1861	1.60121e-262	0.478656	0.623	0.477	1.1945e-259	RPCs	MA1608.1	Isl1
1862	8.49001e-262	0.475146	0.606	0.466	6.33354e-259	RPCs	MA1496.1	HOXA4
1863	4.24113e-261	0.491832	0.621	0.483	3.16388e-258	RPCs	MA0508.3	PRDM1
1864	2.26839e-258	0.512475	0.609	0.476	1.69222e-255	RPCs	MA1525.1	NFATC4
1865	4.54042e-257	0.509866	0.637	0.494	3.38715e-254	RPCs	MA0144.2	STAT3
1866	6.95541e-256	0.467593	0.625	0.49	5.18874e-253	RPCs	MA1154.1	ZNF282
1867	2.63652e-255	0.452668	0.611	0.475	1.96684e-252	RPCs	MA0673.1	NKX2-8
1868	3.70118e-254	0.474356	0.631	0.489	2.76108e-251	RPCs	MA0057.1	MZF1(var.2)
1869	3.58183e-250	0.385609	0.579	0.444	2.67205e-247	RPCs	MA0025.2	NFIL3
1870	2.40073e-245	0.571997	0.64	0.485	1.79094e-242	RPCs	MA0119.1	NFIC::TLX1
1871	3.10985e-244	0.396369	0.574	0.44	2.31995e-241	RPCs	MA1489.1	FOXN3
1872	1.90035e-240	0.497432	0.624	0.487	1.41766e-237	RPCs	MA1117.1	RELB
1873	2.90972e-230	0.388148	0.556	0.432	2.17065e-227	RPCs	MA1478.1	DMRTA2
1874	3.51042e-229	0.504225	0.658	0.511	2.61877e-226	RPCs	MA1600.1	ZNF684
1875	1.50479e-227	0.59919	0.645	0.501	1.12257e-224	RPCs	MA0161.2	NFIC
1876	7.54854e-224	0.412974	0.602	0.472	5.63121e-221	RPCs	MA0684.2	RUNX3
1877	6.79057e-223	0.449329	0.618	0.486	5.06576e-220	RPCs	MA0744.2	SCRT2
1878	1.03597e-220	0.364175	0.624	0.489	7.72832e-218	RPCs	MA0080.5	SPI1
1879	3.67389e-218	0.32669	0.567	0.442	2.74072e-215	RPCs	MA0901.2	HOXB13
1880	1.64202e-213	0.406191	0.57	0.446	1.22495e-210	RPCs	MA0789.1	POU3F4
1881	6.72192e-213	0.429533	0.634	0.496	5.01456e-210	RPCs	MA1149.1	RARA::RXRG
1882	1.45551e-212	0.334171	0.574	0.454	1.08581e-209	RPCs	MA0846.1	FOXC2
1883	5.91929e-211	0.348946	0.594	0.467	4.41579e-208	RPCs	MA0694.1	ZBTB7B
1884	3.99324e-208	0.410461	0.577	0.457	2.97896e-205	RPCs	MA0625.1	NFATC3
1885	5.2745e-208	0.387546	0.583	0.463	3.93478e-205	RPCs	MA0865.1	E2F8
1886	1.85e-206	0.439709	0.615	0.491	1.3801e-203	RPCs	MA0743.2	SCRT1
1887	3.38093e-202	0.380399	0.578	0.458	2.52217e-199	RPCs	MA0758.1	E2F7
1888	1.06932e-201	0.373745	0.563	0.446	7.9771e-199	RPCs	MA0788.1	POU3F3
1889	1.09243e-196	0.318506	0.573	0.455	8.1495e-194	RPCs	MA1545.1	OVOL2
1890	1.19453e-192	0.286665	0.534	0.414	8.91121e-190	RPCs	MA1122.1	TFDP1
1891	1.66001e-192	0.296194	0.576	0.458	1.23837e-189	RPCs	MA0733.1	EGR4
1892	7.51925e-190	0.366829	0.561	0.45	5.60936e-187	RPCs	MA0614.1	Foxj2
1893	5.84146e-187	0.393419	0.645	0.509	4.35773e-184	RPCs	MA0155.1	INSM1
1894	8.03307e-187	0.390683	0.564	0.452	5.99267e-184	RPCs	MA0792.1	POU5F1B
1895	1.55728e-183	0.342237	0.566	0.456	1.16173e-180	RPCs	MA0647.1	GRHL1
1896	1.71559e-183	0.366277	0.553	0.447	1.27983e-180	RPCs	MA0786.1	POU3F1
1897	8.31803e-181	0.330402	0.567	0.454	6.20525e-178	RPCs	MA0145.3	TFCP2
1898	2.48081e-180	0.349094	0.572	0.458	1.85069e-177	RPCs	MA1607.1	Foxl2
1899	6.78229e-179	0.360617	0.572	0.456	5.05959e-176	RPCs	MA0683.1	POU4F2
1900	9.83153e-178	0.271144	0.591	0.473	7.33432e-175	RPCs	MA0753.2	ZNF740
1901	5.68042e-176	0.32502	0.595	0.482	4.23759e-173	RPCs	MA0751.1	ZIC4
1902	6.29265e-173	0.323529	0.554	0.444	4.69431e-170	RPCs	MA0911.1	Hoxa11
1903	2.51056e-169	0.331195	0.561	0.448	1.87288e-166	RPCs	MA1479.1	DMRTC2
1904	1.6689e-168	0.337484	0.57	0.464	1.245e-165	RPCs	MA0102.4	CEBPA
1905	3.17355e-168	0.303324	0.568	0.46	2.36747e-165	RPCs	MA0838.1	CEBPG
1906	3.82022e-167	0.311116	0.565	0.453	2.84988e-164	RPCs	MA0791.1	POU4F3
1907	1.18367e-166	0.379208	0.588	0.481	8.83016e-164	RPCs	MA0731.1	BCL6B
1908	4.58349e-161	0.30138	0.572	0.463	3.41928e-158	RPCs	MA0837.1	CEBPE
1909	2.55078e-158	0.33516	0.613	0.495	1.90288e-155	RPCs	MA0081.2	SPIB
1910	4.07243e-158	0.306827	0.559	0.458	3.03803e-155	RPCs	MA0851.1	Foxj3
1911	1.79565e-156	0.381344	0.62	0.504	1.33955e-153	RPCs	MA1116.1	RBPJ
1912	7.56404e-156	0.334657	0.621	0.506	5.64277e-153	RPCs	MA1656.1	ZNF449
1913	1.03484e-154	0.375085	0.621	0.51	7.71991e-152	RPCs	MA0737.1	GLIS3
1914	1.90712e-154	0.343285	0.561	0.46	1.42271e-151	RPCs	MA0650.2	HOXA13
1915	1.69739e-152	0.349324	0.561	0.46	1.26625e-149	RPCs	MA0624.1	NFATC1
1916	1.94555e-152	0.359826	0.566	0.462	1.45138e-149	RPCs	MA1115.1	POU5F1
1917	5.34817e-151	0.281781	0.551	0.448	3.98973e-148	RPCs	MA0469.3	E2F3
1918	1.23377e-150	0.318819	0.561	0.458	9.20391e-148	RPCs	MA0465.2	CDX2
1919	4.04767e-150	0.288102	0.551	0.443	3.01956e-147	RPCs	MA0046.2	HNF1A
1920	1.41744e-148	0.346641	0.571	0.466	1.05741e-145	RPCs	MA0507.1	POU2F2
1921	7.8092e-144	0.267571	0.549	0.451	5.82566e-141	RPCs	MA0681.2	PHOX2B
1922	1.09421e-143	0.456038	0.578	0.486	8.16281e-141	RPCs	MA0089.2	NFE2L1
1923	6.75875e-142	0.343918	0.58	0.476	5.04203e-139	RPCs	MA0495.3	MAFF
1924	1.98477e-141	0.316914	0.557	0.465	1.48064e-138	RPCs	MA0031.1	FOXD1
1925	1.98477e-141	0.316914	0.557	0.465	1.48064e-138	RPCs	MA0157.2	FOXO3
1926	6.4664e-141	0.30918	0.598	0.496	4.82393e-138	RPCs	MA0736.1	GLIS2
1927	1.80907e-138	0.286761	0.593	0.491	1.34957e-135	RPCs	MA0729.1	RARA
1928	2.50173e-135	0.254132	0.607	0.5	1.86629e-132	RPCs	MA1615.1	Plagl1
1929	1.17263e-134	0.318245	0.566	0.471	8.74785e-132	RPCs	MA0852.2	FOXK1
1930	7.47623e-131	0.253077	0.57	0.475	5.57727e-128	RPCs	MA1584.1	ZIC5
1931	9.9037e-130	0.270166	0.563	0.466	7.38816e-127	RPCs	MA0466.2	CEBPB
1932	1.8834e-129	0.299146	0.569	0.472	1.40502e-126	RPCs	MA1133.1	JUN::JUNB(var.2)
1933	3.59485e-126	0.284972	0.542	0.452	2.68176e-123	RPCs	MA0676.1	Nr2e1
1934	1.0116e-125	0.264233	0.562	0.47	7.54656e-123	RPCs	MA0695.1	ZBTB7C
1935	6.39815e-124	0.27951	0.545	0.452	4.77302e-121	RPCs	MA0613.1	FOXG1
1936	5.77245e-123	0.304929	0.561	0.471	4.30625e-120	RPCs	MA1103.2	FOXK2
1937	1.14192e-122	0.29438	0.561	0.472	8.51871e-120	RPCs	MA0481.3	FOXP1
1938	3.58255e-121	0.37326	0.574	0.489	2.67259e-118	RPCs	MA0501.1	MAF::NFE2
1939	2.13688e-118	0.323294	0.582	0.492	1.59411e-115	RPCs	MA0164.1	Nr2e3
1940	7.32199e-115	0.29325	0.556	0.474	5.46221e-112	RPCs	MA0042.2	FOXI1
1941	7.32199e-115	0.29325	0.556	0.474	5.46221e-112	RPCs	MA0033.2	FOXL1
1942	7.32199e-115	0.29325	0.556	0.474	5.46221e-112	RPCs	MA0848.1	FOXO4
1943	7.32199e-115	0.29325	0.556	0.474	5.46221e-112	RPCs	MA0849.1	FOXO6
1944	7.32199e-115	0.29325	0.556	0.474	5.46221e-112	RPCs	MA0850.1	FOXP3
1945	1.22923e-109	0.26818	0.58	0.49	9.17005e-107	RPCs	MA0696.1	ZIC1
1946	3.27215e-109	0.26815	0.564	0.475	2.44103e-106	RPCs	MA0672.1	NKX2-3
1947	5.97696e-109	0.27205	0.583	0.493	4.45882e-106	RPCs	MA0859.1	Rarg
1948	1.31016e-108	0.267326	0.535	0.452	9.77377e-106	RPCs	MA0715.1	PROP1
1949	4.93431e-108	0.29115	0.56	0.477	3.68099e-105	RPCs	MA0152.1	NFATC2
1950	1.54855e-103	0.261	0.56	0.468	1.15522e-100	RPCs	MA0070.1	PBX1
1951	1.9936e-103	0.288774	0.544	0.464	1.48723e-100	RPCs	MA0627.2	POU2F3
1952	1.29658e-99	0.265771	0.576	0.492	9.67251e-97	RPCs	MA0735.1	GLIS1
1953	1.3054e-95	0.321357	0.593	0.503	9.73826e-93	RPCs	MA1592.1	ZNF274
1954	2.11439e-86	0.27133	0.564	0.484	1.57734e-83	RPCs	MA0463.2	BCL6
1955	3.18933e-85	0.250436	0.527	0.456	2.37924e-82	RPCs	MA0785.1	POU2F1
1956	1.35021e-82	0.271451	0.57	0.49	1.00726e-79	RPCs	MA0842.2	NRL
1957	8.43201e-79	0.256224	0.595	0.508	6.29028e-76	RPCs	MA0065.2	Pparg::Rxra
1958	2.74007e-76	0.25572	0.587	0.509	2.04409e-73	RPCs	MA1649.1	ZBTB12
1959	3.08298e-76	0.261907	0.571	0.491	2.2999e-73	RPCs	MA0659.2	MAFG
1960	3.93044e-76	0.260899	0.516	0.457	2.93211e-73	RPCs	MA0713.1	PHOX2A
1961	1.26795e-69	0.254125	0.588	0.509	9.45888e-67	RPCs	MA1535.1	NR2C1
1962	4.62847e-65	0.280433	0.608	0.525	3.45284e-62	RPCs	MA1654.1	ZNF16
1963	6.77407e-60	0.260474	0.585	0.518	5.05346e-57	RPCs	MA1629.1	Zic2
1964	1.48051e-35	0.277821	0.579	0.524	1.10446e-32	RPCs	MA1155.1	ZSCAN4
1965	0	2.42499	0.934	0.514	0	glycinergic amacrine cells	MA0600.2	RFX2
1966	0	2.2554	0.931	0.516	0	glycinergic amacrine cells	MA0510.2	RFX5
1967	0	2.09014	0.921	0.51	0	glycinergic amacrine cells	MA0799.1	RFX4
1968	0	1.8766	0.856	0.457	0	glycinergic amacrine cells	MA0774.1	MEIS2
1969	0	1.81243	0.918	0.522	0	glycinergic amacrine cells	MA0798.2	RFX3
1970	0	1.68322	0.894	0.44	0	glycinergic amacrine cells	MA0003.4	TFAP2A
1971	0	1.67397	0.9	0.523	0	glycinergic amacrine cells	MA0509.2	RFX1
1972	0	1.64412	0.84	0.471	0	glycinergic amacrine cells	MA0775.1	MEIS3
1973	0	1.62968	0.837	0.459	0	glycinergic amacrine cells	MA0498.2	MEIS1
1974	0	1.54931	0.924	0.435	0	glycinergic amacrine cells	MA0006.1	Ahr::Arnt
1975	0	1.48053	0.858	0.454	0	glycinergic amacrine cells	MA0812.1	TFAP2B(var.2)
1976	0	1.46722	0.85	0.465	0	glycinergic amacrine cells	MA0811.1	TFAP2B
1977	0	1.43072	0.81	0.464	0	glycinergic amacrine cells	MA1112.2	NR4A1
1978	0	1.40632	0.834	0.462	0	glycinergic amacrine cells	MA0524.2	TFAP2C
1979	0	1.29698	0.845	0.52	0	glycinergic amacrine cells	MA1155.1	ZSCAN4
1980	0	1.27362	0.806	0.479	0	glycinergic amacrine cells	MA0796.1	TGIF1
1981	0	1.26943	0.872	0.422	0	glycinergic amacrine cells	MA0814.2	TFAP2C(var.2)
1982	0	1.24844	0.83	0.441	0	glycinergic amacrine cells	MA1569.1	TFAP2E
1983	0	1.23972	0.833	0.441	0	glycinergic amacrine cells	MA0810.1	TFAP2A(var.2)
1984	0	1.23801	0.791	0.479	0	glycinergic amacrine cells	MA0797.1	TGIF2
1985	0	1.23339	0.825	0.506	0	glycinergic amacrine cells	MA1593.1	ZNF317
1986	0	1.18177	0.792	0.484	0	glycinergic amacrine cells	MA0783.1	PKNOX2
1987	0	1.12292	0.786	0.475	0	glycinergic amacrine cells	MA0507.1	POU2F2
1988	0	1.09204	0.865	0.477	0	glycinergic amacrine cells	MA1644.1	NFYC
1989	0	1.0673	0.831	0.468	0	glycinergic amacrine cells	MA1651.1	ZFP42
1990	0	1.06356	0.818	0.518	0	glycinergic amacrine cells	MA0154.4	EBF1
1991	0	1.05312	0.798	0.488	0	glycinergic amacrine cells	MA0813.1	TFAP2B(var.3)
1992	0	1.04112	0.851	0.478	0	glycinergic amacrine cells	MA0060.3	NFYA
1993	0	1.03681	0.756	0.473	0	glycinergic amacrine cells	MA1115.1	POU5F1
1994	0	1.02896	0.817	0.518	0	glycinergic amacrine cells	MA1646.1	OSR2
1995	0	1.02558	0.749	0.469	0	glycinergic amacrine cells	MA0627.2	POU2F3
1996	0	1.00389	0.75	0.467	0	glycinergic amacrine cells	MA0784.1	POU1F1
1997	0	1.00255	0.779	0.465	0	glycinergic amacrine cells	MA0790.1	POU4F1
1998	0	1.00083	0.756	0.459	0	glycinergic amacrine cells	MA0788.1	POU3F3
1999	0	0.942549	0.788	0.489	0	glycinergic amacrine cells	MA0872.1	TFAP2A(var.3)
[truncated: 2,245 more rows]
